# Supplementary material for: Modeling the Impact of Management Changes on the Infection Dynamics of Extended-Spectrum Beta-Lactamase-Producing Escherichia coli in the Broiler Production
Source: MDPI journal article supplement (doi:10.3390/microorganisms10050981), 2022-05-07
Supplement: s1 [file s1]

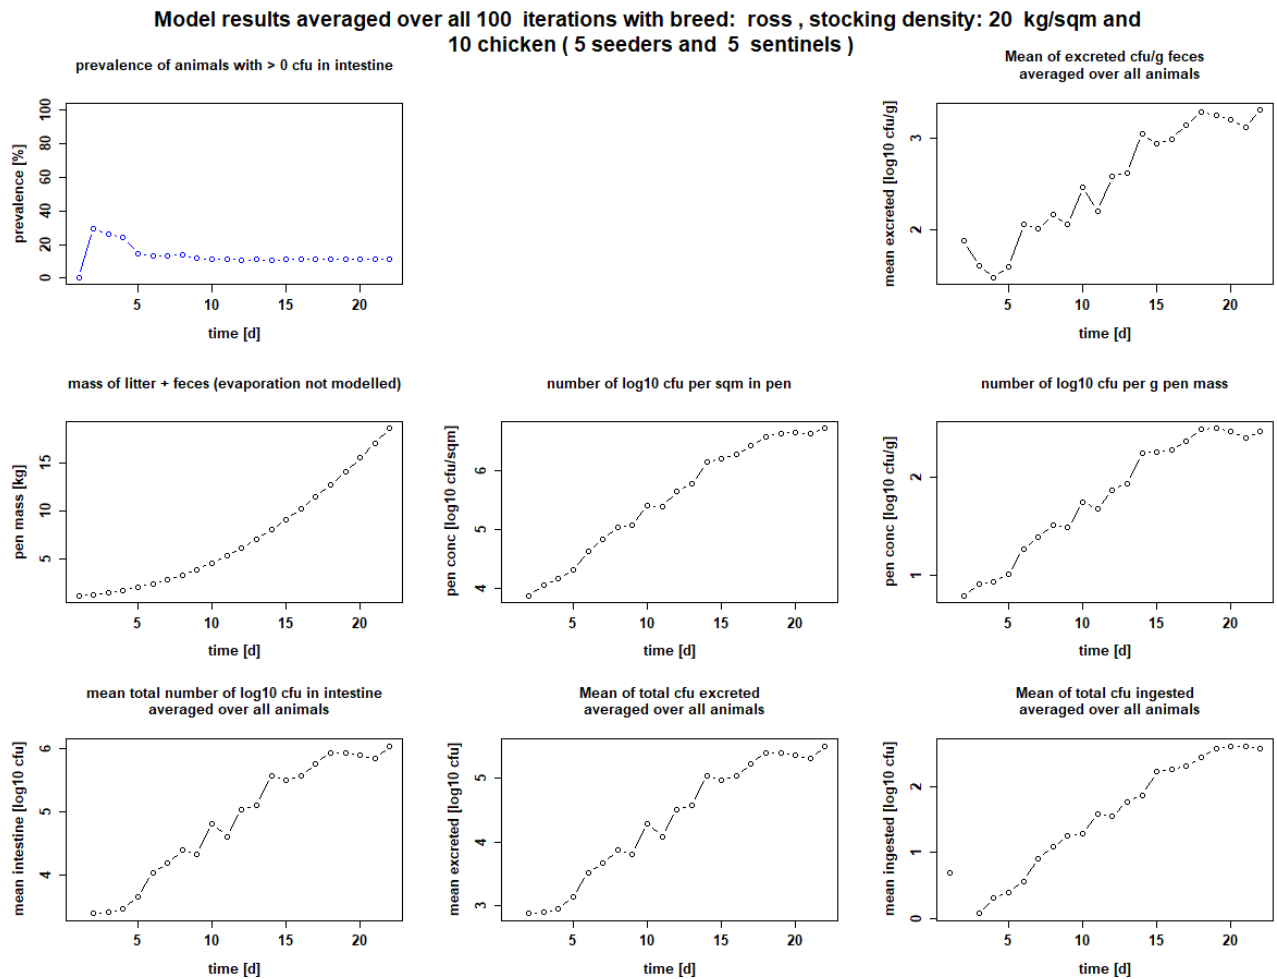

**Figure S1. Calculated infection dynamic for the scenario when day-old chicks are set positive ( $10^1$  CFU bacteria per chick on day 1).** Dotplots with results for 10 chicks, 5 seeder, 5 sentinels, Ross 308, target weight 2 kg, feeding duration 21 days, stocking density 20 kg/m<sup>2</sup>, 1000 g litter/m<sup>2</sup>

**Table S1a (CFU). Calculated numeric values for the scenario when day-old chicks are set positive ( $10^1$  CFU bacteria per chick on day 1).** Setting: 5 seeder, 5 sentinels, Ross 308, target weight 2 kg, feeding duration 21 days, stocking density 20 kg/m<sup>2</sup>, 1000 g litter/m<sup>2</sup>.

| day | prevalence in %  | cfu/sqm            | cfu/g manure       | cfu in intestine   | cfu/g feces        | cfu ingested per animal |
|-----|------------------|--------------------|--------------------|--------------------|--------------------|-------------------------|
|     | (mean $\pm$ sd)  | (mean $\pm$ sd)    | (mean $\pm$ sd)    | (mean $\pm$ sd)    | (mean $\pm$ sd)    | (mean $\pm$ sd)         |
| 1   | 0 $\pm$ 0        | 0e0 $\pm$ 0        | 0e0 $\pm$ 0        | 0e0 $\pm$ 0        | 0e0 $\pm$ 0        | 5 $\pm$ 0               |
| 2   | 29.2 $\pm$ 10.61 | 7.5e3 $\pm$ 10.8e3 | 6.2 $\pm$ 9        | 2.5e3 $\pm$ 3.6e3  | 7.5e1 $\pm$ 10.8e1 | 0e0 $\pm$ 0             |
| 3   | 26.3 $\pm$ 20.48 | 1.1e4 $\pm$ 1.8e4  | 8.2 $\pm$ 12.9     | 2.6e3 $\pm$ 4.7e3  | 4e1 $\pm$ 7.3e1    | 1.18 $\pm$ 2            |
| 4   | 24.1 $\pm$ 27.75 | 1.5e4 $\pm$ 3.8e4  | 8.6 $\pm$ 22.2     | 2.9e3 $\pm$ 10e3   | 2.9e1 $\pm$ 10e1   | 2.03 $\pm$ 3.8          |
| 5   | 14.6 $\pm$ 30.73 | 2.1e4 $\pm$ 8.2e4  | 1e1 $\pm$ 4e1      | 4.6e3 $\pm$ 21.2e3 | 3.9e1 $\pm$ 18.1e1 | 2.51 $\pm$ 7.4          |
| 6   | 13.3 $\pm$ 31.97 | 4.3e4 $\pm$ 27.5e4 | 1.9e1 $\pm$ 11.8e1 | 1.1e4 $\pm$ 7.9e4  | 1.2e2 $\pm$ 8.3e2  | 3.69 $\pm$ 15.6         |
| 7   | 13.5 $\pm$ 31.79 | 6.8e4 $\pm$ 44e4   | 2.4e1 $\pm$ 15.8e1 | 1.5e4 $\pm$ 10.1e4 | 1e2 $\pm$ 6.7e2    | 8.09 $\pm$ 52.8         |
| 8   | 13.6 $\pm$ 33.5  | 1.1e5 $\pm$ 6.3e5  | 3.3e1 $\pm$ 19.2e1 | 2.5e4 $\pm$ 13.8e4 | 1.4e2 $\pm$ 8.2e2  | 1.22e1 $\pm$ 8e1        |
| 9   | 11.7 $\pm$ 30.82 | 1.2e5 $\pm$ 5.9e5  | 3.1e1 $\pm$ 15.3e1 | 2.2e4 $\pm$ 10.5e4 | 1.1e2 $\pm$ 5.6e2  | 1.82e1 $\pm$ 10.7e1     |
| 10  | 11 $\pm$ 30.7    | 2.5e5 $\pm$ 16.1e5 | 5.6e1 $\pm$ 35.5e1 | 6.5e4 $\pm$ 44.2e4 | 2.9e2 $\pm$ 19.9e2 | 1.92e1 $\pm$ 9.6e1      |
| 11  | 11.4 $\pm$ 31.4  | 2.5e5 $\pm$ 12.2e5 | 4.7e1 $\pm$ 23.1e1 | 4.1e4 $\pm$ 17.2e4 | 1.6e2 $\pm$ 6.8e2  | 3.84e1 $\pm$ 24.3e1     |
| 12  | 10.6 $\pm$ 30.45 | 4.5e5 $\pm$ 21.3e5 | 7.3e1 $\pm$ 34.8e1 | 1.1e5 $\pm$ 5.5e5  | 3.9e2 $\pm$ 19.7e2 | 3.56e1 $\pm$ 17.4e1     |
| 13  | 11 $\pm$ 31.45   | 6e5 $\pm$ 31e5     | 8.6e1 $\pm$ 44.1e1 | 1.3e5 $\pm$ 7e5    | 4.2e2 $\pm$ 23.4e2 | 5.95e1 $\pm$ 28.3e1     |
| 14  | 10.8 $\pm$ 30.93 | 1.4e6 $\pm$ 7.4e6  | 1.8e2 $\pm$ 9.2e2  | 3.7e5 $\pm$ 19.5e5 | 1.1e3 $\pm$ 5.9e3  | 7.58e1 $\pm$ 38.9e1     |
| 15  | 11 $\pm$ 31.45   | 1.6e6 $\pm$ 8.7e6  | 1.8e2 $\pm$ 9.6e2  | 3.1e5 $\pm$ 17e5   | 8.7e2 $\pm$ 47.6e2 | 1.7e2 $\pm$ 8.9e2       |
| 16  | 11 $\pm$ 31.45   | 1.9e6 $\pm$ 9.3e6  | 1.9e2 $\pm$ 9.1e2  | 3.6e5 $\pm$ 19.1e5 | 9.9e2 $\pm$ 51.8e2 | 1.87e2 $\pm$ 9.9e2      |
| 17  | 11 $\pm$ 31.45   | 2.7e6 $\pm$ 12.9e6 | 2.3e2 $\pm$ 11.3e2 | 5.7e5 $\pm$ 28.7e5 | 1.4e3 $\pm$ 7.1e3  | 2.08e2 $\pm$ 10.1e2     |
| 18  | 11 $\pm$ 31.45   | 3.9e6 $\pm$ 20.7e6 | 3.1e2 $\pm$ 16.3e2 | 8.5e5 $\pm$ 49.7e5 | 2e3 $\pm$ 11.4e3   | 2.79e2 $\pm$ 13.4e2     |
| 19  | 11 $\pm$ 31.45   | 4.4e6 $\pm$ 23e6   | 3.1e2 $\pm$ 16.3e2 | 8.2e5 $\pm$ 42.7e5 | 1.8e3 $\pm$ 9.3e3  | 3.86e2 $\pm$ 20.5e2     |
| 20  | 11 $\pm$ 31.45   | 4.5e6 $\pm$ 20.9e6 | 2.9e2 $\pm$ 13.5e2 | 7.6e5 $\pm$ 33.1e5 | 1.6e3 $\pm$ 7e3    | 4.22e2 $\pm$ 21.9e2     |
| 21  | 11 $\pm$ 31.45   | 4.3e6 $\pm$ 19e6   | 2.5e2 $\pm$ 11.2e2 | 6.8e5 $\pm$ 29.3e5 | 1.3e3 $\pm$ 5.8e3  | 4.15e2 $\pm$ 19.3e2     |
| 22  | 11 $\pm$ 31.45   | 5.4e6 $\pm$ 23.1e6 | 2.9e2 $\pm$ 12.4e2 | 1.1e6 $\pm$ 4.7e6  | 2e3 $\pm$ 9e3      | 3.81e2 $\pm$ 16.9e2     |

The average of the prevalence, the CFU-values per square meter (cfu/sqm) and per gram manure are calculated over all iterations. The CFU values in the intestine as well as the excreted and ingested quantities are obtained by calculating the average over all animals in one iteration at first and then over all iterations.

**Table S1b (log<sub>10</sub> CFU). Calculated numeric values for the scenario when day-old chicks are set positive (10<sup>1</sup> CFU bacteria per chick on day 1).** Setting: 5 seeder, 5 sentinels, Ross 308, target weight 2 kg, feeding duration 21 days, stocking density 20 kg/m<sup>2</sup>, 1000 g litter/m<sup>2</sup>

| day | prevalence in % | cfu/sqm                       | cfu/g manure                  | cfu in intestine              | cfu/g feces                   | cfu ingested per animal       |
|-----|-----------------|-------------------------------|-------------------------------|-------------------------------|-------------------------------|-------------------------------|
|     | (% mean ± sd)   | (log <sub>10</sub> mean ± sd) | (log <sub>10</sub> mean ± sd) | (log <sub>10</sub> mean ± sd) | (log <sub>10</sub> mean ± sd) | (log <sub>10</sub> mean ± sd) |
| 1   | 0 ± 0           | -Inf ± -Inf                   | -Inf ± -Inf                   | -Inf ± -Inf                   | -Inf ± -Inf                   | 0.7 ± 0                       |
| 2   | 29.2 ± 10.61    | 3.87 ± 4.03                   | 0.79 ± 0.95                   | 3.4 ± 3.56                    | 1.87 ± 2.03                   | -Inf ± 0                      |
| 3   | 26.3 ± 20.48    | 4.06 ± 4.25                   | 0.92 ± 1.11                   | 3.41 ± 3.67                   | 1.6 ± 1.86                    | 0.07 ± 0.31                   |
| 4   | 24.1 ± 27.75    | 4.16 ± 4.58                   | 0.93 ± 1.35                   | 3.47 ± 4                      | 1.47 ± 2                      | 0.31 ± 0.58                   |
| 5   | 14.6 ± 30.73    | 4.32 ± 4.91                   | 1.01 ± 1.6                    | 3.66 ± 4.33                   | 1.59 ± 2.26                   | 0.4 ± 0.87                    |
| 6   | 13.3 ± 31.97    | 4.64 ± 5.44                   | 1.27 ± 2.07                   | 4.04 ± 4.9                    | 2.06 ± 2.92                   | 0.57 ± 1.19                   |
| 7   | 13.5 ± 31.79    | 4.83 ± 5.64                   | 1.39 ± 2.2                    | 4.19 ± 5                      | 2.01 ± 2.83                   | 0.91 ± 1.72                   |
| 8   | 13.6 ± 33.5     | 5.03 ± 5.8                    | 1.51 ± 2.28                   | 4.39 ± 5.14                   | 2.16 ± 2.91                   | 1.08 ± 1.9                    |
| 9   | 11.7 ± 30.82    | 5.07 ± 5.77                   | 1.49 ± 2.18                   | 4.33 ± 5.02                   | 2.06 ± 2.74                   | 1.26 ± 2.03                   |
| 10  | 11 ± 30.7       | 5.4 ± 6.21                    | 1.75 ± 2.55                   | 4.81 ± 5.65                   | 2.46 ± 3.3                    | 1.28 ± 1.98                   |
| 11  | 11.4 ± 31.4     | 5.4 ± 6.09                    | 1.67 ± 2.36                   | 4.61 ± 5.24                   | 2.21 ± 2.83                   | 1.58 ± 2.39                   |
| 12  | 10.6 ± 30.45    | 5.65 ± 6.33                   | 1.87 ± 2.54                   | 5.03 ± 5.74                   | 2.59 ± 3.29                   | 1.55 ± 2.24                   |
| 13  | 11 ± 31.45      | 5.78 ± 6.49                   | 1.93 ± 2.64                   | 5.1 ± 5.85                    | 2.63 ± 3.37                   | 1.77 ± 2.45                   |
| 14  | 10.8 ± 30.93    | 6.15 ± 6.87                   | 2.24 ± 2.96                   | 5.57 ± 6.29                   | 3.05 ± 3.77                   | 1.88 ± 2.59                   |
| 15  | 11 ± 31.45      | 6.21 ± 6.94                   | 2.26 ± 2.98                   | 5.49 ± 6.23                   | 2.94 ± 3.68                   | 2.23 ± 2.95                   |
| 16  | 11 ± 31.45      | 6.28 ± 6.97                   | 2.27 ± 2.96                   | 5.56 ± 6.28                   | 3 ± 3.71                      | 2.27 ± 3                      |
| 17  | 11 ± 31.45      | 6.43 ± 7.11                   | 2.37 ± 3.05                   | 5.76 ± 6.46                   | 3.15 ± 3.85                   | 2.32 ± 3.01                   |
| 18  | 11 ± 31.45      | 6.59 ± 7.32                   | 2.49 ± 3.21                   | 5.93 ± 6.7                    | 3.29 ± 4.06                   | 2.45 ± 3.13                   |
| 19  | 11 ± 31.45      | 6.65 ± 7.36                   | 2.5 ± 3.21                    | 5.92 ± 6.63                   | 3.26 ± 3.97                   | 2.59 ± 3.31                   |
| 20  | 11 ± 31.45      | 6.65 ± 7.32                   | 2.46 ± 3.13                   | 5.88 ± 6.52                   | 3.21 ± 3.84                   | 2.63 ± 3.34                   |
| 21  | 11 ± 31.45      | 6.63 ± 7.28                   | 2.4 ± 3.05                    | 5.83 ± 6.47                   | 3.13 ± 3.76                   | 2.62 ± 3.28                   |
| 22  | 11 ± 31.45      | 6.73 ± 7.36                   | 2.46 ± 3.09                   | 6.03 ± 6.67                   | 3.31 ± 3.95                   | 2.58 ± 3.23                   |

The average of the prevalence, the CFU-values per square meter (cfu/sqm) and per gram manure are calculated over all iterations. The CFU values in the intestine as well as the excreted and ingested quantities are obtained by calculating the average over all animals in one iteration at first and then over all iterations. The decadic logarithm of zero or negative values is negative infinite (-Inf).

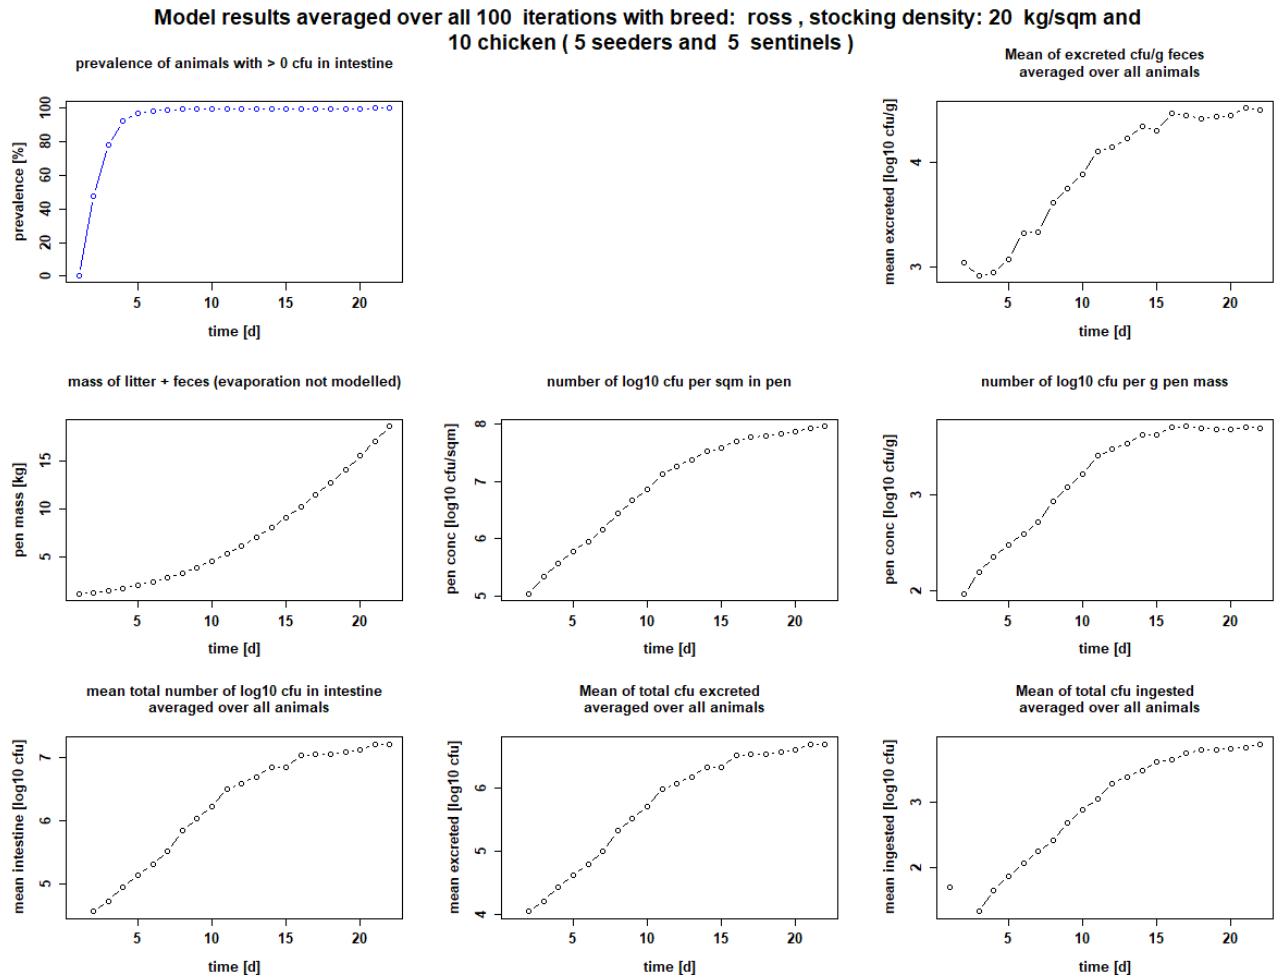

**Figure S2. Calculated infection dynamic for the scenario when day-old chicks are set positive ( $10^2$  CFU bacteria per chick on day 1).** Dotplots with results for 10 chicks, 5 seeder, 5 sentinels, Ross 308, target weight 2 kg, feeding duration 21 days, stocking density 20 kg/m<sup>2</sup>, 1000 g litter/m<sup>2</sup>

**Table S2a (CFU). Calculated numeric values for the scenario when day-old chicks are set positive ( $10^2$  CFU bacteria per chick on day 1).** Setting: 5 seeder, 5 sentinels, Ross 308, target weight 2 kg, feeding duration 21 days, stocking density 20 kg/m<sup>2</sup>, 1000 g litter/m<sup>2</sup>

| day | prevalence in %  | cfu/sqm            | cfu/g manure       | cfu in intestine   | cfu/g feces        | cfu ingested per animal |
|-----|------------------|--------------------|--------------------|--------------------|--------------------|-------------------------|
|     | (mean $\pm$ sd)  | (mean $\pm$ sd)    | (mean $\pm$ sd)    | (mean $\pm$ sd)    | (mean $\pm$ sd)    | (mean $\pm$ sd)         |
| 1   | 0 $\pm$ 0        | 0e0 $\pm$ 0        | 0e0 $\pm$ 0        | 0e0 $\pm$ 0        | 0e0 $\pm$ 0        | 5e1 $\pm$ 0e1           |
| 2   | 47.6 $\pm$ 4.74  | 1.1e5 $\pm$ 1.3e5  | 9.2e1 $\pm$ 10.8e1 | 3.7e4 $\pm$ 4.3e4  | 1.1e3 $\pm$ 1.3e3  | 0e0 $\pm$ 0             |
| 3   | 78 $\pm$ 21.79   | 2.2e5 $\pm$ 2.7e5  | 1.5e2 $\pm$ 2e2    | 5.4e4 $\pm$ 7.5e4  | 8.3e2 $\pm$ 11.7e2 | 2.13e1 $\pm$ 2.6e1      |
| 4   | 92.4 $\pm$ 13.86 | 3.8e5 $\pm$ 4.5e5  | 2.2e2 $\pm$ 2.7e2  | 9e4 $\pm$ 11.3e4   | 8.9e2 $\pm$ 11.3e2 | 4.5e1 $\pm$ 5.8e1       |
| 5   | 97.1 $\pm$ 9.13  | 6.1e5 $\pm$ 10.4e5 | 3e2 $\pm$ 5.1e2    | 1.4e5 $\pm$ 2.9e5  | 1.2e3 $\pm$ 2.5e3  | 7.42e1 $\pm$ 9e1        |
| 6   | 98.5 $\pm$ 5.92  | 9.1e5 $\pm$ 11.2e5 | 3.9e2 $\pm$ 4.8e2  | 2e5 $\pm$ 2.6e5    | 2.1e3 $\pm$ 2.8e3  | 1.16e2 $\pm$ 2e2        |
| 7   | 99.2 $\pm$ 4.42  | 1.4e6 $\pm$ 1.9e6  | 5.2e2 $\pm$ 6.7e2  | 3.3e5 $\pm$ 4.8e5  | 2.2e3 $\pm$ 3.2e3  | 1.74e2 $\pm$ 2.1e2      |
| 8   | 99.4 $\pm$ 5.09  | 2.8e6 $\pm$ 4.1e6  | 8.5e2 $\pm$ 12.4e2 | 6.9e5 $\pm$ 11.5e5 | 4.1e3 $\pm$ 6.8e3  | 2.6e2 $\pm$ 3.4e2       |
| 9   | 99.4 $\pm$ 4.45  | 4.6e6 $\pm$ 7.1e6  | 1.2e3 $\pm$ 1.8e3  | 1.1e6 $\pm$ 1.8e6  | 5.6e3 $\pm$ 9.3e3  | 4.73e2 $\pm$ 6.9e2      |
| 10  | 99.6 $\pm$ 3.15  | 7.4e6 $\pm$ 11.9e6 | 1.6e3 $\pm$ 2.6e3  | 1.7e6 $\pm$ 3.1e6  | 7.6e3 $\pm$ 13.9e3 | 7.49e2 $\pm$ 11.5e2     |
| 11  | 99.5 $\pm$ 5     | 1.3e7 $\pm$ 2.6e7  | 2.5e3 $\pm$ 4.9e3  | 3.2e6 $\pm$ 6.9e6  | 1.3e4 $\pm$ 2.7e4  | 1.12e3 $\pm$ 1.8e3      |
| 12  | 99.7 $\pm$ 2.23  | 1.8e7 $\pm$ 3e7    | 3e3 $\pm$ 4.9e3    | 3.8e6 $\pm$ 7.1e6  | 1.4e4 $\pm$ 2.5e4  | 1.91e3 $\pm$ 3.7e3      |
| 13  | 99.7 $\pm$ 3     | 2.4e7 $\pm$ 3.3e7  | 3.4e3 $\pm$ 4.7e3  | 5e6 $\pm$ 7e6      | 1.7e4 $\pm$ 2.3e4  | 2.41e3 $\pm$ 4e3        |
| 14  | 99.6 $\pm$ 4     | 3.3e7 $\pm$ 4.1e7  | 4.1e3 $\pm$ 5.1e3  | 7.1e6 $\pm$ 8.9e6  | 2.1e4 $\pm$ 2.7e4  | 3.01e3 $\pm$ 4.2e3      |
| 15  | 99.8 $\pm$ 2     | 3.8e7 $\pm$ 4.1e7  | 4.2e3 $\pm$ 4.5e3  | 7.1e6 $\pm$ 8.4e6  | 2e4 $\pm$ 2.3e4    | 4e3 $\pm$ 4.9e3         |
| 16  | 99.7 $\pm$ 3     | 5.1e7 $\pm$ 4.8e7  | 5e3 $\pm$ 4.8e3    | 1.1e7 $\pm$ 1.1e7  | 2.9e4 $\pm$ 2.9e4  | 4.32e3 $\pm$ 4.7e3      |
| 17  | 99.9 $\pm$ 1     | 5.9e7 $\pm$ 5.2e7  | 5.2e3 $\pm$ 4.5e3  | 1.1e7 $\pm$ 1.1e7  | 2.8e4 $\pm$ 2.6e4  | 5.51e3 $\pm$ 5.3e3      |
| 18  | 99.8 $\pm$ 2     | 6.3e7 $\pm$ 5.5e7  | 4.9e3 $\pm$ 4.3e3  | 1.1e7 $\pm$ 1.2e7  | 2.5e4 $\pm$ 2.7e4  | 6.13e3 $\pm$ 5.4e3      |
| 19  | 99.9 $\pm$ 1     | 6.8e7 $\pm$ 5.3e7  | 4.8e3 $\pm$ 3.8e3  | 1.2e7 $\pm$ 1.1e7  | 2.7e4 $\pm$ 2.4e4  | 6.2e3 $\pm$ 5.5e3       |
| 20  | 99.9 $\pm$ 1     | 7.3e7 $\pm$ 5.4e7  | 4.7e3 $\pm$ 3.5e3  | 1.3e7 $\pm$ 1.1e7  | 2.7e4 $\pm$ 2.3e4  | 6.48e3 $\pm$ 5.1e3      |
| 21  | 100 $\pm$ 0      | 8.5e7 $\pm$ 6.1e7  | 5e3 $\pm$ 3.6e3    | 1.6e7 $\pm$ 1.3e7  | 3.2e4 $\pm$ 2.6e4  | 6.73e3 $\pm$ 5e3        |
| 22  | 100 $\pm$ 0      | 9.2e7 $\pm$ 6e7    | 4.9e3 $\pm$ 3.2e3  | 1.6e7 $\pm$ 1.2e7  | 3.1e4 $\pm$ 2.3e4  | 7.59e3 $\pm$ 5.4e3      |

The average of the prevalence, the CFU-values per square meter (cfu/sqm) and per gram manure are calculated over all iterations. The CFU values in the intestine as well as the excreted and ingested quantities are obtained by calculating the average over all animals in one iteration at first and then over all iterations.

**Table S2b (log<sub>10</sub> CFU). Calculated numeric values for the scenario when day-old chicks are set positive (10<sup>2</sup> CFU bacteria per chick on day 1).** Setting: 5 seeder, 5 sentinels, Ross 308, target weight 2 kg, feeding duration 21 days, stocking density 20 kg/m<sup>2</sup>, 1000 g litter/m<sup>2</sup>

| day | prevalence in % | cfu/sqm           | cfu/g manure      | cfu in intestine  | cfu/g feces       | cfu ingested per animal |
|-----|-----------------|-------------------|-------------------|-------------------|-------------------|-------------------------|
|     | (% mean ± sd)   | (log10 mean ± sd) | (log10 mean ± sd) | (log10 mean ± sd) | (log10 mean ± sd) | (log10 mean ± sd)       |
| 1   | 0 ± 0           | -Inf ± -Inf       | -Inf ± -Inf       | -Inf ± -Inf       | -Inf ± -Inf       | 1.7 ± 0                 |
| 2   | 47.6 ± 4.74     | 5.04 ± 5.11       | 1.96 ± 2.03       | 4.56 ± 4.64       | 3.04 ± 3.11       | -Inf ± 0                |
| 3   | 78 ± 21.79      | 5.33 ± 5.44       | 2.19 ± 2.29       | 4.73 ± 4.88       | 2.92 ± 3.07       | 1.33 ± 1.41             |
| 4   | 92.4 ± 13.86    | 5.58 ± 5.66       | 2.35 ± 2.43       | 4.95 ± 5.05       | 2.95 ± 3.05       | 1.65 ± 1.76             |
| 5   | 97.1 ± 9.13     | 5.78 ± 6.02       | 2.47 ± 2.71       | 5.15 ± 5.46       | 3.08 ± 3.39       | 1.87 ± 1.95             |
| 6   | 98.5 ± 5.92     | 5.96 ± 6.05       | 2.59 ± 2.68       | 5.3 ± 5.42        | 3.33 ± 3.44       | 2.06 ± 2.3              |
| 7   | 99.2 ± 4.42     | 6.16 ± 6.27       | 2.71 ± 2.82       | 5.52 ± 5.68       | 3.34 ± 3.5        | 2.24 ± 2.33             |
| 8   | 99.4 ± 5.09     | 6.44 ± 6.61       | 2.93 ± 3.09       | 5.84 ± 6.06       | 3.61 ± 3.83       | 2.41 ± 2.53             |
| 9   | 99.4 ± 4.45     | 6.66 ± 6.85       | 3.08 ± 3.26       | 6.03 ± 6.25       | 3.75 ± 3.97       | 2.67 ± 2.84             |
| 10  | 99.6 ± 3.15     | 6.87 ± 7.08       | 3.21 ± 3.42       | 6.23 ± 6.49       | 3.88 ± 4.14       | 2.87 ± 3.06             |
| 11  | 99.5 ± 5        | 7.13 ± 7.41       | 3.4 ± 3.69        | 6.51 ± 6.84       | 4.1 ± 4.43        | 3.05 ± 3.26             |
| 12  | 99.7 ± 2.23     | 7.26 ± 7.48       | 3.47 ± 3.69       | 6.58 ± 6.85       | 4.14 ± 4.4        | 3.28 ± 3.57             |
| 13  | 99.7 ± 3        | 7.38 ± 7.52       | 3.53 ± 3.68       | 6.7 ± 6.85        | 4.22 ± 4.37       | 3.38 ± 3.6              |
| 14  | 99.6 ± 4        | 7.52 ± 7.61       | 3.62 ± 3.7        | 6.85 ± 6.95       | 4.33 ± 4.43       | 3.48 ± 3.62             |
| 15  | 99.8 ± 2        | 7.58 ± 7.61       | 3.62 ± 3.65       | 6.85 ± 6.92       | 4.3 ± 4.37        | 3.6 ± 3.69              |
| 16  | 99.7 ± 3        | 7.71 ± 7.69       | 3.7 ± 3.68        | 7.03 ± 7.03       | 4.46 ± 4.46       | 3.64 ± 3.67             |
| 17  | 99.9 ± 1        | 7.77 ± 7.71       | 3.71 ± 3.66       | 7.05 ± 7.02       | 4.44 ± 4.42       | 3.74 ± 3.72             |
| 18  | 99.8 ± 2        | 7.8 ± 7.74        | 3.69 ± 3.64       | 7.04 ± 7.07       | 4.41 ± 4.43       | 3.79 ± 3.73             |
| 19  | 99.9 ± 1        | 7.83 ± 7.73       | 3.68 ± 3.58       | 7.09 ± 7.03       | 4.43 ± 4.37       | 3.79 ± 3.74             |
| 20  | 99.9 ± 1        | 7.86 ± 7.74       | 3.67 ± 3.54       | 7.12 ± 7.05       | 4.44 ± 4.37       | 3.81 ± 3.71             |
| 21  | 100 ± 0         | 7.93 ± 7.79       | 3.7 ± 3.56        | 7.21 ± 7.13       | 4.51 ± 4.42       | 3.83 ± 3.7              |
| 22  | 100 ± 0         | 7.96 ± 7.78       | 3.69 ± 3.51       | 7.21 ± 7.09       | 4.49 ± 4.37       | 3.88 ± 3.74             |

The average of the prevalence, the CFU-values per square meter (cfu/sqm) and per gram manure are calculated over all iterations. The CFU values in the intestine as well as the excreted and ingested quantities are obtained by calculating the average over all animals in one iteration at first and then over all iterations. The decadic logarithm of zero or negative values is negative infinite (-Inf).

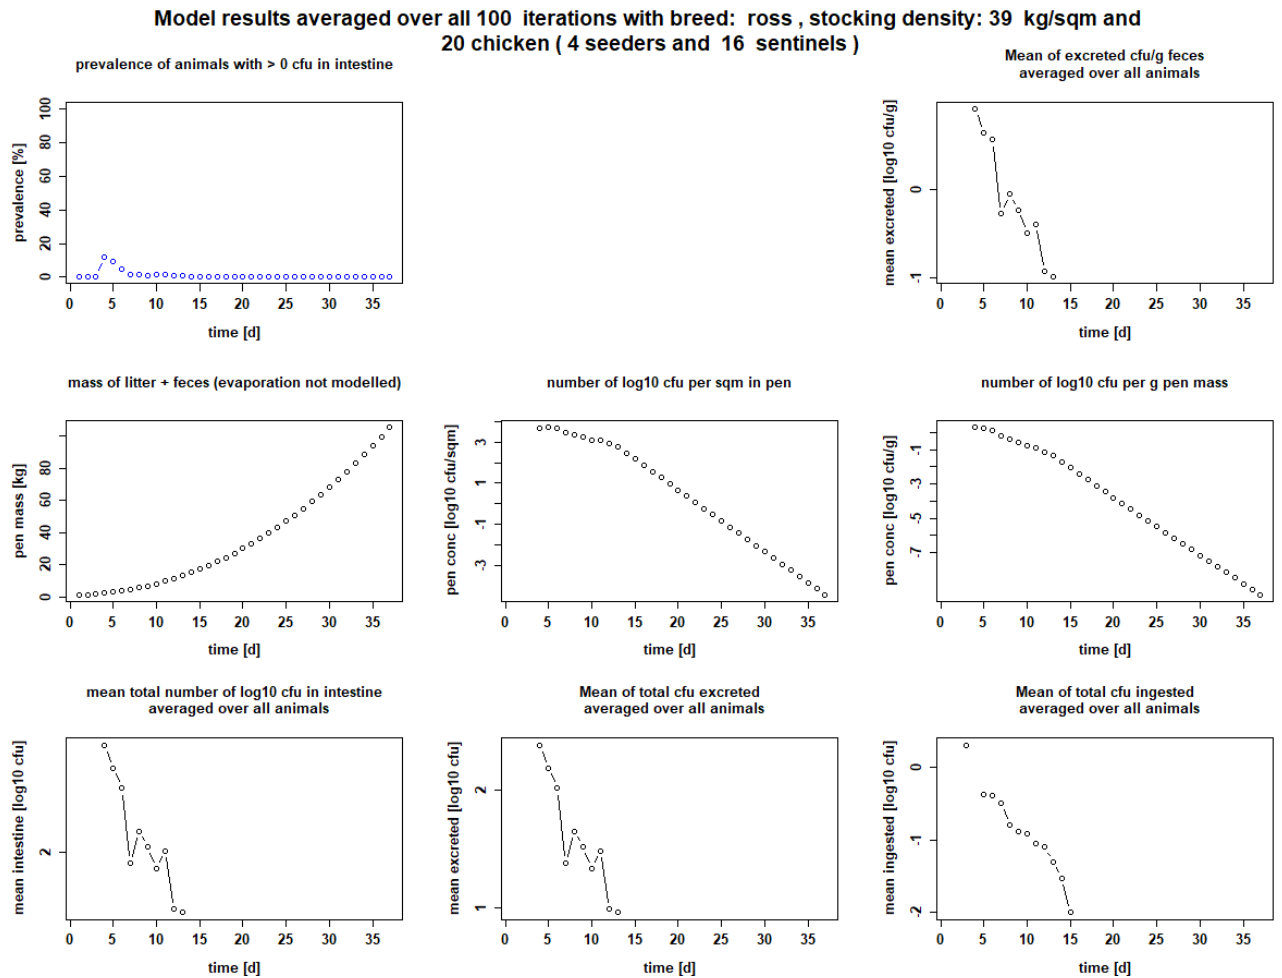

**Figure S3. Calculated infection dynamic for the scenario when chicks are set positive with  $10^1$  CFU bacteria per chick on day 3.** Dotplots with results for 20 chicks, 4 seeder, 16 sentinels, Ross 308, target weight 2 kg, feeding duration 36 days, stocking density 39 kg/m<sup>2</sup>, 1000 g litter/m<sup>2</sup>

**Table S3a (CFU). Calculated numeric values for the scenario when chicks are set positive with 10<sup>1</sup> CFU bacteria per chick on day 3.** Setting: 20 chicks, 4 seeder, 16 sentinels, Ross 308, target weight 2 kg, feeding duration 36 days, stocking density 39 kg/m<sup>2</sup>, 1000 g litter/m<sup>2</sup>

| day | prevalence in % | cfu/sqm        | cfu/g manure     | cfu in intestine | cfu/g feces      | cfu ingested per animal |
|-----|-----------------|----------------|------------------|------------------|------------------|-------------------------|
|     | (mean ± sd)     | (mean ± sd)    | (mean ± sd)      | (mean ± sd)      | (mean ± sd)      | (mean ± sd)             |
| 1   | 0 ± 0           | 0e0 ± 0        | 0e0 ± 0          | 0e0 ± 0          | 0e0 ± 0          | 0e0 ± 0                 |
| 2   | 0 ± 0           | 0e0 ± 0        | 0e0 ± 0          | 0e0 ± 0          | 0e0 ± 0          | 0e0 ± 0                 |
| 3   | 0 ± 0           | 0e0 ± 0        | 0e0 ± 0          | 0e0 ± 0          | 0e0 ± 0          | 2 ± 0                   |
| 4   | 11.65 ± 4.66    | 5.4e3 ± 8.8e3  | 2.3 ± 3.7        | 9.3e2 ± 15.1e2   | 9.2 ± 15         | 0e0 ± 0                 |
| 5   | 11.15 ± 13.16   | 6.3e3 ± 9.5e3  | 2.1 ± 3.1        | 6.1e2 ± 11.1e2   | 5.3 ± 9.5        | 5.3e-1 ± 11.1e-1        |
| 6   | 5.85 ± 11.24    | 5.1e3 ± 9.5e3  | 1.4 ± 2.7        | 3.3e2 ± 10.2e2   | 3.5 ± 10.7       | 5.2e-1 ± 11.4e-1        |
| 7   | 2.15 ± 12.62    | 3.8e3 ± 13.6e3 | 8.6e-1 ± 30.4e-1 | 2.2e2 ± 16.2e2   | 1.5 ± 10.7       | 3.7e-1 ± 11.3e-1        |
| 8   | 2.1 ± 12.8      | 3.9e3 ± 20.4e3 | 7.2e-1 ± 37.3e-1 | 3.5e2 ± 23.4e2   | 2 ± 13.8         | 2.3e-1 ± 14.8e-1        |
| 9   | 2 ± 13.08       | 5.4e3 ± 36.7e3 | 8.1e-1 ± 55.9e-1 | 5.8e2 ± 45.9e2   | 3.1 ± 24.3       | 3e-1 ± 20.2e-1          |
| 10  | 2.35 ± 13.92    | 6.1e3 ± 43.2e3 | 7.8e-1 ± 54.9e-1 | 5.9e2 ± 42.8e2   | 2.6 ± 19.2       | 4.5e-1 ± 34.1e-1        |
| 11  | 1.9 ± 13.39     | 6.9e3 ± 48.6e3 | 7.3e-1 ± 51.9e-1 | 6.5e2 ± 46.7e2   | 2.6 ± 18.4       | 4.9e-1 ± 36.9e-1        |
| 12  | 1.95 ± 13.72    | 5e3 ± 36.2e3   | 4.5e-1 ± 32.9e-1 | 2.7e2 ± 20.4e2   | 9.6e-1 ± 72.9e-1 | 5.4e-1 ± 39.2e-1        |
| 13  | 1.9 ± 13.39     | 5.7e3 ± 42.1e3 | 4.4e-1 ± 33.1e-1 | 5.4e2 ± 41.1e2   | 1.8 ± 13.7       | 3.5e-1 ± 26.3e-1        |
| 14  | 2 ± 14.07       | 1e4 ± 7.2e4    | 7e-1 ± 48.9e-1   | 1.3e3 ± 8.9e3    | 3.8 ± 27         | 3.8e-1 ± 28.5e-1        |
| 15  | 2 ± 14.07       | 1.1e4 ± 7.8e4  | 6.6e-1 ± 46.4e-1 | 1e3 ± 7.2e3      | 2.8 ± 20.1       | 6.6e-1 ± 46.5e-1        |
| 16  | 2 ± 14.07       | 9.9e3 ± 70.7e3 | 5.2e-1 ± 37.4e-1 | 7.5e2 ± 54.9e2   | 2 ± 14.9         | 6.7e-1 ± 47.3e-1        |
| 17  | 2 ± 14.07       | 2.1e4 ± 15.2e4 | 1 ± 7.1          | 2.8e3 ± 20.3e3   | 7 ± 50.2         | 5.7e-1 ± 40.6e-1        |
| 18  | 2 ± 14.07       | 2.7e4 ± 19.5e4 | 1.1 ± 8.2        | 2.8e3 ± 20.5e3   | 6.5 ± 47         | 1.18 ± 8.4              |
| 19  | 2 ± 14.07       | 4.8e4 ± 33.9e4 | 1.8 ± 12.8       | 5.9e3 ± 41.6e3   | 1.3e1 ± 9.1e1    | 1.43 ± 10.2             |
| 20  | 2 ± 14.07       | 6.9e4 ± 48.7e4 | 2.4 ± 16.6       | 7.7e3 ± 54.4e3   | 1.6e1 ± 11.4e1   | 2.44 ± 17.2             |
| 21  | 2 ± 14.07       | 7.4e4 ± 52.4e4 | 2.3 ± 16.2       | 6.8e3 ± 48.3e3   | 1.3e1 ± 9.5e1    | 3.36 ± 23.7             |
| 22  | 2 ± 14.07       | 7.9e4 ± 55.7e4 | 2.2 ± 15.8       | 7.1e3 ± 50.9e3   | 1.4e1 ± 9.7e1    | 3.48 ± 24.5             |
| 23  | 2 ± 14.07       | 1e5 ± 7.1e5    | 2.6 ± 18.4       | 1e4 ± 7.5e4      | 1.9e1 ± 13.5e1   | 3.56 ± 25.1             |
| 24  | 2 ± 14.07       | 1.4e5 ± 9.8e5  | 3.3 ± 23.2       | 1.5e4 ± 10.7e4   | 2.5e1 ± 17.7e1   | 4.35 ± 30.8             |
| 25  | 2 ± 14.07       | 1.9e5 ± 13.2e5 | 4.1 ± 28.8       | 2e4 ± 14.4e4     | 3.2e1 ± 23e1     | 5.75 ± 40.5             |
| 26  | 2 ± 14.07       | 1.6e5 ± 11.6e5 | 3.2 ± 23.4       | 1.1e4 ± 10.6e4   | 1.8e1 ± 16.7e1   | 7.43 ± 52.9             |
| 27  | 2 ± 14.07       | 2.9e5 ± 21.1e5 | 5.4 ± 39.5       | 3.6e4 ± 26.2e4   | 5.3e1 ± 38.6e1   | 6.14 ± 44.9             |
| 28  | 2 ± 14.07       | 3.3e5 ± 23.2e5 | 5.7 ± 40.2       | 3.1e4 ± 21.8e4   | 4.3e1 ± 30.6e1   | 1.09e1 ± 7.9e1          |
| 29  | 2 ± 14.07       | 2.9e5 ± 20.9e5 | 4.7 ± 33.7       | 2.2e4 ± 15.9e4   | 2.9e1 ± 21.1e1   | 1.18e1 ± 8.4e1          |
| 30  | 2 ± 14.07       | 4.5e5 ± 33.5e5 | 6.7 ± 50.3       | 5.1e4 ± 39.9e4   | 6.7e1 ± 52.1e1   | 1.02e1 ± 7.2e1          |
| 31  | 2 ± 14.07       | 4.9e5 ± 36.5e5 | 6.9 ± 51.2       | 4.6e4 ± 33.7e4   | 5.7e1 ± 42e1     | 1.5e1 ± 11.3e1          |
| 32  | 2 ± 14.07       | 5.3e5 ± 38e5   | 6.9 ± 49.8       | 4.9e4 ± 34.3e4   | 5.8e1 ± 40.8e1   | 1.59e1 ± 11.8e1         |
| 33  | 2 ± 14.07       | 6.2e5 ± 44.5e5 | 7.6 ± 54.7       | 6e4 ± 43.6e4     | 6.9e1 ± 50.1e1   | 1.65e1 ± 11.9e1         |
| 34  | 2 ± 14.07       | 5.2e5 ± 36.5e5 | 6 ± 42.2         | 3.6e4 ± 28e4     | 4.1e1 ± 31.7e1   | 1.86e1 ± 13.4e1         |
| 35  | 2 ± 14.07       | 5.1e5 ± 36.2e5 | 5.6 ± 39.4       | 4.4e4 ± 30.7e4   | 4.7e1 ± 33.3e1   | 1.51e1 ± 10.6e1         |
| 36  | 2 ± 14.07       | 4.8e5 ± 34.3e5 | 4.9 ± 35.3       | 3.8e4 ± 29.9e4   | 4e1 ± 31.8e1     | 1.45e1 ± 10.2e1         |
| 37  | 2 ± 14.07       | 8.1e5 ± 57.3e5 | 7.9 ± 55.7       | 9.8e4 ± 70e4     | 1e2 ± 7.3e2      | 1.29e1 ± 9.3e1          |

The average of the prevalence, the CFU-values per square meter (cfu/sqm) and per gram manure are calculated over all iterations. The CFU values in the intestine as well as the excreted and ingested quantities are obtained by calculating the average over all animals in one iteration at first and then over all iterations.



**Table S3b (log<sub>10</sub> CFU). Calculated numeric values for the scenario when chicks are set positive with 10<sup>1</sup> CFU bacteria per chick on day 3.** Setting. 20 chicks, 4 seeder, 16 sentinels, Ross 308, target weight 2 kg, feeding duration 36 days, stocking density 39 kg/m<sup>2</sup>, 1000 g litter/m<sup>2</sup>

| day | prevalence in % | cfu/sqm           | cfu/g manure      | cfu in intestine  | cfu/g feces       | cfu ingested per animal |
|-----|-----------------|-------------------|-------------------|-------------------|-------------------|-------------------------|
|     | (% mean ± sd)   | (log10 mean ± sd) | (log10 mean ± sd) | (log10 mean ± sd) | (log10 mean ± sd) | (log10 mean ± sd)       |
| 1   | 0 ± 0           | -Inf ± -Inf       | -Inf ± -Inf       | -Inf ± -Inf       | -Inf ± -Inf       | -Inf ± 0                |
| 2   | 0 ± 0           | -Inf ± -Inf       | -Inf ± -Inf       | -Inf ± -Inf       | -Inf ± -Inf       | -Inf ± 0                |
| 3   | 0 ± 0           | -Inf ± -Inf       | -Inf ± -Inf       | -Inf ± -Inf       | -Inf ± -Inf       | 0.3 ± 0                 |
| 4   | 11.65 ± 4.66    | 3.73 ± 3.95       | 0.36 ± 0.57       | 2.97 ± 3.18       | 0.97 ± 1.18       | -Inf ± 0                |
| 5   | 11.15 ± 13.16   | 3.8 ± 3.98        | 0.32 ± 0.49       | 2.79 ± 3.04       | 0.72 ± 0.98       | -0.28 ± 0.04            |
| 6   | 5.85 ± 11.24    | 3.71 ± 3.98       | 0.15 ± 0.42       | 2.52 ± 3.01       | 0.54 ± 1.03       | -0.28 ± 0.06            |
| 7   | 2.15 ± 12.62    | 3.58 ± 4.13       | -0.07 ± 0.48      | 2.35 ± 3.21       | 0.17 ± 1.03       | -0.43 ± 0.05            |
| 8   | 2.1 ± 12.8      | 3.6 ± 4.31        | -0.14 ± 0.57      | 2.54 ± 3.37       | 0.31 ± 1.14       | -0.64 ± 0.17            |
| 9   | 2 ± 13.08       | 3.73 ± 4.57       | -0.09 ± 0.75      | 2.76 ± 3.66       | 0.49 ± 1.38       | -0.52 ± 0.31            |
| 10  | 2.35 ± 13.92    | 3.79 ± 4.64       | -0.11 ± 0.74      | 2.77 ± 3.63       | 0.42 ± 1.28       | -0.35 ± 0.53            |
| 11  | 1.9 ± 13.39     | 3.84 ± 4.69       | -0.14 ± 0.72      | 2.81 ± 3.67       | 0.41 ± 1.26       | -0.31 ± 0.57            |
| 12  | 1.95 ± 13.72    | 3.7 ± 4.56        | -0.34 ± 0.52      | 2.43 ± 3.31       | -0.02 ± 0.86      | -0.27 ± 0.59            |
| 13  | 1.9 ± 13.39     | 3.75 ± 4.62       | -0.35 ± 0.52      | 2.73 ± 3.61       | 0.26 ± 1.14       | -0.46 ± 0.42            |
| 14  | 2 ± 14.07       | 4.01 ± 4.86       | -0.16 ± 0.69      | 3.1 ± 3.95        | 0.58 ± 1.43       | -0.42 ± 0.46            |
| 15  | 2 ± 14.07       | 4.04 ± 4.89       | -0.18 ± 0.67      | 3.01 ± 3.86       | 0.45 ± 1.3        | -0.18 ± 0.67            |
| 16  | 2 ± 14.07       | 4 ± 4.85          | -0.28 ± 0.57      | 2.88 ± 3.74       | 0.31 ± 1.17       | -0.17 ± 0.67            |
| 17  | 2 ± 14.07       | 4.33 ± 5.18       | 0 ± 0.85          | 3.45 ± 4.31       | 0.84 ± 1.7        | -0.24 ± 0.61            |
| 18  | 2 ± 14.07       | 4.44 ± 5.29       | 0.06 ± 0.91       | 3.45 ± 4.31       | 0.81 ± 1.67       | 0.07 ± 0.92             |
| 19  | 2 ± 14.07       | 4.68 ± 5.53       | 0.26 ± 1.11       | 3.77 ± 4.62       | 1.11 ± 1.96       | 0.16 ± 1.01             |
| 20  | 2 ± 14.07       | 4.84 ± 5.69       | 0.37 ± 1.22       | 3.89 ± 4.74       | 1.21 ± 2.06       | 0.39 ± 1.23             |
| 21  | 2 ± 14.07       | 4.87 ± 5.72       | 0.36 ± 1.21       | 3.83 ± 4.68       | 1.13 ± 1.98       | 0.53 ± 1.38             |
| 22  | 2 ± 14.07       | 4.9 ± 5.75        | 0.35 ± 1.2        | 3.85 ± 4.71       | 1.13 ± 1.98       | 0.54 ± 1.39             |
| 23  | 2 ± 14.07       | 5 ± 5.85          | 0.41 ± 1.26       | 4.02 ± 4.88       | 1.27 ± 2.13       | 0.55 ± 1.4              |
| 24  | 2 ± 14.07       | 5.14 ± 5.99       | 0.52 ± 1.36       | 4.18 ± 5.03       | 1.4 ± 2.25        | 0.64 ± 1.49             |
| 25  | 2 ± 14.07       | 5.27 ± 6.12       | 0.61 ± 1.46       | 4.3 ± 5.16        | 1.5 ± 2.36        | 0.76 ± 1.61             |
| 26  | 2 ± 14.07       | 5.2 ± 6.06        | 0.51 ± 1.37       | 4.05 ± 5.03       | 1.25 ± 2.22       | 0.87 ± 1.72             |
| 27  | 2 ± 14.07       | 5.46 ± 6.32       | 0.74 ± 1.6        | 4.56 ± 5.42       | 1.73 ± 2.59       | 0.79 ± 1.65             |
| 28  | 2 ± 14.07       | 5.51 ± 6.37       | 0.75 ± 1.6        | 4.49 ± 5.34       | 1.64 ± 2.49       | 1.04 ± 1.9              |
| 29  | 2 ± 14.07       | 5.47 ± 6.32       | 0.67 ± 1.53       | 4.35 ± 5.2        | 1.47 ± 2.32       | 1.07 ± 1.92             |
| 30  | 2 ± 14.07       | 5.65 ± 6.53       | 0.83 ± 1.7        | 4.71 ± 5.6        | 1.82 ± 2.72       | 1.01 ± 1.86             |
| 31  | 2 ± 14.07       | 5.69 ± 6.56       | 0.84 ± 1.71       | 4.66 ± 5.53       | 1.75 ± 2.62       | 1.17 ± 2.05             |
| 32  | 2 ± 14.07       | 5.72 ± 6.58       | 0.84 ± 1.7        | 4.69 ± 5.54       | 1.76 ± 2.61       | 1.2 ± 2.07              |
| 33  | 2 ± 14.07       | 5.79 ± 6.65       | 0.88 ± 1.74       | 4.78 ± 5.64       | 1.84 ± 2.7        | 1.22 ± 2.07             |
| 34  | 2 ± 14.07       | 5.71 ± 6.56       | 0.78 ± 1.63       | 4.55 ± 5.45       | 1.61 ± 2.5        | 1.27 ± 2.13             |
| 35  | 2 ± 14.07       | 5.71 ± 6.56       | 0.75 ± 1.6        | 4.64 ± 5.49       | 1.68 ± 2.52       | 1.18 ± 2.03             |
| 36  | 2 ± 14.07       | 5.68 ± 6.54       | 0.69 ± 1.55       | 4.57 ± 5.48       | 1.6 ± 2.5         | 1.16 ± 2.01             |
| 37  | 2 ± 14.07       | 5.91 ± 6.76       | 0.9 ± 1.75        | 4.99 ± 5.84       | 2.01 ± 2.86       | 1.11 ± 1.97             |

The average of the prevalence, the CFU-values per square meter (cfu/sqm) and per gram manure are calculated over all iterations. The CFU values in the intestine as well as the excreted and ingested quantities are obtained by calculating the average over all animals in one iteration at first and then over all iterations. The decadic logarithm of zero or negative values is negative infinite (-Inf).

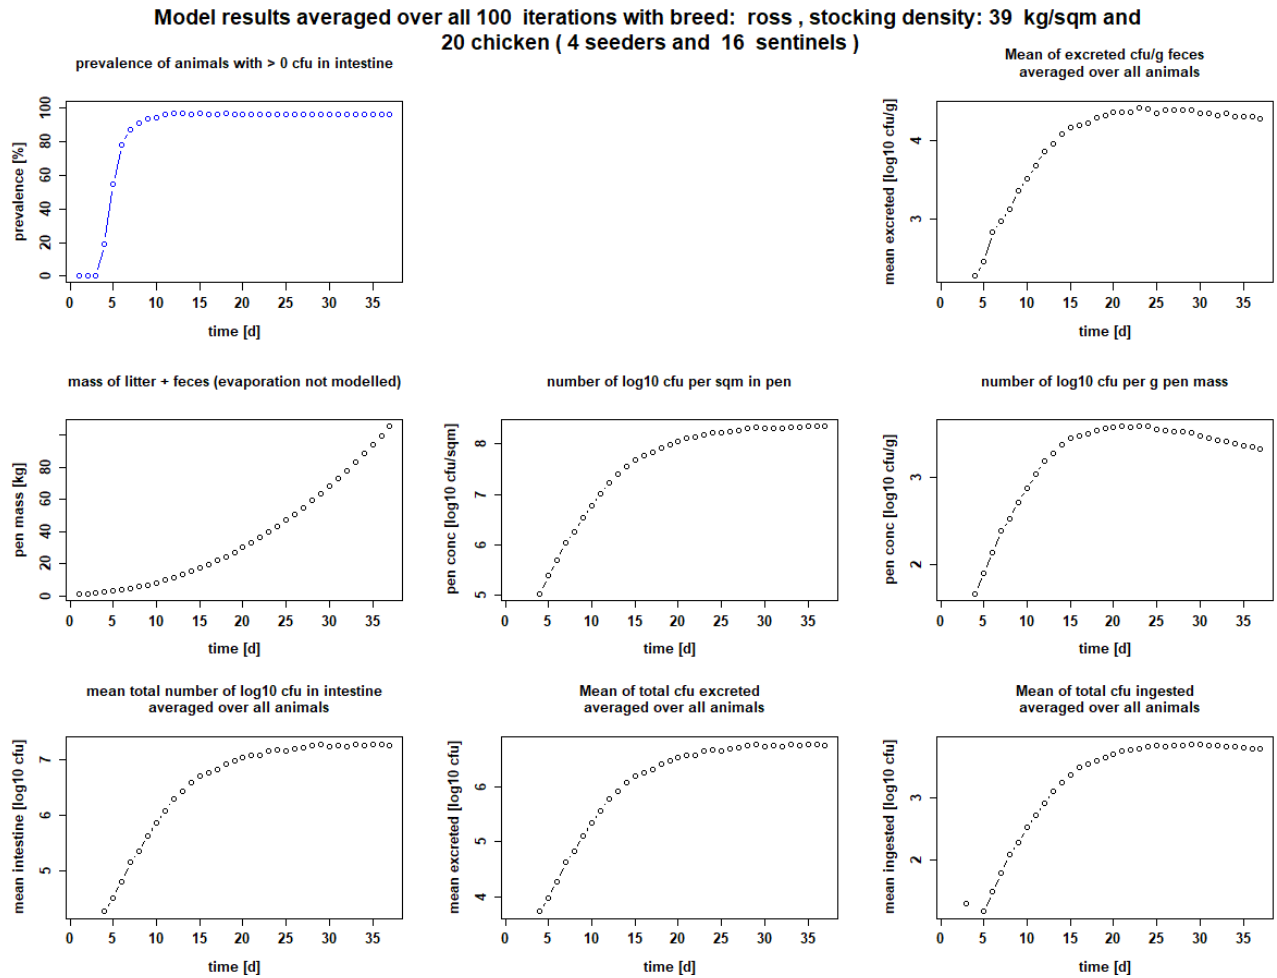

**Figure S4. Calculated infection dynamic for the scenario when chicks are set positive with  $10^2$  CFU bacteria per chick on day 3.** Dotplots with results for 90 chicks, 18 seeder, 72 sentinels, Ross 308, target weight 2.332 kg, feeding duration 36 days, stocking density 39 kg/m<sup>2</sup>, 1000 g litter/m<sup>2</sup>

**Table S4a (CFU). Calculated numeric values for the scenario when chicks are set positive with 10<sup>2</sup> CFU bacteria per chick on day 3.** Setting: 20 chicks, 4 seeder, 16 sentinels, Ross 308, target weight 2 kg, feeding duration 21 days, stocking density 39 kg/m<sup>2</sup>, 1000 g litter/m<sup>2</sup>

| day | prevalence in % | cfu/sqm       | cfu/g manure   | cfu in intestine | cfu/g feces    | cfu ingested per animal |
|-----|-----------------|---------------|----------------|------------------|----------------|-------------------------|
|     | (mean ± sd)     | (mean ± sd)   | (mean ± sd)    | (mean ± sd)      | (mean ± sd)    | (mean ± sd)             |
| 1   | 0 ± 0           | 0e0 ± 0       | 0e0 ± 0        | 0e0 ± 0          | 0e0 ± 0        | 0e0 ± 0                 |
| 2   | 0 ± 0           | 0e0 ± 0       | 0e0 ± 0        | 0e0 ± 0          | 0e0 ± 0        | 0e0 ± 0                 |
| 3   | 0 ± 0           | 0e0 ± 0       | 0e0 ± 0        | 0e0 ± 0          | 0e0 ± 0        | 2e1 ± 0e1               |
| 4   | 19.25 ± 1.93    | 1.1e5 ± 1.4e5 | 4.6e1 ± 6.1e1  | 1.8e4 ± 2.4e4    | 1.8e2 ± 2.4e2  | 0e0 ± 0                 |
| 5   | 54.6 ± 35.63    | 2.4e5 ± 2.9e5 | 8e1 ± 9.4e1    | 3.2e4 ± 3.9e4    | 2.8e2 ± 3.4e2  | 1.49e1 ± 2e1            |
| 6   | 78.25 ± 28.84   | 5e5 ± 6.1e5   | 1.4e2 ± 1.7e2  | 6.4e4 ± 8.3e4    | 6.8e2 ± 8.7e2  | 3.09e1 ± 3.7e1          |
| 7   | 87.55 ± 24.96   | 1.1e6 ± 1.5e6 | 2.4e2 ± 3.4e2  | 1.4e5 ± 2.1e5    | 9.4e2 ± 14.2e2 | 6.16e1 ± 7.6e1          |
| 8   | 90.9 ± 23.17    | 1.8e6 ± 2.8e6 | 3.4e2 ± 5.1e2  | 2.2e5 ± 3.6e5    | 1.3e3 ± 2.1e3  | 1.21e2 ± 1.7e2          |
| 9   | 93.6 ± 18.96    | 3.4e6 ± 5.1e6 | 5.2e2 ± 7.8e2  | 4.3e5 ± 6.7e5    | 2.3e3 ± 3.5e3  | 1.89e2 ± 2.8e2          |
| 10  | 94.75 ± 19.02   | 6e6 ± 9.2e6   | 7.6e2 ± 11.6e2 | 7.3e5 ± 11.7e5   | 3.3e3 ± 5.3e3  | 3.29e2 ± 4.9e2          |
| 11  | 96.1 ± 16.29    | 1e7 ± 1.8e7   | 1.1e3 ± 1.9e3  | 1.2e6 ± 2.3e6    | 4.8e3 ± 9.1e3  | 5.2e2 ± 8e2             |
| 12  | 96.95 ± 14.67   | 1.7e7 ± 3e7   | 1.5e3 ± 2.7e3  | 2e6 ± 3.8e6      | 7.3e3 ± 13.6e3 | 8.21e2 ± 14.2e2         |
| 13  | 96.8 ± 14.69    | 2.5e7 ± 4.1e7 | 1.9e3 ± 3.2e3  | 2.8e6 ± 4.6e6    | 9.2e3 ± 15.2e3 | 1.25e3 ± 2.2e3          |
| 14  | 96.7 ± 15.94    | 3.6e7 ± 5.6e7 | 2.4e3 ± 3.8e3  | 4e6 ± 6.3e6      | 1.2e4 ± 1.9e4  | 1.7e3 ± 2.8e3           |
| 15  | 97.15 ± 14.67   | 4.8e7 ± 6.6e7 | 2.9e3 ± 3.9e3  | 5.2e6 ± 6.8e6    | 1.5e4 ± 1.9e4  | 2.34e3 ± 3.7e3          |
| 16  | 96.6 ± 16.76    | 5.8e7 ± 7.3e7 | 3.1e3 ± 3.9e3  | 5.7e6 ± 7.6e6    | 1.6e4 ± 2.1e4  | 2.99e3 ± 4.1e3          |
| 17  | 96.35 ± 18.02   | 6.8e7 ± 7.8e7 | 3.2e3 ± 3.7e3  | 6.7e6 ± 7.6e6    | 1.7e4 ± 1.9e4  | 3.38e3 ± 4.3e3          |
| 18  | 97 ± 15.08      | 8.4e7 ± 8.9e7 | 3.5e3 ± 3.8e3  | 8.5e6 ± 9.3e6    | 1.9e4 ± 2.1e4  | 3.82e3 ± 4.4e3          |
| 19  | 96.65 ± 16.58   | 9.8e7 ± 9.3e7 | 3.7e3 ± 3.5e3  | 9.6e6 ± 8.9e6    | 2.1e4 ± 2e4    | 4.42e3 ± 4.7e3          |
| 20  | 96.6 ± 16.76    | 1.1e8 ± 1e8   | 3.9e3 ± 3.5e3  | 1.1e7 ± 1e7      | 2.3e4 ± 2.2e4  | 4.96e3 ± 4.7e3          |
| 21  | 96.5 ± 17.27    | 1.3e8 ± 1e8   | 3.9e3 ± 3.1e3  | 1.2e7 ± 0.9e7    | 2.3e4 ± 1.9e4  | 5.52e3 ± 5e3            |
| 22  | 96.55 ± 17.02   | 1.3e8 ± 1e8   | 3.8e3 ± 2.8e3  | 1.2e7 ± 0.9e7    | 2.3e4 ± 1.8e4  | 5.9e3 ± 4.7e3           |
| 23  | 96.45 ± 17.51   | 1.5e8 ± 1e8   | 3.9e3 ± 2.7e3  | 1.4e7 ± 1e7      | 2.6e4 ± 1.8e4  | 6.08e3 ± 4.5e3          |
| 24  | 96.5 ± 17.25    | 1.6e8 ± 1e8   | 3.9e3 ± 2.4e3  | 1.5e7 ± 1e7      | 2.5e4 ± 1.6e4  | 6.61e3 ± 4.5e3          |
| 25  | 96.4 ± 17.75    | 1.7e8 ± 1e8   | 3.6e3 ± 2.2e3  | 1.4e7 ± 1e7      | 2.3e4 ± 1.5e4  | 6.84e3 ± 4.2e3          |
| 26  | 96.55 ± 17.02   | 1.7e8 ± 1e8   | 3.5e3 ± 2e3    | 1.6e7 ± 0.9e7    | 2.5e4 ± 1.5e4  | 6.63e3 ± 4e3            |
| 27  | 96.35 ± 18      | 1.8e8 ± 1e8   | 3.5e3 ± 1.8e3  | 1.7e7 ± 1e7      | 2.5e4 ± 1.4e4  | 6.74e3 ± 3.7e3          |
| 28  | 96.4 ± 17.75    | 2e8 ± 1e8     | 3.4e3 ± 1.7e3  | 1.8e7 ± 1e7      | 2.5e4 ± 1.4e4  | 6.92e3 ± 3.6e3          |
| 29  | 96.4 ± 17.74    | 2.1e8 ± 1e8   | 3.3e3 ± 1.6e3  | 1.9e7 ± 1e7      | 2.5e4 ± 1.3e4  | 7.12e3 ± 3.5e3          |
| 30  | 96.25 ± 18.48   | 2e8 ± 1e8     | 3.1e3 ± 1.4e3  | 1.7e7 ± 1e7      | 2.2e4 ± 1.3e4  | 7.2e3 ± 3.4e3           |
| 31  | 96.5 ± 17.25    | 2.1e8 ± 0.9e8 | 2.9e3 ± 1.3e3  | 1.8e7 ± 0.9e7    | 2.2e4 ± 1.1e4  | 6.85e3 ± 3.2e3          |
| 32  | 96.4 ± 17.74    | 2.1e8 ± 0.9e8 | 2.7e3 ± 1.1e3  | 1.8e7 ± 0.9e7    | 2.1e4 ± 1.1e4  | 6.67e3 ± 2.9e3          |
| 33  | 96.4 ± 17.75    | 2.2e8 ± 0.9e8 | 2.7e3 ± 1.1e3  | 1.9e7 ± 1e7      | 2.2e4 ± 1.1e4  | 6.45e3 ± 2.7e3          |
| 34  | 96.15 ± 19      | 2.1e8 ± 0.9e8 | 2.5e3 ± 1e3    | 1.8e7 ± 0.9e7    | 2e4 ± 1e4      | 6.52e3 ± 2.6e3          |
| 35  | 96.25 ± 18.48   | 2.2e8 ± 0.9e8 | 2.4e3 ± 1e3    | 1.9e7 ± 1e7      | 2.1e4 ± 1.1e4  | 6.23e3 ± 2.5e3          |
| 36  | 96.25 ± 18.51   | 2.2e8 ± 0.9e8 | 2.3e3 ± 0.9e3  | 1.9e7 ± 0.9e7    | 2.1e4 ± 1e4    | 6.14e3 ± 2.5e3          |
| 37  | 96.3 ± 18.25    | 2.2e8 ± 0.9e8 | 2.1e3 ± 0.8e3  | 1.8e7 ± 0.9e7    | 1.9e4 ± 1e4    | 6.04e3 ± 2.4e3          |

The average of the prevalence, the CFU-values per square meter (cfu/sqm) and per gram manure are calculated over all iterations. The CFU values in the intestine as well as the excreted and ingested quantities are obtained by calculating the average over all animals in one iteration at first and then over all iterations.

**Table S4b (log<sub>10</sub> CFU). Calculated numeric values for the scenario when chicks are set positive with 10<sup>2</sup> CFU bacteria per chick on day 3.** Setting: 20 chicks, 4 seeder, 16 sentinels, Ross 308, target weight 2 kg, feeding duration 21 days, stocking density 39 kg/m<sup>2</sup>, 1000 g litter/m<sup>2</sup>

| day | prevalence in % | cfu/sqm           | cfu/g manure      | cfu in intestine  | cfu/g feces       | cfu ingested per animal |
|-----|-----------------|-------------------|-------------------|-------------------|-------------------|-------------------------|
|     | (% mean ± sd)   | (log10 mean ± sd) | (log10 mean ± sd) | (log10 mean ± sd) | (log10 mean ± sd) | (log10 mean ± sd)       |
| 1   | 0 ± 0           | -Inf ± -Inf       | -Inf ± -Inf       | -Inf ± -Inf       | -Inf ± -Inf       | -Inf ± 0                |
| 2   | 0 ± 0           | -Inf ± -Inf       | -Inf ± -Inf       | -Inf ± -Inf       | -Inf ± -Inf       | -Inf ± 0                |
| 3   | 0 ± 0           | -Inf ± -Inf       | -Inf ± -Inf       | -Inf ± -Inf       | -Inf ± -Inf       | 1.3 ± 0                 |
| 4   | 19.25 ± 1.93    | 5.03 ± 5.16       | 1.66 ± 1.78       | 4.27 ± 4.39       | 2.26 ± 2.39       | -Inf ± 0                |
| 5   | 54.6 ± 35.63    | 5.39 ± 5.46       | 1.9 ± 1.97        | 4.51 ± 4.6        | 2.44 ± 2.53       | 1.17 ± 1.31             |
| 6   | 78.25 ± 28.84   | 5.7 ± 5.78        | 2.14 ± 2.23       | 4.81 ± 4.92       | 2.83 ± 2.94       | 1.49 ± 1.57             |
| 7   | 87.55 ± 24.96   | 6.03 ± 6.18       | 2.38 ± 2.53       | 5.15 ± 5.33       | 2.97 ± 3.15       | 1.79 ± 1.88             |
| 8   | 90.9 ± 23.17    | 6.27 ± 6.44       | 2.53 ± 2.71       | 5.35 ± 5.55       | 3.12 ± 3.32       | 2.08 ± 2.23             |
| 9   | 93.6 ± 18.96    | 6.54 ± 6.71       | 2.72 ± 2.89       | 5.63 ± 5.83       | 3.36 ± 3.55       | 2.28 ± 2.45             |
| 10  | 94.75 ± 19.02   | 6.78 ± 6.96       | 2.88 ± 3.07       | 5.86 ± 6.07       | 3.52 ± 3.72       | 2.52 ± 2.69             |
| 11  | 96.1 ± 16.29    | 7.01 ± 7.24       | 3.04 ± 3.27       | 6.09 ± 6.36       | 3.69 ± 3.96       | 2.72 ± 2.9              |
| 12  | 96.95 ± 14.67   | 7.23 ± 7.48       | 3.19 ± 3.44       | 6.31 ± 6.58       | 3.86 ± 4.13       | 2.91 ± 3.15             |
| 13  | 96.8 ± 14.69    | 7.39 ± 7.61       | 3.29 ± 3.51       | 6.44 ± 6.66       | 3.96 ± 4.18       | 3.1 ± 3.35              |
| 14  | 96.7 ± 15.94    | 7.55 ± 7.74       | 3.38 ± 3.58       | 6.6 ± 6.8         | 4.08 ± 4.28       | 3.23 ± 3.45             |
| 15  | 97.15 ± 14.67   | 7.68 ± 7.82       | 3.46 ± 3.59       | 6.72 ± 6.83       | 4.17 ± 4.28       | 3.37 ± 3.56             |
| 16  | 96.6 ± 16.76    | 7.76 ± 7.86       | 3.48 ± 3.59       | 6.76 ± 6.88       | 4.19 ± 4.31       | 3.48 ± 3.61             |
| 17  | 96.35 ± 18.02   | 7.83 ± 7.89       | 3.51 ± 3.57       | 6.83 ± 6.88       | 4.22 ± 4.28       | 3.53 ± 3.63             |
| 18  | 97 ± 15.08      | 7.92 ± 7.95       | 3.54 ± 3.57       | 6.93 ± 6.97       | 4.29 ± 4.33       | 3.58 ± 3.64             |
| 19  | 96.65 ± 16.58   | 7.99 ± 7.97       | 3.57 ± 3.54       | 6.98 ± 6.95       | 4.32 ± 4.29       | 3.65 ± 3.67             |
| 20  | 96.6 ± 16.76    | 8.05 ± 8.01       | 3.59 ± 3.54       | 7.04 ± 7.01       | 4.36 ± 4.33       | 3.7 ± 3.67              |
| 21  | 96.5 ± 17.27    | 8.1 ± 8           | 3.59 ± 3.49       | 7.07 ± 6.98       | 4.37 ± 4.27       | 3.74 ± 3.7              |
| 22  | 96.55 ± 17.02   | 8.13 ± 8          | 3.58 ± 3.45       | 7.09 ± 6.98       | 4.37 ± 4.26       | 3.77 ± 3.67             |
| 23  | 96.45 ± 17.51   | 8.18 ± 8.01       | 3.6 ± 3.43        | 7.16 ± 7          | 4.41 ± 4.26       | 3.78 ± 3.66             |
| 24  | 96.5 ± 17.25    | 8.22 ± 8.01       | 3.59 ± 3.38       | 7.18 ± 6.99       | 4.4 ± 4.21        | 3.82 ± 3.65             |
| 25  | 96.4 ± 17.75    | 8.22 ± 8          | 3.56 ± 3.34       | 7.15 ± 6.98       | 4.36 ± 4.18       | 3.83 ± 3.63             |
| 26  | 96.55 ± 17.02   | 8.24 ± 7.99       | 3.55 ± 3.29       | 7.19 ± 6.97       | 4.39 ± 4.17       | 3.82 ± 3.6              |
| 27  | 96.35 ± 18      | 8.27 ± 7.99       | 3.54 ± 3.26       | 7.22 ± 6.98       | 4.39 ± 4.15       | 3.83 ± 3.57             |
| 28  | 96.4 ± 17.75    | 8.29 ± 7.99       | 3.53 ± 3.22       | 7.25 ± 6.98       | 4.4 ± 4.13        | 3.84 ± 3.56             |
| 29  | 96.4 ± 17.74    | 8.32 ± 7.99       | 3.52 ± 3.2        | 7.27 ± 7.01       | 4.39 ± 4.13       | 3.85 ± 3.54             |
| 30  | 96.25 ± 18.48   | 8.31 ± 7.98       | 3.49 ± 3.16       | 7.23 ± 6.99       | 4.35 ± 4.11       | 3.86 ± 3.53             |
| 31  | 96.5 ± 17.25    | 8.31 ± 7.95       | 3.46 ± 3.1        | 7.25 ± 6.96       | 4.35 ± 4.06       | 3.84 ± 3.51             |
| 32  | 96.4 ± 17.74    | 8.32 ± 7.94       | 3.43 ± 3.05       | 7.25 ± 6.96       | 4.32 ± 4.04       | 3.82 ± 3.46             |
| 33  | 96.4 ± 17.75    | 8.33 ± 7.94       | 3.42 ± 3.03       | 7.29 ± 6.99       | 4.35 ± 4.05       | 3.81 ± 3.43             |
| 34  | 96.15 ± 19      | 8.33 ± 7.93       | 3.39 ± 3          | 7.26 ± 6.95       | 4.31 ± 4.01       | 3.81 ± 3.42             |
| 35  | 96.25 ± 18.48   | 8.34 ± 7.95       | 3.37 ± 2.98       | 7.28 ± 7          | 4.31 ± 4.03       | 3.79 ± 3.4              |
| 36  | 96.25 ± 18.51   | 8.35 ± 7.95       | 3.36 ± 2.96       | 7.29 ± 6.97       | 4.31 ± 4          | 3.79 ± 3.4              |
| 37  | 96.3 ± 18.25    | 8.34 ± 7.94       | 3.33 ± 2.92       | 7.27 ± 6.96       | 4.28 ± 3.98       | 3.78 ± 3.39             |

The average of the prevalence, the CFU-values per square meter (cfu/sqm) and per gram manure are calculated over all iterations. The CFU values in the intestine as well as the excreted and ingested quantities are obtained by calculating the average over all animals in one iteration at first and then over all iterations. The decadic logarithm of zero or negative values is negative infinite (-Inf).

**Model results averaged over all 100 iterations with breed: ross , stocking density: 39 kg/sqm and 20 chicken ( 10 seeders and 10 sentinels )**

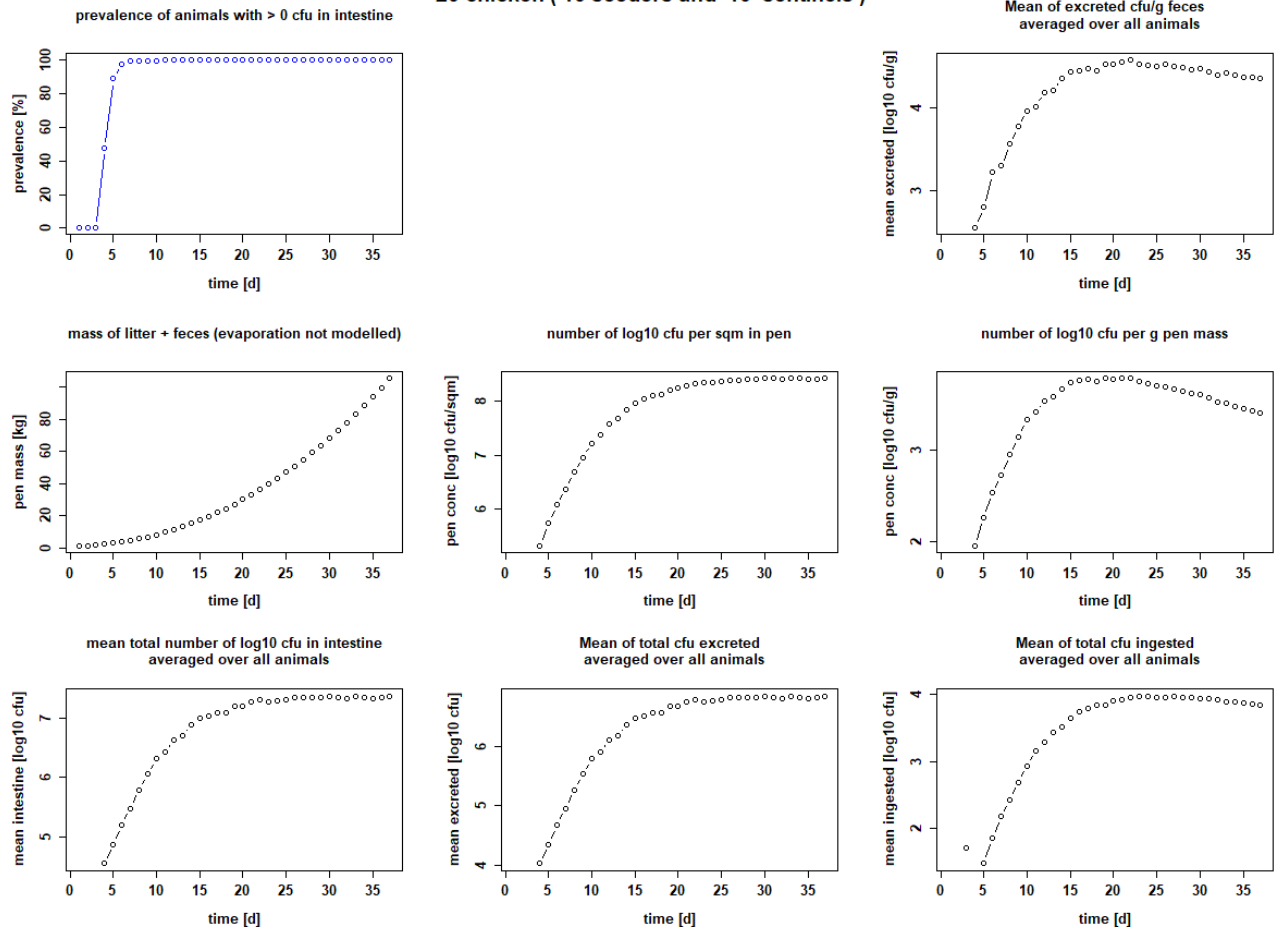

**Figure S5. Calculated infection dynamic for the scenario when day-old chicks are set positive ( $10^2$  CFU bacteria per chick on day 3). Dotplots with results for 20 chicks, 10 seeder, 10 sentinels, Ross 308, target weight 2 kg, feeding duration 36 days, stocking density  $39 \text{ kg/m}^2$ ,  $1000 \text{ g litter/m}^2$**

**Table S5a (CFU). Calculated numeric values for the scenario when chicks are set positive with 10<sup>2</sup> CFU bacteria per chick on day 3.** Setting: 20 chicks, 10 seeder, 10 sentinels, Ross 308, target weight 2 kg, feeding duration 36 days, stocking density 39 kg/m<sup>2</sup>, 1000 g litter/m<sup>2</sup>

| day | prevalence in % | cfu/sqm       | cfu/g manure   | cfu in intestine | cfu/g feces    | cfu ingested per animal |
|-----|-----------------|---------------|----------------|------------------|----------------|-------------------------|
|     | (mean ± sd)     | (mean ± sd)   | (mean ± sd)    | (mean ± sd)      | (mean ± sd)    | (mean ± sd)             |
| 1   | 0 ± 0           | 0e0 ± 0       | 0e0 ± 0        | 0e0 ± 0          | 0e0 ± 0        | 0e0 ± 0                 |
| 2   | 0 ± 0           | 0e0 ± 0       | 0e0 ± 0        | 0e0 ± 0          | 0e0 ± 0        | 0e0 ± 0                 |
| 3   | 0 ± 0           | 0e0 ± 0       | 0e0 ± 0        | 0e0 ± 0          | 0e0 ± 0        | 5e1 ± 0e1               |
| 4   | 47.75 ± 2.79    | 2.1e5 ± 1.7e5 | 8.9e1 ± 7e1    | 3.6e4 ± 2.8e4    | 3.6e2 ± 2.8e2  | 0e0 ± 0                 |
| 5   | 89.1 ± 15.46    | 5.5e5 ± 4.3e5 | 1.8e2 ± 1.4e2  | 7.6e4 ± 6.3e4    | 6.5e2 ± 5.4e2  | 2.95e1 ± 2.4e1          |
| 6   | 97.75 ± 6.29    | 1.2e6 ± 1.3e6 | 3.4e2 ± 3.6e2  | 1.6e5 ± 1.9e5    | 1.7e3 ± 2e3    | 7.03e1 ± 5.6e1          |
| 7   | 99.6 ± 2.09     | 2.4e6 ± 2.6e6 | 5.3e2 ± 5.7e2  | 3e5 ± 3.5e5      | 2e3 ± 2.3e3    | 1.5e2 ± 1.6e2           |
| 8   | 99.85 ± 1.11    | 4.8e6 ± 5.7e6 | 8.8e2 ± 10.5e2 | 6.2e5 ± 8e5      | 3.7e3 ± 4.7e3  | 2.66e2 ± 2.9e2          |
| 9   | 99.95 ± 0.5     | 9e6 ± 12.5e6  | 1.4e3 ± 1.9e3  | 1.1e6 ± 1.7e6    | 6e3 ± 9.1e3    | 4.93e2 ± 5.9e2          |
| 10  | 99.95 ± 0.5     | 1.7e7 ± 2.4e7 | 2.1e3 ± 3.1e3  | 2.1e6 ± 3.2e6    | 9.2e3 ± 14.5e3 | 8.64e2 ± 12e2           |
| 11  | 100 ± 0         | 2.4e7 ± 3.2e7 | 2.5e3 ± 3.4e3  | 2.7e6 ± 3.6e6    | 1e4 ± 1.4e4    | 1.44e3 ± 2.1e3          |
| 12  | 100 ± 0         | 3.7e7 ± 4.6e7 | 3.4e3 ± 4.2e3  | 4.3e6 ± 5.6e6    | 1.5e4 ± 2e4    | 1.92e3 ± 2.6e3          |
| 13  | 100 ± 0         | 4.8e7 ± 4.9e7 | 3.7e3 ± 3.9e3  | 5e6 ± 5.1e6      | 1.7e4 ± 1.7e4  | 2.73e3 ± 3.4e3          |
| 14  | 100 ± 0         | 6.8e7 ± 6.3e7 | 4.6e3 ± 4.3e3  | 7.5e6 ± 7.2e6    | 2.3e4 ± 2.2e4  | 3.29e3 ± 3.4e3          |
| 15  | 100 ± 0         | 9.1e7 ± 7.7e7 | 5.4e3 ± 4.6e3  | 9.8e6 ± 8.4e6    | 2.7e4 ± 2.3e4  | 4.46e3 ± 4.2e3          |
| 16  | 100 ± 0         | 1.1e8 ± 0.8e8 | 5.7e3 ± 4.3e3  | 1.1e7 ± 0.8e7    | 2.9e4 ± 2.1e4  | 5.63e3 ± 4.8e3          |
| 17  | 100 ± 0         | 1.2e8 ± 0.8e8 | 5.8e3 ± 3.8e3  | 1.2e7 ± 0.8e7    | 3e4 ± 2e4      | 6.26e3 ± 4.7e3          |
| 18  | 100 ± 0         | 1.3e8 ± 0.8e8 | 5.6e3 ± 3.3e3  | 1.2e7 ± 0.8e7    | 2.8e4 ± 1.9e4  | 6.9e3 ± 4.5e3           |
| 19  | 100 ± 0         | 1.6e8 ± 0.9e8 | 6e3 ± 3.3e3    | 1.6e7 ± 0.9e7    | 3.4e4 ± 2e4    | 7.05e3 ± 4.2e3          |
| 20  | 100 ± 0         | 1.7e8 ± 0.9e8 | 5.9e3 ± 3e3    | 1.6e7 ± 0.9e7    | 3.3e4 ± 2e4    | 8.02e3 ± 4.4e3          |
| 21  | 100 ± 0         | 1.9e8 ± 0.9e8 | 6e3 ± 2.7e3    | 1.8e7 ± 0.9e7    | 3.6e4 ± 1.9e4  | 8.38e3 ± 4.2e3          |
| 22  | 100 ± 0         | 2.1e8 ± 1e8   | 6e3 ± 2.7e3    | 2e7 ± 1.1e7      | 3.8e4 ± 2.1e4  | 9.04e3 ± 4.1e3          |
| 23  | 100 ± 0         | 2.2e8 ± 0.9e8 | 5.6e3 ± 2.3e3  | 1.9e7 ± 1e7      | 3.4e4 ± 1.7e4  | 9.58e3 ± 4.4e3          |
| 24  | 100 ± 0         | 2.2e8 ± 0.8e8 | 5.3e3 ± 1.9e3  | 2e7 ± 0.9e7      | 3.2e4 ± 1.5e4  | 9.38e3 ± 3.9e3          |
| 25  | 100 ± 0         | 2.3e8 ± 0.8e8 | 5e3 ± 1.7e3    | 2e7 ± 0.9e7      | 3.2e4 ± 1.4e4  | 9.23e3 ± 3.3e3          |
| 26  | 100 ± 0         | 2.4e8 ± 0.8e8 | 4.8e3 ± 1.5e3  | 2.1e7 ± 0.9e7    | 3.4e4 ± 1.4e4  | 9.16e3 ± 3.1e3          |
| 27  | 100 ± 0         | 2.4e8 ± 0.7e8 | 4.6e3 ± 1.3e3  | 2.1e7 ± 0.9e7    | 3.1e4 ± 1.3e4  | 9.28e3 ± 3e3            |
| 28  | 100 ± 0         | 2.5e8 ± 0.8e8 | 4.3e3 ± 1.4e3  | 2.2e7 ± 0.9e7    | 3.1e4 ± 1.3e4  | 9.16e3 ± 2.7e3          |
| 29  | 100 ± 0         | 2.5e8 ± 0.7e8 | 4.1e3 ± 1.2e3  | 2.2e7 ± 0.8e7    | 2.9e4 ± 1.1e4  | 9.05e3 ± 2.8e3          |
| 30  | 100 ± 0         | 2.6e8 ± 0.8e8 | 3.9e3 ± 1.2e3  | 2.3e7 ± 1e7      | 3e4 ± 1.2e4    | 8.82e3 ± 2.5e3          |
| 31  | 100 ± 0         | 2.6e8 ± 0.7e8 | 3.6e3 ± 1e3    | 2.2e7 ± 0.8e7    | 2.7e4 ± 1e4    | 8.82e3 ± 2.6e3          |
| 32  | 100 ± 0         | 2.5e8 ± 0.7e8 | 3.3e3 ± 0.9e3  | 2.1e7 ± 0.9e7    | 2.5e4 ± 1.1e4  | 8.39e3 ± 2.2e3          |
| 33  | 100 ± 0         | 2.6e8 ± 0.7e8 | 3.2e3 ± 0.9e3  | 2.3e7 ± 1e7      | 2.6e4 ± 1.2e4  | 7.91e3 ± 2.2e3          |
| 34  | 100 ± 0         | 2.6e8 ± 0.7e8 | 3e3 ± 0.8e3    | 2.2e7 ± 0.9e7    | 2.5e4 ± 1e4    | 7.87e3 ± 2.2e3          |
| 35  | 100 ± 0         | 2.5e8 ± 0.6e8 | 2.8e3 ± 0.6e3  | 2.1e7 ± 0.8e7    | 2.3e4 ± 0.8e4  | 7.51e3 ± 2e3            |
| 36  | 100 ± 0         | 2.6e8 ± 0.6e8 | 2.6e3 ± 0.7e3  | 2.2e7 ± 0.9e7    | 2.3e4 ± 0.9e4  | 7.15e3 ± 1.6e3          |
| 37  | 100 ± 0         | 2.6e8 ± 0.6e8 | 2.5e3 ± 0.6e3  | 2.2e7 ± 0.9e7    | 2.3e4 ± 0.9e4  | 6.95e3 ± 1.8e3          |

The average of the prevalence, the CFU-values per square meter (cfu/sqm) and per gram manure are calculated over all iterations. The CFU values in the intestine as well as the excreted and ingested quantities are obtained by calculating the average over all animals in one iteration at first and then over all iterations.

**Table S5b (log<sub>10</sub> CFU). Calculated numeric values for the scenario when chicks are set positive with 10<sup>2</sup> CFU bacteria per chick on day 3.** Setting: 20 chicks, 10 seeder, 10 sentinels, Ross 308, target weight 2 kg, feeding duration 36 days, stocking density 39 kg/m<sup>2</sup>, 1000 g litter/m<sup>2</sup>

| day | prevalence in % | cfu/sqm           | cfu/g manure      | cfu in intestine  | cfu/g feces       | cfu ingested per animal |
|-----|-----------------|-------------------|-------------------|-------------------|-------------------|-------------------------|
|     | (% mean ± sd)   | (log10 mean ± sd) | (log10 mean ± sd) | (log10 mean ± sd) | (log10 mean ± sd) | (log10 mean ± sd)       |
| 1   | 0 ± 0           | -Inf ± -Inf       | -Inf ± -Inf       | -Inf ± -Inf       | -Inf ± -Inf       | -Inf ± 0                |
| 2   | 0 ± 0           | -Inf ± -Inf       | -Inf ± -Inf       | -Inf ± -Inf       | -Inf ± -Inf       | -Inf ± 0                |
| 3   | 0 ± 0           | -Inf ± -Inf       | -Inf ± -Inf       | -Inf ± -Inf       | -Inf ± -Inf       | 1.7 ± 0                 |
| 4   | 47.75 ± 2.79    | 5.32 ± 5.22       | 1.95 ± 1.85       | 4.56 ± 4.45       | 2.56 ± 2.45       | -Inf ± 0                |
| 5   | 89.1 ± 15.46    | 5.74 ± 5.64       | 2.26 ± 2.15       | 4.88 ± 4.8        | 2.81 ± 2.73       | 1.47 ± 1.37             |
| 6   | 97.75 ± 6.29    | 6.08 ± 6.11       | 2.53 ± 2.55       | 5.2 ± 5.28        | 3.22 ± 3.3        | 1.85 ± 1.75             |
| 7   | 99.6 ± 2.09     | 6.37 ± 6.41       | 2.72 ± 2.76       | 5.48 ± 5.54       | 3.3 ± 3.36        | 2.18 ± 2.2              |
| 8   | 99.85 ± 1.11    | 6.68 ± 6.76       | 2.94 ± 3.02       | 5.79 ± 5.9        | 3.56 ± 3.67       | 2.43 ± 2.46             |
| 9   | 99.95 ± 0.5     | 6.96 ± 7.1        | 3.14 ± 3.28       | 6.05 ± 6.23       | 3.78 ± 3.96       | 2.69 ± 2.77             |
| 10  | 99.95 ± 0.5     | 7.22 ± 7.39       | 3.32 ± 3.49       | 6.31 ± 6.51       | 3.97 ± 4.16       | 2.94 ± 3.08             |
| 11  | 100 ± 0         | 7.38 ± 7.51       | 3.41 ± 3.54       | 6.43 ± 6.55       | 4.02 ± 4.15       | 3.16 ± 3.33             |
| 12  | 100 ± 0         | 7.57 ± 7.66       | 3.53 ± 3.62       | 6.63 ± 6.75       | 4.19 ± 4.3        | 3.28 ± 3.41             |
| 13  | 100 ± 0         | 7.68 ± 7.69       | 3.57 ± 3.59       | 6.7 ± 6.71        | 4.22 ± 4.23       | 3.44 ± 3.53             |
| 14  | 100 ± 0         | 7.83 ± 7.8        | 3.66 ± 3.63       | 6.88 ± 6.86       | 4.36 ± 4.34       | 3.52 ± 3.53             |
| 15  | 100 ± 0         | 7.96 ± 7.89       | 3.74 ± 3.66       | 6.99 ± 6.92       | 4.44 ± 4.37       | 3.65 ± 3.62             |
| 16  | 100 ± 0         | 8.03 ± 7.91       | 3.75 ± 3.63       | 7.02 ± 6.9        | 4.46 ± 4.33       | 3.75 ± 3.68             |
| 17  | 100 ± 0         | 8.09 ± 7.91       | 3.76 ± 3.58       | 7.08 ± 6.91       | 4.47 ± 4.31       | 3.8 ± 3.67              |
| 18  | 100 ± 0         | 8.12 ± 7.9        | 3.75 ± 3.52       | 7.09 ± 6.91       | 4.45 ± 4.27       | 3.84 ± 3.65             |
| 19  | 100 ± 0         | 8.2 ± 7.94        | 3.78 ± 3.51       | 7.19 ± 6.97       | 4.53 ± 4.31       | 3.85 ± 3.62             |
| 20  | 100 ± 0         | 8.24 ± 7.94       | 3.77 ± 3.47       | 7.2 ± 6.97        | 4.52 ± 4.3        | 3.9 ± 3.64              |
| 21  | 100 ± 0         | 8.29 ± 7.95       | 3.78 ± 3.44       | 7.26 ± 6.98       | 4.56 ± 4.27       | 3.92 ± 3.63             |
| 22  | 100 ± 0         | 8.33 ± 7.99       | 3.78 ± 3.44       | 7.3 ± 7.04        | 4.57 ± 4.32       | 3.96 ± 3.62             |
| 23  | 100 ± 0         | 8.33 ± 7.95       | 3.75 ± 3.36       | 7.27 ± 6.98       | 4.53 ± 4.24       | 3.98 ± 3.64             |
| 24  | 100 ± 0         | 8.35 ± 7.9        | 3.72 ± 3.28       | 7.29 ± 6.96       | 4.51 ± 4.18       | 3.97 ± 3.59             |
| 25  | 100 ± 0         | 8.36 ± 7.89       | 3.7 ± 3.23        | 7.3 ± 6.94        | 4.51 ± 4.15       | 3.97 ± 3.52             |
| 26  | 100 ± 0         | 8.38 ± 7.88       | 3.68 ± 3.19       | 7.33 ± 6.95       | 4.53 ± 4.14       | 3.96 ± 3.5              |
| 27  | 100 ± 0         | 8.39 ± 7.86       | 3.66 ± 3.13       | 7.33 ± 6.93       | 4.5 ± 4.1         | 3.97 ± 3.47             |
| 28  | 100 ± 0         | 8.4 ± 7.9         | 3.64 ± 3.13       | 7.34 ± 6.98       | 4.49 ± 4.12       | 3.96 ± 3.43             |
| 29  | 100 ± 0         | 8.4 ± 7.86        | 3.61 ± 3.06       | 7.34 ± 6.92       | 4.47 ± 4.05       | 3.96 ± 3.45             |
| 30  | 100 ± 0         | 8.42 ± 7.89       | 3.6 ± 3.07        | 7.36 ± 6.98       | 4.48 ± 4.1        | 3.95 ± 3.4              |
| 31  | 100 ± 0         | 8.41 ± 7.84       | 3.56 ± 2.99       | 7.34 ± 6.9        | 4.43 ± 3.99       | 3.95 ± 3.42             |
| 32  | 100 ± 0         | 8.4 ± 7.85        | 3.52 ± 2.97       | 7.33 ± 6.95       | 4.4 ± 4.02        | 3.92 ± 3.35             |
| 33  | 100 ± 0         | 8.42 ± 7.87       | 3.51 ± 2.96       | 7.36 ± 7.01       | 4.42 ± 4.07       | 3.9 ± 3.35              |
| 34  | 100 ± 0         | 8.41 ± 7.83       | 3.47 ± 2.89       | 7.34 ± 6.94       | 4.39 ± 4          | 3.9 ± 3.35              |
| 35  | 100 ± 0         | 8.4 ± 7.76        | 3.44 ± 2.79       | 7.33 ± 6.88       | 4.36 ± 3.92       | 3.88 ± 3.29             |
| 36  | 100 ± 0         | 8.41 ± 7.81       | 3.42 ± 2.82       | 7.34 ± 6.95       | 4.37 ± 3.97       | 3.85 ± 3.21             |
| 37  | 100 ± 0         | 8.41 ± 7.81       | 3.4 ± 2.8         | 7.35 ± 6.95       | 4.36 ± 3.96       | 3.84 ± 3.24             |

The average of the prevalence, the CFU-values per square meter (cfu/sqm) and per gram manure are calculated over all iterations. The CFU values in the intestine as well as the excreted and ingested quantities are obtained by calculating the average over all animals in one iteration at first and then over all iterations. The decadic logarithm of zero or negative values is negative infinite (-Inf).

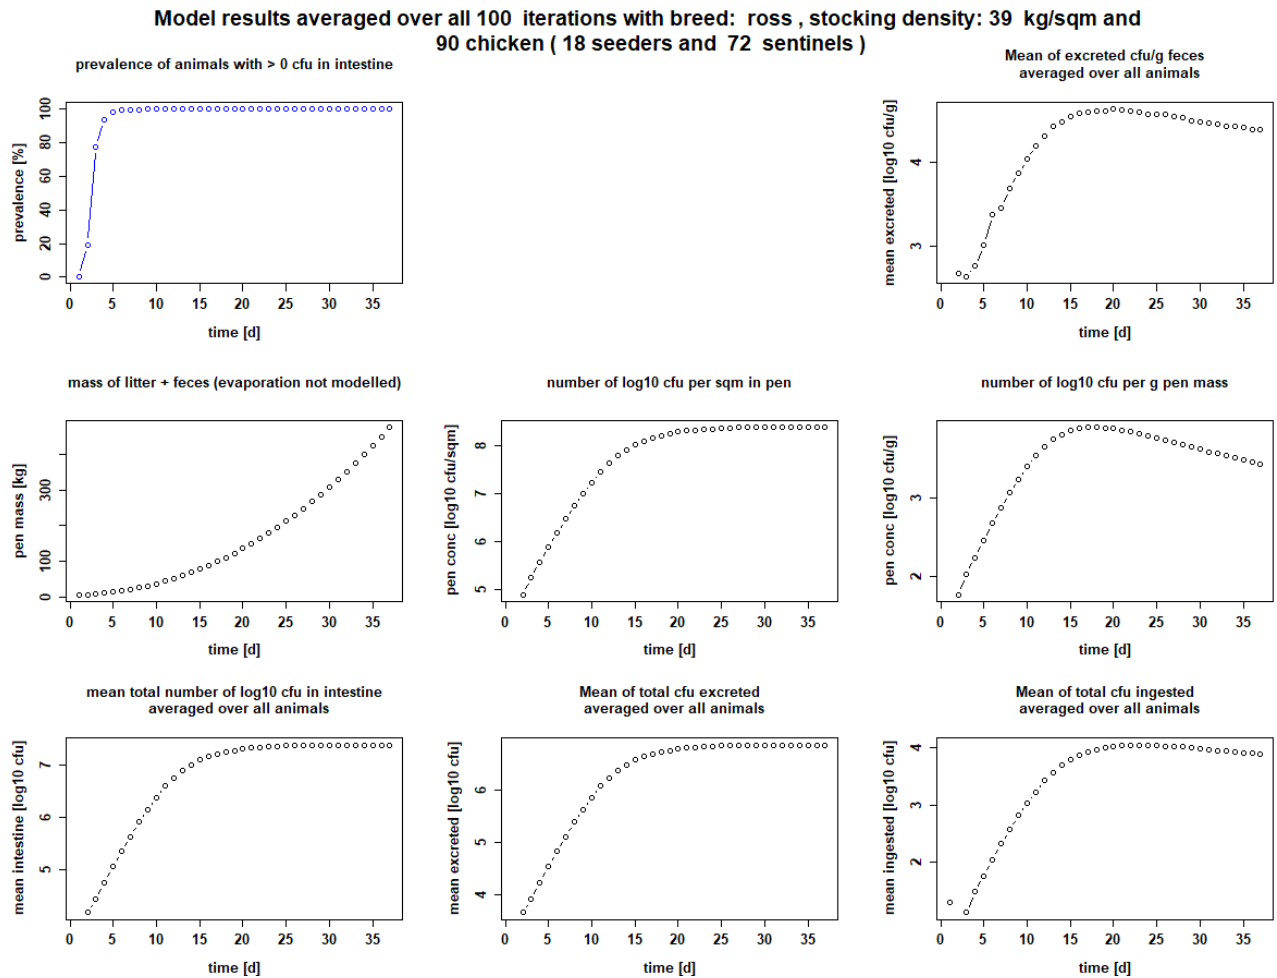

**Figure S6. Calculated infection dynamic when day-old chicks are set positive ( $10^2$  CFU bacteria per chick on day 1; reference).** Dotplots with results for 90 chicks, 18 seeder, 72 sentinels, Ross 308, feeding duration 36 days, stocking density 39 kg/m<sup>2</sup>, litter 1000g/m<sup>2</sup>



**Table S6a (CFU). Calculated numeric values for scenario when day-old chicks are set positive positive (102 CFU bacteria per chick on day 1; reference). Setting 18 seeder, 72 sentinels, Ross 308, feeding duration 36 days, stocking density 39 kg/m<sup>2</sup>, litter 1000 g/m<sup>2</sup>**

| day | prevalence in % | cfu/sqm       | cfu/g manure  | cfu in intestine | cfu/g feces   | cfu ingested per animal |
|-----|-----------------|---------------|---------------|------------------|---------------|-------------------------|
|     | (mean ± sd)     | (mean ± sd)   | (mean ± sd)   | (mean ± sd)      | (mean ± sd)   | (mean ± sd)             |
| 1   | 0 ± 0           | 0e0 ± 0       | 0e0 ± 0       | 0e0 ± 0          | 0e0 ± 0       | 2e1 ± 0e1               |
| 2   | 19.23 ± 1.03    | 7.8e4 ± 4.9e4 | 5.8e1 ± 3.7e1 | 1.6e4 ± 1e4      | 4.7e2 ± 3e2   | 0e0 ± 0                 |
| 3   | 77.7 ± 21.9     | 1.8e5 ± 1e5   | 1.1e2 ± 0.6e2 | 2.7e4 ± 1.7e4    | 4.3e2 ± 2.6e2 | 1.34e1 ± 0.9e1          |
| 4   | 94.03 ± 9.78    | 3.8e5 ± 2.3e5 | 1.7e2 ± 1e2   | 5.7e4 ± 3.6e4    | 5.7e2 ± 3.5e2 | 3.08e1 ± 1.8e1          |
| 5   | 98.07 ± 5.05    | 7.8e5 ± 4.8e5 | 2.8e2 ± 1.7e2 | 1.2e5 ± 0.7e5    | 1e3 ± 0.6e3   | 5.8e1 ± 3.5e1           |
| 6   | 99.38 ± 1.98    | 1.5e6 ± 1e6   | 4.7e2 ± 3.1e2 | 2.3e5 ± 1.5e5    | 2.4e3 ± 1.6e3 | 1.11e2 ± 0.7e2          |
| 7   | 99.87 ± 0.69    | 2.9e6 ± 2.2e6 | 7.4e2 ± 5.5e2 | 4.3e5 ± 3.5e5    | 2.9e3 ± 2.3e3 | 2.12e2 ± 1.4e2          |
| 8   | 99.98 ± 0.16    | 5.6e6 ± 4.6e6 | 1.2e3 ± 1e3   | 8.3e5 ± 7.1e5    | 4.9e3 ± 4.2e3 | 3.72e2 ± 2.8e2          |
| 9   | 100 ± 0         | 9.9e6 ± 8e6   | 1.7e3 ± 1.4e3 | 1.4e6 ± 1.2e6    | 7.5e3 ± 6.3e3 | 6.54e2 ± 5.3e2          |
| 10  | 100 ± 0         | 1.7e7 ± 1.3e7 | 2.5e3 ± 1.9e3 | 2.4e6 ± 1.9e6    | 1.1e4 ± 0.9e4 | 1.08e3 ± 0.9e3          |
| 11  | 100 ± 0         | 2.9e7 ± 2.3e7 | 3.5e3 ± 2.8e3 | 4e6 ± 3.2e6      | 1.6e4 ± 1.3e4 | 1.69e3 ± 1.3e3          |
| 12  | 100 ± 0         | 4.3e7 ± 3.1e7 | 4.5e3 ± 3.2e3 | 5.8e6 ± 4.1e6    | 2.1e4 ± 1.5e4 | 2.65e3 ± 2.1e3          |
| 13  | 100 ± 0         | 6.2e7 ± 4.1e7 | 5.6e3 ± 3.7e3 | 8e6 ± 5.3e6      | 2.7e4 ± 1.8e4 | 3.67e3 ± 2.6e3          |
| 14  | 100 ± 0         | 8.2e7 ± 4.8e7 | 6.4e3 ± 3.8e3 | 1e7 ± 0.6e7      | 3.1e4 ± 1.8e4 | 4.93e3 ± 3.2e3          |
| 15  | 100 ± 0         | 1e8 ± 0.6e8   | 7.1e3 ± 3.8e3 | 1.2e7 ± 0.7e7    | 3.5e4 ± 1.9e4 | 6.2e3 ± 3.6e3           |
| 16  | 100 ± 0         | 1.2e8 ± 0.6e8 | 7.6e3 ± 3.5e3 | 1.4e7 ± 0.6e7    | 3.9e4 ± 1.7e4 | 7.39e3 ± 4e3            |
| 17  | 100 ± 0         | 1.4e8 ± 0.6e8 | 7.8e3 ± 3.2e3 | 1.6e7 ± 0.7e7    | 4e4 ± 1.6e4   | 8.4e3 ± 3.9e3           |
| 18  | 100 ± 0         | 1.6e8 ± 0.6e8 | 7.9e3 ± 3e3   | 1.8e7 ± 0.7e7    | 4.2e4 ± 1.6e4 | 9.28e3 ± 3.8e3          |
| 19  | 100 ± 0         | 1.8e8 ± 0.6e8 | 7.7e3 ± 2.5e3 | 1.9e7 ± 0.6e7    | 4.1e4 ± 1.3e4 | 9.96e3 ± 3.7e3          |
| 20  | 100 ± 0         | 1.9e8 ± 0.5e8 | 7.6e3 ± 2e3   | 2.1e7 ± 0.6e7    | 4.3e4 ± 1.2e4 | 1.03e4 ± 0.3e4          |
| 21  | 100 ± 0         | 2e8 ± 0.5e8   | 7.3e3 ± 1.8e3 | 2.1e7 ± 0.5e7    | 4.2e4 ± 1.1e4 | 1.08e4 ± 0.3e4          |
| 22  | 100 ± 0         | 2.1e8 ± 0.5e8 | 6.9e3 ± 1.5e3 | 2.2e7 ± 0.5e7    | 4.2e4 ± 1e4   | 1.1e4 ± 0.3e4           |
| 23  | 100 ± 0         | 2.2e8 ± 0.4e8 | 6.6e3 ± 1.2e3 | 2.3e7 ± 0.5e7    | 4e4 ± 0.8e4   | 1.11e4 ± 0.2e4          |
| 24  | 100 ± 0         | 2.2e8 ± 0.4e8 | 6.1e3 ± 1.1e3 | 2.2e7 ± 0.5e7    | 3.7e4 ± 0.8e4 | 1.1e4 ± 0.2e4           |
| 25  | 100 ± 0         | 2.3e8 ± 0.4e8 | 5.8e3 ± 1e3   | 2.3e7 ± 0.5e7    | 3.7e4 ± 0.8e4 | 1.07e4 ± 0.2e4          |
| 26  | 100 ± 0         | 2.3e8 ± 0.4e8 | 5.5e3 ± 0.9e3 | 2.4e7 ± 0.5e7    | 3.7e4 ± 0.8e4 | 1.06e4 ± 0.2e4          |
| 27  | 100 ± 0         | 2.4e8 ± 0.4e8 | 5.1e3 ± 0.8e3 | 2.4e7 ± 0.4e7    | 3.5e4 ± 0.6e4 | 1.05e4 ± 0.2e4          |
| 28  | 100 ± 0         | 2.4e8 ± 0.3e8 | 4.8e3 ± 0.7e3 | 2.4e7 ± 0.4e7    | 3.4e4 ± 0.6e4 | 1.03e4 ± 0.2e4          |
| 29  | 100 ± 0         | 2.4e8 ± 0.3e8 | 4.5e3 ± 0.6e3 | 2.4e7 ± 0.4e7    | 3.2e4 ± 0.6e4 | 1.01e4 ± 0.1e4          |
| 30  | 100 ± 0         | 2.4e8 ± 0.3e8 | 4.1e3 ± 0.6e3 | 2.3e7 ± 0.4e7    | 3.1e4 ± 0.6e4 | 9.67e3 ± 1.3e3          |
| 31  | 100 ± 0         | 2.4e8 ± 0.3e8 | 3.9e3 ± 0.5e3 | 2.3e7 ± 0.5e7    | 2.9e4 ± 0.6e4 | 9.29e3 ± 1.2e3          |
| 32  | 100 ± 0         | 2.4e8 ± 0.3e8 | 3.6e3 ± 0.5e3 | 2.4e7 ± 0.4e7    | 2.9e4 ± 0.5e4 | 8.92e3 ± 1.2e3          |
| 33  | 100 ± 0         | 2.4e8 ± 0.3e8 | 3.4e3 ± 0.4e3 | 2.4e7 ± 0.4e7    | 2.7e4 ± 0.5e4 | 8.67e3 ± 1.1e3          |
| 34  | 100 ± 0         | 2.4e8 ± 0.3e8 | 3.2e3 ± 0.4e3 | 2.4e7 ± 0.4e7    | 2.7e4 ± 0.5e4 | 8.35e3 ± 1e3            |
| 35  | 100 ± 0         | 2.4e8 ± 0.3e8 | 3.1e3 ± 0.3e3 | 2.4e7 ± 0.4e7    | 2.6e4 ± 0.4e4 | 8.1e3 ± 1e3             |
| 36  | 100 ± 0         | 2.4e8 ± 0.3e8 | 2.9e3 ± 0.3e3 | 2.3e7 ± 0.4e7    | 2.5e4 ± 0.4e4 | 7.91e3 ± 0.9e3          |
| 37  | 100 ± 0         | 2.4e8 ± 0.3e8 | 2.7e3 ± 0.3e3 | 2.4e7 ± 0.4e7    | 2.5e4 ± 0.4e4 | 7.54e3 ± 0.8e3          |

The average of the prevalence, the CFU-values per square meter (cfu/sqm) and per gram manure are calculated over all iterations. The CFU values in the intestine as well as the excreted and ingested quantities are obtained by calculating the average over all animals in one iteration at first and then over all iterations.

**Table S6b (log<sub>10</sub> CFU). Calculated numeric values for scenario when day-old chicks are set positive positive (10<sup>2</sup> CFU bacteria per chick on day 1; reference). Setting: 18 seeder, 72 sentinels, Ross 308, feeding duration 36 days, stocking density 39 kg/m<sup>2</sup>, litter 1000 g/m<sup>2</sup>**

| day | prevalence in % | cfu/sqm           | cfu/g manure      | cfu in intestine  | cfu/g feces       | cfu ingested per animal |
|-----|-----------------|-------------------|-------------------|-------------------|-------------------|-------------------------|
|     | (% mean ± sd)   | (log10 mean ± sd) | (log10 mean ± sd) | (log10 mean ± sd) | (log10 mean ± sd) | (log10 mean ± sd)       |
| 1   | 0 ± 0           | -Inf ± -Inf       | -Inf ± -Inf       | -Inf ± -Inf       | -Inf ± -Inf       | 1.3 ± 0                 |
| 2   | 19.23 ± 1.03    | 4.89 ± 4.69       | 1.77 ± 1.57       | 4.19 ± 3.99       | 2.67 ± 2.47       | -Inf ± 0                |
| 3   | 77.7 ± 21.9     | 5.25 ± 5.02       | 2.03 ± 1.8        | 4.44 ± 4.22       | 2.63 ± 2.41       | 1.13 ± 0.94             |
| 4   | 94.03 ± 9.78    | 5.58 ± 5.35       | 2.24 ± 2.02       | 4.76 ± 4.55       | 2.76 ± 2.55       | 1.49 ± 1.27             |
| 5   | 98.07 ± 5.05    | 5.89 ± 5.68       | 2.45 ± 2.24       | 5.07 ± 4.87       | 3.01 ± 2.8        | 1.76 ± 1.54             |
| 6   | 99.38 ± 1.98    | 6.18 ± 5.99       | 2.68 ± 2.48       | 5.36 ± 5.19       | 3.38 ± 3.21       | 2.05 ± 1.83             |
| 7   | 99.87 ± 0.69    | 6.47 ± 6.34       | 2.87 ± 2.74       | 5.64 ± 5.54       | 3.46 ± 3.36       | 2.33 ± 2.14             |
| 8   | 99.98 ± 0.16    | 6.75 ± 6.66       | 3.07 ± 2.98       | 5.92 ± 5.85       | 3.69 ± 3.62       | 2.57 ± 2.44             |
| 9   | 100 ± 0         | 7 ± 6.91          | 3.23 ± 3.14       | 6.15 ± 6.07       | 3.87 ± 3.8        | 2.82 ± 2.73             |
| 10  | 100 ± 0         | 7.23 ± 7.12       | 3.39 ± 3.29       | 6.38 ± 6.28       | 4.03 ± 3.93       | 3.03 ± 2.94             |
| 11  | 100 ± 0         | 7.46 ± 7.35       | 3.54 ± 3.44       | 6.6 ± 6.51        | 4.2 ± 4.11        | 3.23 ± 3.12             |
| 12  | 100 ± 0         | 7.64 ± 7.49       | 3.65 ± 3.51       | 6.76 ± 6.61       | 4.31 ± 4.16       | 3.42 ± 3.32             |
| 13  | 100 ± 0         | 7.79 ± 7.61       | 3.75 ± 3.57       | 6.9 ± 6.72        | 4.43 ± 4.24       | 3.56 ± 3.42             |
| 14  | 100 ± 0         | 7.91 ± 7.68       | 3.81 ± 3.57       | 7.01 ± 6.77       | 4.49 ± 4.25       | 3.69 ± 3.51             |
| 15  | 100 ± 0         | 8.02 ± 7.74       | 3.85 ± 3.58       | 7.1 ± 6.82        | 4.54 ± 4.27       | 3.79 ± 3.56             |
| 16  | 100 ± 0         | 8.09 ± 7.76       | 3.88 ± 3.54       | 7.16 ± 6.8        | 4.59 ± 4.23       | 3.87 ± 3.6              |
| 17  | 100 ± 0         | 8.16 ± 7.77       | 3.89 ± 3.51       | 7.21 ± 6.82       | 4.6 ± 4.21        | 3.92 ± 3.59             |
| 18  | 100 ± 0         | 8.21 ± 7.79       | 3.9 ± 3.47        | 7.26 ± 6.84       | 4.62 ± 4.2        | 3.97 ± 3.58             |
| 19  | 100 ± 0         | 8.25 ± 7.75       | 3.89 ± 3.39       | 7.28 ± 6.76       | 4.62 ± 4.1        | 4 ± 3.57                |
| 20  | 100 ± 0         | 8.28 ± 7.71       | 3.88 ± 3.31       | 7.31 ± 6.76       | 4.63 ± 4.08       | 4.01 ± 3.52             |
| 21  | 100 ± 0         | 8.31 ± 7.69       | 3.86 ± 3.25       | 7.33 ± 6.74       | 4.62 ± 4.03       | 4.03 ± 3.46             |
| 22  | 100 ± 0         | 8.33 ± 7.67       | 3.84 ± 3.18       | 7.34 ± 6.72       | 4.62 ± 3.99       | 4.04 ± 3.43             |
| 23  | 100 ± 0         | 8.34 ± 7.61       | 3.82 ± 3.08       | 7.35 ± 6.65       | 4.61 ± 3.91       | 4.04 ± 3.39             |
| 24  | 100 ± 0         | 8.35 ± 7.6        | 3.79 ± 3.04       | 7.35 ± 6.69       | 4.57 ± 3.9        | 4.04 ± 3.31             |
| 25  | 100 ± 0         | 8.36 ± 7.58       | 3.76 ± 2.98       | 7.37 ± 6.69       | 4.57 ± 3.89       | 4.03 ± 3.28             |
| 26  | 100 ± 0         | 8.37 ± 7.58       | 3.74 ± 2.95       | 7.37 ± 6.69       | 4.57 ± 3.89       | 4.03 ± 3.24             |
| 27  | 100 ± 0         | 8.37 ± 7.54       | 3.71 ± 2.88       | 7.38 ± 6.63       | 4.55 ± 3.8        | 4.02 ± 3.23             |
| 28  | 100 ± 0         | 8.38 ± 7.51       | 3.68 ± 2.81       | 7.38 ± 6.64       | 4.53 ± 3.79       | 4.01 ± 3.18             |
| 29  | 100 ± 0         | 8.38 ± 7.5        | 3.65 ± 2.78       | 7.38 ± 6.64       | 4.5 ± 3.76        | 4 ± 3.13                |
| 30  | 100 ± 0         | 8.38 ± 7.5        | 3.62 ± 2.74       | 7.37 ± 6.64       | 4.49 ± 3.75       | 3.99 ± 3.11             |
| 31  | 100 ± 0         | 8.37 ± 7.5        | 3.59 ± 2.71       | 7.37 ± 6.67       | 4.47 ± 3.76       | 3.97 ± 3.1              |
| 32  | 100 ± 0         | 8.38 ± 7.47       | 3.56 ± 2.66       | 7.38 ± 6.6        | 4.46 ± 3.68       | 3.95 ± 3.08             |
| 33  | 100 ± 0         | 8.38 ± 7.46       | 3.53 ± 2.62       | 7.37 ± 6.62       | 4.44 ± 3.68       | 3.94 ± 3.03             |
| 34  | 100 ± 0         | 8.38 ± 7.47       | 3.51 ± 2.6        | 7.38 ± 6.64       | 4.43 ± 3.69       | 3.92 ± 3                |
| 35  | 100 ± 0         | 8.38 ± 7.44       | 3.48 ± 2.54       | 7.38 ± 6.59       | 4.42 ± 3.62       | 3.91 ± 3                |
| 36  | 100 ± 0         | 8.38 ± 7.41       | 3.45 ± 2.49       | 7.37 ± 6.58       | 4.4 ± 3.6         | 3.9 ± 2.95              |
| 37  | 100 ± 0         | 8.38 ± 7.42       | 3.43 ± 2.47       | 7.38 ± 6.62       | 4.4 ± 3.64        | 3.88 ± 2.91             |

The average of the prevalence, the CFU-values per square meter (cfu/sqm) and per gram manure are calculated over all iterations. The CFU values in the intestine as well as the excreted and ingested quantities are obtained by calculating the average over all animals in one iteration at first and then over all iterations. The decadic logarithm of zero or negative values is negative infinite (-Inf).

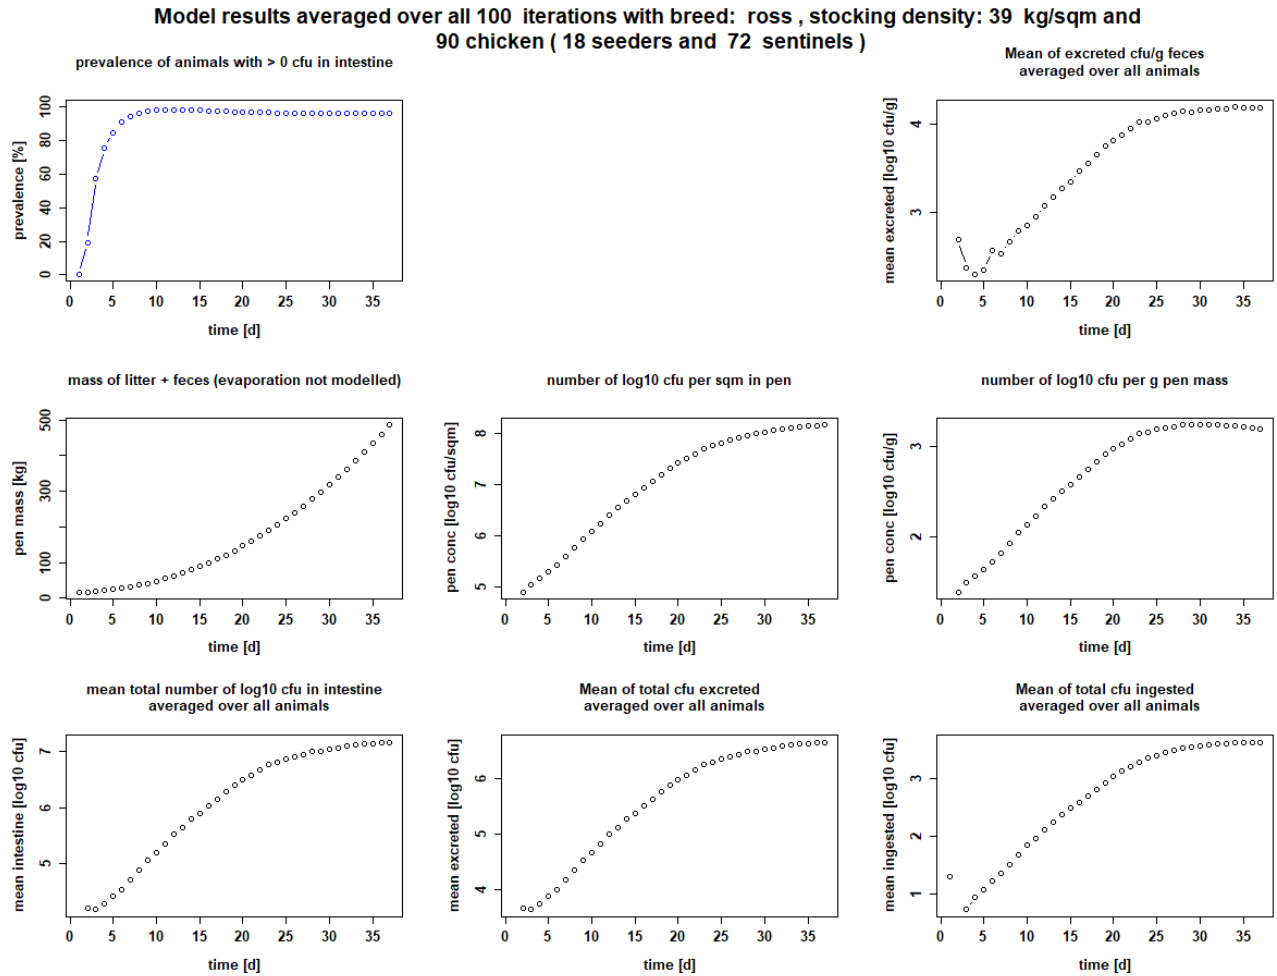

**Figure 7. Calculated infection dynamic when day-old chicks are set positive ( $10^2$  CFU bacteria per chick on day 1), measure 3000 g litter/m<sup>2</sup>. Dotplots with results for 90 chicks, 18 seeder, 72 sentinels, Ross 308, feeding duration 36 days, stocking density 39 kg/m<sup>2</sup>, 3000 g litter/m<sup>2</sup>**

**Table S7a (log CFU). Calculated numeric values for scenario when day-old chicks are set positive ( $10^2$  CFU bacteria per chick on day 1), measure 3000 g litter/m<sup>2</sup>. Setting: 18 seeder, 72 sentinels, Ross 308, feeding duration 36 days; stocking density 39 kg/m<sup>2</sup>, 3000 g litter/m<sup>2</sup>**

| day | prevalence in %   | cfu/sqm           | cfu/g manure      | cfu in intestine  | cfu/g feces       | cfu ingested per animal |
|-----|-------------------|-------------------|-------------------|-------------------|-------------------|-------------------------|
|     | (mean $\pm$ sd)         |
| 1   | 0 $\pm$ 0         | 0e0 $\pm$ 0       | 0e0 $\pm$ 0       | 0e0 $\pm$ 0       | 0e0 $\pm$ 0       | 2e1 $\pm$ 0e1           |
| 2   | 19.23 $\pm$ 0.83  | 8e4 $\pm$ 4.4e4   | 2.4e1 $\pm$ 1.3e1 | 1.6e4 $\pm$ 0.9e4 | 4.8e2 $\pm$ 2.6e2 | 0e0 $\pm$ 0             |
| 3   | 57.27 $\pm$ 24.07 | 1.1e5 $\pm$ 0.6e5 | 3.1e1 $\pm$ 1.6e1 | 1.5e4 $\pm$ 0.8e4 | 2.3e2 $\pm$ 1.3e2 | 5.26 $\pm$ 3.2          |
| 4   | 75.81 $\pm$ 23.09 | 1.5e5 $\pm$ 0.8e5 | 3.7e1 $\pm$ 1.8e1 | 1.9e4 $\pm$ 1e4   | 1.9e2 $\pm$ 1e2   | 8.68 $\pm$ 4.6          |
| 5   | 84.97 $\pm$ 18.14 | 2e5 $\pm$ 1.1e5   | 4.3e1 $\pm$ 2.4e1 | 2.6e4 $\pm$ 1.6e4 | 2.2e2 $\pm$ 1.4e2 | 1.19e1 $\pm$ 0.6e1      |
| 6   | 91.1 $\pm$ 14.36  | 2.7e5 $\pm$ 1.8e5 | 5.2e1 $\pm$ 3.4e1 | 3.4e4 $\pm$ 2.5e4 | 3.6e2 $\pm$ 2.6e2 | 1.64e1 $\pm$ 0.9e1      |
| 7   | 94.42 $\pm$ 10.57 | 3.9e5 $\pm$ 2.7e5 | 6.6e1 $\pm$ 4.5e1 | 5.1e4 $\pm$ 3.7e4 | 3.4e2 $\pm$ 2.4e2 | 2.3e1 $\pm$ 1.5e1       |
| 8   | 96.41 $\pm$ 7.74  | 5.8e5 $\pm$ 4.4e5 | 8.5e1 $\pm$ 6.5e1 | 7.7e4 $\pm$ 6.3e4 | 4.6e2 $\pm$ 3.7e2 | 3.25e1 $\pm$ 2.3e1      |
| 9   | 97.54 $\pm$ 7.6   | 8.7e5 $\pm$ 7.7e5 | 1.1e2 $\pm$ 1e2   | 1.2e5 $\pm$ 1.1e5 | 6.1e2 $\pm$ 5.9e2 | 4.73e1 $\pm$ 3.7e1      |
| 10  | 98.16 $\pm$ 7.27  | 1.2e6 $\pm$ 1.1e6 | 1.4e2 $\pm$ 1.2e2 | 1.6e5 $\pm$ 1.4e5 | 7e2 $\pm$ 6.4e2   | 7.02e1 $\pm$ 6.2e1      |
| 11  | 98.53 $\pm$ 6.24  | 1.7e6 $\pm$ 1.6e6 | 1.7e2 $\pm$ 1.5e2 | 2.3e5 $\pm$ 2.1e5 | 8.9e2 $\pm$ 8.3e2 | 9.33e1 $\pm$ 8.4e1      |
| 12  | 98.24 $\pm$ 9.52  | 2.5e6 $\pm$ 2.2e6 | 2.2e2 $\pm$ 1.9e2 | 3.3e5 $\pm$ 2.9e5 | 1.2e3 $\pm$ 1.1e3 | 1.29e2 $\pm$ 1.2e2      |
| 13  | 98.26 $\pm$ 10.08 | 3.5e6 $\pm$ 3.1e6 | 2.7e2 $\pm$ 2.4e2 | 4.4e5 $\pm$ 4.1e5 | 1.5e3 $\pm$ 1.4e3 | 1.77e2 $\pm$ 1.6e2      |
| 14  | 98.34 $\pm$ 9.72  | 4.8e6 $\pm$ 4.3e6 | 3.3e2 $\pm$ 2.9e2 | 6.1e5 $\pm$ 5.6e5 | 1.9e3 $\pm$ 1.7e3 | 2.35e2 $\pm$ 2.1e2      |
| 15  | 98.27 $\pm$ 10.06 | 6.3e6 $\pm$ 5.9e6 | 3.8e2 $\pm$ 3.6e2 | 7.7e5 $\pm$ 7.6e5 | 2.2e3 $\pm$ 2.1e3 | 3.16e2 $\pm$ 2.8e2      |
| 16  | 97.68 $\pm$ 13    | 8.5e6 $\pm$ 7.7e6 | 4.6e2 $\pm$ 4.2e2 | 1.1e6 $\pm$ 1e6   | 2.9e3 $\pm$ 2.6e3 | 3.94e2 $\pm$ 3.7e2      |
| 17  | 97.61 $\pm$ 13.41 | 1.1e7 $\pm$ 1.1e7 | 5.6e2 $\pm$ 5.2e2 | 1.4e6 $\pm$ 1.4e6 | 3.5e3 $\pm$ 3.4e3 | 5.11e2 $\pm$ 4.6e2      |
| 18  | 97.53 $\pm$ 13.46 | 1.5e7 $\pm$ 1.5e7 | 6.8e2 $\pm$ 6.6e2 | 1.9e6 $\pm$ 1.9e6 | 4.5e3 $\pm$ 4.4e3 | 6.64e2 $\pm$ 6.2e2      |
| 19  | 97.34 $\pm$ 14.93 | 2.1e7 $\pm$ 2.1e7 | 8.3e2 $\pm$ 8.5e2 | 2.6e6 $\pm$ 2.8e6 | 5.6e3 $\pm$ 6.2e3 | 8.61e2 $\pm$ 8.3e2      |
| 20  | 97.2 $\pm$ 15.28  | 2.6e7 $\pm$ 2.6e7 | 9.6e2 $\pm$ 9.5e2 | 3.1e6 $\pm$ 3.1e6 | 6.6e3 $\pm$ 6.5e3 | 1.11e3 $\pm$ 1.1e3      |
| 21  | 97.1 $\pm$ 15.43  | 3.2e7 $\pm$ 3e7   | 1.1e3 $\pm$ 1e3   | 3.8e6 $\pm$ 3.5e6 | 7.5e3 $\pm$ 6.9e3 | 1.36e3 $\pm$ 1.3e3      |
| 22  | 97.06 $\pm$ 15.58 | 4e7 $\pm$ 3.6e7   | 1.2e3 $\pm$ 1.1e3 | 4.7e6 $\pm$ 4.2e6 | 8.9e3 $\pm$ 7.9e3 | 1.62e3 $\pm$ 1.5e3      |
| 23  | 96.77 $\pm$ 16.27 | 4.9e7 $\pm$ 4.4e7 | 1.4e3 $\pm$ 1.2e3 | 5.9e6 $\pm$ 5.4e6 | 1.1e4 $\pm$ 1e4   | 1.95e3 $\pm$ 1.7e3      |
| 24  | 96.28 $\pm$ 18.33 | 5.6e7 $\pm$ 4.9e7 | 1.5e3 $\pm$ 1.3e3 | 6.3e6 $\pm$ 5.7e6 | 1.1e4 $\pm$ 0.9e4 | 2.35e3 $\pm$ 2.1e3      |
| 25  | 96.39 $\pm$ 17.78 | 6.5e7 $\pm$ 5.3e7 | 1.6e3 $\pm$ 1.3e3 | 7.3e6 $\pm$ 5.9e6 | 1.2e4 $\pm$ 1e4   | 2.58e3 $\pm$ 2.2e3      |
| 26  | 96.38 $\pm$ 17.84 | 7.2e7 $\pm$ 5.5e7 | 1.6e3 $\pm$ 1.2e3 | 8e6 $\pm$ 5.9e6   | 1.3e4 $\pm$ 0.9e4 | 2.87e3 $\pm$ 2.4e3      |
| 27  | 96.38 $\pm$ 17.84 | 8.1e7 $\pm$ 5.9e7 | 1.7e3 $\pm$ 1.2e3 | 9e6 $\pm$ 6.6e6   | 1.3e4 $\pm$ 1e4   | 3.11e3 $\pm$ 2.4e3      |
| 28  | 96.41 $\pm$ 17.67 | 9e7 $\pm$ 6.3e7   | 1.8e3 $\pm$ 1.2e3 | 9.9e6 $\pm$ 6.9e6 | 1.4e4 $\pm$ 1e4   | 3.39e3 $\pm$ 2.5e3      |
| 29  | 96.39 $\pm$ 17.79 | 9.7e7 $\pm$ 6.4e7 | 1.7e3 $\pm$ 1.2e3 | 1e7 $\pm$ 0.7e7   | 1.4e4 $\pm$ 0.9e4 | 3.65e3 $\pm$ 2.5e3      |
| 30  | 96.3 $\pm$ 18.22  | 1e8 $\pm$ 0.7e8   | 1.8e3 $\pm$ 1.1e3 | 1.1e7 $\pm$ 0.7e7 | 1.5e4 $\pm$ 0.9e4 | 3.77e3 $\pm$ 2.5e3      |
| 31  | 96.34 $\pm$ 18    | 1.1e8 $\pm$ 0.7e8 | 1.8e3 $\pm$ 1.1e3 | 1.2e7 $\pm$ 0.7e7 | 1.5e4 $\pm$ 0.9e4 | 3.96e3 $\pm$ 2.5e3      |
| 32  | 96.32 $\pm$ 18.11 | 1.2e8 $\pm$ 0.7e8 | 1.8e3 $\pm$ 1e3   | 1.3e7 $\pm$ 0.7e7 | 1.5e4 $\pm$ 0.9e4 | 4.08e3 $\pm$ 2.5e3      |
| 33  | 96.24 $\pm$ 18.49 | 1.2e8 $\pm$ 0.7e8 | 1.7e3 $\pm$ 0.9e3 | 1.3e7 $\pm$ 0.7e7 | 1.5e4 $\pm$ 0.8e4 | 4.18e3 $\pm$ 2.4e3      |
| 34  | 96.24 $\pm$ 18.49 | 1.3e8 $\pm$ 0.7e8 | 1.7e3 $\pm$ 0.9e3 | 1.4e7 $\pm$ 0.7e7 | 1.6e4 $\pm$ 0.8e4 | 4.25e3 $\pm$ 2.3e3      |
| 35  | 96.23 $\pm$ 18.55 | 1.4e8 $\pm$ 0.7e8 | 1.7e3 $\pm$ 0.8e3 | 1.4e7 $\pm$ 0.7e7 | 1.5e4 $\pm$ 0.8e4 | 4.34e3 $\pm$ 2.3e3      |
| 36  | 96.24 $\pm$ 18.5  | 1.4e8 $\pm$ 0.7e8 | 1.6e3 $\pm$ 0.8e3 | 1.4e7 $\pm$ 0.7e7 | 1.5e4 $\pm$ 0.7e4 | 4.37e3 $\pm$ 2.2e3      |
| 37  | 96.26 $\pm$ 18.44 | 1.4e8 $\pm$ 0.7e8 | 1.6e3 $\pm$ 0.7e3 | 1.5e7 $\pm$ 0.7e7 | 1.5e4 $\pm$ 0.7e4 | 4.35e3 $\pm$ 2.1e3      |

The average of the prevalence, the CFU-values per square meter (cfu/sqm) and per gram manure are calculated over all iterations. The CFU values in the intestine as well as the excreted and ingested quantities are obtained by calculating the average over all animals in one iteration at first and then over all iterations.

**Corresponding Table S7b (log<sub>10</sub> CFU). Calculated numeric values for scenario when day-old chicks are set positive (10<sup>2</sup> CFU bacteria per chick on day 1), measure 3000 g litter/m<sup>2</sup>. Setting: 18 seeder, 72 sentinels, Ross 308, feeding duration 36 days, stocking density 39 kg/m<sup>2</sup>, 3000 g litter/m<sup>2</sup>**

| day | prevalence in % | cfu/sqm           | cfu/g manure      | cfu in intestine  | cfu/g feces       | cfu ingested per animal |
|-----|-----------------|-------------------|-------------------|-------------------|-------------------|-------------------------|
|     | (% mean ± sd)   | (log10 mean ± sd) | (log10 mean ± sd) | (log10 mean ± sd) | (log10 mean ± sd) | (log10 mean ± sd)       |
| 1   | 0 ± 0           | -Inf ± -Inf       | -Inf ± -Inf       | -Inf ± -Inf       | -Inf ± -Inf       | 1.3 ± 0                 |
| 2   | 19.23 ± 0.83    | 4.91 ± 4.65       | 1.38 ± 1.12       | 4.21 ± 3.95       | 2.68 ± 2.42       | -Inf ± 0                |
| 3   | 57.27 ± 24.07   | 5.06 ± 4.76       | 1.5 ± 1.2         | 4.17 ± 3.92       | 2.36 ± 2.11       | 0.72 ± 0.5              |
| 4   | 75.81 ± 23.09   | 5.19 ± 4.88       | 1.57 ± 1.26       | 4.28 ± 4.01       | 2.28 ± 2.01       | 0.94 ± 0.67             |
| 5   | 84.97 ± 18.14   | 5.31 ± 5.06       | 1.63 ± 1.38       | 4.41 ± 4.21       | 2.34 ± 2.14       | 1.08 ± 0.79             |
| 6   | 91.1 ± 14.36    | 5.44 ± 5.25       | 1.72 ± 1.54       | 4.53 ± 4.4        | 2.55 ± 2.42       | 1.21 ± 0.98             |
| 7   | 94.42 ± 10.57   | 5.59 ± 5.43       | 1.82 ± 1.66       | 4.71 ± 4.57       | 2.53 ± 2.39       | 1.36 ± 1.19             |
| 8   | 96.41 ± 7.74    | 5.77 ± 5.65       | 1.93 ± 1.81       | 4.89 ± 4.8        | 2.66 ± 2.57       | 1.51 ± 1.36             |
| 9   | 97.54 ± 7.6     | 5.94 ± 5.89       | 2.05 ± 2          | 5.06 ± 5.05       | 2.79 ± 2.77       | 1.68 ± 1.56             |
| 10  | 98.16 ± 7.27    | 6.09 ± 6.04       | 2.14 ± 2.09       | 5.19 ± 5.15       | 2.84 ± 2.81       | 1.85 ± 1.79             |
| 11  | 98.53 ± 6.24    | 6.24 ± 6.2        | 2.23 ± 2.19       | 5.35 ± 5.32       | 2.95 ± 2.92       | 1.97 ± 1.92             |
| 12  | 98.24 ± 9.52    | 6.4 ± 6.35        | 2.34 ± 2.28       | 5.52 ± 5.47       | 3.07 ± 3.02       | 2.11 ± 2.07             |
| 13  | 98.26 ± 10.08   | 6.54 ± 6.5        | 2.43 ± 2.38       | 5.65 ± 5.62       | 3.17 ± 3.14       | 2.25 ± 2.19             |
| 14  | 98.34 ± 9.72    | 6.68 ± 6.64       | 2.51 ± 2.47       | 5.79 ± 5.75       | 3.27 ± 3.23       | 2.37 ± 2.32             |
| 15  | 98.27 ± 10.06   | 6.8 ± 6.77        | 2.58 ± 2.55       | 5.89 ± 5.88       | 3.34 ± 3.33       | 2.5 ± 2.45              |
| 16  | 97.68 ± 13      | 6.93 ± 6.88       | 2.66 ± 2.62       | 6.03 ± 5.98       | 3.46 ± 3.42       | 2.6 ± 2.57              |
| 17  | 97.61 ± 13.41   | 7.06 ± 7.03       | 2.75 ± 2.72       | 6.15 ± 6.14       | 3.55 ± 3.53       | 2.71 ± 2.66             |
| 18  | 97.53 ± 13.46   | 7.19 ± 7.17       | 2.83 ± 2.82       | 6.29 ± 6.28       | 3.65 ± 3.64       | 2.82 ± 2.79             |
| 19  | 97.34 ± 14.93   | 7.31 ± 7.33       | 2.92 ± 2.93       | 6.41 ± 6.45       | 3.75 ± 3.79       | 2.93 ± 2.92             |
| 20  | 97.2 ± 15.28    | 7.42 ± 7.41       | 2.98 ± 2.98       | 6.5 ± 6.49        | 3.82 ± 3.81       | 3.05 ± 3.06             |
| 21  | 97.1 ± 15.43    | 7.51 ± 7.48       | 3.03 ± 3.01       | 6.58 ± 6.55       | 3.87 ± 3.84       | 3.14 ± 3.13             |
| 22  | 97.06 ± 15.58   | 7.6 ± 7.55        | 3.09 ± 3.04       | 6.67 ± 6.62       | 3.95 ± 3.9        | 3.21 ± 3.18             |
| 23  | 96.77 ± 16.27   | 7.69 ± 7.64       | 3.15 ± 3.1        | 6.77 ± 6.73       | 4.02 ± 3.98       | 3.29 ± 3.24             |
| 24  | 96.28 ± 18.33   | 7.75 ± 7.69       | 3.17 ± 3.11       | 6.8 ± 6.75        | 4.02 ± 3.97       | 3.37 ± 3.32             |
| 25  | 96.39 ± 17.78   | 7.81 ± 7.73       | 3.19 ± 3.11       | 6.86 ± 6.77       | 4.07 ± 3.98       | 3.41 ± 3.35             |
| 26  | 96.38 ± 17.84   | 7.86 ± 7.74       | 3.21 ± 3.09       | 6.9 ± 6.77        | 4.1 ± 3.97        | 3.46 ± 3.37             |
| 27  | 96.38 ± 17.84   | 7.91 ± 7.77       | 3.23 ± 3.09       | 6.95 ± 6.82       | 4.12 ± 3.99       | 3.49 ± 3.38             |
| 28  | 96.41 ± 17.67   | 7.96 ± 7.8        | 3.24 ± 3.09       | 7 ± 6.84          | 4.14 ± 3.99       | 3.53 ± 3.39             |
| 29  | 96.39 ± 17.79   | 7.99 ± 7.8        | 3.24 ± 3.06       | 7.01 ± 6.83       | 4.14 ± 3.95       | 3.56 ± 3.41             |
| 30  | 96.3 ± 18.22    | 8.02 ± 7.82       | 3.25 ± 3.04       | 7.05 ± 6.85       | 4.17 ± 3.96       | 3.58 ± 3.4              |
| 31  | 96.34 ± 18      | 8.05 ± 7.83       | 3.25 ± 3.03       | 7.07 ± 6.86       | 4.17 ± 3.95       | 3.6 ± 3.39              |
| 32  | 96.32 ± 18.11   | 8.07 ± 7.84       | 3.24 ± 3.01       | 7.1 ± 6.87        | 4.17 ± 3.95       | 3.61 ± 3.39             |
| 33  | 96.24 ± 18.49   | 8.1 ± 7.83        | 3.24 ± 2.97       | 7.11 ± 6.84       | 4.18 ± 3.9        | 3.62 ± 3.39             |
| 34  | 96.24 ± 18.49   | 8.12 ± 7.84       | 3.24 ± 2.95       | 7.14 ± 6.86       | 4.19 ± 3.92       | 3.63 ± 3.36             |
| 35  | 96.23 ± 18.55   | 8.14 ± 7.83       | 3.23 ± 2.92       | 7.15 ± 6.85       | 4.19 ± 3.89       | 3.64 ± 3.36             |
| 36  | 96.24 ± 18.5    | 8.15 ± 7.82       | 3.22 ± 2.89       | 7.16 ± 6.84       | 4.19 ± 3.87       | 3.64 ± 3.34             |
| 37  | 96.26 ± 18.44   | 8.16 ± 7.82       | 3.2 ± 2.87        | 7.17 ± 6.85       | 4.19 ± 3.86       | 3.64 ± 3.31             |

The average of the prevalence, the CFU-values per square meter (cfu/sqm) and per gram manure are calculated over all iterations. The CFU values in the intestine as well as the excreted and ingested quantities are obtained by calculating the average over all animals in one iteration at first and then over all iterations. The decadic logarithm of zero or negative values is negative infinite (-Inf).

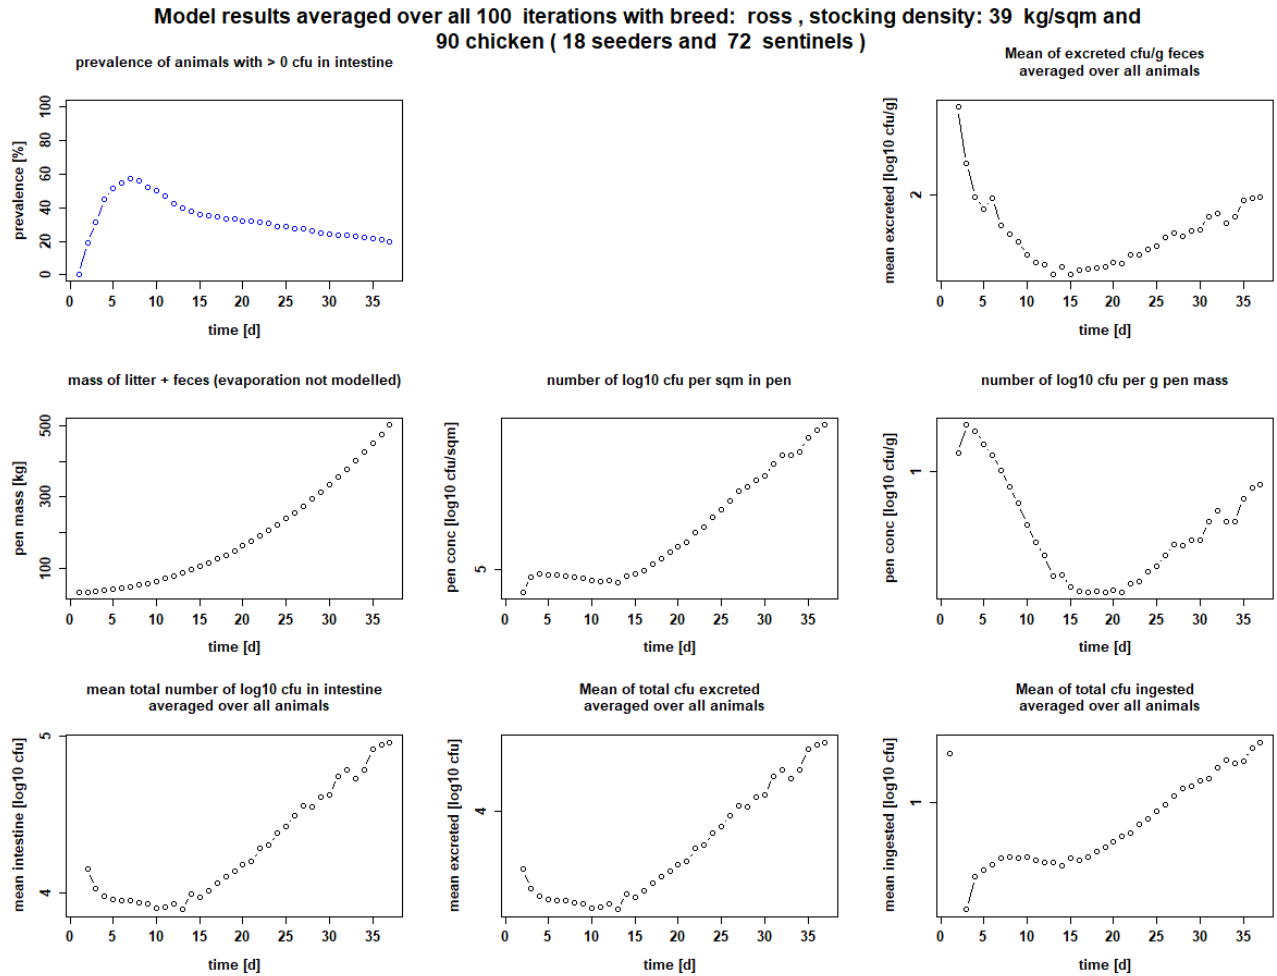

**Figure S8. Calculated infection dynamic when day-old chicks are set positive ( $10^2$  CFU bacteria per chick on day 1), measure 6000 g litter/m<sup>2</sup>. Dotplots with results for 90 chicks, 18 seeder, 72 sentinels, Ross 308, feeding duration 36 days, stocking density 39 kg/m<sup>2</sup>; 6000 g litter/m<sup>2</sup>**

**Table S8a (CFU). Calculated numeric values for scenario when day-old chicks are set positive (10<sup>2</sup> CFU bacteria per chick on day 1), measure 6000 g litter/m<sup>2</sup>. Setting: 18 seeder, 72 sentinels, Ross 308, feeding duration 36 days, stocking density 39 kg/m<sup>2</sup>; 6000 g litter/m<sup>2</sup>**

| day | prevalence in % | cfu/sqm        | cfu/g manure  | cfu in intestine | cfu/g feces    | cfu ingested per animal |
|-----|-----------------|----------------|---------------|------------------|----------------|-------------------------|
|     | (mean ± sd)     | (mean ± sd)    | (mean ± sd)   | (mean ± sd)      | (mean ± sd)    | (mean ± sd)             |
| 1   | 0 ± 0           | 0e0 ± 0        | 0e0 ± 0       | 0e0 ± 0          | 0e0 ± 0        | 2e1 ± 0e1               |
| 2   | 19.19 ± 0.97    | 7.1e4 ± 3.9e4  | 1.1e1 ± 0.6e1 | 1.4e4 ± 0.8e4    | 4.3e2 ± 2.3e2  | 0e0 ± 0                 |
| 3   | 31.5 ± 18.5     | 9e4 ± 3.9e4    | 1.3e1 ± 0.6e1 | 1.1e4 ± 0.6e4    | 1.7e2 ± 1e2    | 2.17 ± 1.5              |
| 4   | 44.99 ± 22.83   | 9.3e4 ± 3.9e4  | 1.3e1 ± 0.5e1 | 9.6e3 ± 5e3      | 9.5e1 ± 5e1    | 3.49 ± 1.7              |
| 5   | 51.51 ± 23.57   | 9.2e4 ± 3.9e4  | 1.2e1 ± 0.5e1 | 9.2e3 ± 5.1e3    | 7.8e1 ± 4.3e1  | 3.81 ± 1.8              |
| 6   | 54.83 ± 24.12   | 9.1e4 ± 4.2e4  | 1.1e1 ± 0.5e1 | 9e3 ± 5e3        | 9.5e1 ± 5.3e1  | 4.12 ± 2                |
| 7   | 57.23 ± 25.11   | 9.1e4 ± 4.6e4  | 1e1 ± 0.5e1   | 8.9e3 ± 5.6e3    | 5.9e1 ± 3.7e1  | 4.53 ± 2.3              |
| 8   | 56.13 ± 27.21   | 8.9e4 ± 5.5e4  | 9.1 ± 5.5     | 8.7e3 ± 6.8e3    | 5.1e1 ± 4e1    | 4.58 ± 2.6              |
| 9   | 52.33 ± 30.29   | 8.8e4 ± 6.2e4  | 8.1 ± 5.8     | 8.6e3 ± 7.3e3    | 4.6e1 ± 3.9e1  | 4.54 ± 3.1              |
| 10  | 50.58 ± 31.81   | 8.4e4 ± 7.1e4  | 7.1 ± 6       | 8.1e3 ± 8.3e3    | 3.6e1 ± 3.8e1  | 4.63 ± 3.7              |
| 11  | 46.78 ± 33.48   | 8.3e4 ± 7.9e4  | 6.3 ± 6       | 8.2e3 ± 8.9e3    | 3.2e1 ± 3.5e1  | 4.4 ± 4.1               |
| 12  | 42.71 ± 34.97   | 8.5e4 ± 9.9e4  | 5.8 ± 6.8     | 8.6e3 ± 12.2e3   | 3.1e1 ± 4.4e1  | 4.28 ± 4.6              |
| 13  | 39.83 ± 36.13   | 8.2e4 ± 10.3e4 | 5.1 ± 6.4     | 7.9e3 ± 11e3     | 2.6e1 ± 3.7e1  | 4.24 ± 5.5              |
| 14  | 38.19 ± 35.86   | 9.1e4 ± 13e4   | 5.1 ± 7.4     | 9.9e3 ± 15.9e3   | 3e1 ± 4.8e1    | 4.03 ± 5.6              |
| 15  | 36.1 ± 36.16    | 9.3e4 ± 15.1e4 | 4.8 ± 7.7     | 9.5e3 ± 17.2e3   | 2.7e1 ± 4.8e1  | 4.5 ± 7.1               |
| 16  | 35.23 ± 36.27   | 9.9e4 ± 17.7e4 | 4.6 ± 8.3     | 1e4 ± 2.1e4      | 2.8e1 ± 5.6e1  | 4.39 ± 8                |
| 17  | 34.62 ± 36.39   | 1.1e5 ± 2.1e5  | 4.6 ± 8.9     | 1.2e4 ± 2.4e4    | 2.9e1 ± 6e1    | 4.58 ± 9.2              |
| 18  | 33.57 ± 36.35   | 1.2e5 ± 2.5e5  | 4.6 ± 9.6     | 1.3e4 ± 2.9e4    | 2.9e1 ± 6.6e1  | 4.94 ± 10.6             |
| 19  | 33.12 ± 36.85   | 1.3e5 ± 2.8e5  | 4.6 ± 10.2    | 1.4e4 ± 3.2e4    | 3e1 ± 7e1      | 5.28 ± 12.2             |
| 20  | 32.12 ± 36.79   | 1.4e5 ± 3.2e5  | 4.7 ± 10.5    | 1.5e4 ± 3.6e4    | 3.2e1 ± 7.5e1  | 5.71 ± 13.7             |
| 21  | 32.08 ± 37.09   | 1.5e5 ± 3.5e5  | 4.6 ± 10.6    | 1.6e4 ± 3.8e4    | 3.1e1 ± 7.4e1  | 6.15 ± 15               |
| 22  | 31.18 ± 36.98   | 1.7e5 ± 4.5e5  | 4.9 ± 12.6    | 1.9e4 ± 5.5e4    | 3.7e1 ± 10.5e1 | 6.51 ± 16               |
| 23  | 30.53 ± 36.5    | 1.9e5 ± 5e5    | 4.9 ± 13.1    | 2e4 ± 5.7e4      | 3.6e1 ± 10.2e1 | 7.29 ± 20               |
| 24  | 29.12 ± 36.47   | 2.2e5 ± 6e5    | 5.2 ± 14.6    | 2.4e4 ± 7.1e4    | 4e1 ± 11.8e1   | 7.85 ± 22               |
| 25  | 28.64 ± 36.43   | 2.4e5 ± 7e5    | 5.4 ± 15.8    | 2.7e4 ± 8e4      | 4.3e1 ± 12.8e1 | 8.79 ± 25.5             |
| 26  | 27.74 ± 36.08   | 2.8e5 ± 8.1e5  | 5.8 ± 17      | 3.1e4 ± 9.2e4    | 4.9e1 ± 14.5e1 | 9.64 ± 28.8             |
| 27  | 27.31 ± 36.26   | 3.2e5 ± 9.5e5  | 6.3 ± 18.6    | 3.6e4 ± 10.9e4   | 5.3e1 ± 16e1   | 1.09e1 ± 3.3e1          |
| 28  | 26.16 ± 35.56   | 3.4e5 ± 10.2e5 | 6.2 ± 18.6    | 3.6e4 ± 10.9e4   | 5e1 ± 15.2e1   | 1.22e1 ± 3.7e1          |
| 29  | 25.13 ± 35.39   | 3.7e5 ± 11.5e5 | 6.4 ± 19.6    | 4.1e4 ± 12.9e4   | 5.4e1 ± 17.1e1 | 1.27e1 ± 3.9e1          |
| 30  | 24.03 ± 35.71   | 4e5 ± 11.9e5   | 6.4 ± 19.1    | 4.2e4 ± 12.5e4   | 5.5e1 ± 16.2e1 | 1.36e1 ± 4.2e1          |
| 31  | 23.91 ± 35.68   | 4.8e5 ± 15.8e5 | 7.2 ± 23.8    | 5.6e4 ± 19.9e4   | 6.9e1 ± 24.8e1 | 1.41e1 ± 4.3e1          |
| 32  | 23.46 ± 35.55   | 5.5e5 ± 18.3e5 | 7.7 ± 25.9    | 6.1e4 ± 21e4     | 7.3e1 ± 25e1   | 1.65e1 ± 5.5e1          |
| 33  | 23.26 ± 35.12   | 5.4e5 ± 18.2e5 | 7.2 ± 24.4    | 5.4e4 ± 18.2e4   | 6.2e1 ± 21e1   | 1.82e1 ± 6.2e1          |
| 34  | 22.13 ± 35.12   | 5.7e5 ± 20.1e5 | 7.2 ± 25.3    | 6.1e4 ± 22.1e4   | 6.9e1 ± 25.1e1 | 1.75e1 ± 6e1            |
| 35  | 21.84 ± 35.08   | 7e5 ± 25.2e5   | 8.4 ± 30      | 8.3e4 ± 30.4e4   | 9e1 ± 33e1     | 1.81e1 ± 6.4e1          |
| 36  | 21.08 ± 34.92   | 7.9e5 ± 31.1e5 | 9 ± 35.1      | 8.8e4 ± 37.3e4   | 9.4e1 ± 39.7e1 | 2.15e1 ± 7.8e1          |
| 37  | 19.57 ± 33.98   | 8.6e5 ± 33.1e5 | 9.2 ± 35.4    | 9.1e4 ± 35.1e4   | 9.5e1 ± 36.4e1 | 2.36e1 ± 9.3e1          |

The average of the prevalence, the CFU-values per square meter (cfu/sqm) and per gram manure are calculated over all iterations. The CFU values in the intestine as well as the excreted and ingested quantities are obtained by calculating the average over all animals in one iteration at first and then over all iterations.

**Table S8b (log<sub>10</sub> CFU). Calculated numeric values for scenario when day-old chicks are set positive (10<sup>2</sup> CFU bacteria per chick on day 1), measure 6000 g litter/m<sup>2</sup>. Setting: 18 seeder, 72 sentinels, Ross 308, feeding duration 36 days, stocking density 39 kg/m<sup>2</sup>; 6000 g litter/m<sup>2</sup>**

| day | prevalence in % | cfu/sqm           | cfu/g manure      | cfu in intestine  | cfu/g feces       | cfu ingested per animal |
|-----|-----------------|-------------------|-------------------|-------------------|-------------------|-------------------------|
|     | (% mean ± sd)   | (log10 mean ± sd) | (log10 mean ± sd) | (log10 mean ± sd) | (log10 mean ± sd) | (log10 mean ± sd)       |
| 1   | 0 ± 0           | -Inf ± -Inf       | -Inf ± -Inf       | -Inf ± -Inf       | -Inf ± -Inf       | 1.3 ± 0                 |
| 2   | 19.19 ± 0.97    | 4.85 ± 4.59       | 1.05 ± 0.79       | 4.15 ± 3.89       | 2.63 ± 2.37       | -Inf ± 0                |
| 3   | 31.5 ± 18.5     | 4.95 ± 4.59       | 1.13 ± 0.77       | 4.03 ± 3.79       | 2.22 ± 1.98       | 0.34 ± 0.18             |
| 4   | 44.99 ± 22.83   | 4.97 ± 4.59       | 1.11 ± 0.74       | 3.98 ± 3.7        | 1.98 ± 1.7        | 0.54 ± 0.24             |
| 5   | 51.51 ± 23.57   | 4.97 ± 4.59       | 1.08 ± 0.7        | 3.96 ± 3.7        | 1.89 ± 1.64       | 0.58 ± 0.27             |
| 6   | 54.83 ± 24.12   | 4.96 ± 4.62       | 1.05 ± 0.71       | 3.96 ± 3.7        | 1.98 ± 1.72       | 0.61 ± 0.3              |
| 7   | 57.23 ± 25.11   | 4.96 ± 4.67       | 1 ± 0.71          | 3.95 ± 3.75       | 1.77 ± 1.57       | 0.66 ± 0.36             |
| 8   | 56.13 ± 27.21   | 4.95 ± 4.74       | 0.96 ± 0.74       | 3.94 ± 3.83       | 1.71 ± 1.6        | 0.66 ± 0.42             |
| 9   | 52.33 ± 30.29   | 4.94 ± 4.8        | 0.91 ± 0.76       | 3.93 ± 3.87       | 1.66 ± 1.59       | 0.66 ± 0.49             |
| 10  | 50.58 ± 31.81   | 4.93 ± 4.85       | 0.85 ± 0.78       | 3.91 ± 3.92       | 1.56 ± 1.57       | 0.67 ± 0.56             |
| 11  | 46.78 ± 33.48   | 4.92 ± 4.9        | 0.8 ± 0.78        | 3.91 ± 3.95       | 1.51 ± 1.55       | 0.64 ± 0.62             |
| 12  | 42.71 ± 34.97   | 4.93 ± 5          | 0.77 ± 0.83       | 3.94 ± 4.09       | 1.49 ± 1.64       | 0.63 ± 0.66             |
| 13  | 39.83 ± 36.13   | 4.91 ± 5.01       | 0.71 ± 0.81       | 3.9 ± 4.04        | 1.42 ± 1.56       | 0.63 ± 0.74             |
| 14  | 38.19 ± 35.86   | 4.96 ± 5.12       | 0.71 ± 0.87       | 4 ± 4.2           | 1.48 ± 1.68       | 0.61 ± 0.75             |
| 15  | 36.1 ± 36.16    | 4.97 ± 5.18       | 0.68 ± 0.89       | 3.98 ± 4.24       | 1.42 ± 1.68       | 0.65 ± 0.85             |
| 16  | 35.23 ± 36.27   | 4.99 ± 5.25       | 0.67 ± 0.92       | 4.02 ± 4.31       | 1.45 ± 1.75       | 0.64 ± 0.91             |
| 17  | 34.62 ± 36.39   | 5.03 ± 5.32       | 0.66 ± 0.95       | 4.06 ± 4.39       | 1.46 ± 1.78       | 0.66 ± 0.96             |
| 18  | 33.57 ± 36.35   | 5.07 ± 5.39       | 0.66 ± 0.98       | 4.11 ± 4.46       | 1.47 ± 1.82       | 0.69 ± 1.03             |
| 19  | 33.12 ± 36.85   | 5.11 ± 5.45       | 0.66 ± 1.01       | 4.14 ± 4.51       | 1.48 ± 1.85       | 0.72 ± 1.09             |
| 20  | 32.12 ± 36.79   | 5.15 ± 5.5        | 0.67 ± 1.02       | 4.19 ± 4.55       | 1.51 ± 1.88       | 0.76 ± 1.14             |
| 21  | 32.08 ± 37.09   | 5.18 ± 5.54       | 0.66 ± 1.02       | 4.2 ± 4.58        | 1.5 ± 1.87        | 0.79 ± 1.18             |
| 22  | 31.18 ± 36.98   | 5.24 ± 5.65       | 0.69 ± 1.1        | 4.28 ± 4.74       | 1.56 ± 2.02       | 0.81 ± 1.2              |
| 23  | 30.53 ± 36.5    | 5.27 ± 5.7        | 0.69 ± 1.12       | 4.31 ± 4.75       | 1.56 ± 2.01       | 0.86 ± 1.3              |
| 24  | 29.12 ± 36.47   | 5.33 ± 5.78       | 0.72 ± 1.17       | 4.39 ± 4.85       | 1.61 ± 2.07       | 0.89 ± 1.34             |
| 25  | 28.64 ± 36.43   | 5.38 ± 5.85       | 0.74 ± 1.2        | 4.43 ± 4.9        | 1.63 ± 2.11       | 0.94 ± 1.41             |
| 26  | 27.74 ± 36.08   | 5.44 ± 5.91       | 0.77 ± 1.23       | 4.5 ± 4.97        | 1.69 ± 2.16       | 0.98 ± 1.46             |
| 27  | 27.31 ± 36.26   | 5.5 ± 5.98        | 0.8 ± 1.27        | 4.56 ± 5.04       | 1.72 ± 2.21       | 1.04 ± 1.51             |
| 28  | 26.16 ± 35.56   | 5.53 ± 6.01       | 0.79 ± 1.27       | 4.55 ± 5.04       | 1.7 ± 2.18        | 1.09 ± 1.57             |
| 29  | 25.13 ± 35.39   | 5.57 ± 6.06       | 0.81 ± 1.29       | 4.61 ± 5.11       | 1.74 ± 2.23       | 1.1 ± 1.59              |
| 30  | 24.03 ± 35.71   | 5.6 ± 6.07        | 0.81 ± 1.28       | 4.63 ± 5.1        | 1.74 ± 2.21       | 1.13 ± 1.63             |
| 31  | 23.91 ± 35.68   | 5.68 ± 6.2        | 0.86 ± 1.38       | 4.74 ± 5.3        | 1.84 ± 2.39       | 1.15 ± 1.63             |
| 32  | 23.46 ± 35.55   | 5.74 ± 6.26       | 0.89 ± 1.41       | 4.78 ± 5.32       | 1.86 ± 2.4        | 1.22 ± 1.74             |
| 33  | 23.26 ± 35.12   | 5.73 ± 6.26       | 0.86 ± 1.39       | 4.73 ± 5.26       | 1.79 ± 2.32       | 1.26 ± 1.79             |
| 34  | 22.13 ± 35.12   | 5.76 ± 6.3        | 0.86 ± 1.4        | 4.78 ± 5.35       | 1.84 ± 2.4        | 1.24 ± 1.78             |
| 35  | 21.84 ± 35.08   | 5.85 ± 6.4        | 0.92 ± 1.48       | 4.92 ± 5.48       | 1.95 ± 2.52       | 1.26 ± 1.8              |
| 36  | 21.08 ± 34.92   | 5.9 ± 6.49        | 0.95 ± 1.55       | 4.95 ± 5.57       | 1.97 ± 2.6        | 1.33 ± 1.89             |
| 37  | 19.57 ± 33.98   | 5.93 ± 6.52       | 0.96 ± 1.55       | 4.96 ± 5.54       | 1.98 ± 2.56       | 1.37 ± 1.97             |

The average of the prevalence, the CFU-values per square meter (cfu/sqm) and per gram manure are calculated over all iterations. The CFU values in the intestine as well as the excreted and ingested quantities are obtained by calculating the average over all animals in one iteration at first and then over all iterations. The decadic logarithm of zero or negative values is negative infinite (-Inf).



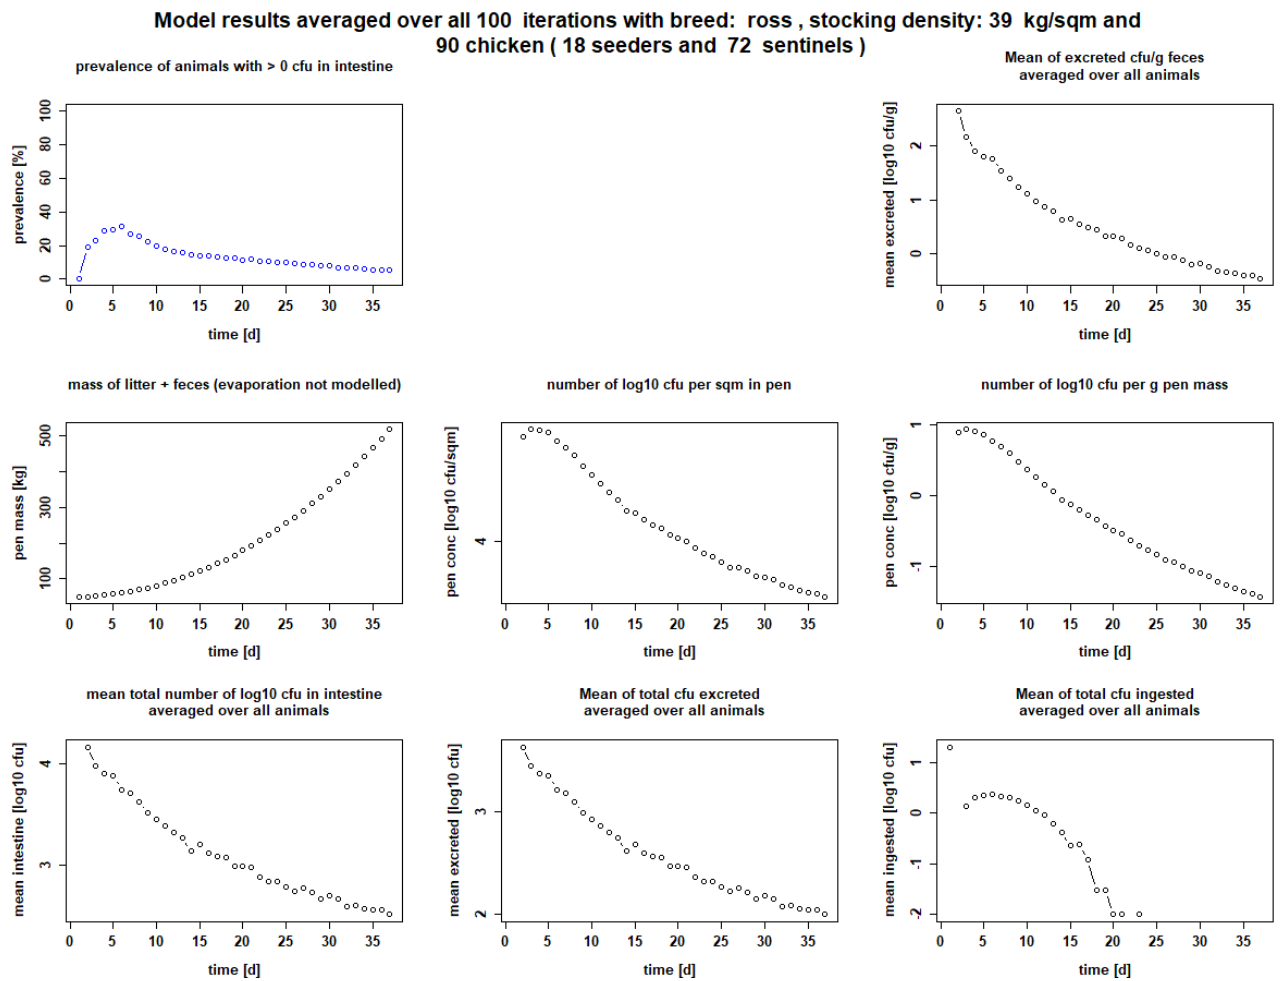

**Figure S9. Calculated infection dynamic when day-old chicks are set positive ( $10^2$  CFU bacteria per chick on day 1), measure 9000 g litter/m<sup>2</sup>. Dotplots with results for 90 chicks, 18 seeder, 72 sentinels, Ross 308, feeding duration 36 days, stocking density 39 kg/m<sup>2</sup>; 9000 g litter/m<sup>2</sup>**

**Table S9a (CFU). Calculated numeric values for scenario when day-old chicks are set positive (10<sup>2</sup> CFU bacteria per chick on day 1), measure 9000 g litter/m<sup>2</sup>. Setting: 18 seeder, 72 sentinels, Ross 308, feeding duration 36 days, stocking density 39 kg/m<sup>2</sup>; 9000 g litter/m<sup>2</sup>**

| day | prevalence in % | cfu/sqm       | cfu/g manure    | cfu in intestine | cfu/g feces     | cfu ingested per animal |
|-----|-----------------|---------------|-----------------|------------------|-----------------|-------------------------|
|     | (mean ± sd)     | (mean ± sd)   | (mean ± sd)     | (mean ± sd)      | (mean ± sd)     | (mean ± sd)             |
| 1   | 0 ± 0           | 0e0 ± 0       | 0e0 ± 0         | 0e0 ± 0          | 0e0 ± 0         | 2e1 ± 0e1               |
| 2   | 19.2 ± 0.85     | 7.2e4 ± 4.5e4 | 7.8 ± 4.8       | 1.4e4 ± 0.9e4    | 4.3e2 ± 2.7e2   | 0e0 ± 0                 |
| 3   | 22.96 ± 11.57   | 8.4e4 ± 3.7e4 | 8.7 ± 3.8       | 9.5e3 ± 5.8e3    | 1.5e2 ± 0.9e2   | 1.35 ± 1.2              |
| 4   | 28.84 ± 16.48   | 8.2e4 ± 3.6e4 | 8.1 ± 3.5       | 8e3 ± 4.8e3      | 7.9e1 ± 4.8e1   | 1.99 ± 1.2              |
| 5   | 29.72 ± 16.97   | 7.8e4 ± 3.3e4 | 7.3 ± 3         | 7.5e3 ± 4.4e3    | 6.4e1 ± 3.8e1   | 2.25 ± 1.2              |
| 6   | 31.47 ± 18.3    | 6.7e4 ± 2.9e4 | 6 ± 2.6         | 5.5e3 ± 3.5e3    | 5.8e1 ± 3.6e1   | 2.33 ± 1.2              |
| 7   | 27.13 ± 17.83   | 5.9e4 ± 2.6e4 | 4.9 ± 2.2       | 5.1e3 ± 3.1e3    | 3.4e1 ± 2.1e1   | 2.17 ± 1.2              |
| 8   | 25.84 ± 16.7    | 5.1e4 ± 2.3e4 | 3.9 ± 1.8       | 4.2e3 ± 2.7e3    | 2.5e1 ± 1.6e1   | 1.99 ± 1.1              |
| 9   | 22.23 ± 14.03   | 4.2e4 ± 1.9e4 | 3 ± 1.4         | 3.2e3 ± 2.2e3    | 1.7e1 ± 1.2e1   | 1.72 ± 1.1              |
| 10  | 19.8 ± 11.28    | 3.5e4 ± 1.6e4 | 2.4 ± 1.1       | 2.8e3 ± 2e3      | 1.3e1 ± 0.9e1   | 1.41 ± 0.9              |
| 11  | 17.46 ± 7.97    | 3e4 ± 1.4e4   | 1.8 ± 0.9       | 2.4e3 ± 1.9e3    | 9.6 ± 7.3       | 1.12 ± 0.8              |
| 12  | 16.43 ± 8.29    | 2.5e4 ± 1.2e4 | 1.4 ± 0.7       | 2.1e3 ± 1.6e3    | 7.5 ± 5.7       | 9.3e-1 ± 7.7e-1         |
| 13  | 15.54 ± 5.61    | 2.2e4 ± 1e4   | 1.2 ± 0.5       | 1.9e3 ± 1.3e3    | 6.2 ± 4.3       | 6.1e-1 ± 7.1e-1         |
| 14  | 14.26 ± 3.85    | 1.8e4 ± 0.7e4 | 8.6e-1 ± 3.5e-1 | 1.4e3 ± 1e3      | 4.2 ± 3.2       | 4.1e-1 ± 5.7e-1         |
| 15  | 13.84 ± 2.37    | 1.7e4 ± 0.7e4 | 7.6e-1 ± 3e-1   | 1.6e3 ± 1.1e3    | 4.5 ± 3         | 2.3e-1 ± 4.5e-1         |
| 16  | 13.58 ± 2.31    | 1.5e4 ± 0.5e4 | 6.2e-1 ± 2.2e-1 | 1.3e3 ± 0.8e3    | 3.6 ± 2.1       | 2.4e-1 ± 4.3e-1         |
| 17  | 13.24 ± 2.38    | 1.4e4 ± 0.5e4 | 5.2e-1 ± 1.8e-1 | 1.2e3 ± 0.9e3    | 3.1 ± 2.1       | 1.2e-1 ± 3.3e-1         |
| 18  | 12.51 ± 2.27    | 1.3e4 ± 0.5e4 | 4.5e-1 ± 1.6e-1 | 1.2e3 ± 0.8e3    | 2.8 ± 1.8       | 3e-2 ± 17.1e-2          |
| 19  | 12.41 ± 2.12    | 1.1e4 ± 0.4e4 | 3.7e-1 ± 1.3e-1 | 9.9e2 ± 7.3e2    | 2.2 ± 1.6       | 3e-2 ± 17.1e-2          |
| 20  | 11.51 ± 2.18    | 1.1e4 ± 0.4e4 | 3.2e-1 ± 1.3e-1 | 9.9e2 ± 7.7e2    | 2.1 ± 1.6       | 1e-2 ± 10e-2            |
| 21  | 11.62 ± 2.06    | 1e4 ± 0.4e4   | 2.8e-1 ± 1e-1   | 9.6e2 ± 5.9e2    | 1.9 ± 1.2       | 1e-2 ± 10e-2            |
| 22  | 10.74 ± 2.4     | 8.9e3 ± 3.6e3 | 2.3e-1 ± 0.9e-1 | 7.7e2 ± 5.7e2    | 1.5 ± 1.1       | 0e0 ± 0                 |
| 23  | 10.3 ± 2.3      | 8e3 ± 3.2e3   | 1.9e-1 ± 0.8e-1 | 7e2 ± 5e2        | 1.2 ± 0.9       | 1e-2 ± 10e-2            |
| 24  | 10.18 ± 2.18    | 7.5e3 ± 3e3   | 1.7e-1 ± 0.7e-1 | 7e2 ± 5.1e2      | 1.2 ± 0.8       | 0e0 ± 0                 |
| 25  | 9.63 ± 2.19     | 6.9e3 ± 3e3   | 1.4e-1 ± 0.6e-1 | 6.2e2 ± 4.8e2    | 9.9e-1 ± 7.6e-1 | 0e0 ± 0                 |
| 26  | 9.36 ± 2.06     | 6.2e3 ± 2.3e3 | 1.2e-1 ± 0.5e-1 | 5.5e2 ± 4.6e2    | 8.7e-1 ± 7.2e-1 | 0e0 ± 0                 |
| 27  | 8.87 ± 2.22     | 6.1e3 ± 2.5e3 | 1.1e-1 ± 0.5e-1 | 6e2 ± 4.5e2      | 8.8e-1 ± 6.7e-1 | 0e0 ± 0                 |
| 28  | 8.72 ± 2.31     | 5.8e3 ± 2.3e3 | 10e-2 ± 4.1e-2  | 5.4e2 ± 3.9e2    | 7.6e-1 ± 5.5e-1 | 0e0 ± 0                 |
| 29  | 8.04 ± 2.25     | 5.3e3 ± 2.3e3 | 8.6e-2 ± 3.8e-2 | 4.7e2 ± 4.1e2    | 6.3e-1 ± 5.4e-1 | 0e0 ± 0                 |
| 30  | 7.83 ± 2.42     | 5.1e3 ± 2.7e3 | 7.9e-2 ± 4.1e-2 | 5e2 ± 4.8e2      | 6.5e-1 ± 6.2e-1 | 0e0 ± 0                 |
| 31  | 6.99 ± 2.39     | 4.9e3 ± 2.4e3 | 7.1e-2 ± 3.4e-2 | 4.7e2 ± 4.2e2    | 5.9e-1 ± 5.2e-1 | 0e0 ± 0                 |
| 32  | 7 ± 2.36        | 4.4e3 ± 2.1e3 | 6.1e-2 ± 2.8e-2 | 3.9e2 ± 3.7e2    | 4.7e-1 ± 4.4e-1 | 0e0 ± 0                 |
| 33  | 6.8 ± 2.17      | 4.2e3 ± 2.1e3 | 5.4e-2 ± 2.7e-2 | 4e2 ± 3.6e2      | 4.6e-1 ± 4.2e-1 | 0e0 ± 0                 |
| 34  | 6.33 ± 2.23     | 4e3 ± 2.1e3   | 4.9e-2 ± 2.6e-2 | 3.8e2 ± 3.7e2    | 4.3e-1 ± 4.2e-1 | 0e0 ± 0                 |
| 35  | 5.62 ± 2.35     | 3.8e3 ± 2e3   | 4.4e-2 ± 2.3e-2 | 3.6e2 ± 3.6e2    | 4e-1 ± 3.9e-1   | 0e0 ± 0                 |
| 36  | 5.56 ± 2.16     | 3.8e3 ± 2.2e3 | 4.1e-2 ± 2.4e-2 | 3.7e2 ± 3.8e2    | 3.9e-1 ± 4e-1   | 0e0 ± 0                 |
| 37  | 5.29 ± 1.97     | 3.5e3 ± 1.8e3 | 3.7e-2 ± 1.9e-2 | 3.3e2 ± 2.9e2    | 3.4e-1 ± 3e-1   | 0e0 ± 0                 |

The average of the prevalence, the CFU-values per square meter (cfu/sqm) and per gram manure are calculated over all iterations. The CFU values in the intestine as well as the excreted and ingested quantities are obtained by calculating the average over all animals in one iteration at first and then over all iterations.

**Table S9b (log<sub>10</sub> CFU). Calculated numeric values for scenario when day-old chicks are set positive (10<sup>2</sup> CFU bacteria per chick on day 1), measure 9000 g litter/m<sup>2</sup>. Setting: 18 seeder, 72 sentinels, Ross 308, feeding duration 36 days, stocking density 39 kg/m<sup>2</sup>; 9000 g litter/m<sup>2</sup>**

| day | prevalence in % | cfu/sqm                       | cfu/g manure                  | cfu in intestine              | cfu/g feces                   | cfu ingested per animal       |
|-----|-----------------|-------------------------------|-------------------------------|-------------------------------|-------------------------------|-------------------------------|
|     | (% mean ± sd)   | (log <sub>10</sub> mean ± sd) | (log <sub>10</sub> mean ± sd) | (log <sub>10</sub> mean ± sd) | (log <sub>10</sub> mean ± sd) | (log <sub>10</sub> mean ± sd) |
| 1   | 0 ± 0           | -Inf ± -Inf                   | -Inf ± -Inf                   | -Inf ± -Inf                   | -Inf ± -Inf                   | 1.3 ± 0                       |
| 2   | 19.2 ± 0.85     | 4.86 ± 4.65                   | 0.89 ± 0.68                   | 4.16 ± 3.95                   | 2.64 ± 2.43                   | -Inf ± 0                      |
| 3   | 22.96 ± 11.57   | 4.92 ± 4.57                   | 0.94 ± 0.59                   | 3.98 ± 3.76                   | 2.17 ± 1.95                   | 0.13 ± 0.07                   |
| 4   | 28.84 ± 16.48   | 4.91 ± 4.56                   | 0.91 ± 0.55                   | 3.9 ± 3.68                    | 1.9 ± 1.68                    | 0.3 ± 0.07                    |
| 5   | 29.72 ± 16.97   | 4.89 ± 4.51                   | 0.86 ± 0.48                   | 3.87 ± 3.64                   | 1.81 ± 1.58                   | 0.35 ± 0.09                   |
| 6   | 31.47 ± 18.3    | 4.83 ± 4.46                   | 0.78 ± 0.41                   | 3.74 ± 3.54                   | 1.76 ± 1.56                   | 0.37 ± 0.1                    |
| 7   | 27.13 ± 17.83   | 4.77 ± 4.41                   | 0.69 ± 0.34                   | 3.71 ± 3.49                   | 1.53 ± 1.31                   | 0.34 ± 0.07                   |
| 8   | 25.84 ± 16.7    | 4.7 ± 4.37                    | 0.6 ± 0.26                    | 3.63 ± 3.44                   | 1.4 ± 1.21                    | 0.3 ± 0.03                    |
| 9   | 22.23 ± 14.03   | 4.62 ± 4.28                   | 0.48 ± 0.14                   | 3.51 ± 3.35                   | 1.23 ± 1.07                   | 0.24 ± 0.02                   |
| 10  | 19.8 ± 11.28    | 4.54 ± 4.2                    | 0.37 ± 0.03                   | 3.45 ± 3.3                    | 1.11 ± 0.95                   | 0.15 ± -0.03                  |
| 11  | 17.46 ± 7.97    | 4.47 ± 4.16                   | 0.26 ± -0.05                  | 3.38 ± 3.27                   | 0.98 ± 0.86                   | 0.05 ± -0.11                  |
| 12  | 16.43 ± 8.29    | 4.4 ± 4.09                    | 0.16 ± -0.15                  | 3.32 ± 3.2                    | 0.87 ± 0.76                   | -0.03 ± -0.11                 |
| 13  | 15.54 ± 5.61    | 4.34 ± 3.98                   | 0.06 ± -0.3                   | 3.27 ± 3.11                   | 0.8 ± 0.63                    | -0.21 ± -0.15                 |
| 14  | 14.26 ± 3.85    | 4.25 ± 3.87                   | -0.06 ± -0.45                 | 3.14 ± 3.02                   | 0.62 ± 0.5                    | -0.39 ± -0.24                 |
| 15  | 13.84 ± 2.37    | 4.23 ± 3.82                   | -0.12 ± -0.53                 | 3.21 ± 3.03                   | 0.65 ± 0.47                   | -0.64 ± -0.35                 |
| 16  | 13.58 ± 2.31    | 4.18 ± 3.73                   | -0.21 ± -0.66                 | 3.12 ± 2.89                   | 0.56 ± 0.33                   | -0.62 ± -0.37                 |
| 17  | 13.24 ± 2.38    | 4.14 ± 3.67                   | -0.28 ± -0.75                 | 3.09 ± 2.94                   | 0.49 ± 0.33                   | -0.92 ± -0.49                 |
| 18  | 12.51 ± 2.27    | 4.11 ± 3.66                   | -0.34 ± -0.79                 | 3.08 ± 2.9                    | 0.44 ± 0.26                   | -1.52 ± -0.77                 |
| 19  | 12.41 ± 2.12    | 4.06 ± 3.62                   | -0.43 ± -0.87                 | 2.99 ± 2.86                   | 0.33 ± 0.2                    | -1.52 ± -0.77                 |
| 20  | 11.51 ± 2.18    | 4.03 ± 3.63                   | -0.49 ± -0.89                 | 2.99 ± 2.89                   | 0.32 ± 0.21                   | -2 ± -1                       |
| 21  | 11.62 ± 2.06    | 4.01 ± 3.56                   | -0.55 ± -0.99                 | 2.98 ± 2.77                   | 0.28 ± 0.07                   | -2 ± -1                       |
| 22  | 10.74 ± 2.4     | 3.95 ± 3.56                   | -0.63 ± -1.02                 | 2.89 ± 2.75                   | 0.17 ± 0.03                   | -Inf ± 0                      |
| 23  | 10.3 ± 2.3      | 3.9 ± 3.51                    | -0.71 ± -1.11                 | 2.84 ± 2.7                    | 0.1 ± -0.05                   | -2 ± -1                       |
| 24  | 10.18 ± 2.18    | 3.87 ± 3.47                   | -0.77 ± -1.18                 | 2.84 ± 2.7                    | 0.06 ± -0.08                  | -Inf ± 0                      |
| 25  | 9.63 ± 2.19     | 3.84 ± 3.47                   | -0.84 ± -1.2                  | 2.79 ± 2.68                   | 0 ± -0.12                     | -Inf ± 0                      |
| 26  | 9.36 ± 2.06     | 3.79 ± 3.36                   | -0.91 ± -1.35                 | 2.74 ± 2.66                   | -0.06 ± -0.14                 | -Inf ± 0                      |
| 27  | 8.87 ± 2.22     | 3.78 ± 3.4                    | -0.95 ± -1.33                 | 2.77 ± 2.66                   | -0.06 ± -0.18                 | -Inf ± 0                      |
| 28  | 8.72 ± 2.31     | 3.76 ± 3.37                   | -1 ± -1.39                    | 2.73 ± 2.59                   | -0.12 ± -0.26                 | -Inf ± 0                      |
| 29  | 8.04 ± 2.25     | 3.72 ± 3.37                   | -1.07 ± -1.42                 | 2.67 ± 2.61                   | -0.2 ± -0.27                  | -Inf ± 0                      |
| 30  | 7.83 ± 2.42     | 3.71 ± 3.43                   | -1.1 ± -1.39                  | 2.7 ± 2.68                    | -0.18 ± -0.21                 | -Inf ± 0                      |
| 31  | 6.99 ± 2.39     | 3.69 ± 3.37                   | -1.15 ± -1.47                 | 2.67 ± 2.62                   | -0.23 ± -0.28                 | -Inf ± 0                      |
| 32  | 7 ± 2.36        | 3.65 ± 3.32                   | -1.22 ± -1.55                 | 2.6 ± 2.56                    | -0.33 ± -0.36                 | -Inf ± 0                      |
| 33  | 6.8 ± 2.17      | 3.63 ± 3.33                   | -1.26 ± -1.57                 | 2.6 ± 2.56                    | -0.34 ± -0.38                 | -Inf ± 0                      |
| 34  | 6.33 ± 2.23     | 3.6 ± 3.33                    | -1.31 ± -1.59                 | 2.58 ± 2.57                   | -0.37 ± -0.38                 | -Inf ± 0                      |
| 35  | 5.62 ± 2.35     | 3.58 ± 3.3                    | -1.35 ± -1.64                 | 2.56 ± 2.56                   | -0.4 ± -0.4                   | -Inf ± 0                      |
| 36  | 5.56 ± 2.16     | 3.58 ± 3.34                   | -1.39 ± -1.62                 | 2.57 ± 2.58                   | -0.41 ± -0.39                 | -Inf ± 0                      |
| 37  | 5.29 ± 1.97     | 3.55 ± 3.25                   | -1.44 ± -1.73                 | 2.52 ± 2.46                   | -0.47 ± -0.52                 | -Inf ± 0                      |

The average of the prevalence, the CFU-values per square meter (cfu/sqm) and per gram manure are calculated over all iterations. The CFU values in the intestine as well as the excreted and ingested quantities are obtained by calculating the average over all animals in one iteration at first and then over all iterations. The decadic logarithm of zero or negative values is negative infinite (-Inf).

Model results averaged over all 100 iterations with breed: rowan ranger , stocking density: 39 kg/sqm and 90 chicken ( 18 seeders and 72 sentinels )

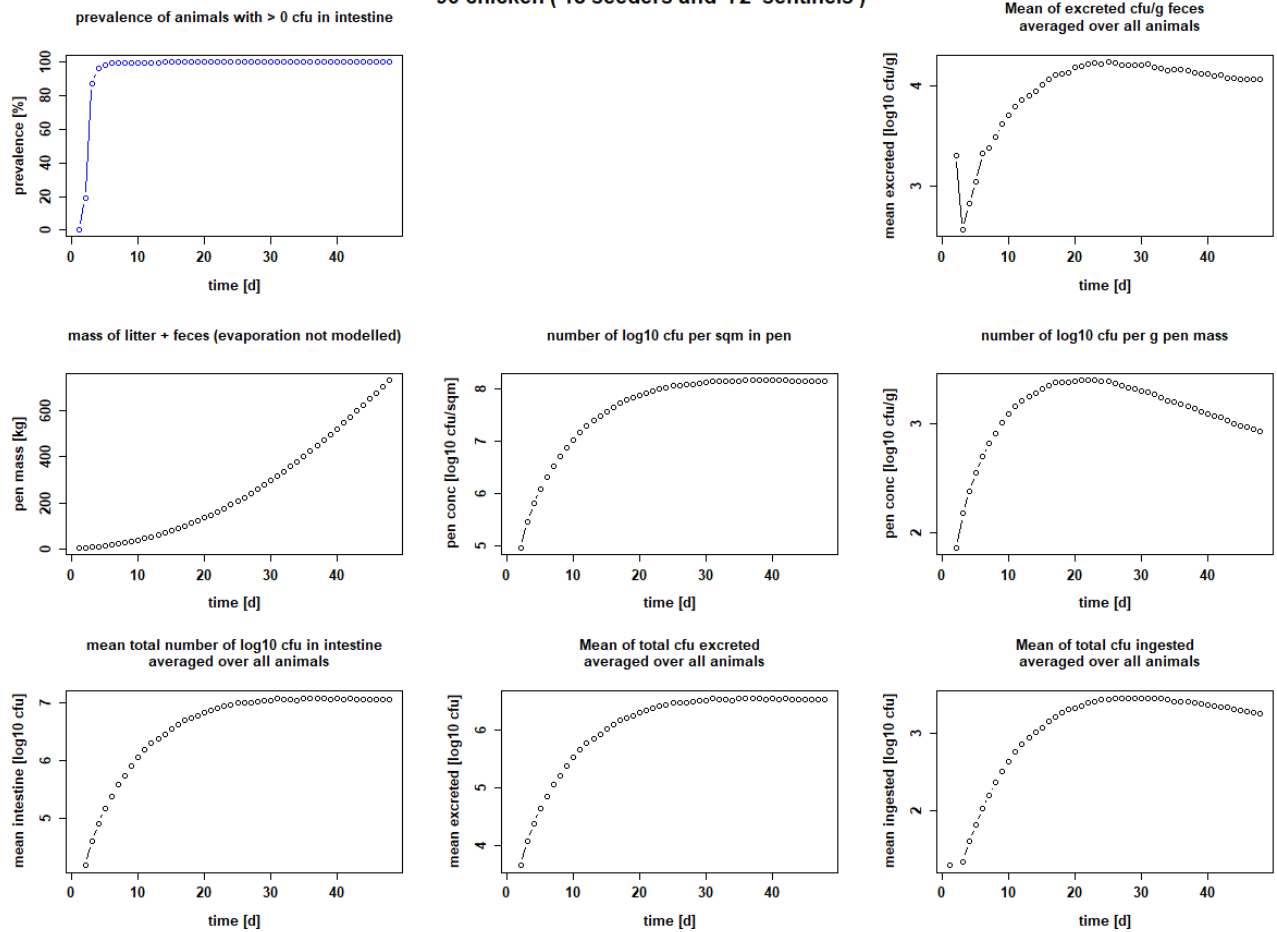

**Figure S10. Calculated infection dynamic when day-old chicks are set positive ( $10^2$  CFU bacteria per chick on day 1), measure slow growing breed.** Dotplots with results for 90 chicks, 18 seeder, 72 sentinels, Rowan x Ranger, feeding duration 47 days, stocking density 39 kg/m<sup>2</sup>; 1000g litter/m<sup>2</sup>

**Table S10a (CFU). Calculated numeric values for scenario when day-old chicks are set positive ( $10^2$  CFU bacteria per chick on day 1), measure slow growing breed. Setting: 90 chicks, 18 seeder, 72 sentinels, Rowan x Ranger, feeding duration 47 days; stocking density 39 kg/m<sup>2</sup>, 1000 g litter/m<sup>2</sup>**

| day | prevalence in %   | cfu/sqm           | cfu/g manure      | cfu in intestine  | cfu/g feces       | cfu ingested per animal |
|-----|-------------------|-------------------|-------------------|-------------------|-------------------|-------------------------|
|     | (mean $\pm$ sd)         |
| 1   | 0 $\pm$ 0         | 0e0 $\pm$ 0       | 0e0 $\pm$ 0       | 0e0 $\pm$ 0       | 0e0 $\pm$ 0       | 2e1 $\pm$ 0e1           |
| 2   | 19.12 $\pm$ 0.87  | 9e4 $\pm$ 6e4     | 7.2e1 $\pm$ 4.8e1 | 1.5e4 $\pm$ 1e4   | 2e3 $\pm$ 1.4e3   | 0e0 $\pm$ 0             |
| 3   | 87.49 $\pm$ 12.77 | 2.8e5 $\pm$ 1.8e5 | 1.5e2 $\pm$ 0.9e2 | 3.9e4 $\pm$ 2.4e4 | 3.7e2 $\pm$ 2.3e2 | 2.26e1 $\pm$ 1.6e1      |
| 4   | 96.36 $\pm$ 8.11  | 6.3e5 $\pm$ 4.3e5 | 2.4e2 $\pm$ 1.6e2 | 8e4 $\pm$ 5.7e4   | 6.7e2 $\pm$ 4.7e2 | 4.11e1 $\pm$ 2.6e1      |
| 5   | 98.67 $\pm$ 4.02  | 1.2e6 $\pm$ 0.9e6 | 3.5e2 $\pm$ 2.6e2 | 1.4e5 $\pm$ 1.1e5 | 1.1e3 $\pm$ 0.9e3 | 6.68e1 $\pm$ 4.6e1      |
| 6   | 99.59 $\pm$ 1.82  | 2e6 $\pm$ 1.6e6   | 5e2 $\pm$ 3.8e2   | 2.3e5 $\pm$ 1.9e5 | 2.1e3 $\pm$ 1.7e3 | 1.07e2 $\pm$ 0.8e2      |
| 7   | 99.71 $\pm$ 1.35  | 3.3e6 $\pm$ 2.6e6 | 6.6e2 $\pm$ 5.1e2 | 3.8e5 $\pm$ 3e5   | 2.4e3 $\pm$ 1.9e3 | 1.59e2 $\pm$ 1.2e2      |
| 8   | 99.91 $\pm$ 0.54  | 5e6 $\pm$ 4.1e6   | 8.2e2 $\pm$ 6.7e2 | 5.5e5 $\pm$ 4.8e5 | 3.1e3 $\pm$ 2.7e3 | 2.29e2 $\pm$ 1.8e2      |
| 9   | 99.9 $\pm$ 0.53   | 7.4e6 $\pm$ 5.8e6 | 1e3 $\pm$ 0.8e3   | 8.1e5 $\pm$ 6.3e5 | 4.1e3 $\pm$ 3.2e3 | 3.21e2 $\pm$ 2.6e2      |
| 10  | 99.92 $\pm$ 0.51  | 1.1e7 $\pm$ 0.9e7 | 1.2e3 $\pm$ 1e3   | 1.1e6 $\pm$ 1e6   | 5.1e3 $\pm$ 4.4e3 | 4.26e2 $\pm$ 3.3e2      |
| 11  | 99.98 $\pm$ 0.16  | 1.5e7 $\pm$ 1.3e7 | 1.5e3 $\pm$ 1.3e3 | 1.6e6 $\pm$ 1.4e6 | 6.1e3 $\pm$ 5.6e3 | 5.65e2 $\pm$ 4.6e2      |
| 12  | 99.99 $\pm$ 0.11  | 2e7 $\pm$ 1.7e7   | 1.6e3 $\pm$ 1.4e3 | 2e6 $\pm$ 1.8e6   | 7.1e3 $\pm$ 6.5e3 | 7.14e2 $\pm$ 6.2e2      |
| 13  | 99.98 $\pm$ 0.16  | 2.4e7 $\pm$ 2.1e7 | 1.8e3 $\pm$ 1.5e3 | 2.4e6 $\pm$ 2e6   | 8e3 $\pm$ 6.7e3   | 8.69e2 $\pm$ 7.7e2      |
| 14  | 100 $\pm$ 0       | 3e7 $\pm$ 2.5e7   | 1.9e3 $\pm$ 1.6e3 | 2.9e6 $\pm$ 2.5e6 | 8.9e3 $\pm$ 7.7e3 | 1.02e3 $\pm$ 0.9e3      |
| 15  | 100 $\pm$ 0       | 3.7e7 $\pm$ 3e7   | 2.1e3 $\pm$ 1.7e3 | 3.6e6 $\pm$ 3e6   | 1e4 $\pm$ 0.8e4   | 1.17e3 $\pm$ 1e3        |
| 16  | 100 $\pm$ 0       | 4.5e7 $\pm$ 3.6e7 | 2.2e3 $\pm$ 1.8e3 | 4.3e6 $\pm$ 3.4e6 | 1.2e4 $\pm$ 0.9e4 | 1.39e3 $\pm$ 1.1e3      |
| 17  | 100 $\pm$ 0       | 5.4e7 $\pm$ 4.3e7 | 2.4e3 $\pm$ 1.9e3 | 5.1e6 $\pm$ 4.3e6 | 1.3e4 $\pm$ 1.1e4 | 1.58e3 $\pm$ 1.3e3      |
| 18  | 100 $\pm$ 0       | 6.1e7 $\pm$ 4.7e7 | 2.4e3 $\pm$ 1.9e3 | 5.6e6 $\pm$ 4.3e6 | 1.3e4 $\pm$ 1e4   | 1.8e3 $\pm$ 1.5e3       |
| 19  | 100 $\pm$ 0       | 6.7e7 $\pm$ 5e7   | 2.4e3 $\pm$ 1.8e3 | 6e6 $\pm$ 4.5e6   | 1.3e4 $\pm$ 1e4   | 1.97e3 $\pm$ 1.5e3      |
| 20  | 100 $\pm$ 0       | 7.6e7 $\pm$ 5.5e7 | 2.5e3 $\pm$ 1.8e3 | 6.9e6 $\pm$ 5e6   | 1.5e4 $\pm$ 1.1e4 | 2.06e3 $\pm$ 1.5e3      |
| 21  | 100 $\pm$ 0       | 8.4e7 $\pm$ 5.6e7 | 2.5e3 $\pm$ 1.7e3 | 7.6e6 $\pm$ 5e6   | 1.6e4 $\pm$ 1e4   | 2.22e3 $\pm$ 1.6e3      |
| 22  | 100 $\pm$ 0       | 9.2e7 $\pm$ 6e7   | 2.5e3 $\pm$ 1.6e3 | 8.2e6 $\pm$ 5.4e6 | 1.6e4 $\pm$ 1.1e4 | 2.38e3 $\pm$ 1.6e3      |
| 23  | 100 $\pm$ 0       | 1e8 $\pm$ 0.6e8   | 2.5e3 $\pm$ 1.6e3 | 8.9e6 $\pm$ 5.5e6 | 1.7e4 $\pm$ 1e4   | 2.49e3 $\pm$ 1.6e3      |
| 24  | 100 $\pm$ 0       | 1.1e8 $\pm$ 0.6e8 | 2.5e3 $\pm$ 1.4e3 | 9.3e6 $\pm$ 5.5e6 | 1.6e4 $\pm$ 1e4   | 2.64e3 $\pm$ 1.6e3      |
| 25  | 100 $\pm$ 0       | 1.1e8 $\pm$ 0.7e8 | 2.4e3 $\pm$ 1.4e3 | 9.9e6 $\pm$ 6e6   | 1.7e4 $\pm$ 1e4   | 2.68e3 $\pm$ 1.6e3      |
| 26  | 100 $\pm$ 0       | 1.2e8 $\pm$ 0.7e8 | 2.3e3 $\pm$ 1.3e3 | 1e7 $\pm$ 0.6e7   | 1.7e4 $\pm$ 1e4   | 2.79e3 $\pm$ 1.6e3      |
| 27  | 100 $\pm$ 0       | 1.2e8 $\pm$ 0.7e8 | 2.2e3 $\pm$ 1.2e3 | 1e7 $\pm$ 0.6e7   | 1.6e4 $\pm$ 0.9e4 | 2.78e3 $\pm$ 1.6e3      |
| 28  | 100 $\pm$ 0       | 1.2e8 $\pm$ 0.7e8 | 2.1e3 $\pm$ 1.1e3 | 1e7 $\pm$ 0.6e7   | 1.6e4 $\pm$ 0.8e4 | 2.76e3 $\pm$ 1.5e3      |
| 29  | 100 $\pm$ 0       | 1.3e8 $\pm$ 0.7e8 | 2.1e3 $\pm$ 1e3   | 1.1e7 $\pm$ 0.6e7 | 1.6e4 $\pm$ 0.8e4 | 2.74e3 $\pm$ 1.4e3      |
| 30  | 100 $\pm$ 0       | 1.3e8 $\pm$ 0.6e8 | 2e3 $\pm$ 1e3     | 1.1e7 $\pm$ 0.6e7 | 1.6e4 $\pm$ 0.8e4 | 2.77e3 $\pm$ 1.4e3      |
| 31  | 100 $\pm$ 0       | 1.4e8 $\pm$ 0.7e8 | 1.9e3 $\pm$ 0.9e3 | 1.2e7 $\pm$ 0.6e7 | 1.6e4 $\pm$ 0.8e4 | 2.76e3 $\pm$ 1.3e3      |
| 32  | 100 $\pm$ 0       | 1.4e8 $\pm$ 0.7e8 | 1.8e3 $\pm$ 0.9e3 | 1.2e7 $\pm$ 0.6e7 | 1.5e4 $\pm$ 0.7e4 | 2.78e3 $\pm$ 1.3e3      |
| 33  | 100 $\pm$ 0       | 1.4e8 $\pm$ 0.6e8 | 1.8e3 $\pm$ 0.8e3 | 1.2e7 $\pm$ 0.5e7 | 1.5e4 $\pm$ 0.7e4 | 2.72e3 $\pm$ 1.3e3      |
| 34  | 100 $\pm$ 0       | 1.4e8 $\pm$ 0.6e8 | 1.6e3 $\pm$ 0.7e3 | 1.1e7 $\pm$ 0.5e7 | 1.4e4 $\pm$ 0.7e4 | 2.65e3 $\pm$ 1.2e3      |
| 35  | 100 $\pm$ 0       | 1.4e8 $\pm$ 0.6e8 | 1.6e3 $\pm$ 0.7e3 | 1.2e7 $\pm$ 0.6e7 | 1.4e4 $\pm$ 0.7e4 | 2.54e3 $\pm$ 1.1e3      |
| 36  | 100 $\pm$ 0       | 1.5e8 $\pm$ 0.6e8 | 1.5e3 $\pm$ 0.7e3 | 1.2e7 $\pm$ 0.6e7 | 1.4e4 $\pm$ 0.7e4 | 2.51e3 $\pm$ 1.1e3      |
| 37  | 100 $\pm$ 0       | 1.5e8 $\pm$ 0.6e8 | 1.4e3 $\pm$ 0.6e3 | 1.2e7 $\pm$ 0.6e7 | 1.4e4 $\pm$ 0.7e4 | 2.48e3 $\pm$ 1.1e3      |
| 38  | 100 $\pm$ 0       | 1.5e8 $\pm$ 0.6e8 | 1.4e3 $\pm$ 0.6e3 | 1.2e7 $\pm$ 0.6e7 | 1.3e4 $\pm$ 0.6e4 | 2.43e3 $\pm$ 1.1e3      |
| 39  | 100 $\pm$ 0       | 1.5e8 $\pm$ 0.6e8 | 1.3e3 $\pm$ 0.5e3 | 1.2e7 $\pm$ 0.5e7 | 1.3e4 $\pm$ 0.6e4 | 2.34e3 $\pm$ 1e3        |
| 40  | 100 $\pm$ 0       | 1.5e8 $\pm$ 0.6e8 | 1.2e3 $\pm$ 0.5e3 | 1.2e7 $\pm$ 0.5e7 | 1.3e4 $\pm$ 0.6e4 | 2.26e3 $\pm$ 1e3        |
| 41  | 100 $\pm$ 0       | 1.5e8 $\pm$ 0.6e8 | 1.2e3 $\pm$ 0.5e3 | 1.2e7 $\pm$ 0.5e7 | 1.2e4 $\pm$ 0.6e4 | 2.2e3 $\pm$ 0.9e3       |
| 42  | 100 $\pm$ 0       | 1.5e8 $\pm$ 0.6e8 | 1.1e3 $\pm$ 0.5e3 | 1.2e7 $\pm$ 0.5e7 | 1.3e4 $\pm$ 0.5e4 | 2.13e3 $\pm$ 0.9e3      |
| 43  | 100 $\pm$ 0       | 1.4e8 $\pm$ 0.6e8 | 1.1e3 $\pm$ 0.4e3 | 1.1e7 $\pm$ 0.5e7 | 1.2e4 $\pm$ 0.6e4 | 2.1e3 $\pm$ 0.9e3       |
| 44  | 100 $\pm$ 0       | 1.4e8 $\pm$ 0.6e8 | 1e3 $\pm$ 0.4e3   | 1.2e7 $\pm$ 0.5e7 | 1.2e4 $\pm$ 0.5e4 | 1.99e3 $\pm$ 0.8e3      |
| 45  | 100 $\pm$ 0       | 1.4e8 $\pm$ 0.6e8 | 9.5e2 $\pm$ 3.8e2 | 1.1e7 $\pm$ 0.5e7 | 1.2e4 $\pm$ 0.5e4 | 1.92e3 $\pm$ 0.8e3      |
| 46  | 100 $\pm$ 0       | 1.4e8 $\pm$ 0.6e8 | 9.2e2 $\pm$ 3.7e2 | 1.2e7 $\pm$ 0.5e7 | 1.2e4 $\pm$ 0.5e4 | 1.84e3 $\pm$ 0.7e3      |
| 47  | 100 $\pm$ 0       | 1.4e8 $\pm$ 0.6e8 | 8.8e2 $\pm$ 3.6e2 | 1.1e7 $\pm$ 0.5e7 | 1.1e4 $\pm$ 0.5e4 | 1.81e3 $\pm$ 0.7e3      |
| 48  | 100 $\pm$ 0       | 1.4e8 $\pm$ 0.6e8 | 8.5e2 $\pm$ 3.5e2 | 1.2e7 $\pm$ 0.5e7 | 1.2e4 $\pm$ 0.5e4 | 1.75e3 $\pm$ 0.7e3      |

The average of the prevalence, the CFU-values per square meter (cfu/sqm) and per gram manure are calculated over all iterations. The CFU values in the intestine as well as the excreted and ingested quantities are obtained by calculating the average over all animals in one iteration at first and then over all iterations.

**Table S10b (log<sub>10</sub> CFU). Calculated numeric values for scenario when day-old chicks are set positive (10<sup>2</sup> CFU bacteria per chick on day 1), measure slow growing breed. Setting: 90 chicks, 18 seeder, 72 sentinels, Rowan x Ranger, feeding duration 47 days, stocking density 39 kg/m<sup>2</sup>; 1000 g litter/m<sup>2</sup>**

| day | prevalence in % | cfu/sqm           | cfu/g manure      | cfu in intestine  | cfu/g feces       | cfu ingested per animal |
|-----|-----------------|-------------------|-------------------|-------------------|-------------------|-------------------------|
|     | (% mean ± sd)   | (log10 mean ± sd) | (log10 mean ± sd) | (log10 mean ± sd) | (log10 mean ± sd) | (log10 mean ± sd)       |
| 1   | 0 ± 0           | -Inf ± -Inf       | -Inf ± -Inf       | -Inf ± -Inf       | -Inf ± -Inf       | 1.3 ± 0                 |
| 2   | 19.12 ± 0.87    | 4.95 ± 4.78       | 1.86 ± 1.69       | 4.17 ± 3.99       | 3.31 ± 3.13       | -Inf ± 0                |
| 3   | 87.49 ± 12.77   | 5.45 ± 5.24       | 2.17 ± 1.97       | 4.59 ± 4.38       | 2.57 ± 2.36       | 1.36 ± 1.19             |
| 4   | 96.36 ± 8.11    | 5.8 ± 5.63        | 2.38 ± 2.21       | 4.9 ± 4.76        | 2.82 ± 2.67       | 1.61 ± 1.41             |
| 5   | 98.67 ± 4.02    | 6.08 ± 5.95       | 2.54 ± 2.41       | 5.16 ± 5.05       | 3.05 ± 2.93       | 1.82 ± 1.66             |
| 6   | 99.59 ± 1.82    | 6.31 ± 6.2        | 2.69 ± 2.59       | 5.37 ± 5.27       | 3.33 ± 3.24       | 2.03 ± 1.9              |
| 7   | 99.71 ± 1.35    | 6.52 ± 6.41       | 2.82 ± 2.71       | 5.57 ± 5.48       | 3.38 ± 3.28       | 2.2 ± 2.09              |
| 8   | 99.91 ± 0.54    | 6.7 ± 6.62        | 2.91 ± 2.83       | 5.74 ± 5.68       | 3.49 ± 3.43       | 2.36 ± 2.25             |
| 9   | 99.9 ± 0.53     | 6.87 ± 6.76       | 3.01 ± 2.9        | 5.91 ± 5.8        | 3.61 ± 3.51       | 2.51 ± 2.42             |
| 10  | 99.92 ± 0.51    | 7.03 ± 6.94       | 3.09 ± 3          | 6.05 ± 5.99       | 3.71 ± 3.64       | 2.63 ± 2.52             |
| 11  | 99.98 ± 0.16    | 7.18 ± 7.11       | 3.16 ± 3.1        | 6.2 ± 6.16        | 3.79 ± 3.75       | 2.75 ± 2.67             |
| 12  | 99.99 ± 0.11    | 7.29 ± 7.24       | 3.21 ± 3.16       | 6.29 ± 6.25       | 3.85 ± 3.81       | 2.85 ± 2.79             |
| 13  | 99.98 ± 0.16    | 7.39 ± 7.31       | 3.25 ± 3.17       | 6.38 ± 6.3        | 3.9 ± 3.83        | 2.94 ± 2.88             |
| 14  | 100 ± 0         | 7.48 ± 7.4        | 3.28 ± 3.21       | 6.46 ± 6.4        | 3.95 ± 3.89       | 3.01 ± 2.93             |
| 15  | 100 ± 0         | 7.57 ± 7.48       | 3.32 ± 3.23       | 6.56 ± 6.47       | 4.01 ± 3.93       | 3.07 ± 2.99             |
| 16  | 100 ± 0         | 7.65 ± 7.55       | 3.35 ± 3.25       | 6.63 ± 6.53       | 4.07 ± 3.97       | 3.14 ± 3.06             |
| 17  | 100 ± 0         | 7.73 ± 7.64       | 3.38 ± 3.28       | 6.71 ± 6.63       | 4.11 ± 4.03       | 3.2 ± 3.1               |
| 18  | 100 ± 0         | 7.79 ± 7.67       | 3.38 ± 3.27       | 6.75 ± 6.63       | 4.12 ± 4          | 3.25 ± 3.16             |
| 19  | 100 ± 0         | 7.83 ± 7.7        | 3.38 ± 3.25       | 6.78 ± 6.66       | 4.13 ± 4          | 3.29 ± 3.18             |
| 20  | 100 ± 0         | 7.88 ± 7.74       | 3.39 ± 3.25       | 6.84 ± 6.7        | 4.18 ± 4.04       | 3.31 ± 3.18             |
| 21  | 100 ± 0         | 7.93 ± 7.75       | 3.4 ± 3.22        | 6.88 ± 6.7        | 4.19 ± 4.01       | 3.35 ± 3.2              |
| 22  | 100 ± 0         | 7.97 ± 7.78       | 3.4 ± 3.21        | 6.91 ± 6.73       | 4.21 ± 4.03       | 3.38 ± 3.2              |
| 23  | 100 ± 0         | 8 ± 7.79          | 3.4 ± 3.19        | 6.95 ± 6.74       | 4.22 ± 4.02       | 3.4 ± 3.21              |
| 24  | 100 ± 0         | 8.03 ± 7.8        | 3.39 ± 3.16       | 6.97 ± 6.74       | 4.21 ± 3.98       | 3.42 ± 3.21             |
| 25  | 100 ± 0         | 8.06 ± 7.83       | 3.39 ± 3.15       | 7 ± 6.78          | 4.23 ± 4.01       | 3.43 ± 3.2              |
| 26  | 100 ± 0         | 8.07 ± 7.82       | 3.37 ± 3.12       | 7 ± 6.75          | 4.23 ± 3.98       | 3.45 ± 3.21             |
| 27  | 100 ± 0         | 8.08 ± 7.82       | 3.35 ± 3.09       | 7 ± 6.76          | 4.21 ± 3.96       | 3.44 ± 3.19             |
| 28  | 100 ± 0         | 8.1 ± 7.81        | 3.33 ± 3.05       | 7.02 ± 6.75       | 4.2 ± 3.93        | 3.44 ± 3.18             |
| 29  | 100 ± 0         | 8.12 ± 7.82       | 3.32 ± 3.02       | 7.05 ± 6.76       | 4.21 ± 3.92       | 3.44 ± 3.16             |
| 30  | 100 ± 0         | 8.13 ± 7.81       | 3.3 ± 2.98        | 7.05 ± 6.75       | 4.2 ± 3.91        | 3.44 ± 3.14             |
| 31  | 100 ± 0         | 8.14 ± 7.83       | 3.29 ± 2.97       | 7.07 ± 6.78       | 4.21 ± 3.92       | 3.44 ± 3.12             |
| 32  | 100 ± 0         | 8.15 ± 7.82       | 3.27 ± 2.94       | 7.07 ± 6.76       | 4.18 ± 3.87       | 3.44 ± 3.13             |
| 33  | 100 ± 0         | 8.15 ± 7.81       | 3.24 ± 2.9        | 7.07 ± 6.74       | 4.17 ± 3.84       | 3.43 ± 3.11             |
| 34  | 100 ± 0         | 8.15 ± 7.79       | 3.21 ± 2.86       | 7.05 ± 6.72       | 4.15 ± 3.81       | 3.42 ± 3.08             |
| 35  | 100 ± 0         | 8.16 ± 7.8        | 3.2 ± 2.84        | 7.08 ± 6.75       | 4.16 ± 3.83       | 3.4 ± 3.05              |
| 36  | 100 ± 0         | 8.16 ± 7.81       | 3.18 ± 2.83       | 7.08 ± 6.77       | 4.16 ± 3.84       | 3.4 ± 3.05              |
| 37  | 100 ± 0         | 8.17 ± 7.81       | 3.16 ± 2.8        | 7.08 ± 6.75       | 4.15 ± 3.82       | 3.39 ± 3.04             |
| 38  | 100 ± 0         | 8.17 ± 7.8        | 3.14 ± 2.77       | 7.08 ± 6.74       | 4.13 ± 3.79       | 3.38 ± 3.03             |
| 39  | 100 ± 0         | 8.16 ± 7.79       | 3.11 ± 2.74       | 7.07 ± 6.73       | 4.11 ± 3.77       | 3.37 ± 3.01             |
| 40  | 100 ± 0         | 8.17 ± 7.79       | 3.09 ± 2.71       | 7.08 ± 6.72       | 4.12 ± 3.76       | 3.35 ± 2.98             |
| 41  | 100 ± 0         | 8.16 ± 7.78       | 3.07 ± 2.69       | 7.07 ± 6.72       | 4.09 ± 3.74       | 3.34 ± 2.96             |
| 42  | 100 ± 0         | 8.17 ± 7.78       | 3.06 ± 2.67       | 7.09 ± 6.72       | 4.1 ± 3.73        | 3.33 ± 2.95             |
| 43  | 100 ± 0         | 8.16 ± 7.78       | 3.02 ± 2.65       | 7.06 ± 6.73       | 4.07 ± 3.75       | 3.32 ± 2.93             |
| 44  | 100 ± 0         | 8.15 ± 7.76       | 3 ± 2.61          | 7.06 ± 6.7        | 4.08 ± 3.71       | 3.3 ± 2.92              |
| 45  | 100 ± 0         | 8.15 ± 7.75       | 2.98 ± 2.58       | 7.06 ± 6.69       | 4.07 ± 3.69       | 3.28 ± 2.89             |
| 46  | 100 ± 0         | 8.15 ± 7.76       | 2.97 ± 2.57       | 7.07 ± 6.72       | 4.07 ± 3.71       | 3.27 ± 2.86             |
| 47  | 100 ± 0         | 8.15 ± 7.76       | 2.95 ± 2.56       | 7.06 ± 6.7        | 4.06 ± 3.7        | 3.26 ± 2.86             |
| 48  | 100 ± 0         | 8.15 ± 7.77       | 2.93 ± 2.55       | 7.07 ± 6.73       | 4.06 ± 3.72       | 3.24 ± 2.85             |

The average of the prevalence, the CFU-values per square meter (cfu/sqm) and per gram manure are calculated over all iterations. The CFU values in the intestine as well as the excreted and ingested quantities are obtained by calculating the average over all animals in one iteration at first and then over all iterations. The decadic logarithm of zero or negative values is negative infinite (-Inf).

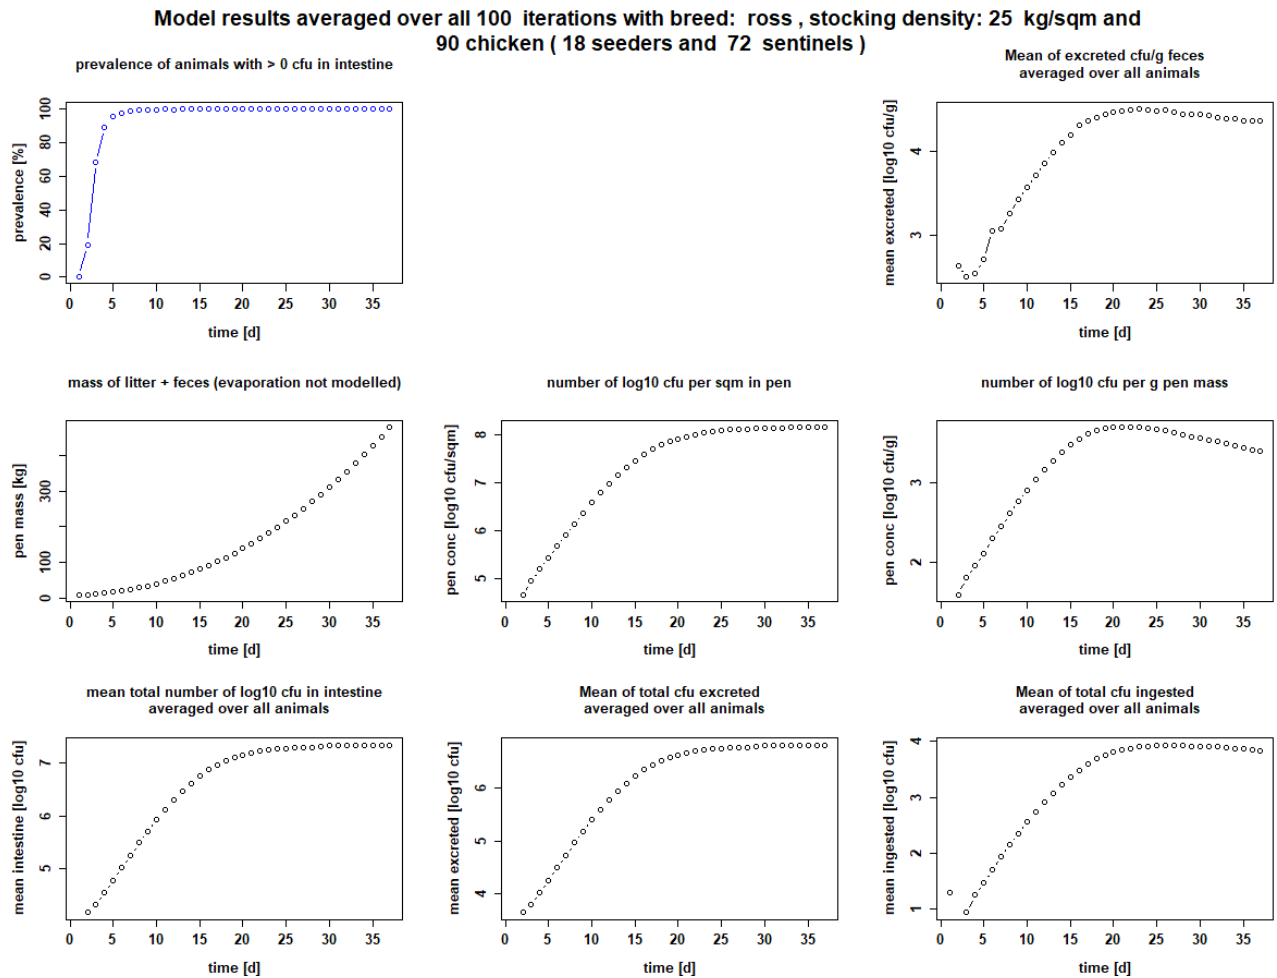

**Figure S11. Calculated infection dynamic when day-old chicks are set positive ( $10^2$  CFU bacteria per chick on day 1), measure stocking density  $25 \text{ kg/m}^2$ . Dotplots with results for 90 chicks, 18 seeder, 72 sentinels, Ross 308, feeding duration 36 days, stocking density  $25 \text{ kg/m}^2$ ,  $1000 \text{ g litter/m}^2$**

**Table S11a (CFU). Calculated numeric values for scenario when day-old chicks are set positive ( $10^2$  CFU bacteria per chick on day 1), measure stocking density 25 kg/m<sup>2</sup>. Setting: 90 chicks, 18 seeder, 72 sentinels, Ross 308, feeding duration 36 days; stocking density 25 kg/m<sup>2</sup>, 1000 g litter/m<sup>2</sup>**

| day | prevalence in %   | cfu/sqm           | cfu/g manure      | cfu in intestine  | cfu/g feces       | cfu ingested per animal |
|-----|-------------------|-------------------|-------------------|-------------------|-------------------|-------------------------|
|     | (mean $\pm$ sd)         |
| 1   | 0 $\pm$ 0         | 0e0 $\pm$ 0       | 0e0 $\pm$ 0       | 0e0 $\pm$ 0       | 0e0 $\pm$ 0       | 2e1 $\pm$ 0e1           |
| 2   | 19.24 $\pm$ 0.92  | 4.7e4 $\pm$ 2.8e4 | 3.8e1 $\pm$ 2.3e1 | 1.4e4 $\pm$ 0.9e4 | 4.3e2 $\pm$ 2.7e2 | 0e0 $\pm$ 0             |
| 3   | 68.63 $\pm$ 24.76 | 8.9e4 $\pm$ 4.5e4 | 6.2e1 $\pm$ 3.2e1 | 2e4 $\pm$ 1.1e4   | 3.1e2 $\pm$ 1.7e2 | 8.61 $\pm$ 5.6          |
| 4   | 89.43 $\pm$ 12.88 | 1.6e5 $\pm$ 0.8e5 | 9.1e1 $\pm$ 4.8e1 | 3.5e4 $\pm$ 2e4   | 3.5e2 $\pm$ 2e2   | 1.79e1 $\pm$ 0.9e1      |
| 5   | 95.7 $\pm$ 9.4    | 2.7e5 $\pm$ 1.6e5 | 1.3e2 $\pm$ 0.8e2 | 5.9e4 $\pm$ 3.8e4 | 5.1e2 $\pm$ 3.2e2 | 3e1 $\pm$ 1.6e1         |
| 6   | 98.04 $\pm$ 6.89  | 4.7e5 $\pm$ 3.1e5 | 2e2 $\pm$ 1.3e2   | 1.1e5 $\pm$ 0.7e5 | 1.1e3 $\pm$ 0.8e3 | 4.95e1 $\pm$ 2.9e1      |
| 7   | 99.16 $\pm$ 4.15  | 8.1e5 $\pm$ 5.1e5 | 2.8e2 $\pm$ 1.8e2 | 1.8e5 $\pm$ 1.2e5 | 1.2e3 $\pm$ 0.8e3 | 8.71e1 $\pm$ 5.7e1      |
| 8   | 99.69 $\pm$ 1.75  | 1.4e6 $\pm$ 1e6   | 4e2 $\pm$ 2.8e2   | 3.1e5 $\pm$ 2.2e5 | 1.8e3 $\pm$ 1.3e3 | 1.4e2 $\pm$ 0.9e2       |
| 9   | 99.83 $\pm$ 1.2   | 2.3e6 $\pm$ 1.6e6 | 5.8e2 $\pm$ 3.9e2 | 5.1e5 $\pm$ 3.6e5 | 2.7e3 $\pm$ 1.9e3 | 2.25e2 $\pm$ 1.6e2      |
| 10  | 99.96 $\pm$ 0.31  | 3.8e6 $\pm$ 2.7e6 | 8e2 $\pm$ 5.7e2   | 8.3e5 $\pm$ 6.2e5 | 3.7e3 $\pm$ 2.8e3 | 3.62e2 $\pm$ 2.5e2      |
| 11  | 100 $\pm$ 0       | 6.1e6 $\pm$ 4.4e6 | 1.1e3 $\pm$ 0.8e3 | 1.3e6 $\pm$ 1e6   | 5.1e3 $\pm$ 3.8e3 | 5.51e2 $\pm$ 3.9e2      |
| 12  | 99.99 $\pm$ 0.11  | 9.5e6 $\pm$ 6.9e6 | 1.5e3 $\pm$ 1.1e3 | 2e6 $\pm$ 1.5e6   | 7.2e3 $\pm$ 5.4e3 | 8.25e2 $\pm$ 6e2        |
| 13  | 100 $\pm$ 0       | 1.4e7 $\pm$ 1e7   | 1.9e3 $\pm$ 1.4e3 | 2.9e6 $\pm$ 2.1e6 | 9.7e3 $\pm$ 7.1e3 | 1.18e3 $\pm$ 0.9e3      |
| 14  | 100 $\pm$ 0       | 2.1e7 $\pm$ 1.4e7 | 2.4e3 $\pm$ 1.7e3 | 4.2e6 $\pm$ 3e6   | 1.3e4 $\pm$ 0.9e4 | 1.67e3 $\pm$ 1.2e3      |
| 15  | 100 $\pm$ 0       | 2.9e7 $\pm$ 1.9e7 | 3e3 $\pm$ 2e3     | 5.7e6 $\pm$ 3.8e6 | 1.6e4 $\pm$ 1.1e4 | 2.33e3 $\pm$ 1.6e3      |
| 16  | 100 $\pm$ 0       | 3.9e7 $\pm$ 2.4e7 | 3.6e3 $\pm$ 2.2e3 | 7.6e6 $\pm$ 4.6e6 | 2.1e4 $\pm$ 1.2e4 | 3.07e3 $\pm$ 2e3        |
| 17  | 100 $\pm$ 0       | 5e7 $\pm$ 2.9e7   | 4.1e3 $\pm$ 2.4e3 | 9.4e6 $\pm$ 5.5e6 | 2.3e4 $\pm$ 1.4e4 | 3.95e3 $\pm$ 2.4e3      |
| 18  | 100 $\pm$ 0       | 6.1e7 $\pm$ 3.1e7 | 4.5e3 $\pm$ 2.3e3 | 1.1e7 $\pm$ 0.6e7 | 2.6e4 $\pm$ 1.3e4 | 4.85e3 $\pm$ 2.8e3      |
| 19  | 100 $\pm$ 0       | 7.2e7 $\pm$ 3.3e7 | 4.8e3 $\pm$ 2.2e3 | 1.3e7 $\pm$ 0.6e7 | 2.8e4 $\pm$ 1.3e4 | 5.66e3 $\pm$ 2.9e3      |
| 20  | 100 $\pm$ 0       | 8.2e7 $\pm$ 3.5e7 | 4.9e3 $\pm$ 2.1e3 | 1.4e7 $\pm$ 0.6e7 | 3e4 $\pm$ 1.3e4   | 6.43e3 $\pm$ 3e3        |
| 21  | 100 $\pm$ 0       | 9e7 $\pm$ 3.5e7   | 5e3 $\pm$ 1.9e3   | 1.5e7 $\pm$ 0.6e7 | 3e4 $\pm$ 1.2e4   | 7.04e3 $\pm$ 3e3        |
| 22  | 100 $\pm$ 0       | 9.9e7 $\pm$ 3.4e7 | 5e3 $\pm$ 1.7e3   | 1.7e7 $\pm$ 0.6e7 | 3.2e4 $\pm$ 1.1e4 | 7.5e3 $\pm$ 2.9e3       |
| 23  | 100 $\pm$ 0       | 1.1e8 $\pm$ 0.3e8 | 4.9e3 $\pm$ 1.5e3 | 1.8e7 $\pm$ 0.6e7 | 3.2e4 $\pm$ 1e4   | 7.95e3 $\pm$ 2.8e3      |
| 24  | 100 $\pm$ 0       | 1.2e8 $\pm$ 0.3e8 | 4.9e3 $\pm$ 1.4e3 | 1.9e7 $\pm$ 0.6e7 | 3.2e4 $\pm$ 1e4   | 8.29e3 $\pm$ 2.5e3      |
| 25  | 100 $\pm$ 0       | 1.2e8 $\pm$ 0.3e8 | 4.7e3 $\pm$ 1.2e3 | 1.9e7 $\pm$ 0.5e7 | 3.1e4 $\pm$ 0.9e4 | 8.54e3 $\pm$ 2.5e3      |
| 26  | 100 $\pm$ 0       | 1.2e8 $\pm$ 0.3e8 | 4.5e3 $\pm$ 1.1e3 | 2e7 $\pm$ 0.5e7   | 3.2e4 $\pm$ 0.8e4 | 8.54e3 $\pm$ 2.3e3      |
| 27  | 100 $\pm$ 0       | 1.3e8 $\pm$ 0.3e8 | 4.2e3 $\pm$ 0.9e3 | 2e7 $\pm$ 0.5e7   | 2.9e4 $\pm$ 0.7e4 | 8.64e3 $\pm$ 2.1e3      |
| 28  | 100 $\pm$ 0       | 1.3e8 $\pm$ 0.3e8 | 4e3 $\pm$ 0.8e3   | 2e7 $\pm$ 0.5e7   | 2.8e4 $\pm$ 0.7e4 | 8.45e3 $\pm$ 1.8e3      |
| 29  | 100 $\pm$ 0       | 1.3e8 $\pm$ 0.3e8 | 3.8e3 $\pm$ 0.7e3 | 2.1e7 $\pm$ 0.5e7 | 2.8e4 $\pm$ 0.7e4 | 8.28e3 $\pm$ 1.7e3      |
| 30  | 100 $\pm$ 0       | 1.3e8 $\pm$ 0.2e8 | 3.6e3 $\pm$ 0.7e3 | 2.1e7 $\pm$ 0.5e7 | 2.8e4 $\pm$ 0.6e4 | 8.2e3 $\pm$ 1.6e3       |
| 31  | 100 $\pm$ 0       | 1.4e8 $\pm$ 0.2e8 | 3.4e3 $\pm$ 0.6e3 | 2.1e7 $\pm$ 0.4e7 | 2.7e4 $\pm$ 0.5e4 | 8.15e3 $\pm$ 1.5e3      |
| 32  | 100 $\pm$ 0       | 1.4e8 $\pm$ 0.2e8 | 3.3e3 $\pm$ 0.5e3 | 2.2e7 $\pm$ 0.4e7 | 2.6e4 $\pm$ 0.5e4 | 7.95e3 $\pm$ 1.4e3      |
| 33  | 100 $\pm$ 0       | 1.4e8 $\pm$ 0.2e8 | 3.1e3 $\pm$ 0.5e3 | 2.2e7 $\pm$ 0.4e7 | 2.5e4 $\pm$ 0.5e4 | 7.76e3 $\pm$ 1.2e3      |
| 34  | 100 $\pm$ 0       | 1.4e8 $\pm$ 0.2e8 | 2.9e3 $\pm$ 0.4e3 | 2.2e7 $\pm$ 0.4e7 | 2.5e4 $\pm$ 0.5e4 | 7.51e3 $\pm$ 1.1e3      |
| 35  | 100 $\pm$ 0       | 1.4e8 $\pm$ 0.2e8 | 2.7e3 $\pm$ 0.4e3 | 2.2e7 $\pm$ 0.4e7 | 2.4e4 $\pm$ 0.5e4 | 7.35e3 $\pm$ 1e3        |
| 36  | 100 $\pm$ 0       | 1.4e8 $\pm$ 0.2e8 | 2.6e3 $\pm$ 0.4e3 | 2.2e7 $\pm$ 0.4e7 | 2.3e4 $\pm$ 0.5e4 | 7.12e3 $\pm$ 1e3        |
| 37  | 100 $\pm$ 0       | 1.4e8 $\pm$ 0.2e8 | 2.5e3 $\pm$ 0.3e3 | 2.2e7 $\pm$ 0.4e7 | 2.3e4 $\pm$ 0.5e4 | 6.89e3 $\pm$ 0.9e3      |

The average of the prevalence, the CFU-values per square meter (cfu/sqm) and per gram manure are calculated over all iterations. The CFU values in the intestine as well as the excreted and ingested quantities are obtained by calculating the average over all animals in one iteration at first and then over all iterations.



**Table S11b (log<sub>10</sub> CFU). Calculated numeric values for scenario when day-old chicks are set positive (10<sup>2</sup> CFU bacteria per chick on day 1), measure stocking density 25 kg/m<sup>2</sup>. Setting: 90 chicks, 18 seeder, 72 sentinels, Ross 308, feeding duration 36 days; stocking density 25 kg/m<sup>2</sup>, 1000 g litter/m<sup>2</sup>**

| day | prevalence in % | cfu/sqm           | cfu/g manure      | cfu in intestine  | cfu/g feces       | cfu ingested per animal |
|-----|-----------------|-------------------|-------------------|-------------------|-------------------|-------------------------|
|     | (% mean ± sd)   | (log10 mean ± sd) | (log10 mean ± sd) | (log10 mean ± sd) | (log10 mean ± sd) | (log10 mean ± sd)       |
| 1   | 0 ± 0           | -Inf ± -Inf       | -Inf ± -Inf       | -Inf ± -Inf       | -Inf ± -Inf       | 1.3 ± 0                 |
| 2   | 19.24 ± 0.92    | 4.67 ± 4.45       | 1.58 ± 1.37       | 4.16 ± 3.95       | 2.64 ± 2.42       | -Inf ± 0                |
| 3   | 68.63 ± 24.76   | 4.95 ± 4.66       | 1.8 ± 1.5         | 4.31 ± 4.03       | 2.5 ± 2.22        | 0.94 ± 0.75             |
| 4   | 89.43 ± 12.88   | 5.2 ± 4.92        | 1.96 ± 1.68       | 4.55 ± 4.29       | 2.55 ± 2.29       | 1.25 ± 0.97             |
| 5   | 95.7 ± 9.4      | 5.43 ± 5.2        | 2.11 ± 1.88       | 4.77 ± 4.57       | 2.71 ± 2.51       | 1.48 ± 1.2              |
| 6   | 98.04 ± 6.89    | 5.68 ± 5.49       | 2.29 ± 2.11       | 5.02 ± 4.87       | 3.04 ± 2.89       | 1.69 ± 1.47             |
| 7   | 99.16 ± 4.15    | 5.91 ± 5.71       | 2.45 ± 2.25       | 5.25 ± 5.06       | 3.07 ± 2.88       | 1.94 ± 1.76             |
| 8   | 99.69 ± 1.75    | 6.14 ± 5.98       | 2.61 ± 2.44       | 5.49 ± 5.35       | 3.26 ± 3.12       | 2.15 ± 1.95             |
| 9   | 99.83 ± 1.2     | 6.37 ± 6.2        | 2.76 ± 2.59       | 5.71 ± 5.55       | 3.43 ± 3.28       | 2.35 ± 2.19             |
| 10  | 99.96 ± 0.31    | 6.58 ± 6.43       | 2.91 ± 2.75       | 5.92 ± 5.79       | 3.57 ± 3.44       | 2.56 ± 2.39             |
| 11  | 100 ± 0         | 6.79 ± 6.64       | 3.04 ± 2.9        | 6.12 ± 5.99       | 3.71 ± 3.58       | 2.74 ± 2.59             |
| 12  | 99.99 ± 0.11    | 6.98 ± 6.84       | 3.16 ± 3.03       | 6.3 ± 6.18        | 3.85 ± 3.73       | 2.92 ± 2.77             |
| 13  | 100 ± 0         | 7.15 ± 7.01       | 3.28 ± 3.13       | 6.47 ± 6.33       | 3.99 ± 3.85       | 3.07 ± 2.94             |
| 14  | 100 ± 0         | 7.31 ± 7.16       | 3.38 ± 3.23       | 6.62 ± 6.48       | 4.1 ± 3.96        | 3.22 ± 3.08             |
| 15  | 100 ± 0         | 7.46 ± 7.28       | 3.47 ± 3.29       | 6.76 ± 6.58       | 4.2 ± 4.02        | 3.37 ± 3.21             |
| 16  | 100 ± 0         | 7.59 ± 7.38       | 3.55 ± 3.34       | 6.88 ± 6.66       | 4.31 ± 4.1        | 3.49 ± 3.31             |
| 17  | 100 ± 0         | 7.69 ± 7.46       | 3.61 ± 3.38       | 6.97 ± 6.74       | 4.37 ± 4.13       | 3.6 ± 3.38              |
| 18  | 100 ± 0         | 7.78 ± 7.5        | 3.65 ± 3.36       | 7.05 ± 6.74       | 4.41 ± 4.1        | 3.69 ± 3.45             |
| 19  | 100 ± 0         | 7.86 ± 7.52       | 3.68 ± 3.35       | 7.11 ± 6.77       | 4.45 ± 4.11       | 3.75 ± 3.46             |
| 20  | 100 ± 0         | 7.91 ± 7.54       | 3.69 ± 3.32       | 7.15 ± 6.78       | 4.47 ± 4.11       | 3.81 ± 3.48             |
| 21  | 100 ± 0         | 7.96 ± 7.55       | 3.7 ± 3.29        | 7.19 ± 6.79       | 4.48 ± 4.08       | 3.85 ± 3.48             |
| 22  | 100 ± 0         | 8 ± 7.54          | 3.7 ± 3.24        | 7.22 ± 6.76       | 4.5 ± 4.04        | 3.88 ± 3.47             |
| 23  | 100 ± 0         | 8.03 ± 7.52       | 3.69 ± 3.18       | 7.25 ± 6.75       | 4.5 ± 4           | 3.9 ± 3.44              |
| 24  | 100 ± 0         | 8.06 ± 7.53       | 3.69 ± 3.15       | 7.28 ± 6.78       | 4.5 ± 4           | 3.92 ± 3.41             |
| 25  | 100 ± 0         | 8.08 ± 7.5        | 3.67 ± 3.09       | 7.28 ± 6.73       | 4.49 ± 3.93       | 3.93 ± 3.4              |
| 26  | 100 ± 0         | 8.1 ± 7.48        | 3.65 ± 3.04       | 7.31 ± 6.72       | 4.5 ± 3.91        | 3.93 ± 3.35             |
| 27  | 100 ± 0         | 8.1 ± 7.43        | 3.63 ± 2.96       | 7.3 ± 6.66        | 4.47 ± 3.82       | 3.94 ± 3.32             |
| 28  | 100 ± 0         | 8.11 ± 7.43       | 3.6 ± 2.92        | 7.3 ± 6.7         | 4.45 ± 3.85       | 3.93 ± 3.26             |
| 29  | 100 ± 0         | 8.12 ± 7.41       | 3.58 ± 2.87       | 7.32 ± 6.69       | 4.45 ± 3.82       | 3.92 ± 3.24             |
| 30  | 100 ± 0         | 8.13 ± 7.39       | 3.56 ± 2.82       | 7.33 ± 6.68       | 4.45 ± 3.8        | 3.91 ± 3.21             |
| 31  | 100 ± 0         | 8.14 ± 7.37       | 3.54 ± 2.77       | 7.33 ± 6.63       | 4.43 ± 3.73       | 3.91 ± 3.17             |
| 32  | 100 ± 0         | 8.14 ± 7.32       | 3.51 ± 2.7        | 7.34 ± 6.59       | 4.41 ± 3.67       | 3.9 ± 3.13              |
| 33  | 100 ± 0         | 8.14 ± 7.31       | 3.49 ± 2.65       | 7.33 ± 6.64       | 4.39 ± 3.7        | 3.89 ± 3.07             |
| 34  | 100 ± 0         | 8.15 ± 7.3        | 3.46 ± 2.62       | 7.34 ± 6.65       | 4.4 ± 3.7         | 3.88 ± 3.04             |
| 35  | 100 ± 0         | 8.15 ± 7.28       | 3.44 ± 2.58       | 7.34 ± 6.62       | 4.37 ± 3.66       | 3.87 ± 3.02             |
| 36  | 100 ± 0         | 8.15 ± 7.28       | 3.42 ± 2.55       | 7.34 ± 6.64       | 4.37 ± 3.67       | 3.85 ± 2.99             |
| 37  | 100 ± 0         | 8.15 ± 7.29       | 3.39 ± 2.53       | 7.35 ± 6.65       | 4.36 ± 3.67       | 3.84 ± 2.97             |

The average of the prevalence, the CFU-values per square meter (cfu/sqm) and per gram manure are calculated over all iterations. The CFU values in the intestine as well as the excreted and ingested quantities are obtained by calculating the average over all animals in one iteration at first and then over all iterations. The decadic logarithm of zero or negative values is negative infinite (-Inf).

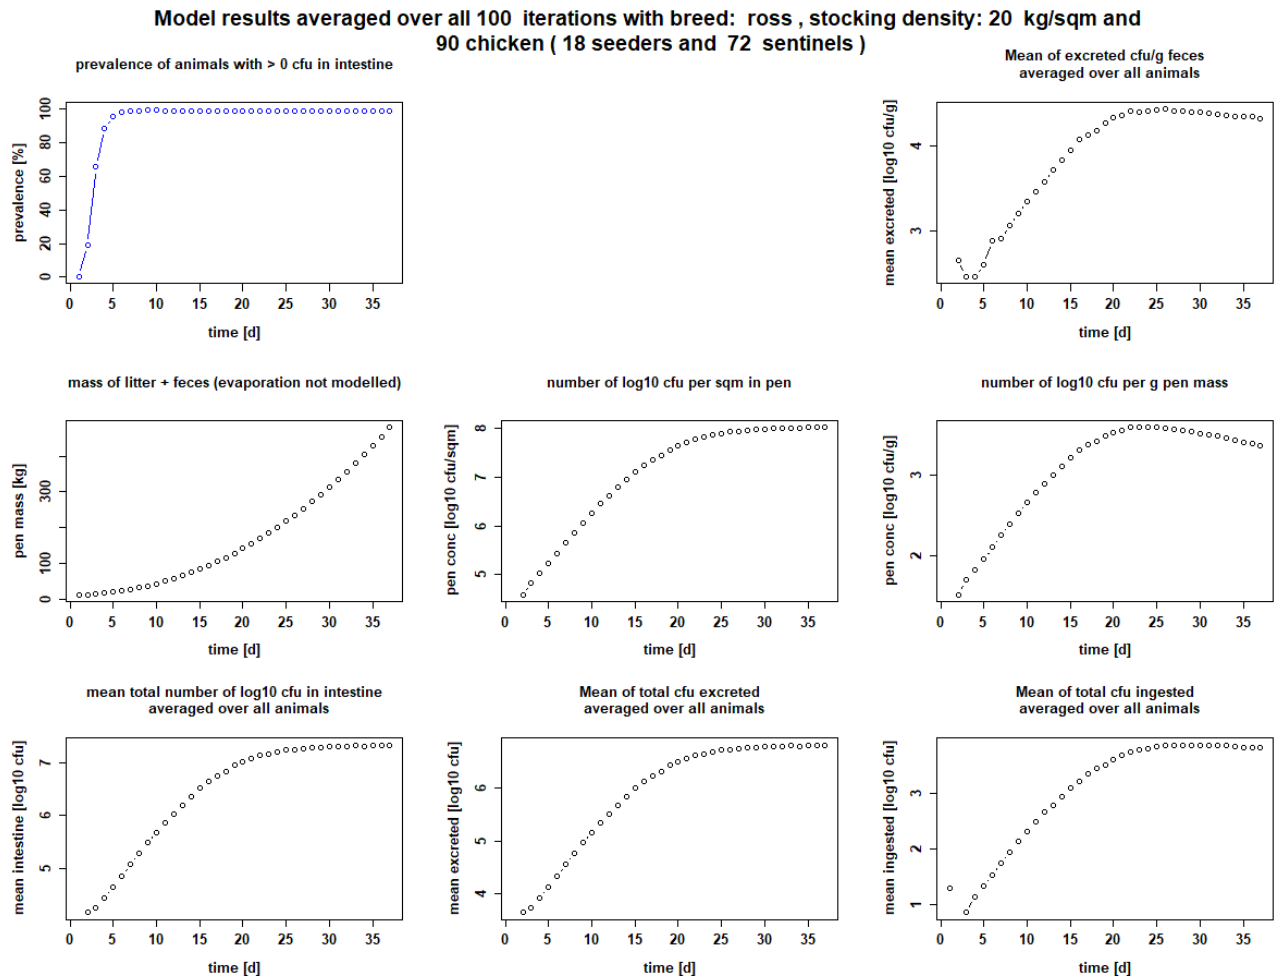

**Figure S12. Calculated infection dynamic when day-old chicks are set positive ( $10^2$  CFU bacteria per chick on day 1), measure stocking density  $20 \text{ kg/m}^2$ . Dotplots with results for 90 chicks, 18 seeder, 72 sentinels, Ross 308, feeding duration 36 days, stocking density  $20 \text{ kg/m}^2$ ,  $1000 \text{ g litter/m}^2$**

**Table S12a (CFU). Calculated numeric values for scenario when day-old chicks are set positive ( $10^2$  CFU bacteria per chick on day 1), measure stocking density 20 kg/m<sup>2</sup>. Setting: 90 chicks, 18 seeder, 72 sentinels, Ross 308, feeding duration 36 days; stocking density 20 kg/m<sup>2</sup>, 1000 g litter/m<sup>2</sup>**

| day | prevalence in %   | cfu/sqm           | cfu/g manure      | cfu in intestine  | cfu/g feces       | cfu ingested per animal |
|-----|-------------------|-------------------|-------------------|-------------------|-------------------|-------------------------|
|     | (mean $\pm$ sd)         |
| 1   | 0 $\pm$ 0         | 0e0 $\pm$ 0       | 0e0 $\pm$ 0       | 0e0 $\pm$ 0       | 0e0 $\pm$ 0       | 2e1 $\pm$ 0e1           |
| 2   | 19.08 $\pm$ 1.04  | 3.8e4 $\pm$ 2.3e4 | 3.3e1 $\pm$ 1.9e1 | 1.5e4 $\pm$ 0.9e4 | 4.5e2 $\pm$ 2.6e2 | 0e0 $\pm$ 0             |
| 3   | 65.72 $\pm$ 23.58 | 6.7e4 $\pm$ 2.9e4 | 5e1 $\pm$ 2.2e1   | 1.9e4 $\pm$ 0.8e4 | 2.9e2 $\pm$ 1.3e2 | 7.26 $\pm$ 4.6          |
| 4   | 88.5 $\pm$ 11.42  | 1.1e5 $\pm$ 0.5e5 | 6.6e1 $\pm$ 2.9e1 | 2.8e4 $\pm$ 1.3e4 | 2.8e2 $\pm$ 1.3e2 | 1.41e1 $\pm$ 0.6e1      |
| 5   | 95.91 $\pm$ 7.09  | 1.7e5 $\pm$ 0.9e5 | 9e1 $\pm$ 4.5e1   | 4.6e4 $\pm$ 2.5e4 | 3.9e2 $\pm$ 2.2e2 | 2.17e1 $\pm$ 1e1        |
| 6   | 98.21 $\pm$ 6.19  | 2.7e5 $\pm$ 1.4e5 | 1.3e2 $\pm$ 0.7e2 | 7.2e4 $\pm$ 3.9e4 | 7.5e2 $\pm$ 4.1e2 | 3.46e1 $\pm$ 1.8e1      |
| 7   | 99.04 $\pm$ 5.68  | 4.5e5 $\pm$ 2.7e5 | 1.8e2 $\pm$ 1.1e2 | 1.2e5 $\pm$ 0.8e5 | 8e2 $\pm$ 5.3e2   | 5.59e1 $\pm$ 2.9e1      |
| 8   | 99.31 $\pm$ 6.24  | 7.3e5 $\pm$ 4.4e5 | 2.5e2 $\pm$ 1.5e2 | 2e5 $\pm$ 1.2e5   | 1.2e3 $\pm$ 0.7e3 | 8.86e1 $\pm$ 5.3e1      |
| 9   | 99.42 $\pm$ 5.56  | 1.1e6 $\pm$ 0.7e6 | 3.3e2 $\pm$ 1.9e2 | 3e5 $\pm$ 1.8e5   | 1.6e3 $\pm$ 0.9e3 | 1.37e2 $\pm$ 0.8e2      |
| 10  | 99.52 $\pm$ 4.78  | 1.8e6 $\pm$ 1.2e6 | 4.5e2 $\pm$ 2.9e2 | 4.9e5 $\pm$ 3.4e5 | 2.2e3 $\pm$ 1.5e3 | 2.09e2 $\pm$ 1.2e2      |
| 11  | 99.34 $\pm$ 6.56  | 2.8e6 $\pm$ 1.8e6 | 6e2 $\pm$ 3.9e2   | 7.4e5 $\pm$ 5e5   | 2.9e3 $\pm$ 2e3   | 3.11e2 $\pm$ 2e2        |
| 12  | 99.13 $\pm$ 8.56  | 4.1e6 $\pm$ 2.8e6 | 7.7e2 $\pm$ 5.2e2 | 1.1e6 $\pm$ 0.8e6 | 3.8e3 $\pm$ 2.7e3 | 4.56e2 $\pm$ 3e2        |
| 13  | 99.19 $\pm$ 8.11  | 6.1e6 $\pm$ 4.1e6 | 10e2 $\pm$ 6.7e2  | 1.6e6 $\pm$ 1.1e6 | 5.3e3 $\pm$ 3.7e3 | 6.22e2 $\pm$ 4.2e2      |
| 14  | 99.16 $\pm$ 8.44  | 8.9e6 $\pm$ 6.2e6 | 1.3e3 $\pm$ 0.9e3 | 2.3e6 $\pm$ 1.6e6 | 6.9e3 $\pm$ 5e3   | 8.78e2 $\pm$ 5.9e2      |
| 15  | 99.14 $\pm$ 8.56  | 1.3e7 $\pm$ 0.9e7 | 1.6e3 $\pm$ 1.2e3 | 3.2e6 $\pm$ 2.5e6 | 9.1e3 $\pm$ 7e3   | 1.23e3 $\pm$ 0.9e3      |
| 16  | 99.13 $\pm$ 8.67  | 1.8e7 $\pm$ 1.3e7 | 2e3 $\pm$ 1.5e3   | 4.4e6 $\pm$ 3.3e6 | 1.2e4 $\pm$ 0.9e4 | 1.67e3 $\pm$ 1.2e3      |
| 17  | 99.11 $\pm$ 8.89  | 2.3e7 $\pm$ 1.6e7 | 2.3e3 $\pm$ 1.6e3 | 5.6e6 $\pm$ 3.8e6 | 1.4e4 $\pm$ 0.9e4 | 2.2e3 $\pm$ 1.6e3       |
| 18  | 99.17 $\pm$ 8.33  | 2.9e7 $\pm$ 1.8e7 | 2.6e3 $\pm$ 1.6e3 | 6.7e6 $\pm$ 4.1e6 | 1.5e4 $\pm$ 0.9e4 | 2.78e3 $\pm$ 1.9e3      |
| 19  | 99.11 $\pm$ 8.89  | 3.7e7 $\pm$ 2.1e7 | 3e3 $\pm$ 1.7e3   | 8.7e6 $\pm$ 4.8e6 | 1.9e4 $\pm$ 1.1e4 | 3.28e3 $\pm$ 2.1e3      |
| 20  | 99.13 $\pm$ 8.67  | 4.5e7 $\pm$ 2.3e7 | 3.3e3 $\pm$ 1.7e3 | 1e7 $\pm$ 0.5e7   | 2.2e4 $\pm$ 1.1e4 | 4.05e3 $\pm$ 2.3e3      |
| 21  | 99.09 $\pm$ 9.11  | 5.3e7 $\pm$ 2.5e7 | 3.6e3 $\pm$ 1.7e3 | 1.2e7 $\pm$ 0.6e7 | 2.3e4 $\pm$ 1.1e4 | 4.77e3 $\pm$ 2.5e3      |
| 22  | 99.11 $\pm$ 8.89  | 6.2e7 $\pm$ 2.6e7 | 3.8e3 $\pm$ 1.6e3 | 1.4e7 $\pm$ 0.6e7 | 2.6e4 $\pm$ 1.1e4 | 5.44e3 $\pm$ 2.6e3      |
| 23  | 99.12 $\pm$ 8.78  | 6.8e7 $\pm$ 2.5e7 | 3.8e3 $\pm$ 1.4e3 | 1.4e7 $\pm$ 0.5e7 | 2.6e4 $\pm$ 1e4   | 6.12e3 $\pm$ 2.6e3      |
| 24  | 99.13 $\pm$ 8.67  | 7.4e7 $\pm$ 2.4e7 | 3.9e3 $\pm$ 1.3e3 | 1.6e7 $\pm$ 0.5e7 | 2.6e4 $\pm$ 0.9e4 | 6.47e3 $\pm$ 2.4e3      |
| 25  | 99.09 $\pm$ 9.11  | 8e7 $\pm$ 2.4e7   | 3.9e3 $\pm$ 1.2e3 | 1.7e7 $\pm$ 0.5e7 | 2.7e4 $\pm$ 0.9e4 | 6.79e3 $\pm$ 2.2e3      |
| 26  | 99.09 $\pm$ 9.11  | 8.5e7 $\pm$ 2.4e7 | 3.8e3 $\pm$ 1.1e3 | 1.7e7 $\pm$ 0.5e7 | 2.7e4 $\pm$ 0.8e4 | 7.12e3 $\pm$ 2.2e3      |
| 27  | 99.1 $\pm$ 9      | 8.8e7 $\pm$ 2.2e7 | 3.6e3 $\pm$ 0.9e3 | 1.8e7 $\pm$ 0.5e7 | 2.6e4 $\pm$ 0.7e4 | 7.3e3 $\pm$ 2.1e3       |
| 28  | 99.1 $\pm$ 9      | 9.2e7 $\pm$ 2.2e7 | 3.5e3 $\pm$ 0.8e3 | 1.9e7 $\pm$ 0.5e7 | 2.6e4 $\pm$ 0.7e4 | 7.31e3 $\pm$ 1.8e3      |
| 29  | 99.08 $\pm$ 9.22  | 9.5e7 $\pm$ 2.2e7 | 3.4e3 $\pm$ 0.8e3 | 1.9e7 $\pm$ 0.5e7 | 2.5e4 $\pm$ 0.7e4 | 7.38e3 $\pm$ 1.8e3      |
| 30  | 99.09 $\pm$ 9.11  | 9.8e7 $\pm$ 2.2e7 | 3.3e3 $\pm$ 0.7e3 | 2e7 $\pm$ 0.5e7   | 2.5e4 $\pm$ 0.7e4 | 7.32e3 $\pm$ 1.7e3      |
| 31  | 99.04 $\pm$ 9.56  | 1e8 $\pm$ 0.2e8   | 3.1e3 $\pm$ 0.7e3 | 2e7 $\pm$ 0.5e7   | 2.5e4 $\pm$ 0.6e4 | 7.32e3 $\pm$ 1.6e3      |
| 32  | 99.07 $\pm$ 9.33  | 1e8 $\pm$ 0.2e8   | 3e3 $\pm$ 0.6e3   | 2e7 $\pm$ 0.5e7   | 2.4e4 $\pm$ 0.6e4 | 7.25e3 $\pm$ 1.5e3      |
| 33  | 99.07 $\pm$ 9.33  | 1e8 $\pm$ 0.2e8   | 2.8e3 $\pm$ 0.5e3 | 2e7 $\pm$ 0.5e7   | 2.4e4 $\pm$ 0.5e4 | 7.11e3 $\pm$ 1.4e3      |
| 34  | 99.06 $\pm$ 9.44  | 1e8 $\pm$ 0.2e8   | 2.7e3 $\pm$ 0.5e3 | 2e7 $\pm$ 0.5e7   | 2.3e4 $\pm$ 0.5e4 | 6.98e3 $\pm$ 1.3e3      |
| 35  | 99.03 $\pm$ 9.67  | 1e8 $\pm$ 0.2e8   | 2.6e3 $\pm$ 0.5e3 | 2.1e7 $\pm$ 0.5e7 | 2.2e4 $\pm$ 0.5e4 | 6.75e3 $\pm$ 1.2e3      |
| 36  | 99.03 $\pm$ 9.67  | 1.1e8 $\pm$ 0.2e8 | 2.5e3 $\pm$ 0.4e3 | 2.1e7 $\pm$ 0.5e7 | 2.3e4 $\pm$ 0.5e4 | 6.61e3 $\pm$ 1.2e3      |
| 37  | 99.03 $\pm$ 9.67  | 1.1e8 $\pm$ 0.2e8 | 2.3e3 $\pm$ 0.4e3 | 2e7 $\pm$ 0.4e7   | 2.1e4 $\pm$ 0.4e4 | 6.52e3 $\pm$ 1.1e3      |

The average of the prevalence, the CFU-values per square meter (cfu/sqm) and per gram manure are calculated over all iterations. The CFU values in the intestine as well as the excreted and ingested quantities are obtained by calculating the average over all animals in one iteration at first and then over all iterations.

**Table S12b (log<sub>10</sub> CFU). Calculated numeric values for scenario when day-old chicks are set positive (10<sup>2</sup> CFU bacteria per chick on day 1), measure stocking density 20 kg/m<sup>2</sup>. Setting: 90 chicks, 18 seeder, 72 sentinels, Ross 308, feeding duration 36 days; stocking density 20 kg/m<sup>2</sup>, 1000 g litter/m<sup>2</sup>**

| day | prevalence in % | cfu/sqm           | cfu/g manure      | cfu in intestine  | cfu/g feces       | cfu ingested per animal |
|-----|-----------------|-------------------|-------------------|-------------------|-------------------|-------------------------|
|     | (% mean ± sd)   | (log10 mean ± sd) | (log10 mean ± sd) | (log10 mean ± sd) | (log10 mean ± sd) | (log10 mean ± sd)       |
| 1   | 0 ± 0           | -Inf ± -Inf       | -Inf ± -Inf       | -Inf ± -Inf       | -Inf ± -Inf       | 1.3 ± 0                 |
| 2   | 19.08 ± 1.04    | 4.58 ± 4.35       | 1.51 ± 1.28       | 4.17 ± 3.94       | 2.65 ± 2.42       | -Inf ± 0                |
| 3   | 65.72 ± 23.58   | 4.82 ± 4.47       | 1.7 ± 1.34        | 4.27 ± 3.91       | 2.46 ± 2.1        | 0.86 ± 0.66             |
| 4   | 88.5 ± 11.42    | 5.02 ± 4.67       | 1.82 ± 1.47       | 4.45 ± 4.13       | 2.45 ± 2.13       | 1.15 ± 0.81             |
| 5   | 95.91 ± 7.09    | 5.23 ± 4.93       | 1.95 ± 1.65       | 4.66 ± 4.4        | 2.59 ± 2.34       | 1.34 ± 0.99             |
| 6   | 98.21 ± 6.19    | 5.43 ± 5.14       | 2.1 ± 1.81        | 4.86 ± 4.59       | 2.88 ± 2.61       | 1.54 ± 1.25             |
| 7   | 99.04 ± 5.68    | 5.65 ± 5.43       | 2.25 ± 2.03       | 5.08 ± 4.9        | 2.91 ± 2.72       | 1.75 ± 1.47             |
| 8   | 99.31 ± 6.24    | 5.86 ± 5.65       | 2.39 ± 2.18       | 5.29 ± 5.1        | 3.06 ± 2.87       | 1.95 ± 1.73             |
| 9   | 99.42 ± 5.56    | 6.06 ± 5.83       | 2.52 ± 2.29       | 5.48 ± 5.25       | 3.21 ± 2.97       | 2.14 ± 1.92             |
| 10  | 99.52 ± 4.78    | 6.26 ± 6.07       | 2.66 ± 2.46       | 5.69 ± 5.53       | 3.34 ± 3.18       | 2.32 ± 2.09             |
| 11  | 99.34 ± 6.56    | 6.45 ± 6.26       | 2.78 ± 2.59       | 5.87 ± 5.7        | 3.47 ± 3.3        | 2.49 ± 2.3              |
| 12  | 99.13 ± 8.56    | 6.62 ± 6.45       | 2.88 ± 2.72       | 6.02 ± 5.88       | 3.58 ± 3.44       | 2.66 ± 2.47             |
| 13  | 99.19 ± 8.11    | 6.79 ± 6.62       | 3 ± 2.83          | 6.2 ± 6.04        | 3.72 ± 3.57       | 2.79 ± 2.63             |
| 14  | 99.16 ± 8.44    | 6.95 ± 6.79       | 3.11 ± 2.95       | 6.36 ± 6.22       | 3.84 ± 3.7        | 2.94 ± 2.77             |
| 15  | 99.14 ± 8.56    | 7.11 ± 6.97       | 3.21 ± 3.07       | 6.51 ± 6.4        | 3.96 ± 3.85       | 3.09 ± 2.93             |
| 16  | 99.13 ± 8.67    | 7.25 ± 7.12       | 3.3 ± 3.17        | 6.64 ± 6.52       | 4.08 ± 3.96       | 3.22 ± 3.09             |
| 17  | 99.11 ± 8.89    | 7.36 ± 7.21       | 3.37 ± 3.21       | 6.75 ± 6.58       | 4.14 ± 3.98       | 3.34 ± 3.21             |
| 18  | 99.17 ± 8.33    | 7.46 ± 7.26       | 3.42 ± 3.21       | 6.82 ± 6.62       | 4.18 ± 3.98       | 3.44 ± 3.29             |
| 19  | 99.11 ± 8.89    | 7.57 ± 7.32       | 3.48 ± 3.23       | 6.94 ± 6.68       | 4.28 ± 4.02       | 3.52 ± 3.31             |
| 20  | 99.13 ± 8.67    | 7.65 ± 7.37       | 3.52 ± 3.24       | 7.01 ± 6.73       | 4.34 ± 4.05       | 3.61 ± 3.36             |
| 21  | 99.09 ± 9.11    | 7.72 ± 7.4        | 3.56 ± 3.23       | 7.07 ± 6.75       | 4.37 ± 4.04       | 3.68 ± 3.39             |
| 22  | 99.11 ± 8.89    | 7.79 ± 7.41       | 3.58 ± 3.21       | 7.14 ± 6.75       | 4.41 ± 4.03       | 3.74 ± 3.41             |
| 23  | 99.12 ± 8.78    | 7.83 ± 7.4        | 3.59 ± 3.15       | 7.15 ± 6.73       | 4.41 ± 3.98       | 3.79 ± 3.41             |
| 24  | 99.13 ± 8.67    | 7.87 ± 7.38       | 3.59 ± 3.1        | 7.2 ± 6.72        | 4.41 ± 3.94       | 3.81 ± 3.38             |
| 25  | 99.09 ± 9.11    | 7.9 ± 7.39        | 3.59 ± 3.07       | 7.23 ± 6.73       | 4.43 ± 3.93       | 3.83 ± 3.35             |
| 26  | 99.09 ± 9.11    | 7.93 ± 7.38       | 3.58 ± 3.03       | 7.24 ± 6.73       | 4.44 ± 3.92       | 3.85 ± 3.33             |
| 27  | 99.1 ± 9        | 7.94 ± 7.35       | 3.56 ± 2.96       | 7.25 ± 6.69       | 4.42 ± 3.86       | 3.86 ± 3.31             |
| 28  | 99.1 ± 9        | 7.96 ± 7.34       | 3.55 ± 2.92       | 7.27 ± 6.69       | 4.42 ± 3.83       | 3.86 ± 3.27             |
| 29  | 99.08 ± 9.22    | 7.98 ± 7.34       | 3.53 ± 2.89       | 7.28 ± 6.69       | 4.4 ± 3.81        | 3.87 ± 3.24             |
| 30  | 99.09 ± 9.11    | 7.99 ± 7.34       | 3.51 ± 2.86       | 7.29 ± 6.72       | 4.41 ± 3.84       | 3.86 ± 3.23             |
| 31  | 99.04 ± 9.56    | 8 ± 7.32          | 3.5 ± 2.81        | 7.3 ± 6.67        | 4.39 ± 3.76       | 3.86 ± 3.21             |
| 32  | 99.07 ± 9.33    | 8.01 ± 7.31       | 3.48 ± 2.77       | 7.3 ± 6.67        | 4.38 ± 3.74       | 3.86 ± 3.18             |
| 33  | 99.07 ± 9.33    | 8.01 ± 7.29       | 3.45 ± 2.73       | 7.31 ± 6.67       | 4.37 ± 3.73       | 3.85 ± 3.15             |
| 34  | 99.06 ± 9.44    | 8.01 ± 7.28       | 3.43 ± 2.69       | 7.3 ± 6.69        | 4.36 ± 3.74       | 3.84 ± 3.12             |
| 35  | 99.03 ± 9.67    | 8.02 ± 7.28       | 3.41 ± 2.66       | 7.31 ± 6.66       | 4.35 ± 3.7        | 3.83 ± 3.09             |
| 36  | 99.03 ± 9.67    | 8.03 ± 7.26       | 3.39 ± 2.63       | 7.33 ± 6.66       | 4.35 ± 3.69       | 3.82 ± 3.08             |
| 37  | 99.03 ± 9.67    | 8.03 ± 7.24       | 3.36 ± 2.58       | 7.31 ± 6.62       | 4.33 ± 3.64       | 3.81 ± 3.05             |

The average of the prevalence, the CFU-values per square meter (cfu/sqm) and per gram manure are calculated over all iterations. The CFU values in the intestine as well as the excreted and ingested quantities are obtained by calculating the average over all animals in one iteration at first and then over all iterations. The decadic logarithm of zero or negative values is negative infinite (-Inf).

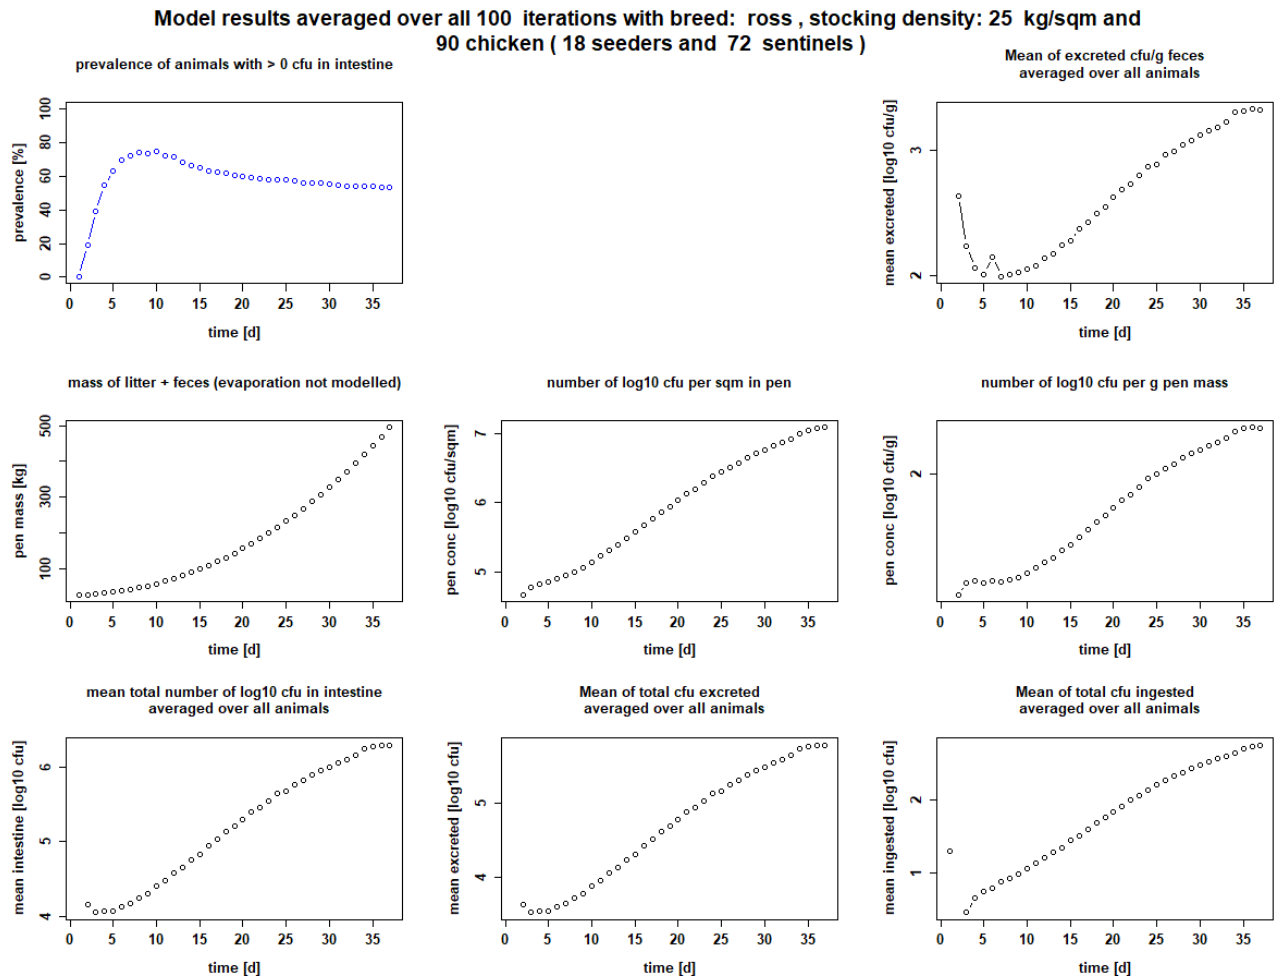

**Figure S13. Calculated infection dynamic when day-old chicks are set positive ( $10^2$  CFU bacteria per chick on day 1), combined measures litter  $3000 \text{ g/m}^2$  and stocking density  $25 \text{ kg/m}^2$ . Dotplots with results for 90 chicks, 18 seeder, 72 sentinels, Ross 308, feeding duration 36 days, stocking density  $25 \text{ kg/m}^2$ ,  $3000 \text{ g litter/m}^2$**

**Table S13a (CFU). Calculated numeric values for scenario when day-old chicks are set positive ( $10^2$  CFU bacteria per chick on day 1), combined measures litter 3000 g/m<sup>2</sup> and stocking density 25 kg/m<sup>2</sup>. Setting: 90 chicks, 18 seeder, 72 sentinels, Ross 308, feeding duration 36 days, stocking density 20 kg/m<sup>2</sup>, 3000 g litter/m<sup>2</sup>**

| day | prevalence in %   | cfu/sqm            | cfu/g manure       | cfu in intestine   | cfu/g feces        | cfu ingested per animal |
|-----|-------------------|--------------------|--------------------|--------------------|--------------------|-------------------------|
|     | (mean $\pm$ sd)   | (mean $\pm$ sd)    | (mean $\pm$ sd)    | (mean $\pm$ sd)    | (mean $\pm$ sd)    | (mean $\pm$ sd)         |
| 1   | 0 $\pm$ 0         | 0e0 $\pm$ 0        | 0e0 $\pm$ 0        | 0e0 $\pm$ 0        | 0e0 $\pm$ 0        | 2e1 $\pm$ 0e1           |
| 2   | 19.22 $\pm$ 0.84  | 4.6e4 $\pm$ 2.9e4  | 1.4e1 $\pm$ 0.9e1  | 1.4e4 $\pm$ 0.9e4  | 4.3e2 $\pm$ 2.7e2  | 0e0 $\pm$ 0             |
| 3   | 39.33 $\pm$ 22.23 | 5.9e4 $\pm$ 2.9e4  | 1.7e1 $\pm$ 0.9e1  | 1.1e4 $\pm$ 0.7e4  | 1.7e2 $\pm$ 1e2    | 2.9 $\pm$ 2.1           |
| 4   | 54.74 $\pm$ 24.1  | 6.7e4 $\pm$ 3.5e4  | 1.8e1 $\pm$ 0.9e1  | 1.2e4 $\pm$ 0.7e4  | 1.2e2 $\pm$ 0.7e2  | 4.58 $\pm$ 2.6          |
| 5   | 63.43 $\pm$ 23.91 | 7.2e4 $\pm$ 3.6e4  | 1.7e1 $\pm$ 0.9e1  | 1.2e4 $\pm$ 0.7e4  | 1e2 $\pm$ 0.6e2    | 5.54 $\pm$ 3.1          |
| 6   | 69.71 $\pm$ 22.93 | 7.9e4 $\pm$ 4.8e4  | 1.8e1 $\pm$ 1.1e1  | 1.4e4 $\pm$ 1e4    | 1.4e2 $\pm$ 1e2    | 6.29 $\pm$ 3.5          |
| 7   | 72.12 $\pm$ 24.74 | 8.7e4 $\pm$ 6.1e4  | 1.8e1 $\pm$ 1.2e1  | 1.5e4 $\pm$ 1.2e4  | 9.8e1 $\pm$ 7.8e1  | 7.58 $\pm$ 4.9          |
| 8   | 74.42 $\pm$ 25.49 | 10e4 $\pm$ 7.7e4   | 1.8e1 $\pm$ 1.4e1  | 1.7e4 $\pm$ 1.5e4  | 1e2 $\pm$ 0.9e2    | 8.49 $\pm$ 6.2          |
| 9   | 73.97 $\pm$ 28.29 | 1.1e5 $\pm$ 0.9e5  | 1.9e1 $\pm$ 1.6e1  | 2e4 $\pm$ 1.8e4    | 1.1e2 $\pm$ 0.9e2  | 9.71 $\pm$ 7.9          |
| 10  | 74.8 $\pm$ 28.43  | 1.4e5 $\pm$ 1.4e5  | 2e1 $\pm$ 2e1      | 2.5e4 $\pm$ 2.8e4  | 1.1e2 $\pm$ 1.3e2  | 1.14e1 $\pm$ 1e1        |
| 11  | 72.62 $\pm$ 31.85 | 1.7e5 $\pm$ 1.8e5  | 2.2e1 $\pm$ 2.4e1  | 3e4 $\pm$ 3.5e4    | 1.2e2 $\pm$ 1.4e2  | 1.35e1 $\pm$ 1.4e1      |
| 12  | 71.64 $\pm$ 34    | 2.1e5 $\pm$ 2.4e5  | 2.4e1 $\pm$ 2.8e1  | 3.8e4 $\pm$ 4.8e4  | 1.4e2 $\pm$ 1.7e2  | 1.61e1 $\pm$ 1.8e1      |
| 13  | 68.66 $\pm$ 37.24 | 2.5e5 $\pm$ 3.1e5  | 2.6e1 $\pm$ 3.3e1  | 4.5e4 $\pm$ 6e4    | 1.5e2 $\pm$ 2e2    | 1.92e1 $\pm$ 2.3e1      |
| 14  | 66.72 $\pm$ 39.1  | 3.1e5 $\pm$ 4e5    | 2.9e1 $\pm$ 3.8e1  | 5.8e4 $\pm$ 7.7e4  | 1.7e2 $\pm$ 2.3e2  | 2.25e1 $\pm$ 2.9e1      |
| 15  | 65.31 $\pm$ 40.12 | 3.7e5 $\pm$ 5.1e5  | 3.2e1 $\pm$ 4.4e1  | 6.8e4 $\pm$ 9.9e4  | 1.9e2 $\pm$ 2.8e2  | 2.78e1 $\pm$ 3.7e1      |
| 16  | 63.28 $\pm$ 41.74 | 4.7e5 $\pm$ 6.7e5  | 3.6e1 $\pm$ 5.2e1  | 8.7e4 $\pm$ 13.2e4 | 2.4e2 $\pm$ 3.6e2  | 3.27e1 $\pm$ 4.5e1      |
| 17  | 62.59 $\pm$ 42.09 | 5.8e5 $\pm$ 8.8e5  | 4.1e1 $\pm$ 6.2e1  | 1.1e5 $\pm$ 1.7e5  | 2.6e2 $\pm$ 4.3e2  | 3.96e1 $\pm$ 5.8e1      |
| 18  | 61.77 $\pm$ 42.99 | 7.2e5 $\pm$ 11.5e5 | 4.6e1 $\pm$ 7.4e1  | 1.3e5 $\pm$ 2.2e5  | 3.1e2 $\pm$ 5.1e2  | 4.79e1 $\pm$ 7.4e1      |
| 19  | 60.87 $\pm$ 43.53 | 8.8e5 $\pm$ 13.8e5 | 5.1e1 $\pm$ 8.1e1  | 1.6e5 $\pm$ 2.5e5  | 3.5e2 $\pm$ 5.6e2  | 5.79e1 $\pm$ 9.3e1      |
| 20  | 60.29 $\pm$ 43.46 | 1.1e6 $\pm$ 1.8e6  | 5.8e1 $\pm$ 9.5e1  | 2e5 $\pm$ 3.4e5    | 4.2e2 $\pm$ 7.1e2  | 6.86e1 $\pm$ 10.9e1     |
| 21  | 59.62 $\pm$ 43.96 | 1.3e6 $\pm$ 2.2e6  | 6.6e1 $\pm$ 10.7e1 | 2.5e5 $\pm$ 4.1e5  | 4.9e2 $\pm$ 8e2    | 8.23e1 $\pm$ 13.5e1     |
| 22  | 58.8 $\pm$ 44.49  | 1.6e6 $\pm$ 2.6e6  | 7.2e1 $\pm$ 11.7e1 | 2.8e5 $\pm$ 4.7e5  | 5.4e2 $\pm$ 8.8e2  | 9.92e1 $\pm$ 16.2e1     |
| 23  | 58.36 $\pm$ 44.75 | 1.9e6 $\pm$ 3.1e6  | 8.1e1 $\pm$ 13.3e1 | 3.5e5 $\pm$ 5.9e5  | 6.3e2 $\pm$ 10.5e2 | 1.14e2 $\pm$ 1.9e2      |
| 24  | 58.03 $\pm$ 44.91 | 2.4e6 $\pm$ 4e6    | 9.3e1 $\pm$ 15.6e1 | 4.4e5 $\pm$ 7.6e5  | 7.3e2 $\pm$ 12.6e2 | 1.36e2 $\pm$ 2.2e2      |
| 25  | 57.89 $\pm$ 44.78 | 2.7e6 $\pm$ 4.6e6  | 9.9e1 $\pm$ 16.7e1 | 4.8e5 $\pm$ 8.2e5  | 7.7e2 $\pm$ 13.2e2 | 1.62e2 $\pm$ 2.7e2      |
| 26  | 57.19 $\pm$ 45.03 | 3.2e6 $\pm$ 5.4e6  | 1.1e2 $\pm$ 1.8e2  | 5.8e5 $\pm$ 9.8e5  | 9.1e2 $\pm$ 15.4e2 | 1.81e2 $\pm$ 3.1e2      |
| 27  | 55.91 $\pm$ 45.84 | 3.7e6 $\pm$ 6.4e6  | 1.2e2 $\pm$ 2e2    | 6.6e5 $\pm$ 11.5e5 | 9.7e2 $\pm$ 16.9e2 | 2.08e2 $\pm$ 3.5e2      |
| 28  | 56.22 $\pm$ 45.63 | 4.4e6 $\pm$ 7.4e6  | 1.3e2 $\pm$ 2.2e2  | 7.8e5 $\pm$ 13.4e5 | 1.1e3 $\pm$ 1.9e3  | 2.34e2 $\pm$ 4e2        |
| 29  | 56.14 $\pm$ 45.7  | 5.1e6 $\pm$ 8.7e6  | 1.4e2 $\pm$ 2.4e2  | 9e5 $\pm$ 15.8e5   | 1.2e3 $\pm$ 2.1e3  | 2.67e2 $\pm$ 4.5e2      |
| 30  | 55.23 $\pm$ 46.4  | 5.7e6 $\pm$ 9.8e6  | 1.5e2 $\pm$ 2.5e2  | 10e5 $\pm$ 17e5    | 1.3e3 $\pm$ 2.2e3  | 2.99e2 $\pm$ 5.1e2      |
| 31  | 54.87 $\pm$ 46.34 | 6.6e6 $\pm$ 11.1e6 | 1.6e2 $\pm$ 2.7e2  | 1.1e6 $\pm$ 1.9e6  | 1.4e3 $\pm$ 2.4e3  | 3.29e2 $\pm$ 5.6e2      |
| 32  | 54.41 $\pm$ 46.77 | 7.4e6 $\pm$ 12.2e6 | 1.7e2 $\pm$ 2.7e2  | 1.3e6 $\pm$ 2.1e6  | 1.5e3 $\pm$ 2.5e3  | 3.63e2 $\pm$ 6.1e2      |
| 33  | 54.47 $\pm$ 46.71 | 8.3e6 $\pm$ 13.9e6 | 1.8e2 $\pm$ 2.9e2  | 1.4e6 $\pm$ 2.5e6  | 1.7e3 $\pm$ 2.9e3  | 3.95e2 $\pm$ 6.5e2      |
| 34  | 54.27 $\pm$ 46.91 | 9.8e6 $\pm$ 16.7e6 | 2e2 $\pm$ 3.3e2    | 1.8e6 $\pm$ 3.1e6  | 2e3 $\pm$ 3.5e3    | 4.32e2 $\pm$ 7.2e2      |
| 35  | 53.88 $\pm$ 47.32 | 1.1e7 $\pm$ 1.9e7  | 2.1e2 $\pm$ 3.6e2  | 1.9e6 $\pm$ 3.4e6  | 2e3 $\pm$ 3.7e3    | 4.94e2 $\pm$ 8.4e2      |
| 36  | 53.62 $\pm$ 47.58 | 1.2e7 $\pm$ 2e7    | 2.1e2 $\pm$ 3.6e2  | 2e6 $\pm$ 3.3e6    | 2.1e3 $\pm$ 3.5e3  | 5.35e2 $\pm$ 9.4e2      |
| 37  | 53.32 $\pm$ 47.88 | 1.2e7 $\pm$ 2e7    | 2.1e2 $\pm$ 3.4e2  | 2e6 $\pm$ 3.2e6    | 2.1e3 $\pm$ 3.4e3  | 5.57e2 $\pm$ 9.5e2      |

The average of the prevalence, the CFU-values per square meter (cfu/sqm) and per gram manure are calculated over all iterations. The CFU values in the intestine as well as the excreted and ingested quantities are obtained by calculating the average over all animals in one iteration at first and then over all iterations.

**Table S13b (log<sub>10</sub> CFU). Calculated numeric values for scenario when day-old chicks are set positive (10<sup>2</sup> CFU bacteria per chick on day 1), combined measures litter 3000 g/m<sup>2</sup> and stocking density 25 kg/m<sup>2</sup>. Setting: 90 chicks, 18 seeder, 72 sentinels, Ross 308, feeding duration 36 days, stocking density 20 kg/m<sup>2</sup>, 3000 g litter/m<sup>2</sup>**

| day | prevalence in % | cfu/sqm           | cfu/g manure      | cfu in intestine  | cfu/g feces       | cfu ingested per animal |
|-----|-----------------|-------------------|-------------------|-------------------|-------------------|-------------------------|
|     | (% mean ± sd)   | (log10 mean ± sd) | (log10 mean ± sd) | (log10 mean ± sd) | (log10 mean ± sd) | (log10 mean ± sd)       |
| 1   | 0 ± 0           | -Inf ± -Inf       | -Inf ± -Inf       | -Inf ± -Inf       | -Inf ± -Inf       | 1.3 ± 0                 |
| 2   | 19.22 ± 0.84    | 4.66 ± 4.46       | 1.16 ± 0.95       | 4.16 ± 3.95       | 2.63 ± 2.43       | -Inf ± 0                |
| 3   | 39.33 ± 22.23   | 4.77 ± 4.47       | 1.24 ± 0.93       | 4.05 ± 3.82       | 2.24 ± 2.01       | 0.46 ± 0.33             |
| 4   | 54.74 ± 24.1    | 4.83 ± 4.54       | 1.25 ± 0.97       | 4.07 ± 3.86       | 2.06 ± 1.86       | 0.66 ± 0.41             |
| 5   | 63.43 ± 23.91   | 4.86 ± 4.56       | 1.24 ± 0.95       | 4.08 ± 3.82       | 2.01 ± 1.75       | 0.74 ± 0.5              |
| 6   | 69.71 ± 22.93   | 4.9 ± 4.68        | 1.25 ± 1.04       | 4.13 ± 3.99       | 2.15 ± 2.01       | 0.8 ± 0.55              |
| 7   | 72.12 ± 24.74   | 4.94 ± 4.78       | 1.25 ± 1.09       | 4.17 ± 4.07       | 1.99 ± 1.89       | 0.88 ± 0.69             |
| 8   | 74.42 ± 25.49   | 5 ± 4.89          | 1.26 ± 1.15       | 4.24 ± 4.18       | 2.01 ± 1.95       | 0.93 ± 0.79             |
| 9   | 73.97 ± 28.29   | 5.06 ± 4.98       | 1.27 ± 1.19       | 4.3 ± 4.25        | 2.02 ± 1.98       | 0.99 ± 0.9              |
| 10  | 74.8 ± 28.43    | 5.14 ± 5.14       | 1.31 ± 1.31       | 4.4 ± 4.45        | 2.06 ± 2.11       | 1.05 ± 0.99             |
| 11  | 72.62 ± 31.85   | 5.22 ± 5.25       | 1.34 ± 1.37       | 4.48 ± 4.55       | 2.08 ± 2.14       | 1.13 ± 1.14             |
| 12  | 71.64 ± 34      | 5.31 ± 5.38       | 1.39 ± 1.45       | 4.58 ± 4.68       | 2.14 ± 2.23       | 1.21 ± 1.25             |
| 13  | 68.66 ± 37.24   | 5.39 ± 5.49       | 1.42 ± 1.52       | 4.65 ± 4.78       | 2.17 ± 2.3        | 1.28 ± 1.36             |
| 14  | 66.72 ± 39.1    | 5.49 ± 5.6        | 1.47 ± 1.58       | 4.76 ± 4.89       | 2.24 ± 2.37       | 1.35 ± 1.46             |
| 15  | 65.31 ± 40.12   | 5.57 ± 5.71       | 1.51 ± 1.64       | 4.83 ± 5          | 2.28 ± 2.44       | 1.44 ± 1.57             |
| 16  | 63.28 ± 41.74   | 5.67 ± 5.83       | 1.56 ± 1.72       | 4.94 ± 5.12       | 2.37 ± 2.55       | 1.51 ± 1.66             |
| 17  | 62.59 ± 42.09   | 5.76 ± 5.94       | 1.61 ± 1.79       | 5.03 ± 5.24       | 2.42 ± 2.63       | 1.6 ± 1.76              |
| 18  | 61.77 ± 42.99   | 5.86 ± 6.06       | 1.67 ± 1.87       | 5.13 ± 5.35       | 2.49 ± 2.71       | 1.68 ± 1.87             |
| 19  | 60.87 ± 43.53   | 5.94 ± 6.14       | 1.71 ± 1.91       | 5.2 ± 5.41        | 2.54 ± 2.75       | 1.76 ± 1.97             |
| 20  | 60.29 ± 43.46   | 6.03 ± 6.24       | 1.76 ± 1.98       | 5.3 ± 5.53        | 2.62 ± 2.85       | 1.84 ± 2.04             |
| 21  | 59.62 ± 43.96   | 6.12 ± 6.34       | 1.82 ± 2.03       | 5.39 ± 5.61       | 2.69 ± 2.9        | 1.92 ± 2.13             |
| 22  | 58.8 ± 44.49    | 6.2 ± 6.41        | 1.86 ± 2.07       | 5.45 ± 5.67       | 2.73 ± 2.95       | 2 ± 2.21                |
| 23  | 58.36 ± 44.75   | 6.28 ± 6.5        | 1.91 ± 2.12       | 5.55 ± 5.77       | 2.8 ± 3.02        | 2.06 ± 2.27             |
| 24  | 58.03 ± 44.91   | 6.38 ± 6.6        | 1.97 ± 2.19       | 5.64 ± 5.88       | 2.86 ± 3.1        | 2.13 ± 2.35             |
| 25  | 57.89 ± 44.78   | 6.44 ± 6.66       | 2 ± 2.22          | 5.68 ± 5.92       | 2.89 ± 3.12       | 2.21 ± 2.43             |
| 26  | 57.19 ± 45.03   | 6.51 ± 6.74       | 2.04 ± 2.26       | 5.76 ± 5.99       | 2.96 ± 3.19       | 2.26 ± 2.49             |
| 27  | 55.91 ± 45.84   | 6.57 ± 6.8        | 2.07 ± 2.3        | 5.82 ± 6.06       | 2.99 ± 3.23       | 2.32 ± 2.55             |
| 28  | 56.22 ± 45.63   | 6.64 ± 6.87       | 2.11 ± 2.34       | 5.89 ± 6.13       | 3.04 ± 3.27       | 2.37 ± 2.6              |
| 29  | 56.14 ± 45.7    | 6.71 ± 6.94       | 2.14 ± 2.38       | 5.95 ± 6.2        | 3.07 ± 3.32       | 2.43 ± 2.66             |
| 30  | 55.23 ± 46.4    | 6.76 ± 6.99       | 2.17 ± 2.4        | 6 ± 6.23          | 3.11 ± 3.34       | 2.48 ± 2.71             |
| 31  | 54.87 ± 46.34   | 6.82 ± 7.04       | 2.2 ± 2.43        | 6.06 ± 6.29       | 3.15 ± 3.38       | 2.52 ± 2.75             |
| 32  | 54.41 ± 46.77   | 6.87 ± 7.09       | 2.22 ± 2.44       | 6.1 ± 6.32        | 3.18 ± 3.4        | 2.56 ± 2.79             |
| 33  | 54.47 ± 46.71   | 6.92 ± 7.14       | 2.25 ± 2.47       | 6.16 ± 6.4        | 3.22 ± 3.46       | 2.6 ± 2.82              |
| 34  | 54.27 ± 46.91   | 6.99 ± 7.22       | 2.29 ± 2.52       | 6.25 ± 6.49       | 3.3 ± 3.54        | 2.64 ± 2.86             |
| 35  | 53.88 ± 47.32   | 7.04 ± 7.28       | 2.32 ± 2.56       | 6.27 ± 6.53       | 3.31 ± 3.57       | 2.69 ± 2.93             |
| 36  | 53.62 ± 47.58   | 7.07 ± 7.31       | 2.32 ± 2.56       | 6.29 ± 6.52       | 3.32 ± 3.55       | 2.73 ± 2.97             |
| 37  | 53.32 ± 47.88   | 7.09 ± 7.31       | 2.32 ± 2.54       | 6.3 ± 6.51        | 3.31 ± 3.53       | 2.75 ± 2.98             |

The average of the prevalence, the CFU-values per square meter (cfu/sqm) and per gram manure are calculated over all iterations. The CFU values in the intestine as well as the excreted and ingested quantities are obtained by calculating the average over all animals in one iteration at first and then over all iterations. The decadic logarithm of zero or negative values is negative infinite (-Inf).

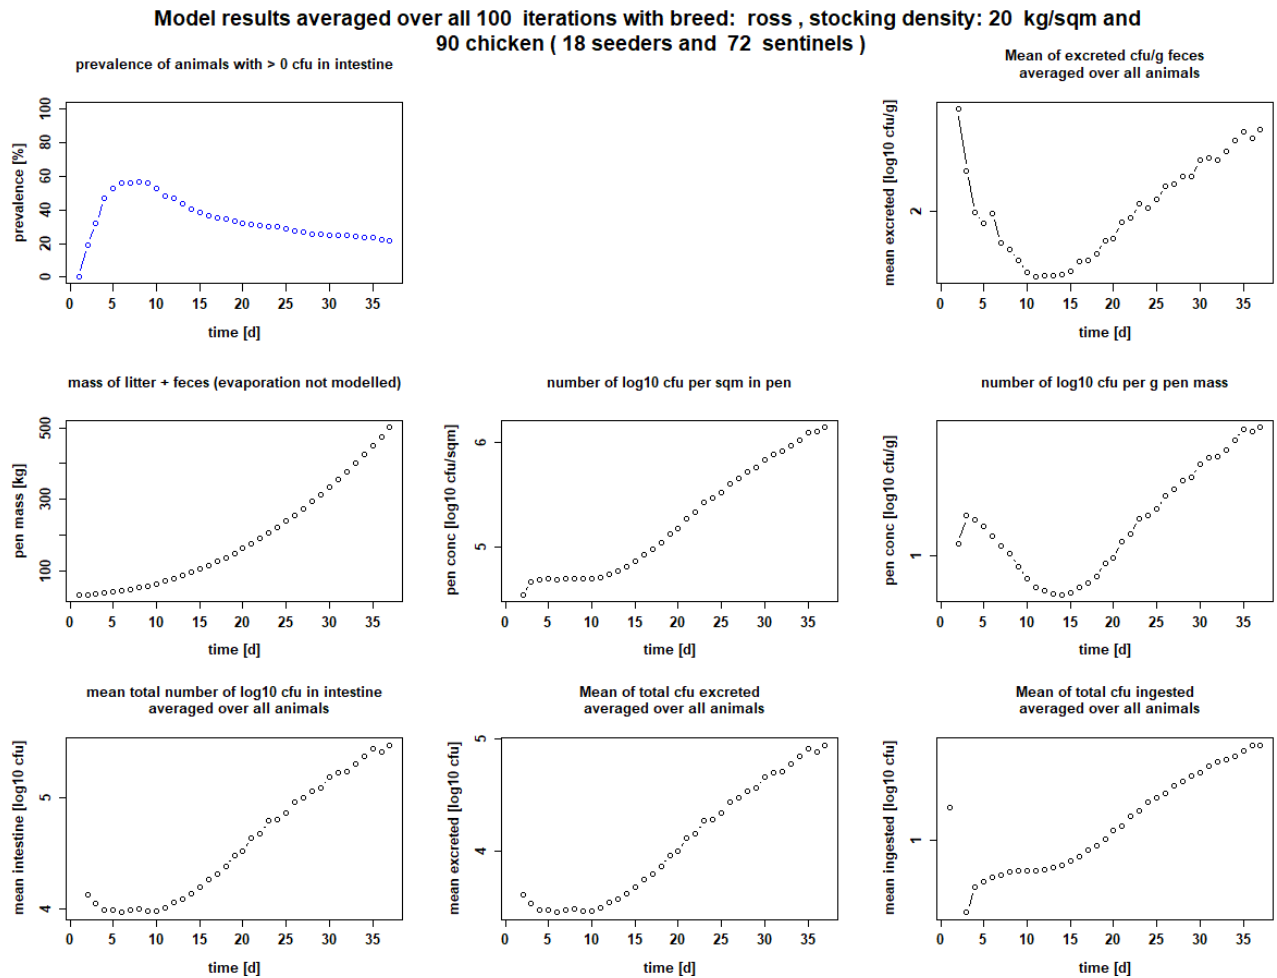

**Figure S14. Calculated infection dynamic when day-old chicks are set positive ( $10^2$  CFU bacteria per chick on day 1), combined measures litter  $3000 \text{ g/m}^2$  and stocking density  $20 \text{ kg/m}^2$ . Dotplots with results for 90 chicks, 18 seeder, 72 sentinels, Ross 308, feeding duration 36 days, stocking density  $20 \text{ kg/m}^2$ ,  $3000 \text{ g litter/m}^2$**



**Table S14a (CFU). Calculated numeric values for scenario when day-old chicks are set positive ( $10^2$  CFU bacteria per chick on day 1), combined measures litter 3000 g/m<sup>2</sup> and stocking density 20 kg/m<sup>2</sup>. Setting: 90 chicks, 18 seeder, 72 sentinels, Ross 308, feeding duration 36 days, stocking density 20 kg/m<sup>2</sup>, 3000 g litter/m<sup>2</sup>**

| day | prevalence in %   | cfu/sqm            | cfu/g manure      | cfu in intestine   | cfu/g feces        | cfu ingested per animal |
|-----|-------------------|--------------------|-------------------|--------------------|--------------------|-------------------------|
|     | (mean $\pm$ sd)   | (mean $\pm$ sd)    | (mean $\pm$ sd)   | (mean $\pm$ sd)    | (mean $\pm$ sd)    | (mean $\pm$ sd)         |
| 1   | 0 $\pm$ 0         | 0e0 $\pm$ 0        | 0e0 $\pm$ 0       | 0e0 $\pm$ 0        | 0e0 $\pm$ 0        | 2e1 $\pm$ 0e1           |
| 2   | 19.23 $\pm$ 0.89  | 3.5e4 $\pm$ 2.1e4  | 1.1e1 $\pm$ 0.6e1 | 1.4e4 $\pm$ 0.8e4  | 4.1e2 $\pm$ 2.4e2  | 0e0 $\pm$ 0             |
| 3   | 31.84 $\pm$ 17.64 | 4.7e4 $\pm$ 2.2e4  | 1.4e1 $\pm$ 0.7e1 | 1.1e4 $\pm$ 0.7e4  | 1.7e2 $\pm$ 1e2    | 2.13 $\pm$ 1.5          |
| 4   | 46.89 $\pm$ 22.47 | 4.9e4 $\pm$ 2.3e4  | 1.4e1 $\pm$ 0.7e1 | 9.9e3 $\pm$ 5.9e3  | 9.9e1 $\pm$ 5.8e1  | 3.62 $\pm$ 2            |
| 5   | 52.93 $\pm$ 24.16 | 5e4 $\pm$ 2.4e4    | 1.3e1 $\pm$ 0.6e1 | 9.8e3 $\pm$ 5.6e3  | 8.4e1 $\pm$ 4.8e1  | 4.07 $\pm$ 2.2          |
| 6   | 56.2 $\pm$ 24.71  | 4.9e4 $\pm$ 2.8e4  | 1.2e1 $\pm$ 0.7e1 | 9.3e3 $\pm$ 6.5e3  | 9.7e1 $\pm$ 6.8e1  | 4.49 $\pm$ 2.4          |
| 7   | 56.26 $\pm$ 27.06 | 4.9e4 $\pm$ 3.2e4  | 1.1e1 $\pm$ 0.7e1 | 9.7e3 $\pm$ 7.5e3  | 6.4e1 $\pm$ 5e1    | 4.75 $\pm$ 3            |
| 8   | 56.91 $\pm$ 28.45 | 5e4 $\pm$ 3.7e4    | 1e1 $\pm$ 0.7e1   | 10e3 $\pm$ 8.4e3   | 5.9e1 $\pm$ 5e1    | 5.01 $\pm$ 3.6          |
| 9   | 55.89 $\pm$ 31.21 | 5e4 $\pm$ 4.2e4    | 9.1 $\pm$ 7.6     | 9.5e3 $\pm$ 9.4e3  | 5e1 $\pm$ 5e1      | 5.15 $\pm$ 4.2          |
| 10  | 52.91 $\pm$ 32.89 | 5e4 $\pm$ 4.6e4    | 8.2 $\pm$ 7.6     | 9.6e3 $\pm$ 10.3e3 | 4.3e1 $\pm$ 4.6e1  | 5.22 $\pm$ 4.8          |
| 11  | 48.54 $\pm$ 34.94 | 5.1e4 $\pm$ 5.5e4  | 7.7 $\pm$ 8.3     | 1e4 $\pm$ 1.3e4    | 4e1 $\pm$ 5.1e1    | 5.13 $\pm$ 5.3          |
| 12  | 47.06 $\pm$ 35.37 | 5.5e4 $\pm$ 7.2e4  | 7.4 $\pm$ 9.8     | 1.1e4 $\pm$ 1.8e4  | 4.1e1 $\pm$ 6.3e1  | 5.26 $\pm$ 6.3          |
| 13  | 43.67 $\pm$ 36.45 | 5.9e4 $\pm$ 8.8e4  | 7.2 $\pm$ 10.8    | 1.2e4 $\pm$ 2.1e4  | 4.1e1 $\pm$ 6.9e1  | 5.57 $\pm$ 7.9          |
| 14  | 40.46 $\pm$ 36.85 | 6.5e4 $\pm$ 10.6e4 | 7.2 $\pm$ 11.7    | 1.4e4 $\pm$ 2.4e4  | 4.2e1 $\pm$ 7.4e1  | 5.86 $\pm$ 9.5          |
| 15  | 38.37 $\pm$ 37.01 | 7.3e4 $\pm$ 13.1e4 | 7.3 $\pm$ 13.2    | 1.6e4 $\pm$ 3.1e4  | 4.4e1 $\pm$ 8.6e1  | 6.45 $\pm$ 11.4         |
| 16  | 36.92 $\pm$ 36.96 | 8.4e4 $\pm$ 16.2e4 | 7.7 $\pm$ 14.9    | 1.8e4 $\pm$ 3.8e4  | 5e1 $\pm$ 10.3e1   | 7.07 $\pm$ 13.7         |
| 17  | 35.41 $\pm$ 37.11 | 9.5e4 $\pm$ 19.8e4 | 7.9 $\pm$ 16.6    | 2.1e4 $\pm$ 4.6e4  | 5.1e1 $\pm$ 11.4e1 | 7.96 $\pm$ 16.5         |
| 18  | 34.57 $\pm$ 36.97 | 1.1e5 $\pm$ 2.4e5  | 8.4 $\pm$ 18.7    | 2.4e4 $\pm$ 5.7e4  | 5.5e1 $\pm$ 13.1e1 | 8.89 $\pm$ 19.8         |
| 19  | 33.54 $\pm$ 36.85 | 1.3e5 $\pm$ 3.1e5  | 9.4 $\pm$ 21.5    | 3e4 $\pm$ 7.2e4    | 6.7e1 $\pm$ 15.7e1 | 1.01e1 $\pm$ 2.4e1      |
| 20  | 32.36 $\pm$ 37.15 | 1.5e5 $\pm$ 3.7e5  | 9.8 $\pm$ 23.8    | 3.3e4 $\pm$ 8.5e4  | 6.9e1 $\pm$ 17.8e1 | 1.21e1 $\pm$ 2.9e1      |
| 21  | 31.47 $\pm$ 37.06 | 1.9e5 $\pm$ 4.8e5  | 1.1e1 $\pm$ 2.8e1 | 4.4e4 $\pm$ 11.4e4 | 8.6e1 $\pm$ 22.5e1 | 1.34e1 $\pm$ 3.4e1      |
| 22  | 30.84 $\pm$ 37.01 | 2.2e5 $\pm$ 5.7e5  | 1.2e1 $\pm$ 3.1e1 | 4.8e4 $\pm$ 12.9e4 | 9.1e1 $\pm$ 24.4e1 | 1.65e1 $\pm$ 4.3e1      |
| 23  | 30.38 $\pm$ 37.23 | 2.7e5 $\pm$ 7.2e5  | 1.4e1 $\pm$ 3.7e1 | 6.2e4 $\pm$ 17.1e4 | 1.1e2 $\pm$ 3.1e2  | 1.87e1 $\pm$ 5e1        |
| 24  | 29.82 $\pm$ 36.69 | 3e5 $\pm$ 8e5      | 1.4e1 $\pm$ 3.8e1 | 6.3e4 $\pm$ 17.2e4 | 1e2 $\pm$ 2.8e2    | 2.25e1 $\pm$ 6.2e1      |
| 25  | 29.07 $\pm$ 36.02 | 3.4e5 $\pm$ 9e5    | 1.5e1 $\pm$ 4e1   | 7.4e4 $\pm$ 19.7e4 | 1.2e2 $\pm$ 3.2e2  | 2.42e1 $\pm$ 6.6e1      |
| 26  | 27.31 $\pm$ 35.82 | 4e5 $\pm$ 10.8e5   | 1.6e1 $\pm$ 4.5e1 | 9e4 $\pm$ 24.9e4   | 1.4e2 $\pm$ 3.9e2  | 2.69e1 $\pm$ 7.3e1      |
| 27  | 26.72 $\pm$ 35.69 | 4.6e5 $\pm$ 12.3e5 | 1.7e1 $\pm$ 4.7e1 | 9.9e4 $\pm$ 27.2e4 | 1.5e2 $\pm$ 4e2    | 3.13e1 $\pm$ 8.5e1      |
| 28  | 25.74 $\pm$ 36.12 | 5.2e5 $\pm$ 14.4e5 | 1.9e1 $\pm$ 5.1e1 | 1.2e5 $\pm$ 3.3e5  | 1.6e2 $\pm$ 4.6e2  | 3.47e1 $\pm$ 9.4e1      |
| 29  | 25.58 $\pm$ 36.24 | 5.7e5 $\pm$ 15.8e5 | 1.9e1 $\pm$ 5.3e1 | 1.2e5 $\pm$ 3.4e5  | 1.6e2 $\pm$ 4.5e2  | 3.89e1 $\pm$ 10.7e1     |
| 30  | 25.12 $\pm$ 36.46 | 6.8e5 $\pm$ 18.8e5 | 2.1e1 $\pm$ 5.9e1 | 1.5e5 $\pm$ 4.3e5  | 2e2 $\pm$ 5.6e2    | 4.12e1 $\pm$ 11.4e1     |
| 31  | 24.83 $\pm$ 36.56 | 7.7e5 $\pm$ 21.6e5 | 2.3e1 $\pm$ 6.4e1 | 1.7e5 $\pm$ 4.9e5  | 2.1e2 $\pm$ 6.1e2  | 4.78e1 $\pm$ 13.2e1     |
| 32  | 24.72 $\pm$ 36.44 | 8.3e5 $\pm$ 22.7e5 | 2.3e1 $\pm$ 6.3e1 | 1.7e5 $\pm$ 4.7e5  | 2e2 $\pm$ 5.6e2    | 5.26e1 $\pm$ 14.7e1     |
| 33  | 24.03 $\pm$ 36.78 | 9.3e5 $\pm$ 25.4e5 | 2.4e1 $\pm$ 6.6e1 | 2e5 $\pm$ 5.5e5    | 2.3e2 $\pm$ 6.3e2  | 5.44e1 $\pm$ 15e1       |
| 34  | 23.62 $\pm$ 36.47 | 1.1e6 $\pm$ 3e6    | 2.6e1 $\pm$ 7.3e1 | 2.3e5 $\pm$ 6.7e5  | 2.7e2 $\pm$ 7.6e2  | 5.91e1 $\pm$ 16.2e1     |
| 35  | 23.46 $\pm$ 36.19 | 1.2e6 $\pm$ 3.5e6  | 2.9e1 $\pm$ 8.2e1 | 2.8e5 $\pm$ 8.1e5  | 3e2 $\pm$ 8.8e2    | 6.6e1 $\pm$ 18.3e1      |
| 36  | 22.48 $\pm$ 36.16 | 1.3e6 $\pm$ 3.7e6  | 2.8e1 $\pm$ 8.1e1 | 2.6e5 $\pm$ 7.5e5  | 2.8e2 $\pm$ 8e2    | 7.47e1 $\pm$ 21.3e1     |
| 37  | 21.58 $\pm$ 36.05 | 1.4e6 $\pm$ 4e6    | 2.9e1 $\pm$ 8.5e1 | 3e5 $\pm$ 8.7e5    | 3.1e2 $\pm$ 9e2    | 7.49e1 $\pm$ 21.4e1     |

The average of the prevalence, the CFU-values per square meter (cfu/sqm) and per gram manure are calculated over all iterations. The CFU values in the intestine as well as the excreted and ingested quantities are obtained by calculating the average over all animals in one iteration at first and then over all iterations.

**Table S14b (log<sub>10</sub> CFU). Calculated numeric values for scenario when day-old chicks are set positive (10<sup>2</sup> CFU bacteria per chick on day 1), combined measures litter 3000 g/m<sup>2</sup> and stocking density 20 kg/m<sup>2</sup>. Setting: 90 chicks, 18 seeder, 72 sentinels, Ross 308, feeding duration 36 days, stocking density 20 kg/m<sup>2</sup>, 3000 g litter/m<sup>2</sup>**

| day | prevalence in % | cfu/sqm           | cfu/g manure      | cfu in intestine  | cfu/g feces       | cfu ingested per animal |
|-----|-----------------|-------------------|-------------------|-------------------|-------------------|-------------------------|
|     | (% mean ± sd)   | (log10 mean ± sd) | (log10 mean ± sd) | (log10 mean ± sd) | (log10 mean ± sd) | (log10 mean ± sd)       |
| 1   | 0 ± 0           | -Inf ± -Inf       | -Inf ± -Inf       | -Inf ± -Inf       | -Inf ± -Inf       | 1.3 ± 0                 |
| 2   | 19.23 ± 0.89    | 4.54 ± 4.31       | 1.04 ± 0.81       | 4.13 ± 3.9        | 2.61 ± 2.38       | -Inf ± 0                |
| 3   | 31.84 ± 17.64   | 4.67 ± 4.35       | 1.14 ± 0.82       | 4.05 ± 3.82       | 2.24 ± 2.01       | 0.33 ± 0.19             |
| 4   | 46.89 ± 22.47   | 4.69 ± 4.37       | 1.13 ± 0.81       | 3.99 ± 3.77       | 1.99 ± 1.77       | 0.56 ± 0.31             |
| 5   | 52.93 ± 24.16   | 4.7 ± 4.38        | 1.11 ± 0.79       | 3.99 ± 3.75       | 1.93 ± 1.68       | 0.61 ± 0.34             |
| 6   | 56.2 ± 24.71    | 4.69 ± 4.44       | 1.07 ± 0.82       | 3.97 ± 3.81       | 1.99 ± 1.83       | 0.65 ± 0.38             |
| 7   | 56.26 ± 27.06   | 4.69 ± 4.51       | 1.04 ± 0.85       | 3.99 ± 3.88       | 1.81 ± 1.7        | 0.68 ± 0.48             |
| 8   | 56.91 ± 28.45   | 4.7 ± 4.57        | 1.01 ± 0.87       | 4 ± 3.92          | 1.77 ± 1.7        | 0.7 ± 0.55              |
| 9   | 55.89 ± 31.21   | 4.7 ± 4.62        | 0.96 ± 0.88       | 3.98 ± 3.97       | 1.7 ± 1.7         | 0.71 ± 0.62             |
| 10  | 52.91 ± 32.89   | 4.7 ± 4.66        | 0.92 ± 0.88       | 3.98 ± 4.01       | 1.64 ± 1.66       | 0.72 ± 0.68             |
| 11  | 48.54 ± 34.94   | 4.71 ± 4.74       | 0.88 ± 0.92       | 4.01 ± 4.11       | 1.61 ± 1.71       | 0.71 ± 0.72             |
| 12  | 47.06 ± 35.37   | 4.74 ± 4.86       | 0.87 ± 0.99       | 4.06 ± 4.25       | 1.61 ± 1.8        | 0.72 ± 0.8              |
| 13  | 43.67 ± 36.45   | 4.77 ± 4.95       | 0.86 ± 1.03       | 4.09 ± 4.31       | 1.61 ± 1.84       | 0.75 ± 0.9              |
| 14  | 40.46 ± 36.85   | 4.81 ± 5.02       | 0.86 ± 1.07       | 4.14 ± 4.39       | 1.62 ± 1.87       | 0.77 ± 0.98             |
| 15  | 38.37 ± 37.01   | 4.86 ± 5.12       | 0.87 ± 1.12       | 4.2 ± 4.49        | 1.64 ± 1.93       | 0.81 ± 1.06             |
| 16  | 36.92 ± 36.96   | 4.92 ± 5.21       | 0.89 ± 1.17       | 4.26 ± 4.58       | 1.7 ± 2.01        | 0.85 ± 1.14             |
| 17  | 35.41 ± 37.11   | 4.98 ± 5.3        | 0.9 ± 1.22        | 4.31 ± 4.67       | 1.71 ± 2.06       | 0.9 ± 1.22              |
| 18  | 34.57 ± 36.97   | 5.04 ± 5.39       | 0.92 ± 1.27       | 4.38 ± 4.76       | 1.74 ± 2.12       | 0.95 ± 1.3              |
| 19  | 33.54 ± 36.85   | 5.12 ± 5.48       | 0.97 ± 1.33       | 4.48 ± 4.86       | 1.82 ± 2.2        | 1 ± 1.37                |
| 20  | 32.36 ± 37.15   | 5.18 ± 5.57       | 0.99 ± 1.38       | 4.52 ± 4.93       | 1.84 ± 2.25       | 1.08 ± 1.46             |
| 21  | 31.47 ± 37.06   | 5.27 ± 5.68       | 1.05 ± 1.45       | 4.64 ± 5.06       | 1.93 ± 2.35       | 1.13 ± 1.53             |
| 22  | 30.84 ± 37.01   | 5.34 ± 5.75       | 1.08 ± 1.5        | 4.68 ± 5.11       | 1.96 ± 2.39       | 1.22 ± 1.63             |
| 23  | 30.38 ± 37.23   | 5.43 ± 5.86       | 1.14 ± 1.57       | 4.79 ± 5.23       | 2.04 ± 2.49       | 1.27 ± 1.7              |
| 24  | 29.82 ± 36.69   | 5.47 ± 5.9        | 1.15 ± 1.58       | 4.8 ± 5.23        | 2.02 ± 2.45       | 1.35 ± 1.79             |
| 25  | 29.07 ± 36.02   | 5.53 ± 5.95       | 1.17 ± 1.6        | 4.87 ± 5.29       | 2.07 ± 2.5        | 1.38 ± 1.82             |
| 26  | 27.31 ± 35.82   | 5.6 ± 6.04        | 1.22 ± 1.65       | 4.96 ± 5.4        | 2.15 ± 2.59       | 1.43 ± 1.86             |
| 27  | 26.72 ± 35.69   | 5.66 ± 6.09       | 1.24 ± 1.67       | 5 ± 5.44          | 2.17 ± 2.6        | 1.5 ± 1.93              |
| 28  | 25.74 ± 36.12   | 5.72 ± 6.16       | 1.27 ± 1.71       | 5.06 ± 5.51       | 2.21 ± 2.66       | 1.54 ± 1.97             |
| 29  | 25.58 ± 36.24   | 5.76 ± 6.2        | 1.28 ± 1.72       | 5.08 ± 5.53       | 2.21 ± 2.65       | 1.59 ± 2.03             |
| 30  | 25.12 ± 36.46   | 5.83 ± 6.27       | 1.33 ± 1.77       | 5.19 ± 5.63       | 2.3 ± 2.75        | 1.61 ± 2.06             |
| 31  | 24.83 ± 36.56   | 5.89 ± 6.34       | 1.36 ± 1.8        | 5.23 ± 5.69       | 2.32 ± 2.78       | 1.68 ± 2.12             |
| 32  | 24.72 ± 36.44   | 5.92 ± 6.36       | 1.36 ± 1.8        | 5.23 ± 5.67       | 2.31 ± 2.75       | 1.72 ± 2.17             |
| 33  | 24.03 ± 36.78   | 5.97 ± 6.4        | 1.38 ± 1.82       | 5.3 ± 5.74        | 2.36 ± 2.8        | 1.74 ± 2.18             |
| 34  | 23.62 ± 36.47   | 6.03 ± 6.47       | 1.42 ± 1.86       | 5.37 ± 5.83       | 2.42 ± 2.88       | 1.77 ± 2.21             |
| 35  | 23.46 ± 36.19   | 6.09 ± 6.55       | 1.46 ± 1.92       | 5.44 ± 5.91       | 2.48 ± 2.94       | 1.82 ± 2.26             |
| 36  | 22.48 ± 36.16   | 6.11 ± 6.56       | 1.45 ± 1.91       | 5.41 ± 5.87       | 2.44 ± 2.9        | 1.87 ± 2.33             |
| 37  | 21.58 ± 36.05   | 6.15 ± 6.61       | 1.47 ± 1.93       | 5.47 ± 5.94       | 2.49 ± 2.95       | 1.87 ± 2.33             |

The average of the prevalence, the CFU-values per square meter (cfu/sqm) and per gram manure are calculated over all iterations. The CFU values in the intestine as well as the excreted and ingested quantities are obtained by calculating the average over all animals in one iteration at first and then over all iterations. The decadic logarithm of zero or negative values is negative infinite (-Inf).

Model results averaged over all 100 iterations with breed: rowan ranger , stocking density: 25 kg/sqm and 90 chicken ( 18 seeders and 72 sentinels )

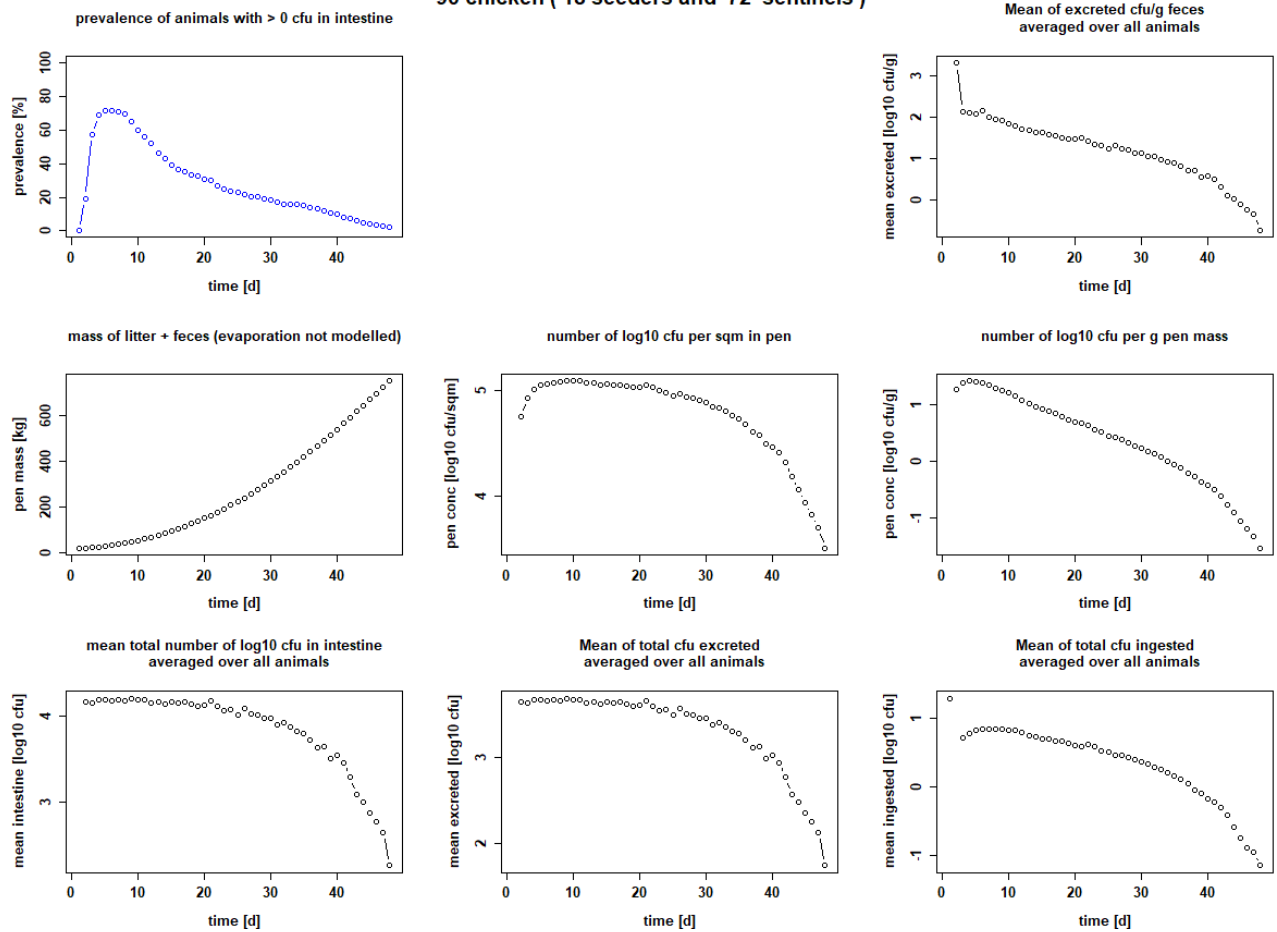

**Figure S15.** Calculated infection dynamic when day-old chicks are set positive ( $10^2$  CFU bacteria per chick on day 1), combined measures slow growing breed, stocking density  $25 \text{ kg/m}^2$  and litter  $3000 \text{ g/m}^2$ . Dotplots with results for 90 chicks, 18 seeder, 72 sentinels, Rowan x Ranger, feeding duration 47 days, stocking density  $25 \text{ kg/m}^2$ ,  $3000 \text{ g litter/m}^2$

**Table S15a (CFU). Calculated numeric values for scenario when day-old chicks are set positive ( $10^2$  CFU bacteria per chick on day 1), combined measures slow growing breed, stocking density 25 kg/m<sup>2</sup> and litter 3000 g/m<sup>2</sup> Setting: 90 chicks, 18 seeder, 72 sentinels, Rowan x Ranger, feeding duration 47 days, stocking density 25 kg/m<sup>2</sup>, 3000 g litter/m<sup>2</sup>**

| day | prevalence in % | cfu/sqm        | cfu/g manure     | cfu in intestine | cfu/g feces      | cfu ingested per animal |
|-----|-----------------|----------------|------------------|------------------|------------------|-------------------------|
|     | (mean ± sd)     | (mean ± sd)    | (mean ± sd)      | (mean ± sd)      | (mean ± sd)      | (mean ± sd)             |
| 1   | 0 ± 0           | 0e0 ± 0        | 0e0 ± 0          | 0e0 ± 0          | 0e0 ± 0          | 2e1 ± 0e1               |
| 2   | 19.22 ± 0.91    | 5.7e4 ± 3.4e4  | 1.8e1 ± 1.1e1    | 1.5e4 ± 0.9e4    | 2e3 ± 1.2e3      | 0e0 ± 0                 |
| 3   | 57.31 ± 24.28   | 8.5e4 ± 4.2e4  | 2.4e1 ± 1.2e1    | 1.4e4 ± 0.8e4    | 1.4e2 ± 0.7e2    | 5.33 ± 3.5              |
| 4   | 69.37 ± 23.78   | 1e5 ± 0.6e5    | 2.6e1 ± 1.4e1    | 1.6e4 ± 1e4      | 1.3e2 ± 0.8e2    | 6.13 ± 3.3              |
| 5   | 71.79 ± 25.67   | 1.1e5 ± 0.7e5  | 2.5e1 ± 1.4e1    | 1.6e4 ± 1e4      | 1.2e2 ± 0.8e2    | 6.72 ± 3.9              |
| 6   | 72.03 ± 28      | 1.2e5 ± 0.7e5  | 2.3e1 ± 1.4e1    | 1.5e4 ± 1e4      | 1.4e2 ± 0.9e2    | 7.13 ± 4.5              |
| 7   | 71.16 ± 28.75   | 1.2e5 ± 0.8e5  | 2.1e1 ± 1.5e1    | 1.6e4 ± 1.3e4    | 10e1 ± 8.1e1     | 7.01 ± 4.5              |
| 8   | 69.78 ± 29.85   | 1.2e5 ± 0.9e5  | 1.9e1 ± 1.5e1    | 1.5e4 ± 1.3e4    | 8.7e1 ± 7.7e1    | 7.04 ± 5.1              |
| 9   | 65.42 ± 33.05   | 1.2e5 ± 1.1e5  | 1.8e1 ± 1.6e1    | 1.6e4 ± 1.7e4    | 8.3e1 ± 8.9e1    | 6.93 ± 5.7              |
| 10  | 60.22 ± 35.22   | 1.2e5 ± 1.3e5  | 1.6e1 ± 1.6e1    | 1.6e4 ± 1.9e4    | 7.1e1 ± 8.4e1    | 6.89 ± 6.6              |
| 11  | 56.13 ± 36.6    | 1.2e5 ± 1.4e5  | 1.4e1 ± 1.6e1    | 1.6e4 ± 2e4      | 6.1e1 ± 7.8e1    | 6.73 ± 7.4              |
| 12  | 52.08 ± 37.69   | 1.2e5 ± 1.4e5  | 1.2e1 ± 1.4e1    | 1.4e4 ± 1.9e4    | 5.2e1 ± 6.9e1    | 6.32 ± 7.7              |
| 13  | 46.63 ± 37.58   | 1.2e5 ± 1.6e5  | 1e1 ± 1.4e1      | 1.5e4 ± 2.2e4    | 5e1 ± 7.4e1      | 5.66 ± 7.6              |
| 14  | 43 ± 37.43      | 1.1e5 ± 1.7e5  | 9 ± 13.4         | 1.4e4 ± 2.3e4    | 4.2e1 ± 7.1e1    | 5.53 ± 8.1              |
| 15  | 39.04 ± 37.98   | 1.1e5 ± 1.9e5  | 8.3 ± 13.6       | 1.5e4 ± 2.7e4    | 4.2e1 ± 7.7e1    | 5.01 ± 8.3              |
| 16  | 36.87 ± 37.51   | 1.1e5 ± 2e5    | 7.4 ± 13         | 1.4e4 ± 2.7e4    | 3.9e1 ± 7.4e1    | 5.01 ± 9.1              |
| 17  | 35.37 ± 37.09   | 1.1e5 ± 2.1e5  | 6.7 ± 12.5       | 1.5e4 ± 2.9e4    | 3.7e1 ± 7.2e1    | 4.78 ± 9.3              |
| 18  | 33.43 ± 36.71   | 1.1e5 ± 2.2e5  | 6 ± 11.7         | 1.4e4 ± 2.9e4    | 3.2e1 ± 6.8e1    | 4.64 ± 9.5              |
| 19  | 32.44 ± 36.16   | 1.1e5 ± 2.2e5  | 5.3 ± 10.9       | 1.3e4 ± 2.9e4    | 3e1 ± 6.5e1      | 4.4 ± 9.5               |
| 20  | 31.02 ± 35.74   | 1.1e5 ± 2.3e5  | 4.8 ± 10.4       | 1.4e4 ± 3.1e4    | 3e1 ± 6.7e1      | 4.12 ± 9.3              |
| 21  | 29.89 ± 34.02   | 1.1e5 ± 2.6e5  | 4.7 ± 10.9       | 1.5e4 ± 3.8e4    | 3.1e1 ± 7.9e1    | 3.97 ± 9.3              |
| 22  | 26.92 ± 33.57   | 1.1e5 ± 2.6e5  | 4.2 ± 9.8        | 1.3e4 ± 3.3e4    | 2.6e1 ± 6.5e1    | 4.14 ± 10.4             |
| 23  | 24.68 ± 32.52   | 10e4 ± 24.7e4  | 3.6 ± 8.8        | 1.2e4 ± 3.1e4    | 2.2e1 ± 5.9e1    | 3.84 ± 9.7              |
| 24  | 23.34 ± 31.78   | 9.7e4 ± 25e4   | 3.2 ± 8.3        | 1.2e4 ± 3.3e4    | 2.1e1 ± 5.8e1    | 3.42 ± 9.2              |
| 25  | 22.94 ± 31      | 8.9e4 ± 23.2e4 | 2.7 ± 7.1        | 1e4 ± 2.8e4      | 1.8e1 ± 4.7e1    | 3.24 ± 9                |
| 26  | 21.8 ± 31.14    | 9.2e4 ± 25.5e4 | 2.7 ± 7.3        | 1.2e4 ± 3.6e4    | 2.1e1 ± 6.1e1    | 2.88 ± 8.1              |
| 27  | 20.5 ± 30.63    | 8.8e4 ± 24.5e4 | 2.4 ± 6.6        | 1.1e4 ± 3.1e4    | 1.7e1 ± 4.9e1    | 2.93 ± 8.6              |
| 28  | 20.1 ± 30.34    | 8.5e4 ± 24.1e4 | 2.1 ± 6          | 1e4 ± 3e4        | 1.6e1 ± 4.6e1    | 2.74 ± 8.1              |
| 29  | 19.1 ± 29.84    | 8e4 ± 22.9e4   | 1.9 ± 5.4        | 9.7e3 ± 28e3     | 1.4e1 ± 4e1      | 2.53 ± 7.7              |
| 30  | 18.19 ± 29.07   | 7.8e4 ± 23e4   | 1.7 ± 5.1        | 9.6e3 ± 30e3     | 1.4e1 ± 4.3e1    | 2.32 ± 7.1              |
| 31  | 17.28 ± 28.38   | 7.1e4 ± 21.2e4 | 1.5 ± 4.4        | 8.1e3 ± 24.9e3   | 1.1e1 ± 3.4e1    | 2.19 ± 6.9              |
| 32  | 16.02 ± 28.09   | 6.8e4 ± 20.8e4 | 1.3 ± 4.1        | 8.4e3 ± 27.1e3   | 1.1e1 ± 3.5e1    | 1.93 ± 6.2              |
| 33  | 15.76 ± 28.05   | 6.4e4 ± 20.1e4 | 1.2 ± 3.7        | 7.6e3 ± 25.1e3   | 9.6 ± 31.9       | 1.81 ± 5.9              |
| 34  | 15.53 ± 28.03   | 5.9e4 ± 18.7e4 | 1 ± 3.2          | 6.8e3 ± 22.3e3   | 8.5 ± 28         | 1.63 ± 5.5              |
| 35  | 14.98 ± 27.33   | 5.4e4 ± 17.9e4 | 8.9e-1 ± 29.4e-1 | 6.4e3 ± 21.9e3   | 7.7 ± 26.6       | 1.44 ± 4.9              |
| 36  | 13.58 ± 26.46   | 4.8e4 ± 16.3e4 | 7.5e-1 ± 25.5e-1 | 5.4e3 ± 18.9e3   | 6.4 ± 22.5       | 1.3 ± 4.6               |
| 37  | 13.17 ± 25.79   | 4.1e4 ± 14.4e4 | 6.1e-1 ± 21.4e-1 | 4.4e3 ± 16.3e3   | 5.1 ± 19         | 1.12 ± 4.1              |
| 38  | 11.8 ± 25.25    | 3.8e4 ± 14.2e4 | 5.4e-1 ± 20e-1   | 4.5e3 ± 18.1e3   | 5 ± 20.3         | 9.1e-1 ± 35e-1          |
| 39  | 10.51 ± 23.9    | 3.2e4 ± 11.8e4 | 4.3e-1 ± 15.9e-1 | 3.2e3 ± 12.5e3   | 3.5 ± 13.7       | 8.1e-1 ± 33.6e-1        |
| 40  | 9.8 ± 22.64     | 3e4 ± 12.4e4   | 3.8e-1 ± 15.8e-1 | 3.5e3 ± 17e3     | 3.8 ± 18.4       | 6.6e-1 ± 27.3e-1        |
| 41  | 8.24 ± 20.64    | 2.6e4 ± 11.6e4 | 3.2e-1 ± 14.2e-1 | 2.9e3 ± 14e3     | 3.1 ± 14.8       | 5.9e-1 ± 27.3e-1        |
| 42  | 7.41 ± 18.9     | 2.1e4 ± 9.7e4  | 2.4e-1 ± 11.4e-1 | 2e3 ± 10.2e3     | 2 ± 10.5         | 5e-1 ± 25.4e-1          |
| 43  | 6.08 ± 16.92    | 1.5e4 ± 7.3e4  | 1.7e-1 ± 8.1e-1  | 1.2e3 ± 6.2e3    | 1.3 ± 6.4        | 3.8e-1 ± 20.1e-1        |
| 44  | 4.88 ± 16.13    | 1.2e4 ± 5.9e4  | 1.2e-1 ± 6.3e-1  | 1e3 ± 6.1e3      | 1 ± 6.4          | 2.6e-1 ± 14.6e-1        |
| 45  | 4.14 ± 14.72    | 8.8e3 ± 46.4e3 | 9e-2 ± 47.8e-2   | 7.6e2 ± 43.8e2   | 7.7e-1 ± 44.7e-1 | 1.8e-1 ± 11.1e-1        |
| 46  | 3.72 ± 13.52    | 6.7e3 ± 37.4e3 | 6.6e-2 ± 37e-2   | 5.9e2 ± 36.8e2   | 5.8e-1 ± 36.6e-1 | 1.3e-1 ± 8.6e-1         |
| 47  | 2.84 ± 12.39    | 5.1e3 ± 30.2e3 | 4.8e-2 ± 28.8e-2 | 4.5e2 ± 30.4e2   | 4.5e-1 ± 30.5e-1 | 1.1e-1 ± 7.2e-1         |
| 48  | 1.83 ± 8.97     | 3.3e3 ± 19.9e3 | 3e-2 ± 18.3e-2   | 1.8e2 ± 13.3e2   | 1.8e-1 ± 13.1e-1 | 7e-2 ± 53.7e-2          |

The average of the prevalence, the CFU-values per square meter (cfu/sqm) and per gram manure are calculated over all iterations. The CFU values in the intestine as well as the excreted and ingested quantities are obtained by calculating the average over all animals in one iteration at first and then over all iterations.

**Table S15b (log<sub>10</sub> CFU). Calculated numeric values for scenario when day-old chicks are set positive (10<sup>2</sup> CFU bacteria per chick on day 1), combined measures slow growing breed, stocking density 25 kg/m<sup>2</sup> and litter 3000 g/m<sup>2</sup> Setting: 90 chicks, 18 seeder, 72 sentinels, Rowan x Ranger, feeding duration 47 days, stocking density 25 kg/m<sup>2</sup>, 3000 g litter/m<sup>2</sup>**

| day | prevalence in % | cfu/sqm           | cfu/g manure      | cfu in intestine  | cfu/g feces       | cfu ingested per animal |
|-----|-----------------|-------------------|-------------------|-------------------|-------------------|-------------------------|
|     | (% mean ± sd)   | (log10 mean ± sd) | (log10 mean ± sd) | (log10 mean ± sd) | (log10 mean ± sd) | (log10 mean ± sd)       |
| 1   | 0 ± 0           | -Inf ± -Inf       | -Inf ± -Inf       | -Inf ± -Inf       | -Inf ± -Inf       | 1.3 ± 0                 |
| 2   | 19.22 ± 0.91    | 4.76 ± 4.53       | 1.26 ± 1.03       | 4.16 ± 3.93       | 3.3 ± 3.07        | -Inf ± 0                |
| 3   | 57.31 ± 24.28   | 4.93 ± 4.62       | 1.38 ± 1.07       | 4.16 ± 3.88       | 2.14 ± 1.86       | 0.73 ± 0.54             |
| 4   | 69.37 ± 23.78   | 5.02 ± 4.74       | 1.41 ± 1.14       | 4.19 ± 3.98       | 2.11 ± 1.9        | 0.79 ± 0.52             |
| 5   | 71.79 ± 25.67   | 5.05 ± 4.81       | 1.4 ± 1.16        | 4.19 ± 4.01       | 2.08 ± 1.9        | 0.83 ± 0.59             |
| 6   | 72.03 ± 28      | 5.07 ± 4.84       | 1.37 ± 1.14       | 4.18 ± 4          | 2.15 ± 1.96       | 0.85 ± 0.65             |
| 7   | 71.16 ± 28.75   | 5.08 ± 4.91       | 1.33 ± 1.17       | 4.2 ± 4.11        | 2 ± 1.91          | 0.85 ± 0.65             |
| 8   | 69.78 ± 29.85   | 5.08 ± 4.96       | 1.28 ± 1.16       | 4.19 ± 4.13       | 1.94 ± 1.88       | 0.85 ± 0.71             |
| 9   | 65.42 ± 33.05   | 5.09 ± 5.05       | 1.24 ± 1.2        | 4.21 ± 4.24       | 1.92 ± 1.95       | 0.84 ± 0.76             |
| 10  | 60.22 ± 35.22   | 5.09 ± 5.1        | 1.19 ± 1.2        | 4.2 ± 4.27        | 1.85 ± 1.92       | 0.84 ± 0.82             |
| 11  | 56.13 ± 36.6    | 5.09 ± 5.15       | 1.14 ± 1.2        | 4.2 ± 4.3         | 1.79 ± 1.89       | 0.83 ± 0.87             |
| 12  | 52.08 ± 37.69   | 5.07 ± 5.16       | 1.07 ± 1.15       | 4.15 ± 4.28       | 1.71 ± 1.84       | 0.8 ± 0.88              |
| 13  | 46.63 ± 37.58   | 5.07 ± 5.19       | 1.02 ± 1.15       | 4.17 ± 4.35       | 1.69 ± 1.87       | 0.75 ± 0.88             |
| 14  | 43 ± 37.43      | 5.05 ± 5.22       | 0.96 ± 1.13       | 4.14 ± 4.36       | 1.63 ± 1.85       | 0.74 ± 0.91             |
| 15  | 39.04 ± 37.98   | 5.06 ± 5.28       | 0.92 ± 1.13       | 4.17 ± 4.43       | 1.63 ± 1.89       | 0.7 ± 0.92              |
| 16  | 36.87 ± 37.51   | 5.05 ± 5.3        | 0.87 ± 1.11       | 4.15 ± 4.43       | 1.59 ± 1.87       | 0.7 ± 0.96              |
| 17  | 35.37 ± 37.09   | 5.06 ± 5.32       | 0.83 ± 1.1        | 4.16 ± 4.46       | 1.56 ± 1.86       | 0.68 ± 0.97             |
| 18  | 33.43 ± 36.71   | 5.05 ± 5.33       | 0.78 ± 1.07       | 4.14 ± 4.46       | 1.51 ± 1.83       | 0.67 ± 0.98             |
| 19  | 32.44 ± 36.16   | 5.03 ± 5.34       | 0.72 ± 1.04       | 4.12 ± 4.46       | 1.47 ± 1.81       | 0.64 ± 0.98             |
| 20  | 31.02 ± 35.74   | 5.03 ± 5.36       | 0.68 ± 1.02       | 4.13 ± 4.49       | 1.47 ± 1.82       | 0.61 ± 0.97             |
| 21  | 29.89 ± 34.02   | 5.05 ± 5.42       | 0.67 ± 1.04       | 4.18 ± 4.58       | 1.5 ± 1.9         | 0.6 ± 0.97              |
| 22  | 26.92 ± 33.57   | 5.04 ± 5.41       | 0.62 ± 0.99       | 4.12 ± 4.51       | 1.42 ± 1.81       | 0.62 ± 1.02             |
| 23  | 24.68 ± 32.52   | 5 ± 5.39          | 0.55 ± 0.95       | 4.07 ± 4.49       | 1.34 ± 1.77       | 0.58 ± 0.99             |
| 24  | 23.34 ± 31.78   | 4.99 ± 5.4        | 0.5 ± 0.92        | 4.08 ± 4.52       | 1.32 ± 1.76       | 0.53 ± 0.96             |
| 25  | 22.94 ± 31      | 4.95 ± 5.37       | 0.43 ± 0.85       | 4.01 ± 4.44       | 1.24 ± 1.67       | 0.51 ± 0.95             |
| 26  | 21.8 ± 31.14    | 4.97 ± 5.41       | 0.42 ± 0.86       | 4.09 ± 4.56       | 1.32 ± 1.79       | 0.46 ± 0.91             |
| 27  | 20.5 ± 30.63    | 4.94 ± 5.39       | 0.37 ± 0.82       | 4.03 ± 4.49       | 1.23 ± 1.69       | 0.47 ± 0.94             |
| 28  | 20.1 ± 30.34    | 4.93 ± 5.38       | 0.33 ± 0.78       | 4.02 ± 4.48       | 1.2 ± 1.66        | 0.44 ± 0.91             |
| 29  | 19.1 ± 29.84    | 4.9 ± 5.36        | 0.27 ± 0.73       | 3.98 ± 4.45       | 1.14 ± 1.61       | 0.4 ± 0.88              |
| 30  | 18.19 ± 29.07   | 4.89 ± 5.36       | 0.23 ± 0.7        | 3.98 ± 4.48       | 1.13 ± 1.63       | 0.37 ± 0.85             |
| 31  | 17.28 ± 28.38   | 4.85 ± 5.33       | 0.17 ± 0.64       | 3.91 ± 4.4        | 1.04 ± 1.53       | 0.34 ± 0.84             |
| 32  | 16.02 ± 28.09   | 4.83 ± 5.32       | 0.12 ± 0.61       | 3.92 ± 4.43       | 1.04 ± 1.55       | 0.29 ± 0.79             |
| 33  | 15.76 ± 28.05   | 4.81 ± 5.3        | 0.07 ± 0.57       | 3.88 ± 4.4        | 0.98 ± 1.5        | 0.26 ± 0.77             |
| 34  | 15.53 ± 28.03   | 4.77 ± 5.27       | 0.01 ± 0.51       | 3.83 ± 4.35       | 0.93 ± 1.45       | 0.21 ± 0.74             |
| 35  | 14.98 ± 27.33   | 4.73 ± 5.25       | -0.05 ± 0.47      | 3.8 ± 4.34        | 0.89 ± 1.42       | 0.16 ± 0.69             |
| 36  | 13.58 ± 26.46   | 4.68 ± 5.21       | -0.12 ± 0.41      | 3.73 ± 4.28       | 0.8 ± 1.35        | 0.11 ± 0.66             |
| 37  | 13.17 ± 25.79   | 4.61 ± 5.16       | -0.21 ± 0.33      | 3.64 ± 4.21       | 0.7 ± 1.28        | 0.05 ± 0.61             |
| 38  | 11.8 ± 25.25    | 4.58 ± 5.15       | -0.27 ± 0.3       | 3.65 ± 4.26       | 0.7 ± 1.31        | -0.04 ± 0.54            |
| 39  | 10.51 ± 23.9    | 4.5 ± 5.07        | -0.37 ± 0.2       | 3.51 ± 4.1        | 0.55 ± 1.14       | -0.09 ± 0.53            |
| 40  | 9.8 ± 22.64     | 4.47 ± 5.09       | -0.42 ± 0.2       | 3.54 ± 4.23       | 0.58 ± 1.26       | -0.18 ± 0.44            |
| 41  | 8.24 ± 20.64    | 4.42 ± 5.07       | -0.49 ± 0.15      | 3.46 ± 4.15       | 0.49 ± 1.17       | -0.23 ± 0.44            |
| 42  | 7.41 ± 18.9     | 4.32 ± 4.99       | -0.61 ± 0.06      | 3.29 ± 4.01       | 0.31 ± 1.02       | -0.3 ± 0.4              |
| 43  | 6.08 ± 16.92    | 4.18 ± 4.86       | -0.77 ± -0.09     | 3.09 ± 3.79       | 0.11 ± 0.81       | -0.42 ± 0.3             |
| 44  | 4.88 ± 16.13    | 4.06 ± 4.77       | -0.91 ± -0.2      | 3 ± 3.79          | 0.02 ± 0.8        | -0.59 ± 0.16            |
| 45  | 4.14 ± 14.72    | 3.94 ± 4.67       | -1.04 ± -0.32     | 2.88 ± 3.64       | -0.11 ± 0.65      | -0.74 ± 0.05            |
| 46  | 3.72 ± 13.52    | 3.83 ± 4.57       | -1.18 ± -0.43     | 2.77 ± 3.57       | -0.24 ± 0.56      | -0.89 ± -0.07           |
| 47  | 2.84 ± 12.39    | 3.71 ± 4.48       | -1.31 ± -0.54     | 2.65 ± 3.48       | -0.35 ± 0.48      | -0.96 ± -0.14           |
| 48  | 1.83 ± 8.97     | 3.51 ± 4.3        | -1.52 ± -0.74     | 2.26 ± 3.12       | -0.75 ± 0.12      | -1.15 ± -0.27           |

The average of the prevalence, the CFU-values per square meter (cfu/sqm) and per gram manure are calculated over all iterations. The CFU values in the intestine as well as the excreted and ingested quantities are obtained by calculating the average over all animals in one iteration at first and then over all iterations. The decadic logarithm of zero or negative values is negative infinite (-Inf).

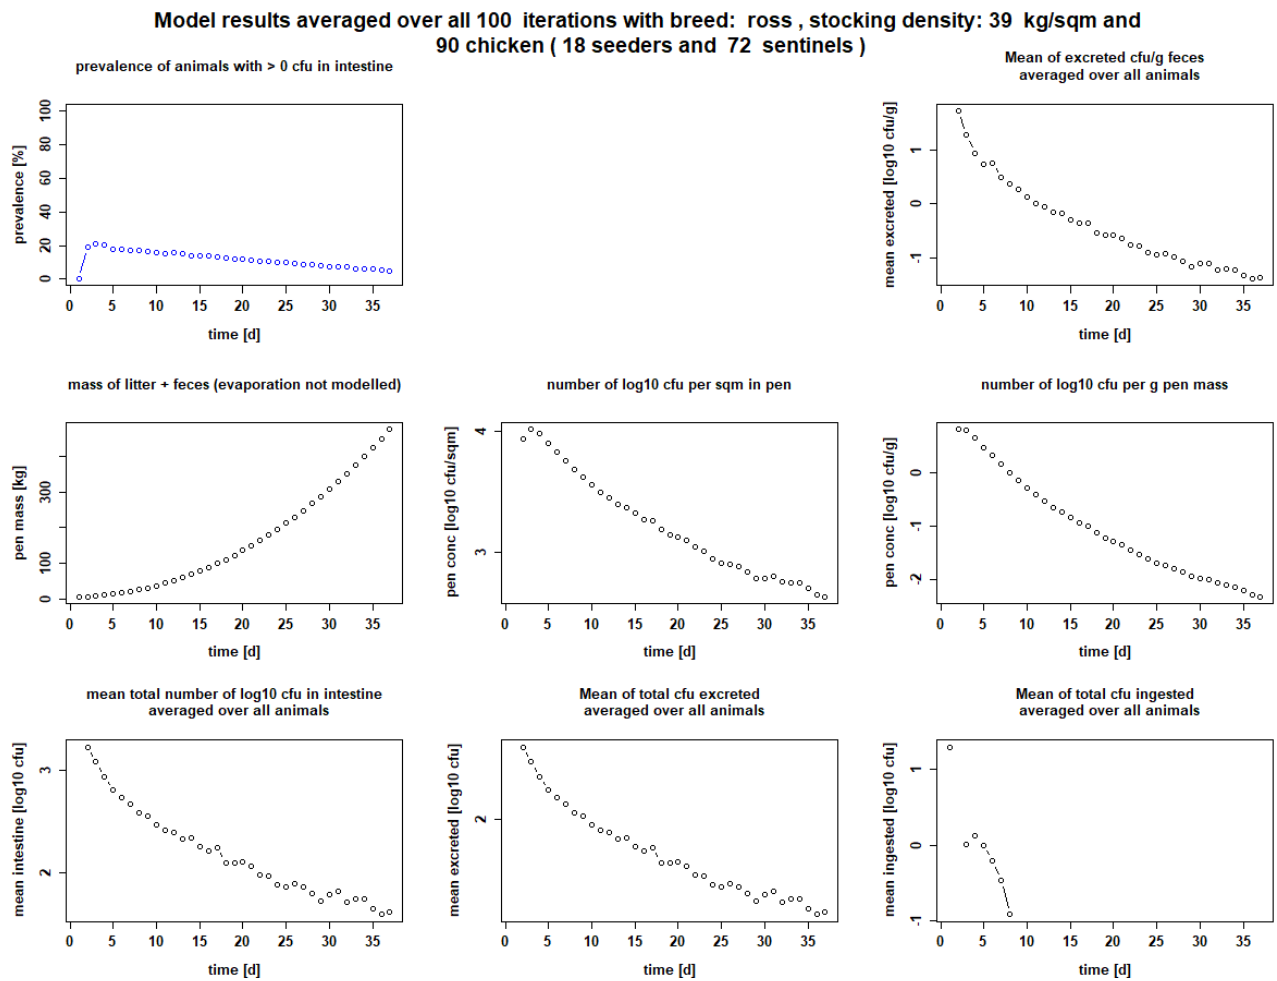

**Figure S16. Calculated infection dynamic when day-old chicks are set positive ( $10^2$  CFU bacteria per chick on day 1), measure lower growth rate for ESBLs in the intestines.** Dotplots with results for 90 chicks, 18 seeder, 72 sentinels, Ross 308, feeding duration 36 days, stocking density 39 kg/m<sup>2</sup>, 1000 g litter/m<sup>2</sup>

**Table S16a (CFU). Calculated numeric values for scenario when day-old chicks are set positive ( $10^2$  CFU bacteria per chick on day 1), measure lower growth rate for ESBLs in the intestines.** Setting: 90 chicks, 18 seeder, 72 sentinels, Ross 308, feeding duration 36 days, stocking density 39 kg/m<sup>2</sup>, 1000 g litter/m<sup>2</sup>

| day | prevalence in %  | cfu/sqm           | cfu/g manure        | cfu in intestine  | cfu/g feces         | cfu ingested per animal |
|-----|------------------|-------------------|---------------------|-------------------|---------------------|-------------------------|
|     | (mean $\pm$ sd)  | (mean $\pm$ sd)   | (mean $\pm$ sd)     | (mean $\pm$ sd)   | (mean $\pm$ sd)     | (mean $\pm$ sd)         |
| 1   | 0 $\pm$ 0        | 0e0 $\pm$ 0       | 0e0 $\pm$ 0         | 0e0 $\pm$ 0       | 0e0 $\pm$ 0         | 2e1 $\pm$ 0e1           |
| 2   | 19.22 $\pm$ 0.9  | 8.5e3 $\pm$ 4.8e3 | 6.4 $\pm$ 3.6       | 1.7e3 $\pm$ 1e3   | 5.1e1 $\pm$ 2.9e1   | 0e0 $\pm$ 0             |
| 3   | 20.68 $\pm$ 6.97 | 1e4 $\pm$ 0.4e4   | 6.2 $\pm$ 2.2       | 1.2e3 $\pm$ 0.5e3 | 1.9e1 $\pm$ 0.8e1   | 1.02 $\pm$ 0.9          |
| 4   | 20.02 $\pm$ 6.37 | 9.5e3 $\pm$ 3.3e3 | 4.4 $\pm$ 1.5       | 8.7e2 $\pm$ 4.8e2 | 8.7 $\pm$ 4.8       | 1.32 $\pm$ 0.7          |
| 5   | 18 $\pm$ 3.07    | 8e3 $\pm$ 2.3e3   | 2.9 $\pm$ 0.8       | 6.4e2 $\pm$ 3.1e2 | 5.5 $\pm$ 2.7       | 1 $\pm$ 0.6             |
| 6   | 17.46 $\pm$ 1.52 | 6.7e3 $\pm$ 1.9e3 | 2.1 $\pm$ 0.6       | 5.5e2 $\pm$ 3.2e2 | 5.7 $\pm$ 3.4       | 6.2e-1 $\pm$ 5.1e-1     |
| 7   | 16.98 $\pm$ 1.48 | 5.7e3 $\pm$ 1.7e3 | 1.4 $\pm$ 0.4       | 4.7e2 $\pm$ 2.8e2 | 3.1 $\pm$ 1.8       | 3.4e-1 $\pm$ 4.8e-1     |
| 8   | 16.84 $\pm$ 1.7  | 4.8e3 $\pm$ 1.4e3 | 10e-1 $\pm$ 2.8e-1  | 3.9e2 $\pm$ 2.2e2 | 2.3 $\pm$ 1.3       | 1.2e-1 $\pm$ 3.3e-1     |
| 9   | 16.49 $\pm$ 1.96 | 4.2e3 $\pm$ 1.2e3 | 7.3e-1 $\pm$ 2.1e-1 | 3.6e2 $\pm$ 2.1e2 | 1.9 $\pm$ 1.1       | 0e0 $\pm$ 0             |
| 10  | 15.8 $\pm$ 2.05  | 3.6e3 $\pm$ 1.1e3 | 5.2e-1 $\pm$ 1.6e-1 | 3e2 $\pm$ 1.8e2   | 1.3 $\pm$ 0.8       | 0e0 $\pm$ 0             |
| 11  | 15.13 $\pm$ 2.09 | 3.1e3 $\pm$ 1.2e3 | 3.8e-1 $\pm$ 1.4e-1 | 2.6e2 $\pm$ 1.8e2 | 1 $\pm$ 0.7         | 0e0 $\pm$ 0             |
| 12  | 15.53 $\pm$ 2.09 | 2.8e3 $\pm$ 1e3   | 2.9e-1 $\pm$ 1e-1   | 2.5e2 $\pm$ 1.6e2 | 8.9e-1 $\pm$ 5.8e-1 | 0e0 $\pm$ 0             |
| 13  | 14.83 $\pm$ 2.16 | 2.5e3 $\pm$ 0.9e3 | 2.2e-1 $\pm$ 0.8e-1 | 2.2e2 $\pm$ 1.3e2 | 7.2e-1 $\pm$ 4.3e-1 | 0e0 $\pm$ 0             |
| 14  | 14.14 $\pm$ 2.2  | 2.4e3 $\pm$ 0.9e3 | 1.8e-1 $\pm$ 0.7e-1 | 2.2e2 $\pm$ 1.4e2 | 6.7e-1 $\pm$ 4.3e-1 | 0e0 $\pm$ 0             |
| 15  | 13.57 $\pm$ 2.62 | 2.1e3 $\pm$ 0.8e3 | 1.4e-1 $\pm$ 0.5e-1 | 1.8e2 $\pm$ 1.2e2 | 5.1e-1 $\pm$ 3.3e-1 | 0e0 $\pm$ 0             |
| 16  | 13.71 $\pm$ 2.1  | 1.9e3 $\pm$ 0.6e3 | 1.1e-1 $\pm$ 0.4e-1 | 1.6e2 $\pm$ 1e2   | 4.4e-1 $\pm$ 2.7e-1 | 0e0 $\pm$ 0             |
| 17  | 12.88 $\pm$ 2.3  | 1.8e3 $\pm$ 0.6e3 | 9.9e-2 $\pm$ 3.3e-2 | 1.8e2 $\pm$ 1e2   | 4.4e-1 $\pm$ 2.5e-1 | 0e0 $\pm$ 0             |
| 18  | 12.36 $\pm$ 2.45 | 1.5e3 $\pm$ 0.5e3 | 7.5e-2 $\pm$ 2.5e-2 | 1.3e2 $\pm$ 0.8e2 | 2.9e-1 $\pm$ 1.9e-1 | 0e0 $\pm$ 0             |
| 19  | 12.11 $\pm$ 2.45 | 1.4e3 $\pm$ 0.4e3 | 6.1e-2 $\pm$ 2e-2   | 1.2e2 $\pm$ 0.7e2 | 2.7e-1 $\pm$ 1.6e-1 | 0e0 $\pm$ 0             |
| 20  | 11.57 $\pm$ 2.34 | 1.3e3 $\pm$ 0.5e3 | 5.3e-2 $\pm$ 1.9e-2 | 1.3e2 $\pm$ 0.9e2 | 2.7e-1 $\pm$ 1.8e-1 | 0e0 $\pm$ 0             |
| 21  | 11.14 $\pm$ 2.36 | 1.3e3 $\pm$ 0.4e3 | 4.5e-2 $\pm$ 1.6e-2 | 1.2e2 $\pm$ 0.7e2 | 2.3e-1 $\pm$ 1.4e-1 | 0e0 $\pm$ 0             |
| 22  | 10.57 $\pm$ 2.31 | 1.1e3 $\pm$ 0.4e3 | 3.6e-2 $\pm$ 1.4e-2 | 9.4e1 $\pm$ 7.7e1 | 1.8e-1 $\pm$ 1.5e-1 | 0e0 $\pm$ 0             |
| 23  | 10.39 $\pm$ 2.2  | 1e3 $\pm$ 0.4e3   | 3.1e-2 $\pm$ 1.2e-2 | 9.2e1 $\pm$ 6.4e1 | 1.7e-1 $\pm$ 1.2e-1 | 0e0 $\pm$ 0             |
| 24  | 9.7 $\pm$ 2.31   | 8.9e2 $\pm$ 3e2   | 2.5e-2 $\pm$ 0.8e-2 | 7.7e1 $\pm$ 4.7e1 | 1.3e-1 $\pm$ 0.8e-1 | 0e0 $\pm$ 0             |
| 25  | 9.62 $\pm$ 2.45  | 8.1e2 $\pm$ 2.9e2 | 2.1e-2 $\pm$ 0.7e-2 | 7.3e1 $\pm$ 5e1   | 1.2e-1 $\pm$ 0.8e-1 | 0e0 $\pm$ 0             |
| 26  | 9.1 $\pm$ 2.49   | 8e2 $\pm$ 2.9e2   | 1.9e-2 $\pm$ 0.7e-2 | 7.7e1 $\pm$ 5.3e1 | 1.2e-1 $\pm$ 0.8e-1 | 0e0 $\pm$ 0             |
| 27  | 8.81 $\pm$ 2.36  | 7.6e2 $\pm$ 3e2   | 1.7e-2 $\pm$ 0.7e-2 | 7.3e1 $\pm$ 5e1   | 1.1e-1 $\pm$ 0.7e-1 | 0e0 $\pm$ 0             |
| 28  | 8.58 $\pm$ 2.55  | 6.9e2 $\pm$ 2.8e2 | 1.4e-2 $\pm$ 0.6e-2 | 6.2e1 $\pm$ 5.1e1 | 8.7e-2 $\pm$ 7.2e-2 | 0e0 $\pm$ 0             |
| 29  | 7.68 $\pm$ 2.23  | 6.1e2 $\pm$ 2.5e2 | 1.1e-2 $\pm$ 0.5e-2 | 5.3e1 $\pm$ 4.2e1 | 7e-2 $\pm$ 5.5e-2   | 0e0 $\pm$ 0             |
| 30  | 7.59 $\pm$ 2.26  | 6.1e2 $\pm$ 2.9e2 | 1.1e-2 $\pm$ 0.5e-2 | 6.1e1 $\pm$ 4.9e1 | 7.9e-2 $\pm$ 6.4e-2 | 0e0 $\pm$ 0             |
| 31  | 7.53 $\pm$ 2.13  | 6.3e2 $\pm$ 3e2   | 1e-2 $\pm$ 0.5e-2   | 6.5e1 $\pm$ 5.1e1 | 8.1e-2 $\pm$ 6.3e-2 | 0e0 $\pm$ 0             |
| 32  | 7.12 $\pm$ 2.16  | 5.7e2 $\pm$ 2.8e2 | 8.7e-3 $\pm$ 4.3e-3 | 5.1e1 $\pm$ 4.8e1 | 6.1e-2 $\pm$ 5.7e-2 | 0e0 $\pm$ 0             |
| 33  | 6.22 $\pm$ 2.51  | 5.6e2 $\pm$ 2.9e2 | 8.1e-3 $\pm$ 4.2e-3 | 5.5e1 $\pm$ 4.8e1 | 6.3e-2 $\pm$ 5.5e-2 | 0e0 $\pm$ 0             |
| 34  | 6.26 $\pm$ 2.17  | 5.6e2 $\pm$ 2.9e2 | 7.5e-3 $\pm$ 4e-3   | 5.5e1 $\pm$ 4.8e1 | 6.2e-2 $\pm$ 5.5e-2 | 0e0 $\pm$ 0             |
| 35  | 6.19 $\pm$ 2.15  | 5e2 $\pm$ 2.6e2   | 6.4e-3 $\pm$ 3.3e-3 | 4.5e1 $\pm$ 4.1e1 | 4.8e-2 $\pm$ 4.5e-2 | 0e0 $\pm$ 0             |
| 36  | 5.36 $\pm$ 2.06  | 4.5e2 $\pm$ 2.2e2 | 5.3e-3 $\pm$ 2.7e-3 | 3.9e1 $\pm$ 3.6e1 | 4.1e-2 $\pm$ 3.8e-2 | 0e0 $\pm$ 0             |
| 37  | 4.63 $\pm$ 2.22  | 4.3e2 $\pm$ 2.4e2 | 4.9e-3 $\pm$ 2.7e-3 | 4.1e1 $\pm$ 4.3e1 | 4.3e-2 $\pm$ 4.4e-2 | 0e0 $\pm$ 0             |

The average of the prevalence, the CFU-values per square meter (cfu/sqm) and per gram manure are calculated over all iterations. The CFU values in the intestine as well as the excreted and ingested quantities are obtained by calculating the average over all animals in one iteration at first and then over all iterations.

**Table S16b (log<sub>10</sub> CFU). Calculated numeric values for scenario when day-old chicks are set positive (10<sup>2</sup> CFU bacteria per chick on day 1), measure lower growth rate for ESBIs in the intestines.** Setting: 90 chicks, 18 seeder, 72 sentinels, Ross 308, feeding duration 36 days, stocking density 39 kg/m<sup>2</sup>, 1000 g litter/m<sup>2</sup>

| day | prevalence in % | cfu/sqm           | cfu/g manure      | cfu in intestine  | cfu/g feces       | cfu ingested per animal |
|-----|-----------------|-------------------|-------------------|-------------------|-------------------|-------------------------|
|     | (% mean ± sd)   | (log10 mean ± sd) | (log10 mean ± sd) | (log10 mean ± sd) | (log10 mean ± sd) | (log10 mean ± sd)       |
| 1   | 0 ± 0           | -Inf ± -Inf       | -Inf ± -Inf       | -Inf ± -Inf       | -Inf ± -Inf       | 1.3 ± 0                 |
| 2   | 19.22 ± 0.9     | 3.93 ± 3.68       | 0.81 ± 0.56       | 3.23 ± 2.98       | 1.71 ± 1.46       | -Inf ± 0                |
| 3   | 20.68 ± 6.97    | 4.02 ± 3.57       | 0.8 ± 0.35        | 3.08 ± 2.71       | 1.27 ± 0.9        | 0.01 ± -0.05            |
| 4   | 20.02 ± 6.37    | 3.98 ± 3.52       | 0.64 ± 0.19       | 2.94 ± 2.68       | 0.94 ± 0.68       | 0.12 ± -0.16            |
| 5   | 18 ± 3.07       | 3.9 ± 3.35        | 0.46 ± -0.08      | 2.81 ± 2.5        | 0.74 ± 0.43       | 0 ± -0.25               |
| 6   | 17.46 ± 1.52    | 3.83 ± 3.28       | 0.32 ± -0.22      | 2.74 ± 2.51       | 0.76 ± 0.53       | -0.21 ± -0.29           |
| 7   | 16.98 ± 1.48    | 3.76 ± 3.24       | 0.16 ± -0.36      | 2.67 ± 2.44       | 0.49 ± 0.27       | -0.47 ± -0.32           |
| 8   | 16.84 ± 1.7     | 3.68 ± 3.14       | 0 ± -0.55         | 2.59 ± 2.34       | 0.36 ± 0.11       | -0.92 ± -0.49           |
| 9   | 16.49 ± 1.96    | 3.63 ± 3.09       | -0.14 ± -0.67     | 2.56 ± 2.32       | 0.28 ± 0.04       | -Inf ± 0                |
| 10  | 15.8 ± 2.05     | 3.56 ± 3.04       | -0.28 ± -0.8      | 2.47 ± 2.25       | 0.12 ± -0.1       | -Inf ± 0                |
| 11  | 15.13 ± 2.09    | 3.49 ± 3.07       | -0.42 ± -0.84     | 2.42 ± 2.26       | 0.02 ± -0.14      | -Inf ± 0                |
| 12  | 15.53 ± 2.09    | 3.45 ± 3          | -0.53 ± -0.98     | 2.4 ± 2.21        | -0.05 ± -0.23     | -Inf ± 0                |
| 13  | 14.83 ± 2.16    | 3.4 ± 2.95        | -0.65 ± -1.09     | 2.34 ± 2.11       | -0.14 ± -0.37     | -Inf ± 0                |
| 14  | 14.14 ± 2.2     | 3.37 ± 2.93       | -0.73 ± -1.17     | 2.34 ± 2.15       | -0.17 ± -0.37     | -Inf ± 0                |
| 15  | 13.57 ± 2.62    | 3.32 ± 2.88       | -0.84 ± -1.28     | 2.26 ± 2.08       | -0.29 ± -0.48     | -Inf ± 0                |
| 16  | 13.71 ± 2.1     | 3.27 ± 2.79       | -0.94 ± -1.42     | 2.21 ± 2          | -0.35 ± -0.56     | -Inf ± 0                |
| 17  | 12.88 ± 2.3     | 3.26 ± 2.79       | -1 ± -1.48        | 2.25 ± 2          | -0.36 ± -0.6      | -Inf ± 0                |
| 18  | 12.36 ± 2.45    | 3.19 ± 2.71       | -1.12 ± -1.6      | 2.1 ± 1.91        | -0.54 ± -0.73     | -Inf ± 0                |
| 19  | 12.11 ± 2.45    | 3.15 ± 2.65       | -1.21 ± -1.71     | 2.1 ± 1.86        | -0.56 ± -0.8      | -Inf ± 0                |
| 20  | 11.57 ± 2.34    | 3.13 ± 2.68       | -1.27 ± -1.72     | 2.11 ± 1.93       | -0.57 ± -0.75     | -Inf ± 0                |
| 21  | 11.14 ± 2.36    | 3.1 ± 2.64        | -1.34 ± -1.8      | 2.07 ± 1.86       | -0.64 ± -0.84     | -Inf ± 0                |
| 22  | 10.57 ± 2.31    | 3.04 ± 2.64       | -1.44 ± -1.84     | 1.98 ± 1.88       | -0.75 ± -0.84     | -Inf ± 0                |
| 23  | 10.39 ± 2.2     | 3.01 ± 2.62       | -1.52 ± -1.91     | 1.96 ± 1.81       | -0.78 ± -0.94     | -Inf ± 0                |
| 24  | 9.7 ± 2.31      | 2.95 ± 2.48       | -1.61 ± -2.08     | 1.89 ± 1.68       | -0.89 ± -1.1      | -Inf ± 0                |
| 25  | 9.62 ± 2.45     | 2.91 ± 2.46       | -1.69 ± -2.13     | 1.86 ± 1.7        | -0.93 ± -1.1      | -Inf ± 0                |
| 26  | 9.1 ± 2.49      | 2.9 ± 2.46        | -1.73 ± -2.17     | 1.89 ± 1.73       | -0.91 ± -1.08     | -Inf ± 0                |
| 27  | 8.81 ± 2.36     | 2.88 ± 2.48       | -1.78 ± -2.18     | 1.86 ± 1.7        | -0.97 ± -1.13     | -Inf ± 0                |
| 28  | 8.58 ± 2.55     | 2.84 ± 2.45       | -1.85 ± -2.25     | 1.79 ± 1.71       | -1.06 ± -1.14     | -Inf ± 0                |
| 29  | 7.68 ± 2.23     | 2.79 ± 2.4        | -1.94 ± -2.32     | 1.72 ± 1.62       | -1.15 ± -1.26     | -Inf ± 0                |
| 30  | 7.59 ± 2.26     | 2.79 ± 2.46       | -1.97 ± -2.29     | 1.78 ± 1.69       | -1.1 ± -1.19      | -Inf ± 0                |
| 31  | 7.53 ± 2.13     | 2.8 ± 2.47        | -1.99 ± -2.32     | 1.81 ± 1.71       | -1.09 ± -1.2      | -Inf ± 0                |
| 32  | 7.12 ± 2.16     | 2.76 ± 2.45       | -2.06 ± -2.37     | 1.71 ± 1.68       | -1.22 ± -1.24     | -Inf ± 0                |
| 33  | 6.22 ± 2.51     | 2.75 ± 2.47       | -2.09 ± -2.38     | 1.74 ± 1.68       | -1.2 ± -1.26      | -Inf ± 0                |
| 34  | 6.26 ± 2.17     | 2.75 ± 2.47       | -2.12 ± -2.4      | 1.74 ± 1.68       | -1.21 ± -1.26     | -Inf ± 0                |
| 35  | 6.19 ± 2.15     | 2.7 ± 2.41        | -2.2 ± -2.48      | 1.65 ± 1.62       | -1.32 ± -1.35     | -Inf ± 0                |
| 36  | 5.36 ± 2.06     | 2.65 ± 2.35       | -2.27 ± -2.58     | 1.59 ± 1.56       | -1.38 ± -1.42     | -Inf ± 0                |
| 37  | 4.63 ± 2.22     | 2.63 ± 2.38       | -2.31 ± -2.57     | 1.62 ± 1.63       | -1.37 ± -1.35     | -Inf ± 0                |

The average of the prevalence, the CFU-values per square meter (cfu/sqm) and per gram manure are calculated over all iterations. The CFU values in the intestine as well as the excreted and ingested quantities are obtained by calculating the average over all animals in one iteration at first and then over all iterations. The decadic logarithm of zero or negative values is negative infinite (-Inf).



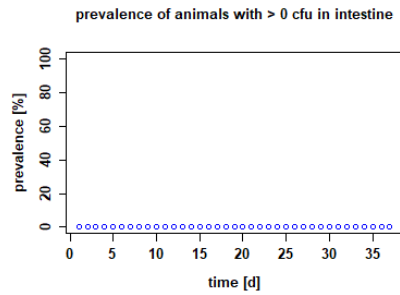

**Figure S17.** Calculated infection dynamic for the scenario when the pen is contaminated with  $10^5$  CFU ( $10^5$  CFU in 5.38 kg/litter/m<sup>2</sup>; i.e. 1.27 log<sub>10</sub>/g litter) at the beginning of the fattening period (day 1). Dotplots with results for 90 negative birds, Ross 308, feeding duration 36 days, stocking density 39 kg/m<sup>2</sup>, 1000 g litter/m<sup>2</sup> (no infection of birds, thus no plots).

**Table S17a (CFU). Calculated numeric values for scenario when the pen is contaminated with  $10^5$  CFU ( $10^5$  CFU in 5.38 kg/litter/m<sup>2</sup>; i.e. 1.27 log<sub>10</sub>/g litter) at the beginning of the fattening period (day 1). Setting: 90 negative birds, Ross 308, feeding duration 36 days, stocking density 39 kg/m<sup>2</sup>, 1000 g litter/m<sup>2</sup>**

| day | prevalence<br>in % | cfu/sqm       | cfu/g manure    | cfu in intestine | cfu/g feces | cfu ingested per<br>animal |
|-----|--------------------|---------------|-----------------|------------------|-------------|----------------------------|
|     | (mean ± sd)        | (mean ± sd)   | (mean ± sd)     | (mean ± sd)      | (mean ± sd) | (mean ± sd)                |
| 1   | 0 ± 0              | 9.3e3 ± 0e3   | 8 ± 0           | 0e0 ± 0          | 0e0 ± 0     | 0e0 ± 0                    |
| 2   | 0 ± 0              | 4.6e3 ± 0e3   | 3.5 ± 0         | 0e0 ± 0          | 0e0 ± 0     | 0e0 ± 0                    |
| 3   | 0 ± 0              | 2.3e3 ± 0e3   | 1.4 ± 0         | 0e0 ± 0          | 0e0 ± 0     | 0e0 ± 0                    |
| 4   | 0 ± 0              | 1.2e3 ± 0e3   | 5.4e-1 ± 0e-1   | 0e0 ± 0          | 0e0 ± 0     | 0e0 ± 0                    |
| 5   | 0 ± 0              | 5.8e2 ± 0e2   | 2.1e-1 ± 0e-1   | 0e0 ± 0          | 0e0 ± 0     | 0e0 ± 0                    |
| 6   | 0 ± 0              | 2.9e2 ± 0e2   | 9e-2 ± 0e-2     | 0e0 ± 0          | 0e0 ± 0     | 0e0 ± 0                    |
| 7   | 0 ± 0              | 1.5e2 ± 0e2   | 3.6e-2 ± 0e-2   | 0e0 ± 0          | 0e0 ± 0     | 0e0 ± 0                    |
| 8   | 0 ± 0              | 7.3e1 ± 0e1   | 1.5e-2 ± 0e-2   | 0e0 ± 0          | 0e0 ± 0     | 0e0 ± 0                    |
| 9   | 0 ± 0              | 3.6e1 ± 0e1   | 6.3e-3 ± 0e-3   | 0e0 ± 0          | 0e0 ± 0     | 0e0 ± 0                    |
| 10  | 0 ± 0              | 1.8e1 ± 0e1   | 2.6e-3 ± 0e-3   | 0e0 ± 0          | 0e0 ± 0     | 0e0 ± 0                    |
| 11  | 0 ± 0              | 9.1 ± 0       | 1.1e-3 ± 0e-3   | 0e0 ± 0          | 0e0 ± 0     | 0e0 ± 0                    |
| 12  | 0 ± 0              | 4.5 ± 0       | 4.7e-4 ± 0e-4   | 0e0 ± 0          | 0e0 ± 0     | 0e0 ± 0                    |
| 13  | 0 ± 0              | 2.3 ± 0       | 2e-4 ± 0e-4     | 0e0 ± 0          | 0e0 ± 0     | 0e0 ± 0                    |
| 14  | 0 ± 0              | 1.1 ± 0       | 8.9e-5 ± 0e-5   | 0e0 ± 0          | 0e0 ± 0     | 0e0 ± 0                    |
| 15  | 0 ± 0              | 5.7e-1 ± 0e-1 | 3.9e-5 ± 0e-5   | 0e0 ± 0          | 0e0 ± 0     | 0e0 ± 0                    |
| 16  | 0 ± 0              | 2.8e-1 ± 0e-1 | 1.7e-5 ± 0e-5   | 0e0 ± 0          | 0e0 ± 0     | 0e0 ± 0                    |
| 17  | 0 ± 0              | 1.4e-1 ± 0e-1 | 7.7e-6 ± 0e-6   | 0e0 ± 0          | 0e0 ± 0     | 0e0 ± 0                    |
| 18  | 0 ± 0              | 7.1e-2 ± 0e-2 | 3.4e-6 ± 0e-6   | 0e0 ± 0          | 0e0 ± 0     | 0e0 ± 0                    |
| 19  | 0 ± 0              | 3.5e-2 ± 0e-2 | 1.5e-6 ± 0e-6   | 0e0 ± 0          | 0e0 ± 0     | 0e0 ± 0                    |
| 20  | 0 ± 0              | 1.8e-2 ± 0e-2 | 7e-7 ± 0e-7     | 0e0 ± 0          | 0e0 ± 0     | 0e0 ± 0                    |
| 21  | 0 ± 0              | 8.9e-3 ± 0e-3 | 3.2e-7 ± 0e-7   | 0e0 ± 0          | 0e0 ± 0     | 0e0 ± 0                    |
| 22  | 0 ± 0              | 4.4e-3 ± 0e-3 | 1.5e-7 ± 0e-7   | 0e0 ± 0          | 0e0 ± 0     | 0e0 ± 0                    |
| 23  | 0 ± 0              | 2.2e-3 ± 0e-3 | 6.7e-8 ± 0e-8   | 0e0 ± 0          | 0e0 ± 0     | 0e0 ± 0                    |
| 24  | 0 ± 0              | 1.1e-3 ± 0e-3 | 3.1e-8 ± 0e-8   | 0e0 ± 0          | 0e0 ± 0     | 0e0 ± 0                    |
| 25  | 0 ± 0              | 5.5e-4 ± 0e-4 | 1.4e-8 ± 0e-8   | 0e0 ± 0          | 0e0 ± 0     | 0e0 ± 0                    |
| 26  | 0 ± 0              | 2.8e-4 ± 0e-4 | 6.5e-9 ± 0e-9   | 0e0 ± 0          | 0e0 ± 0     | 0e0 ± 0                    |
| 27  | 0 ± 0              | 1.4e-4 ± 0e-4 | 3e-9 ± 0e-9     | 0e0 ± 0          | 0e0 ± 0     | 0e0 ± 0                    |
| 28  | 0 ± 0              | 6.9e-5 ± 0e-5 | 1.4e-9 ± 0e-9   | 0e0 ± 0          | 0e0 ± 0     | 0e0 ± 0                    |
| 29  | 0 ± 0              | 3.5e-5 ± 0e-5 | 6.5e-10 ± 0e-10 | 0e0 ± 0          | 0e0 ± 0     | 0e0 ± 0                    |
| 30  | 0 ± 0              | 1.7e-5 ± 0e-5 | 3e-10 ± 0e-10   | 0e0 ± 0          | 0e0 ± 0     | 0e0 ± 0                    |
| 31  | 0 ± 0              | 8.7e-6 ± 0e-6 | 1.4e-10 ± 0e-10 | 0e0 ± 0          | 0e0 ± 0     | 0e0 ± 0                    |
| 32  | 0 ± 0              | 4.3e-6 ± 0e-6 | 6.6e-11 ± 0e-11 | 0e0 ± 0          | 0e0 ± 0     | 0e0 ± 0                    |
| 33  | 0 ± 0              | 2.2e-6 ± 0e-6 | 3.1e-11 ± 0e-11 | 0e0 ± 0          | 0e0 ± 0     | 0e0 ± 0                    |
| 34  | 0 ± 0              | 1.1e-6 ± 0e-6 | 1.5e-11 ± 0e-11 | 0e0 ± 0          | 0e0 ± 0     | 0e0 ± 0                    |
| 35  | 0 ± 0              | 5.4e-7 ± 0e-7 | 6.9e-12 ± 0e-12 | 0e0 ± 0          | 0e0 ± 0     | 0e0 ± 0                    |
| 36  | 0 ± 0              | 2.7e-7 ± 0e-7 | 3.2e-12 ± 0e-12 | 0e0 ± 0          | 0e0 ± 0     | 0e0 ± 0                    |
| 37  | 0 ± 0              | 1.4e-7 ± 0e-7 | 1.5e-12 ± 0e-12 | 0e0 ± 0          | 0e0 ± 0     | 0e0 ± 0                    |

The average of the prevalence, the CFU-values per square meter (cfu/sqm) and per gram manure are calculated over all iterations. The CFU values in the intestine as well as the excreted and ingested quantities are obtained by calculating the average over all animals in one iteration at first and then over all iterations.

**Table S17b (log<sub>10</sub> CFU). Calculated numeric values for scenario when the pen is contaminated with 10<sup>5</sup> CFU (10<sup>5</sup> CFU in 5.38 kg/litter/m<sup>2</sup>; i.e. 1.27 log<sub>10</sub>/g litter) at the beginning of the fattening period (day 1). Setting: 90 negative birds, Ross 308, feeding duration 36 days, stocking density 39 kg/m<sup>2</sup>, 1000 g litter/m<sup>2</sup>**

| day | prevalence in % | cfu/sqm           | cfu/g manure      | cfu in intestine  | cfu/g feces       | cfu ingested per animal |
|-----|-----------------|-------------------|-------------------|-------------------|-------------------|-------------------------|
|     | (% mean ± sd)   | (log10 mean ± sd) | (log10 mean ± sd) | (log10 mean ± sd) | (log10 mean ± sd) | (log10 mean ± sd)       |
| 1   | 0 ± 0           | 3.97 ± -Inf       | 0.9 ± -Inf        | -Inf ± -Inf       | -Inf ± -Inf       | -Inf ± 0                |
| 2   | 0 ± 0           | 3.67 ± -Inf       | 0.54 ± -Inf       | -Inf ± -Inf       | -Inf ± -Inf       | -Inf ± 0                |
| 3   | 0 ± 0           | 3.37 ± -Inf       | 0.15 ± -Inf       | -Inf ± -Inf       | -Inf ± -Inf       | -Inf ± 0                |
| 4   | 0 ± 0           | 3.06 ± -Inf       | -0.27 ± -Inf      | -Inf ± -Inf       | -Inf ± -Inf       | -Inf ± 0                |
| 5   | 0 ± 0           | 2.76 ± -Inf       | -0.68 ± -Inf      | -Inf ± -Inf       | -Inf ± -Inf       | -Inf ± 0                |
| 6   | 0 ± 0           | 2.46 ± -Inf       | -1.05 ± -Inf      | -Inf ± -Inf       | -Inf ± -Inf       | -Inf ± 0                |
| 7   | 0 ± 0           | 2.16 ± -Inf       | -1.44 ± -Inf      | -Inf ± -Inf       | -Inf ± -Inf       | -Inf ± 0                |
| 8   | 0 ± 0           | 1.86 ± -Inf       | -1.82 ± -Inf      | -Inf ± -Inf       | -Inf ± -Inf       | -Inf ± 0                |
| 9   | 0 ± 0           | 1.56 ± -Inf       | -2.2 ± -Inf       | -Inf ± -Inf       | -Inf ± -Inf       | -Inf ± 0                |
| 10  | 0 ± 0           | 1.26 ± -Inf       | -2.58 ± -Inf      | -Inf ± -Inf       | -Inf ± -Inf       | -Inf ± 0                |
| 11  | 0 ± 0           | 0.96 ± -Inf       | -2.95 ± -Inf      | -Inf ± -Inf       | -Inf ± -Inf       | -Inf ± 0                |
| 12  | 0 ± 0           | 0.66 ± -Inf       | -3.32 ± -Inf      | -Inf ± -Inf       | -Inf ± -Inf       | -Inf ± 0                |
| 13  | 0 ± 0           | 0.36 ± -Inf       | -3.69 ± -Inf      | -Inf ± -Inf       | -Inf ± -Inf       | -Inf ± 0                |
| 14  | 0 ± 0           | 0.05 ± -Inf       | -4.05 ± -Inf      | -Inf ± -Inf       | -Inf ± -Inf       | -Inf ± 0                |
| 15  | 0 ± 0           | -0.25 ± -Inf      | -4.41 ± -Inf      | -Inf ± -Inf       | -Inf ± -Inf       | -Inf ± 0                |
| 16  | 0 ± 0           | -0.55 ± -Inf      | -4.76 ± -Inf      | -Inf ± -Inf       | -Inf ± -Inf       | -Inf ± 0                |
| 17  | 0 ± 0           | -0.85 ± -Inf      | -5.11 ± -Inf      | -Inf ± -Inf       | -Inf ± -Inf       | -Inf ± 0                |
| 18  | 0 ± 0           | -1.15 ± -Inf      | -5.46 ± -Inf      | -Inf ± -Inf       | -Inf ± -Inf       | -Inf ± 0                |
| 19  | 0 ± 0           | -1.45 ± -Inf      | -5.81 ± -Inf      | -Inf ± -Inf       | -Inf ± -Inf       | -Inf ± 0                |
| 20  | 0 ± 0           | -1.75 ± -Inf      | -6.15 ± -Inf      | -Inf ± -Inf       | -Inf ± -Inf       | -Inf ± 0                |
| 21  | 0 ± 0           | -2.05 ± -Inf      | -6.5 ± -Inf       | -Inf ± -Inf       | -Inf ± -Inf       | -Inf ± 0                |
| 22  | 0 ± 0           | -2.35 ± -Inf      | -6.84 ± -Inf      | -Inf ± -Inf       | -Inf ± -Inf       | -Inf ± 0                |
| 23  | 0 ± 0           | -2.65 ± -Inf      | -7.18 ± -Inf      | -Inf ± -Inf       | -Inf ± -Inf       | -Inf ± 0                |
| 24  | 0 ± 0           | -2.96 ± -Inf      | -7.52 ± -Inf      | -Inf ± -Inf       | -Inf ± -Inf       | -Inf ± 0                |
| 25  | 0 ± 0           | -3.26 ± -Inf      | -7.85 ± -Inf      | -Inf ± -Inf       | -Inf ± -Inf       | -Inf ± 0                |
| 26  | 0 ± 0           | -3.56 ± -Inf      | -8.19 ± -Inf      | -Inf ± -Inf       | -Inf ± -Inf       | -Inf ± 0                |
| 27  | 0 ± 0           | -3.86 ± -Inf      | -8.52 ± -Inf      | -Inf ± -Inf       | -Inf ± -Inf       | -Inf ± 0                |
| 28  | 0 ± 0           | -4.16 ± -Inf      | -8.86 ± -Inf      | -Inf ± -Inf       | -Inf ± -Inf       | -Inf ± 0                |
| 29  | 0 ± 0           | -4.46 ± -Inf      | -9.19 ± -Inf      | -Inf ± -Inf       | -Inf ± -Inf       | -Inf ± 0                |
| 30  | 0 ± 0           | -4.76 ± -Inf      | -9.52 ± -Inf      | -Inf ± -Inf       | -Inf ± -Inf       | -Inf ± 0                |
| 31  | 0 ± 0           | -5.06 ± -Inf      | -9.85 ± -Inf      | -Inf ± -Inf       | -Inf ± -Inf       | -Inf ± 0                |
| 32  | 0 ± 0           | -5.36 ± -Inf      | -10.18 ± -Inf     | -Inf ± -Inf       | -Inf ± -Inf       | -Inf ± 0                |
| 33  | 0 ± 0           | -5.66 ± -Inf      | -10.51 ± -Inf     | -Inf ± -Inf       | -Inf ± -Inf       | -Inf ± 0                |
| 34  | 0 ± 0           | -5.97 ± -Inf      | -10.84 ± -Inf     | -Inf ± -Inf       | -Inf ± -Inf       | -Inf ± 0                |
| 35  | 0 ± 0           | -6.27 ± -Inf      | -11.16 ± -Inf     | -Inf ± -Inf       | -Inf ± -Inf       | -Inf ± 0                |
| 36  | 0 ± 0           | -6.57 ± -Inf      | -11.49 ± -Inf     | -Inf ± -Inf       | -Inf ± -Inf       | -Inf ± 0                |
| 37  | 0 ± 0           | -6.87 ± -Inf      | -11.82 ± -Inf     | -Inf ± -Inf       | -Inf ± -Inf       | -Inf ± 0                |

The average of the prevalence, the CFU-values per square meter (cfu/sqm) and per gram manure are calculated over all iterations. The CFU values in the intestine as well as the excreted and ingested quantities are obtained by calculating the average over all animals in one iteration at first and then over all iterations. The decadic logarithm of zero or negative values is negative infinite (-Inf).

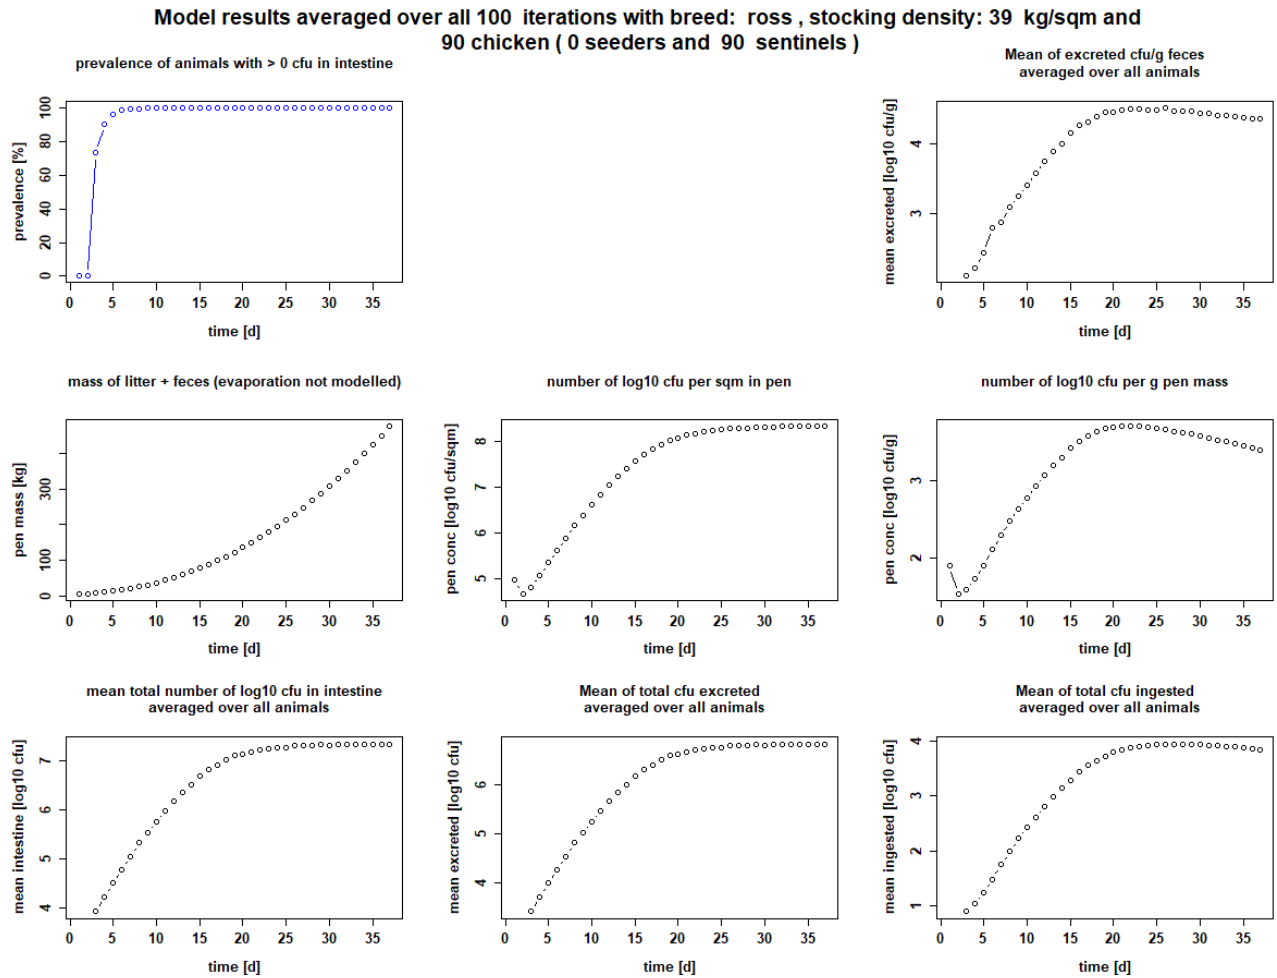

**Figure S18. Calculated infection dynamic for the scenario when the pen is contaminated with  $10^6$  CFU ( $10^6$  CFU in 5.38 kg/litter/m<sup>2</sup>; i.e. 2.27 log<sub>10</sub>/g litter) at the beginning of the fattening period (day 1; reference). Dotplots with results for 90 negative birds, Ross 308, feeding duration 36 days, stocking density 39 kg/m<sup>2</sup>, 1000 g litter/m<sup>2</sup>**

**Table S18a (CFU). Calculated numeric values for scenario when the pen is contaminated with  $10^6$  CFU ( $10^6$  CFU in 5.38 kg/litter/m<sup>2</sup>; i.e. 2.27 log<sub>10</sub>/g litter) at the beginning of the fattening period (day 1; reference). Setting: 90 negative birds, Ross 308, feeding duration 36 days, stocking density 39 kg/m<sup>2</sup>, 1000 g litter/m<sup>2</sup>**

| day | prevalence in % | cfu/sqm       | cfu/g manure  | cfu in intestine | cfu/g feces   | cfu ingested per animal |
|-----|-----------------|---------------|---------------|------------------|---------------|-------------------------|
|     | (mean ± sd)     | (mean ± sd)   | (mean ± sd)   | (mean ± sd)      | (mean ± sd)   | (mean ± sd)             |
| 1   | 0 ± 0           | 9.3e4 ± 0e4   | 8e1 ± 0e1     | 0e0 ± 0          | 0e0 ± 0       | 0e0 ± 0                 |
| 2   | 0 ± 0           | 4.6e4 ± 0e4   | 3.5e1 ± 0e1   | 0e0 ± 0          | 0e0 ± 0       | 0e0 ± 0                 |
| 3   | 73.39 ± 4.87    | 6.6e4 ± 1.2e4 | 4e1 ± 0.7e1   | 8.4e3 ± 2.4e3    | 1.3e2 ± 0.4e2 | 8 ± 0                   |
| 4   | 90.72 ± 3.28    | 1.2e5 ± 0.3e5 | 5.5e1 ± 1.3e1 | 1.7e4 ± 0.5e4    | 1.7e2 ± 0.5e2 | 1.11e1 ± 0.2e1          |
| 5   | 96.74 ± 2.43    | 2.2e5 ± 0.7e5 | 8.1e1 ± 2.6e1 | 3.2e4 ± 1.2e4    | 2.8e2 ± 1.1e2 | 1.79e1 ± 0.4e1          |
| 6   | 98.9 ± 1.38     | 4.2e5 ± 1.7e5 | 1.3e2 ± 0.5e2 | 6.1e4 ± 2.8e4    | 6.4e2 ± 3e2   | 3.11e1 ± 1e1            |
| 7   | 99.79 ± 0.61    | 7.8e5 ± 3.5e5 | 2e2 ± 0.9e2   | 1.1e5 ± 0.5e5    | 7.6e2 ± 3.6e2 | 5.74e1 ± 2.4e1          |
| 8   | 99.94 ± 0.24    | 1.5e6 ± 0.8e6 | 3e2 ± 1.6e2   | 2.1e5 ± 1.3e5    | 1.3e3 ± 0.7e3 | 9.83e1 ± 4.4e1          |
| 9   | 100 ± 0         | 2.5e6 ± 1.5e6 | 4.3e2 ± 2.5e2 | 3.5e5 ± 2.2e5    | 1.8e3 ± 1.2e3 | 1.68e2 ± 0.9e2          |
| 10  | 100 ± 0         | 4.1e6 ± 2.3e6 | 6e2 ± 3.4e2   | 5.8e5 ± 3.3e5    | 2.6e3 ± 1.5e3 | 2.67e2 ± 1.6e2          |
| 11  | 100 ± 0         | 7e6 ± 4.3e6   | 8.5e2 ± 5.3e2 | 9.8e5 ± 6.5e5    | 3.9e3 ± 2.6e3 | 4.11e2 ± 2.3e2          |
| 12  | 100 ± 0         | 1.1e7 ± 0.7e7 | 1.2e3 ± 0.7e3 | 1.6e6 ± 0.9e6    | 5.6e3 ± 3.3e3 | 6.45e2 ± 4e2            |
| 13  | 100 ± 0         | 1.7e7 ± 1.1e7 | 1.6e3 ± 1e3   | 2.3e6 ± 1.6e6    | 7.8e3 ± 5.2e3 | 9.58e2 ± 5.6e2          |
| 14  | 100 ± 0         | 2.5e7 ± 1.5e7 | 2e3 ± 1.2e3   | 3.3e6 ± 2e6      | 10e3 ± 6.1e3  | 1.39e3 ± 0.9e3          |
| 15  | 100 ± 0         | 3.8e7 ± 2.4e7 | 2.6e3 ± 1.6e3 | 5e6 ± 3.4e6      | 1.4e4 ± 0.9e4 | 1.91e3 ± 1.2e3          |
| 16  | 100 ± 0         | 5.3e7 ± 3.1e7 | 3.2e3 ± 1.9e3 | 6.7e6 ± 3.9e6    | 1.8e4 ± 1.1e4 | 2.7e3 ± 1.7e3           |
| 17  | 100 ± 0         | 6.8e7 ± 3.6e7 | 3.7e3 ± 2e3   | 8.3e6 ± 4.4e6    | 2.1e4 ± 1.1e4 | 3.55e3 ± 2.1e3          |
| 18  | 100 ± 0         | 8.7e7 ± 4.1e7 | 4.2e3 ± 2e3   | 1.1e7 ± 0.5e7    | 2.4e4 ± 1.1e4 | 4.4e3 ± 2.3e3           |
| 19  | 100 ± 0         | 1.1e8 ± 0.5e8 | 4.7e3 ± 2e3   | 1.3e7 ± 0.5e7    | 2.8e4 ± 1.2e4 | 5.31e3 ± 2.5e3          |
| 20  | 100 ± 0         | 1.2e8 ± 0.5e8 | 4.8e3 ± 1.8e3 | 1.4e7 ± 0.5e7    | 2.9e4 ± 1.1e4 | 6.32e3 ± 2.7e3          |
| 21  | 100 ± 0         | 1.4e8 ± 0.5e8 | 5e3 ± 1.6e3   | 1.6e7 ± 0.5e7    | 3.1e4 ± 1e4   | 6.89e3 ± 2.6e3          |
| 22  | 100 ± 0         | 1.5e8 ± 0.4e8 | 5e3 ± 1.5e3   | 1.7e7 ± 0.5e7    | 3.1e4 ± 1e4   | 7.56e3 ± 2.5e3          |
| 23  | 100 ± 0         | 1.7e8 ± 0.4e8 | 5e3 ± 1.3e3   | 1.8e7 ± 0.5e7    | 3.2e4 ± 0.9e4 | 8e3 ± 2.3e3             |
| 24  | 100 ± 0         | 1.8e8 ± 0.4e8 | 4.8e3 ± 1.1e3 | 1.8e7 ± 0.5e7    | 3.1e4 ± 0.8e4 | 8.35e3 ± 2.2e3          |
| 25  | 100 ± 0         | 1.8e8 ± 0.4e8 | 4.7e3 ± 1e3   | 1.9e7 ± 0.5e7    | 3.1e4 ± 0.8e4 | 8.45e3 ± 2e3            |
| 26  | 100 ± 0         | 1.9e8 ± 0.4e8 | 4.6e3 ± 0.9e3 | 2e7 ± 0.4e7      | 3.2e4 ± 0.7e4 | 8.53e3 ± 1.9e3          |
| 27  | 100 ± 0         | 2e8 ± 0.4e8   | 4.3e3 ± 0.8e3 | 2e7 ± 0.5e7      | 3e4 ± 0.7e4   | 8.75e3 ± 1.7e3          |
| 28  | 100 ± 0         | 2e8 ± 0.3e8   | 4.1e3 ± 0.7e3 | 2.1e7 ± 0.4e7    | 2.9e4 ± 0.6e4 | 8.64e3 ± 1.7e3          |
| 29  | 100 ± 0         | 2.1e8 ± 0.3e8 | 4e3 ± 0.6e3   | 2.2e7 ± 0.4e7    | 2.9e4 ± 0.6e4 | 8.56e3 ± 1.4e3          |
| 30  | 100 ± 0         | 2.1e8 ± 0.3e8 | 3.7e3 ± 0.6e3 | 2.1e7 ± 0.4e7    | 2.8e4 ± 0.6e4 | 8.54e3 ± 1.4e3          |
| 31  | 100 ± 0         | 2.1e8 ± 0.3e8 | 3.5e3 ± 0.6e3 | 2.2e7 ± 0.4e7    | 2.7e4 ± 0.5e4 | 8.3e3 ± 1.3e3           |
| 32  | 100 ± 0         | 2.2e8 ± 0.3e8 | 3.3e3 ± 0.5e3 | 2.2e7 ± 0.4e7    | 2.6e4 ± 0.4e4 | 8.1e3 ± 1.3e3           |
| 33  | 100 ± 0         | 2.2e8 ± 0.3e8 | 3.1e3 ± 0.4e3 | 2.2e7 ± 0.4e7    | 2.6e4 ± 0.4e4 | 7.87e3 ± 1.1e3          |
| 34  | 100 ± 0         | 2.2e8 ± 0.3e8 | 3e3 ± 0.4e3   | 2.2e7 ± 0.4e7    | 2.5e4 ± 0.4e4 | 7.71e3 ± 1e3            |
| 35  | 100 ± 0         | 2.2e8 ± 0.3e8 | 2.8e3 ± 0.3e3 | 2.2e7 ± 0.4e7    | 2.4e4 ± 0.4e4 | 7.49e3 ± 0.9e3          |
| 36  | 100 ± 0         | 2.2e8 ± 0.3e8 | 2.6e3 ± 0.3e3 | 2.2e7 ± 0.4e7    | 2.3e4 ± 0.5e4 | 7.21e3 ± 0.8e3          |
| 37  | 100 ± 0         | 2.2e8 ± 0.3e8 | 2.5e3 ± 0.3e3 | 2.2e7 ± 0.4e7    | 2.2e4 ± 0.4e4 | 6.93e3 ± 0.8e3          |

The average of the prevalence, the CFU-values per square meter (cfu/sqm) and per gram manure are calculated over all iterations. The CFU values in the intestine as well as the excreted and ingested quantities are obtained by calculating the average over all animals in one iteration at first and then over all iterations.

**Table S18b (log<sub>10</sub> CFU). Calculated numeric values for scenario when the pen is contaminated with 10<sup>6</sup> CFU (10<sup>6</sup> CFU in 5.38 kg/litter/m<sup>2</sup>; i.e. 2.27 log<sub>10</sub>/g litter) at the beginning of the fattening period (day 1; reference). Setting: 90 negative birds, Ross 308, feeding duration 36 days, stocking density 39 kg/m<sup>2</sup>, 1000 g litter/m<sup>2</sup>**

| day | prevalence in % | cfu/sqm           | cfu/g manure      | cfu in intestine  | cfu/g feces       | cfu ingested per animal |
|-----|-----------------|-------------------|-------------------|-------------------|-------------------|-------------------------|
|     | (% mean ± sd)   | (log10 mean ± sd) | (log10 mean ± sd) | (log10 mean ± sd) | (log10 mean ± sd) | (log10 mean ± sd)       |
| 1   | 0 ± 0           | 4.97 ± -Inf       | 1.9 ± -Inf        | -Inf ± -Inf       | -Inf ± -Inf       | -Inf ± 0                |
| 2   | 0 ± 0           | 4.67 ± -Inf       | 1.54 ± -Inf       | -Inf ± -Inf       | -Inf ± -Inf       | -Inf ± 0                |
| 3   | 73.39 ± 4.87    | 4.82 ± 4.07       | 1.6 ± 0.85        | 3.93 ± 3.37       | 2.12 ± 1.56       | 0.9 ± 0                 |
| 4   | 90.72 ± 3.28    | 5.07 ± 4.45       | 1.74 ± 1.11       | 4.23 ± 3.7        | 2.23 ± 1.7        | 1.05 ± 0.33             |
| 5   | 96.74 ± 2.43    | 5.35 ± 4.86       | 1.91 ± 1.42       | 4.51 ± 4.1        | 2.44 ± 2.03       | 1.25 ± 0.64             |
| 6   | 98.9 ± 1.38     | 5.62 ± 5.23       | 2.11 ± 1.72       | 4.79 ± 4.45       | 2.81 ± 2.47       | 1.49 ± 1.01             |
| 7   | 99.79 ± 0.61    | 5.89 ± 5.54       | 2.29 ± 1.94       | 5.06 ± 4.74       | 2.88 ± 2.56       | 1.76 ± 1.37             |
| 8   | 99.94 ± 0.24    | 6.16 ± 5.9        | 2.48 ± 2.21       | 5.33 ± 5.1        | 3.1 ± 2.87        | 1.99 ± 1.65             |
| 9   | 100 ± 0         | 6.39 ± 6.17       | 2.63 ± 2.4        | 5.54 ± 5.34       | 3.26 ± 3.06       | 2.23 ± 1.96             |
| 10  | 100 ± 0         | 6.62 ± 6.37       | 2.78 ± 2.53       | 5.76 ± 5.52       | 3.42 ± 3.17       | 2.43 ± 2.2              |
| 11  | 100 ± 0         | 6.84 ± 6.64       | 2.93 ± 2.73       | 5.99 ± 5.81       | 3.59 ± 3.41       | 2.61 ± 2.37             |
| 12  | 100 ± 0         | 7.05 ± 6.82       | 3.07 ± 2.84       | 6.19 ± 5.96       | 3.75 ± 3.52       | 2.81 ± 2.6              |
| 13  | 100 ± 0         | 7.24 ± 7.04       | 3.2 ± 2.99        | 6.37 ± 6.2        | 3.89 ± 3.72       | 2.98 ± 2.75             |
| 14  | 100 ± 0         | 7.4 ± 7.18        | 3.3 ± 3.08        | 6.52 ± 6.3        | 4 ± 3.79          | 3.14 ± 2.94             |
| 15  | 100 ± 0         | 7.58 ± 7.38       | 3.42 ± 3.22       | 6.7 ± 6.53        | 4.15 ± 3.98       | 3.28 ± 3.06             |
| 16  | 100 ± 0         | 7.72 ± 7.49       | 3.51 ± 3.28       | 6.83 ± 6.59       | 4.26 ± 4.03       | 3.43 ± 3.23             |
| 17  | 100 ± 0         | 7.83 ± 7.56       | 3.57 ± 3.29       | 6.92 ± 6.64       | 4.31 ± 4.03       | 3.55 ± 3.32             |
| 18  | 100 ± 0         | 7.94 ± 7.61       | 3.62 ± 3.3        | 7.02 ± 6.69       | 4.38 ± 4.05       | 3.64 ± 3.37             |
| 19  | 100 ± 0         | 8.03 ± 7.66       | 3.67 ± 3.3        | 7.11 ± 6.74       | 4.45 ± 4.08       | 3.73 ± 3.4              |
| 20  | 100 ± 0         | 8.09 ± 7.66       | 3.68 ± 3.26       | 7.13 ± 6.7        | 4.46 ± 4.02       | 3.8 ± 3.43              |
| 21  | 100 ± 0         | 8.14 ± 7.66       | 3.7 ± 3.21        | 7.19 ± 6.7        | 4.49 ± 4          | 3.84 ± 3.41             |
| 22  | 100 ± 0         | 8.18 ± 7.65       | 3.7 ± 3.17        | 7.22 ± 6.71       | 4.5 ± 3.99        | 3.88 ± 3.39             |
| 23  | 100 ± 0         | 8.22 ± 7.64       | 3.7 ± 3.11        | 7.25 ± 6.69       | 4.5 ± 3.94        | 3.9 ± 3.37              |
| 24  | 100 ± 0         | 8.24 ± 7.61       | 3.68 ± 3.05       | 7.27 ± 6.67       | 4.49 ± 3.89       | 3.92 ± 3.34             |
| 25  | 100 ± 0         | 8.26 ± 7.61       | 3.67 ± 3.01       | 7.28 ± 6.68       | 4.48 ± 3.88       | 3.93 ± 3.29             |
| 26  | 100 ± 0         | 8.29 ± 7.57       | 3.66 ± 2.94       | 7.31 ± 6.65       | 4.51 ± 3.85       | 3.93 ± 3.27             |
| 27  | 100 ± 0         | 8.3 ± 7.58        | 3.64 ± 2.92       | 7.31 ± 6.68       | 4.47 ± 3.84       | 3.94 ± 3.23             |
| 28  | 100 ± 0         | 8.31 ± 7.52       | 3.61 ± 2.82       | 7.32 ± 6.62       | 4.46 ± 3.77       | 3.94 ± 3.22             |
| 29  | 100 ± 0         | 8.33 ± 7.53       | 3.6 ± 2.8         | 7.34 ± 6.64       | 4.46 ± 3.76       | 3.93 ± 3.14             |
| 30  | 100 ± 0         | 8.33 ± 7.52       | 3.57 ± 2.77       | 7.33 ± 6.64       | 4.44 ± 3.76       | 3.93 ± 3.13             |
| 31  | 100 ± 0         | 8.33 ± 7.53       | 3.54 ± 2.75       | 7.34 ± 6.64       | 4.43 ± 3.73       | 3.92 ± 3.12             |
| 32  | 100 ± 0         | 8.34 ± 7.47       | 3.52 ± 2.66       | 7.34 ± 6.57       | 4.41 ± 3.65       | 3.91 ± 3.11             |
| 33  | 100 ± 0         | 8.34 ± 7.46       | 3.5 ± 2.61        | 7.35 ± 6.57       | 4.41 ± 3.63       | 3.9 ± 3.03              |
| 34  | 100 ± 0         | 8.34 ± 7.44       | 3.47 ± 2.57       | 7.34 ± 6.58       | 4.4 ± 3.64        | 3.89 ± 3                |
| 35  | 100 ± 0         | 8.34 ± 7.41       | 3.44 ± 2.51       | 7.34 ± 6.61       | 4.37 ± 3.65       | 3.87 ± 2.97             |
| 36  | 100 ± 0         | 8.34 ± 7.42       | 3.42 ± 2.49       | 7.34 ± 6.63       | 4.36 ± 3.66       | 3.86 ± 2.93             |
| 37  | 100 ± 0         | 8.34 ± 7.4        | 3.39 ± 2.45       | 7.34 ± 6.57       | 4.35 ± 3.58       | 3.84 ± 2.92             |

The average of the prevalence, the CFU-values per square meter (cfu/sqm) and per gram manure are calculated over all iterations. The CFU values in the intestine as well as the excreted and ingested quantities are obtained by calculating the average over all animals in one iteration at first and then over all iterations. The decadic logarithm of zero or negative values is negative infinite (-Inf).

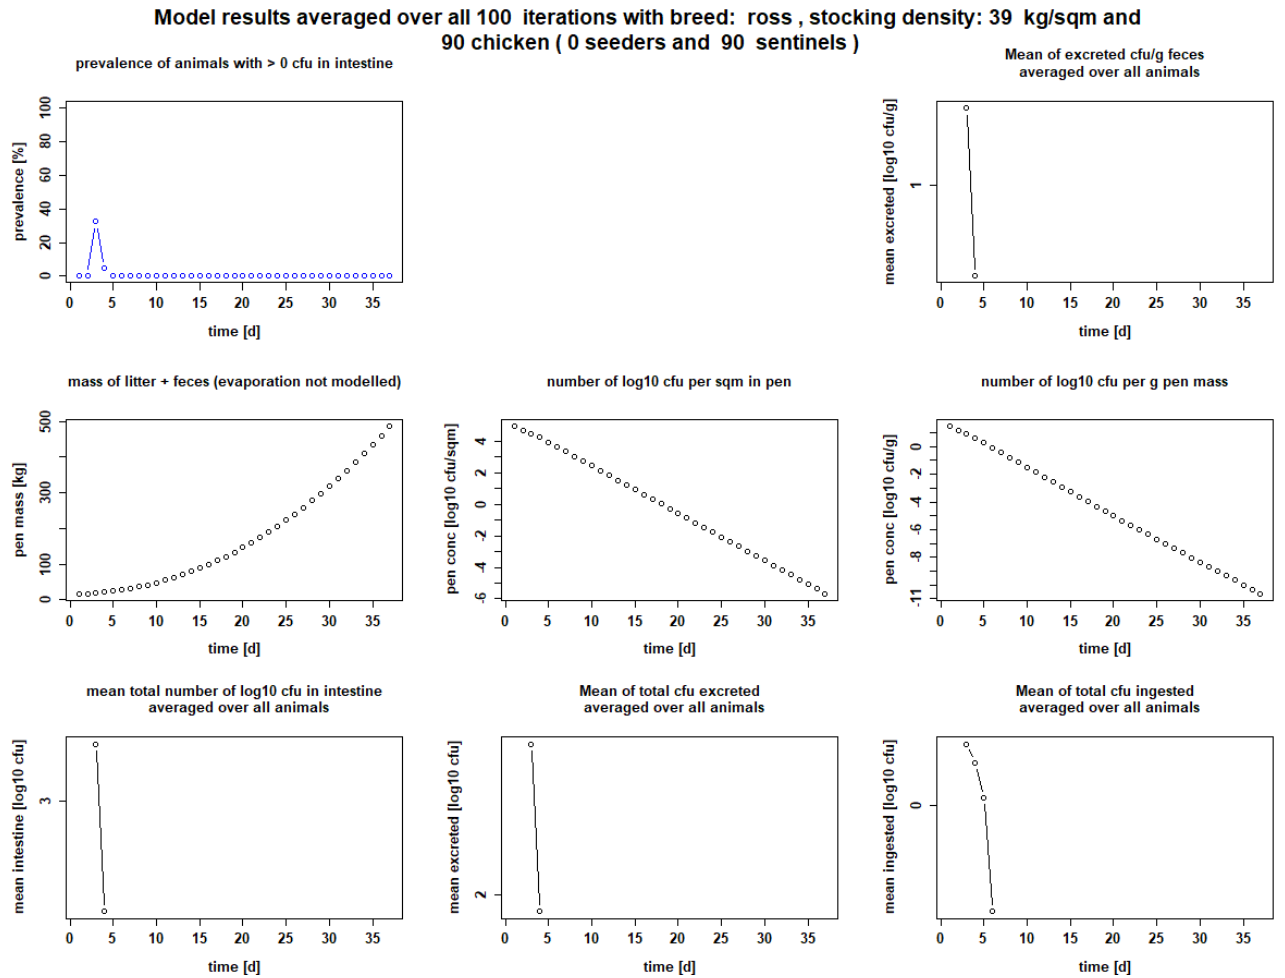

**Figure S19.** Calculated infection dynamic for the scenario when the pen is contaminated with  $10^6$  CFU at the beginning of the fattening period, measure 3000 g litter/m<sup>2</sup>. Dotplots with results for 90 negative birds, Ross 308, feeding duration 36 days, stocking density 39 kg/m<sup>2</sup>, 3000 g litter/m<sup>2</sup>

**Table S19a (CFU). Calculated numeric values for scenario when the pen is contaminated with  $10^6$  CFU at the beginning of the fattening period, measure 3000 g litter/m<sup>2</sup>. Setting: 90 negative birds, Ross 308, feeding duration 36 days, stocking density 39 kg/m<sup>2</sup>, 3000 g litter/m<sup>2</sup>**

| day | prevalence in %  | cfu/sqm             | cfu/g manure          | cfu in intestine  | cfu/g feces     | cfu ingested per animal |
|-----|------------------|---------------------|-----------------------|-------------------|-----------------|-------------------------|
|     | (mean $\pm$ sd)  | (mean $\pm$ sd)     | (mean $\pm$ sd)       | (mean $\pm$ sd)   | (mean $\pm$ sd) | (mean $\pm$ sd)         |
| 1   | 0 $\pm$ 0        | 9.3e4 $\pm$ 0e4     | 2.9e1 $\pm$ 0e1       | 0e0 $\pm$ 0       | 0e0 $\pm$ 0     | 0e0 $\pm$ 0             |
| 2   | 0 $\pm$ 0        | 4.6e4 $\pm$ 0e4     | 1.4e1 $\pm$ 0e1       | 0e0 $\pm$ 0       | 0e0 $\pm$ 0     | 0e0 $\pm$ 0             |
| 3   | 32.46 $\pm$ 4.42 | 3.3e4 $\pm$ 0.4e4   | 9 $\pm$ 1.2           | 2e3 $\pm$ 0.9e3   | 3e1 $\pm$ 1.4e1 | 3 $\pm$ 0               |
| 4   | 4.77 $\pm$ 11.57 | 1.8e4 $\pm$ 0.5e4   | 4.3 $\pm$ 1.2         | 2.7e2 $\pm$ 6.8e2 | 2.7 $\pm$ 6.8   | 2.15 $\pm$ 0.4          |
| 5   | 0 $\pm$ 0        | 8.9e3 $\pm$ 2.6e3   | 1.9 $\pm$ 0.5         | 0e0 $\pm$ 0       | 0e0 $\pm$ 0     | 1.15 $\pm$ 0.4          |
| 6   | 0 $\pm$ 0        | 4.5e3 $\pm$ 1.3e3   | 8.6e-1 $\pm$ 2.5e-1   | 0e0 $\pm$ 0       | 0e0 $\pm$ 0     | 1.5e-1 $\pm$ 3.6e-1     |
| 7   | 0 $\pm$ 0        | 2.2e3 $\pm$ 0.7e3   | 3.7e-1 $\pm$ 1.1e-1   | 0e0 $\pm$ 0       | 0e0 $\pm$ 0     | 0e0 $\pm$ 0             |
| 8   | 0 $\pm$ 0        | 1.1e3 $\pm$ 0.3e3   | 1.6e-1 $\pm$ 0.5e-1   | 0e0 $\pm$ 0       | 0e0 $\pm$ 0     | 0e0 $\pm$ 0             |
| 9   | 0 $\pm$ 0        | 5.6e2 $\pm$ 1.6e2   | 7.2e-2 $\pm$ 2.1e-2   | 0e0 $\pm$ 0       | 0e0 $\pm$ 0     | 0e0 $\pm$ 0             |
| 10  | 0 $\pm$ 0        | 2.8e2 $\pm$ 0.8e2   | 3.1e-2 $\pm$ 0.9e-2   | 0e0 $\pm$ 0       | 0e0 $\pm$ 0     | 0e0 $\pm$ 0             |
| 11  | 0 $\pm$ 0        | 1.4e2 $\pm$ 0.4e2   | 1.4e-2 $\pm$ 0.4e-2   | 0e0 $\pm$ 0       | 0e0 $\pm$ 0     | 0e0 $\pm$ 0             |
| 12  | 0 $\pm$ 0        | 7e1 $\pm$ 2e1       | 6e-3 $\pm$ 1.8e-3     | 0e0 $\pm$ 0       | 0e0 $\pm$ 0     | 0e0 $\pm$ 0             |
| 13  | 0 $\pm$ 0        | 3.5e1 $\pm$ 1e1     | 2.7e-3 $\pm$ 0.8e-3   | 0e0 $\pm$ 0       | 0e0 $\pm$ 0     | 0e0 $\pm$ 0             |
| 14  | 0 $\pm$ 0        | 1.7e1 $\pm$ 0.5e1   | 1.2e-3 $\pm$ 0.3e-3   | 0e0 $\pm$ 0       | 0e0 $\pm$ 0     | 0e0 $\pm$ 0             |
| 15  | 0 $\pm$ 0        | 8.7 $\pm$ 2.5       | 5.3e-4 $\pm$ 1.5e-4   | 0e0 $\pm$ 0       | 0e0 $\pm$ 0     | 0e0 $\pm$ 0             |
| 16  | 0 $\pm$ 0        | 4.4 $\pm$ 1.3       | 2.4e-4 $\pm$ 0.7e-4   | 0e0 $\pm$ 0       | 0e0 $\pm$ 0     | 0e0 $\pm$ 0             |
| 17  | 0 $\pm$ 0        | 2.2 $\pm$ 0.6       | 1.1e-4 $\pm$ 0.3e-4   | 0e0 $\pm$ 0       | 0e0 $\pm$ 0     | 0e0 $\pm$ 0             |
| 18  | 0 $\pm$ 0        | 1.1 $\pm$ 0.3       | 4.8e-5 $\pm$ 1.4e-5   | 0e0 $\pm$ 0       | 0e0 $\pm$ 0     | 0e0 $\pm$ 0             |
| 19  | 0 $\pm$ 0        | 5.5e-1 $\pm$ 1.6e-1 | 2.2e-5 $\pm$ 0.6e-5   | 0e0 $\pm$ 0       | 0e0 $\pm$ 0     | 0e0 $\pm$ 0             |
| 20  | 0 $\pm$ 0        | 2.7e-1 $\pm$ 0.8e-1 | 1e-5 $\pm$ 0.3e-5     | 0e0 $\pm$ 0       | 0e0 $\pm$ 0     | 0e0 $\pm$ 0             |
| 21  | 0 $\pm$ 0        | 1.4e-1 $\pm$ 0.4e-1 | 4.6e-6 $\pm$ 1.3e-6   | 0e0 $\pm$ 0       | 0e0 $\pm$ 0     | 0e0 $\pm$ 0             |
| 22  | 0 $\pm$ 0        | 6.8e-2 $\pm$ 2e-2   | 2.1e-6 $\pm$ 0.6e-6   | 0e0 $\pm$ 0       | 0e0 $\pm$ 0     | 0e0 $\pm$ 0             |
| 23  | 0 $\pm$ 0        | 3.4e-2 $\pm$ 1e-2   | 9.7e-7 $\pm$ 2.8e-7   | 0e0 $\pm$ 0       | 0e0 $\pm$ 0     | 0e0 $\pm$ 0             |
| 24  | 0 $\pm$ 0        | 1.7e-2 $\pm$ 0.5e-2 | 4.5e-7 $\pm$ 1.3e-7   | 0e0 $\pm$ 0       | 0e0 $\pm$ 0     | 0e0 $\pm$ 0             |
| 25  | 0 $\pm$ 0        | 8.5e-3 $\pm$ 2.5e-3 | 2.1e-7 $\pm$ 0.6e-7   | 0e0 $\pm$ 0       | 0e0 $\pm$ 0     | 0e0 $\pm$ 0             |
| 26  | 0 $\pm$ 0        | 4.3e-3 $\pm$ 1.2e-3 | 9.6e-8 $\pm$ 2.8e-8   | 0e0 $\pm$ 0       | 0e0 $\pm$ 0     | 0e0 $\pm$ 0             |
| 27  | 0 $\pm$ 0        | 2.1e-3 $\pm$ 0.6e-3 | 4.4e-8 $\pm$ 1.3e-8   | 0e0 $\pm$ 0       | 0e0 $\pm$ 0     | 0e0 $\pm$ 0             |
| 28  | 0 $\pm$ 0        | 1.1e-3 $\pm$ 0.3e-3 | 2.1e-8 $\pm$ 0.6e-8   | 0e0 $\pm$ 0       | 0e0 $\pm$ 0     | 0e0 $\pm$ 0             |
| 29  | 0 $\pm$ 0        | 5.3e-4 $\pm$ 1.5e-4 | 9.6e-9 $\pm$ 2.8e-9   | 0e0 $\pm$ 0       | 0e0 $\pm$ 0     | 0e0 $\pm$ 0             |
| 30  | 0 $\pm$ 0        | 2.7e-4 $\pm$ 0.8e-4 | 4.5e-9 $\pm$ 1.3e-9   | 0e0 $\pm$ 0       | 0e0 $\pm$ 0     | 0e0 $\pm$ 0             |
| 31  | 0 $\pm$ 0        | 1.3e-4 $\pm$ 0.4e-4 | 2.1e-9 $\pm$ 0.6e-9   | 0e0 $\pm$ 0       | 0e0 $\pm$ 0     | 0e0 $\pm$ 0             |
| 32  | 0 $\pm$ 0        | 6.7e-5 $\pm$ 1.9e-5 | 9.9e-10 $\pm$ 2.9e-10 | 0e0 $\pm$ 0       | 0e0 $\pm$ 0     | 0e0 $\pm$ 0             |
| 33  | 0 $\pm$ 0        | 3.3e-5 $\pm$ 1e-5   | 4.6e-10 $\pm$ 1.3e-10 | 0e0 $\pm$ 0       | 0e0 $\pm$ 0     | 0e0 $\pm$ 0             |
| 34  | 0 $\pm$ 0        | 1.7e-5 $\pm$ 0.5e-5 | 2.2e-10 $\pm$ 0.6e-10 | 0e0 $\pm$ 0       | 0e0 $\pm$ 0     | 0e0 $\pm$ 0             |
| 35  | 0 $\pm$ 0        | 8.3e-6 $\pm$ 2.4e-6 | 1e-10 $\pm$ 0.3e-10   | 0e0 $\pm$ 0       | 0e0 $\pm$ 0     | 0e0 $\pm$ 0             |
| 36  | 0 $\pm$ 0        | 4.2e-6 $\pm$ 1.2e-6 | 4.9e-11 $\pm$ 1.4e-11 | 0e0 $\pm$ 0       | 0e0 $\pm$ 0     | 0e0 $\pm$ 0             |
| 37  | 0 $\pm$ 0        | 2.1e-6 $\pm$ 0.6e-6 | 2.3e-11 $\pm$ 0.7e-11 | 0e0 $\pm$ 0       | 0e0 $\pm$ 0     | 0e0 $\pm$ 0             |

The average of the prevalence, the CFU-values per square meter (cfu/sqm) and per gram manure are calculated over all iterations. The CFU values in the intestine as well as the excreted and ingested quantities are obtained by calculating the average over all animals in one iteration at first and then over all iterations.



**Table S19b (log<sub>10</sub> CFU). ). Calculated numeric values for scenario when the pen is contaminated with 10<sup>6</sup> CFU at the beginning of the fattening period, measure 3000 g litter/m<sup>2</sup>. Setting: 90 negative birds, Ross 308, feeding duration 36 days, stocking density 39 kg/m<sup>2</sup>, 3000 g litter/m<sup>2</sup>**

| day | prevalence in % | cfu/sqm           | cfu/g manure      | cfu in intestine  | cfu/g feces       | cfu ingested per animal |
|-----|-----------------|-------------------|-------------------|-------------------|-------------------|-------------------------|
|     | (% mean ± sd)   | (log10 mean ± sd) | (log10 mean ± sd) | (log10 mean ± sd) | (log10 mean ± sd) | (log10 mean ± sd)       |
| 1   | 0 ± 0           | 4.97 ± -Inf       | 1.47 ± -Inf       | -Inf ± -Inf       | -Inf ± -Inf       | -Inf ± 0                |
| 2   | 0 ± 0           | 4.67 ± -Inf       | 1.14 ± -Inf       | -Inf ± -Inf       | -Inf ± -Inf       | -Inf ± 0                |
| 3   | 32.46 ± 4.42    | 4.52 ± 3.65       | 0.96 ± 0.08       | 3.29 ± 2.95       | 1.48 ± 1.14       | 0.48 ± 0                |
| 4   | 4.77 ± 11.57    | 4.25 ± 3.72       | 0.63 ± 0.1        | 2.44 ± 2.84       | 0.43 ± 0.83       | 0.33 ± -0.45            |
| 5   | 0 ± 0           | 3.95 ± 3.41       | 0.27 ± -0.26      | -Inf ± -Inf       | -Inf ± -Inf       | 0.06 ± -0.45            |
| 6   | 0 ± 0           | 3.65 ± 3.11       | -0.07 ± -0.6      | -Inf ± -Inf       | -Inf ± -Inf       | -0.82 ± -0.45           |
| 7   | 0 ± 0           | 3.35 ± 2.81       | -0.43 ± -0.96     | -Inf ± -Inf       | -Inf ± -Inf       | -Inf ± 0                |
| 8   | 0 ± 0           | 3.05 ± 2.51       | -0.79 ± -1.32     | -Inf ± -Inf       | -Inf ± -Inf       | -Inf ± 0                |
| 9   | 0 ± 0           | 2.75 ± 2.21       | -1.14 ± -1.68     | -Inf ± -Inf       | -Inf ± -Inf       | -Inf ± 0                |
| 10  | 0 ± 0           | 2.45 ± 1.91       | -1.5 ± -2.04      | -Inf ± -Inf       | -Inf ± -Inf       | -Inf ± 0                |
| 11  | 0 ± 0           | 2.15 ± 1.61       | -1.86 ± -2.4      | -Inf ± -Inf       | -Inf ± -Inf       | -Inf ± 0                |
| 12  | 0 ± 0           | 1.84 ± 1.31       | -2.22 ± -2.76     | -Inf ± -Inf       | -Inf ± -Inf       | -Inf ± 0                |
| 13  | 0 ± 0           | 1.54 ± 1.01       | -2.57 ± -3.11     | -Inf ± -Inf       | -Inf ± -Inf       | -Inf ± 0                |
| 14  | 0 ± 0           | 1.24 ± 0.71       | -2.93 ± -3.46     | -Inf ± -Inf       | -Inf ± -Inf       | -Inf ± 0                |
| 15  | 0 ± 0           | 0.94 ± 0.4        | -3.28 ± -3.81     | -Inf ± -Inf       | -Inf ± -Inf       | -Inf ± 0                |
| 16  | 0 ± 0           | 0.64 ± 0.1        | -3.62 ± -4.16     | -Inf ± -Inf       | -Inf ± -Inf       | -Inf ± 0                |
| 17  | 0 ± 0           | 0.34 ± -0.2       | -3.97 ± -4.51     | -Inf ± -Inf       | -Inf ± -Inf       | -Inf ± 0                |
| 18  | 0 ± 0           | 0.04 ± -0.5       | -4.32 ± -4.85     | -Inf ± -Inf       | -Inf ± -Inf       | -Inf ± 0                |
| 19  | 0 ± 0           | -0.26 ± -0.8      | -4.66 ± -5.2      | -Inf ± -Inf       | -Inf ± -Inf       | -Inf ± 0                |
| 20  | 0 ± 0           | -0.56 ± -1.1      | -5 ± -5.54        | -Inf ± -Inf       | -Inf ± -Inf       | -Inf ± 0                |
| 21  | 0 ± 0           | -0.87 ± -1.4      | -5.34 ± -5.88     | -Inf ± -Inf       | -Inf ± -Inf       | -Inf ± 0                |
| 22  | 0 ± 0           | -1.17 ± -1.7      | -5.68 ± -6.21     | -Inf ± -Inf       | -Inf ± -Inf       | -Inf ± 0                |
| 23  | 0 ± 0           | -1.47 ± -2        | -6.01 ± -6.55     | -Inf ± -Inf       | -Inf ± -Inf       | -Inf ± 0                |
| 24  | 0 ± 0           | -1.77 ± -2.3      | -6.35 ± -6.89     | -Inf ± -Inf       | -Inf ± -Inf       | -Inf ± 0                |
| 25  | 0 ± 0           | -2.07 ± -2.61     | -6.69 ± -7.22     | -Inf ± -Inf       | -Inf ± -Inf       | -Inf ± 0                |
| 26  | 0 ± 0           | -2.37 ± -2.91     | -7.02 ± -7.56     | -Inf ± -Inf       | -Inf ± -Inf       | -Inf ± 0                |
| 27  | 0 ± 0           | -2.67 ± -3.21     | -7.35 ± -7.89     | -Inf ± -Inf       | -Inf ± -Inf       | -Inf ± 0                |
| 28  | 0 ± 0           | -2.97 ± -3.51     | -7.69 ± -8.22     | -Inf ± -Inf       | -Inf ± -Inf       | -Inf ± 0                |
| 29  | 0 ± 0           | -3.27 ± -3.81     | -8.02 ± -8.55     | -Inf ± -Inf       | -Inf ± -Inf       | -Inf ± 0                |
| 30  | 0 ± 0           | -3.57 ± -4.11     | -8.35 ± -8.88     | -Inf ± -Inf       | -Inf ± -Inf       | -Inf ± 0                |
| 31  | 0 ± 0           | -3.88 ± -4.41     | -8.68 ± -9.21     | -Inf ± -Inf       | -Inf ± -Inf       | -Inf ± 0                |
| 32  | 0 ± 0           | -4.18 ± -4.71     | -9.01 ± -9.54     | -Inf ± -Inf       | -Inf ± -Inf       | -Inf ± 0                |
| 33  | 0 ± 0           | -4.48 ± -5.01     | -9.33 ± -9.87     | -Inf ± -Inf       | -Inf ± -Inf       | -Inf ± 0                |
| 34  | 0 ± 0           | -4.78 ± -5.31     | -9.66 ± -10.2     | -Inf ± -Inf       | -Inf ± -Inf       | -Inf ± 0                |
| 35  | 0 ± 0           | -5.08 ± -5.62     | -9.99 ± -10.52    | -Inf ± -Inf       | -Inf ± -Inf       | -Inf ± 0                |
| 36  | 0 ± 0           | -5.38 ± -5.92     | -10.31 ± -10.85   | -Inf ± -Inf       | -Inf ± -Inf       | -Inf ± 0                |
| 37  | 0 ± 0           | -5.68 ± -6.22     | -10.64 ± -11.17   | -Inf ± -Inf       | -Inf ± -Inf       | -Inf ± 0                |

The average of the prevalence, the CFU-values per square meter (cfu/sqm) and per gram manure are calculated over all iterations. The CFU values in the intestine as well as the excreted and ingested quantities are obtained by calculating the average over all animals in one iteration at first and then over all iterations. The decadic logarithm of zero or negative values is negative infinite (-Inf).



**Figure S20.** Calculated infection dynamic for the scenario when the pen is contaminated with  $10^6$  CFU at the beginning of the fattening period, measure 6000 g litter/m<sup>2</sup>. Dotplots with results for 90 negative birds, Ross 308, feeding duration 36 days, stocking density 39 kg/m<sup>2</sup>, 6000 g litter/m<sup>2</sup> (no infection of birds, thus no plots).

**Table S20a (CFU). Calculated numeric values for scenario when the pen is contaminated with  $10^6$  CFU at the beginning of the fattening period, measure 6000 g litter/m<sup>2</sup>. Setting: 90 negative birds, Ross 308, feeding duration 36 days, stocking density 39 kg/m<sup>2</sup>, 6000 g litter/m<sup>2</sup>**

| day | prevalence in % | cfu/sqm           | cfu/g manure        | cfu in intestine | cfu/g feces     | cfu ingested per animal |
|-----|-----------------|-------------------|---------------------|------------------|-----------------|-------------------------|
|     | (mean $\pm$ sd) | (mean $\pm$ sd)   | (mean $\pm$ sd)     | (mean $\pm$ sd)  | (mean $\pm$ sd) | (mean $\pm$ sd)         |
| 1   | 0 $\pm$ 0       | 9.3e4 $\pm$ 0e4   | 1.5e1 $\pm$ 0e1     | 0e0 $\pm$ 0      | 0e0 $\pm$ 0     | 0e0 $\pm$ 0             |
| 2   | 0 $\pm$ 0       | 4.6e4 $\pm$ 0e4   | 7.3 $\pm$ 0         | 0e0 $\pm$ 0      | 0e0 $\pm$ 0     | 0e0 $\pm$ 0             |
| 3   | 0 $\pm$ 0       | 2.3e4 $\pm$ 0e4   | 3.5 $\pm$ 0         | 0e0 $\pm$ 0      | 0e0 $\pm$ 0     | 1 $\pm$ 0               |
| 4   | 0 $\pm$ 0       | 1.2e4 $\pm$ 0e4   | 1.6 $\pm$ 0         | 0e0 $\pm$ 0      | 0e0 $\pm$ 0     | 1 $\pm$ 0               |
| 5   | 0 $\pm$ 0       | 5.8e3 $\pm$ 0e3   | 7.5e-1 $\pm$ 0e-1   | 0e0 $\pm$ 0      | 0e0 $\pm$ 0     | 0e0 $\pm$ 0             |
| 6   | 0 $\pm$ 0       | 2.9e3 $\pm$ 0e3   | 3.5e-1 $\pm$ 0e-1   | 0e0 $\pm$ 0      | 0e0 $\pm$ 0     | 0e0 $\pm$ 0             |
| 7   | 0 $\pm$ 0       | 1.5e3 $\pm$ 0e3   | 1.6e-1 $\pm$ 0e-1   | 0e0 $\pm$ 0      | 0e0 $\pm$ 0     | 0e0 $\pm$ 0             |
| 8   | 0 $\pm$ 0       | 7.3e2 $\pm$ 0e2   | 7.4e-2 $\pm$ 0e-2   | 0e0 $\pm$ 0      | 0e0 $\pm$ 0     | 0e0 $\pm$ 0             |
| 9   | 0 $\pm$ 0       | 3.6e2 $\pm$ 0e2   | 3.4e-2 $\pm$ 0e-2   | 0e0 $\pm$ 0      | 0e0 $\pm$ 0     | 0e0 $\pm$ 0             |
| 10  | 0 $\pm$ 0       | 1.8e2 $\pm$ 0e2   | 1.5e-2 $\pm$ 0e-2   | 0e0 $\pm$ 0      | 0e0 $\pm$ 0     | 0e0 $\pm$ 0             |
| 11  | 0 $\pm$ 0       | 9.1e1 $\pm$ 0e1   | 6.9e-3 $\pm$ 0e-3   | 0e0 $\pm$ 0      | 0e0 $\pm$ 0     | 0e0 $\pm$ 0             |
| 12  | 0 $\pm$ 0       | 4.5e1 $\pm$ 0e1   | 3.1e-3 $\pm$ 0e-3   | 0e0 $\pm$ 0      | 0e0 $\pm$ 0     | 0e0 $\pm$ 0             |
| 13  | 0 $\pm$ 0       | 2.3e1 $\pm$ 0e1   | 1.4e-3 $\pm$ 0e-3   | 0e0 $\pm$ 0      | 0e0 $\pm$ 0     | 0e0 $\pm$ 0             |
| 14  | 0 $\pm$ 0       | 1.1e1 $\pm$ 0e1   | 6.4e-4 $\pm$ 0e-4   | 0e0 $\pm$ 0      | 0e0 $\pm$ 0     | 0e0 $\pm$ 0             |
| 15  | 0 $\pm$ 0       | 5.7 $\pm$ 0       | 2.9e-4 $\pm$ 0e-4   | 0e0 $\pm$ 0      | 0e0 $\pm$ 0     | 0e0 $\pm$ 0             |
| 16  | 0 $\pm$ 0       | 2.8 $\pm$ 0       | 1.3e-4 $\pm$ 0e-4   | 0e0 $\pm$ 0      | 0e0 $\pm$ 0     | 0e0 $\pm$ 0             |
| 17  | 0 $\pm$ 0       | 1.4 $\pm$ 0       | 6.1e-5 $\pm$ 0e-5   | 0e0 $\pm$ 0      | 0e0 $\pm$ 0     | 0e0 $\pm$ 0             |
| 18  | 0 $\pm$ 0       | 7.1e-1 $\pm$ 0e-1 | 2.8e-5 $\pm$ 0e-5   | 0e0 $\pm$ 0      | 0e0 $\pm$ 0     | 0e0 $\pm$ 0             |
| 19  | 0 $\pm$ 0       | 3.5e-1 $\pm$ 0e-1 | 1.3e-5 $\pm$ 0e-5   | 0e0 $\pm$ 0      | 0e0 $\pm$ 0     | 0e0 $\pm$ 0             |
| 20  | 0 $\pm$ 0       | 1.8e-1 $\pm$ 0e-1 | 5.9e-6 $\pm$ 0e-6   | 0e0 $\pm$ 0      | 0e0 $\pm$ 0     | 0e0 $\pm$ 0             |
| 21  | 0 $\pm$ 0       | 8.9e-2 $\pm$ 0e-2 | 2.7e-6 $\pm$ 0e-6   | 0e0 $\pm$ 0      | 0e0 $\pm$ 0     | 0e0 $\pm$ 0             |
| 22  | 0 $\pm$ 0       | 4.4e-2 $\pm$ 0e-2 | 1.2e-6 $\pm$ 0e-6   | 0e0 $\pm$ 0      | 0e0 $\pm$ 0     | 0e0 $\pm$ 0             |
| 23  | 0 $\pm$ 0       | 2.2e-2 $\pm$ 0e-2 | 5.8e-7 $\pm$ 0e-7   | 0e0 $\pm$ 0      | 0e0 $\pm$ 0     | 0e0 $\pm$ 0             |
| 24  | 0 $\pm$ 0       | 1.1e-2 $\pm$ 0e-2 | 2.7e-7 $\pm$ 0e-7   | 0e0 $\pm$ 0      | 0e0 $\pm$ 0     | 0e0 $\pm$ 0             |
| 25  | 0 $\pm$ 0       | 5.5e-3 $\pm$ 0e-3 | 1.2e-7 $\pm$ 0e-7   | 0e0 $\pm$ 0      | 0e0 $\pm$ 0     | 0e0 $\pm$ 0             |
| 26  | 0 $\pm$ 0       | 2.8e-3 $\pm$ 0e-3 | 5.8e-8 $\pm$ 0e-8   | 0e0 $\pm$ 0      | 0e0 $\pm$ 0     | 0e0 $\pm$ 0             |
| 27  | 0 $\pm$ 0       | 1.4e-3 $\pm$ 0e-3 | 2.7e-8 $\pm$ 0e-8   | 0e0 $\pm$ 0      | 0e0 $\pm$ 0     | 0e0 $\pm$ 0             |
| 28  | 0 $\pm$ 0       | 6.9e-4 $\pm$ 0e-4 | 1.3e-8 $\pm$ 0e-8   | 0e0 $\pm$ 0      | 0e0 $\pm$ 0     | 0e0 $\pm$ 0             |
| 29  | 0 $\pm$ 0       | 3.5e-4 $\pm$ 0e-4 | 5.9e-9 $\pm$ 0e-9   | 0e0 $\pm$ 0      | 0e0 $\pm$ 0     | 0e0 $\pm$ 0             |
| 30  | 0 $\pm$ 0       | 1.7e-4 $\pm$ 0e-4 | 2.8e-9 $\pm$ 0e-9   | 0e0 $\pm$ 0      | 0e0 $\pm$ 0     | 0e0 $\pm$ 0             |
| 31  | 0 $\pm$ 0       | 8.7e-5 $\pm$ 0e-5 | 1.3e-9 $\pm$ 0e-9   | 0e0 $\pm$ 0      | 0e0 $\pm$ 0     | 0e0 $\pm$ 0             |
| 32  | 0 $\pm$ 0       | 4.3e-5 $\pm$ 0e-5 | 6.1e-10 $\pm$ 0e-10 | 0e0 $\pm$ 0      | 0e0 $\pm$ 0     | 0e0 $\pm$ 0             |
| 33  | 0 $\pm$ 0       | 2.2e-5 $\pm$ 0e-5 | 2.9e-10 $\pm$ 0e-10 | 0e0 $\pm$ 0      | 0e0 $\pm$ 0     | 0e0 $\pm$ 0             |
| 34  | 0 $\pm$ 0       | 1.1e-5 $\pm$ 0e-5 | 1.4e-10 $\pm$ 0e-10 | 0e0 $\pm$ 0      | 0e0 $\pm$ 0     | 0e0 $\pm$ 0             |
| 35  | 0 $\pm$ 0       | 5.4e-6 $\pm$ 0e-6 | 6.4e-11 $\pm$ 0e-11 | 0e0 $\pm$ 0      | 0e0 $\pm$ 0     | 0e0 $\pm$ 0             |
| 36  | 0 $\pm$ 0       | 2.7e-6 $\pm$ 0e-6 | 3.1e-11 $\pm$ 0e-11 | 0e0 $\pm$ 0      | 0e0 $\pm$ 0     | 0e0 $\pm$ 0             |
| 37  | 0 $\pm$ 0       | 1.4e-6 $\pm$ 0e-6 | 1.4e-11 $\pm$ 0e-11 | 0e0 $\pm$ 0      | 0e0 $\pm$ 0     | 0e0 $\pm$ 0             |

The average of the prevalence, the CFU-values per square meter (cfu/sqm) and per gram manure are calculated over all iterations. The CFU values in the intestine as well as the excreted and ingested quantities are obtained by calculating the average over all animals in one iteration at first and then over all iterations.

**Table S20b (log<sub>10</sub> CFU). Calculated numeric values for scenario when the pen is contaminated with 10<sup>6</sup> CFU at the beginning of the fattening period, measure 6000 g litter/m<sup>2</sup>. Setting: 90 negative birds, Ross 308, feeding duration 36 days, stocking density 39 kg/m<sup>2</sup>, 6000 g litter/m<sup>2</sup>**

| day | prevalence in % | cfu/sqm           | cfu/g manure      | cfu in intestine  | cfu/g feces       | cfu ingested per animal |
|-----|-----------------|-------------------|-------------------|-------------------|-------------------|-------------------------|
|     | (% mean ± sd)   | (log10 mean ± sd) | (log10 mean ± sd) | (log10 mean ± sd) | (log10 mean ± sd) | (log10 mean ± sd)       |
| 1   | 0 ± 0           | 4.97 ± -Inf       | 1.18 ± -Inf       | -Inf ± -Inf       | -Inf ± -Inf       | -Inf ± 0                |
| 2   | 0 ± 0           | 4.67 ± -Inf       | 0.87 ± -Inf       | -Inf ± -Inf       | -Inf ± -Inf       | -Inf ± 0                |
| 3   | 0 ± 0           | 4.37 ± -Inf       | 0.54 ± -Inf       | -Inf ± -Inf       | -Inf ± -Inf       | 0 ± 0                   |
| 4   | 0 ± 0           | 4.06 ± -Inf       | 0.21 ± -Inf       | -Inf ± -Inf       | -Inf ± -Inf       | 0 ± 0                   |
| 5   | 0 ± 0           | 3.76 ± -Inf       | -0.13 ± -Inf      | -Inf ± -Inf       | -Inf ± -Inf       | -Inf ± 0                |
| 6   | 0 ± 0           | 3.46 ± -Inf       | -0.45 ± -Inf      | -Inf ± -Inf       | -Inf ± -Inf       | -Inf ± 0                |
| 7   | 0 ± 0           | 3.16 ± -Inf       | -0.79 ± -Inf      | -Inf ± -Inf       | -Inf ± -Inf       | -Inf ± 0                |
| 8   | 0 ± 0           | 2.86 ± -Inf       | -1.13 ± -Inf      | -Inf ± -Inf       | -Inf ± -Inf       | -Inf ± 0                |
| 9   | 0 ± 0           | 2.56 ± -Inf       | -1.47 ± -Inf      | -Inf ± -Inf       | -Inf ± -Inf       | -Inf ± 0                |
| 10  | 0 ± 0           | 2.26 ± -Inf       | -1.82 ± -Inf      | -Inf ± -Inf       | -Inf ± -Inf       | -Inf ± 0                |
| 11  | 0 ± 0           | 1.96 ± -Inf       | -2.16 ± -Inf      | -Inf ± -Inf       | -Inf ± -Inf       | -Inf ± 0                |
| 12  | 0 ± 0           | 1.66 ± -Inf       | -2.51 ± -Inf      | -Inf ± -Inf       | -Inf ± -Inf       | -Inf ± 0                |
| 13  | 0 ± 0           | 1.36 ± -Inf       | -2.85 ± -Inf      | -Inf ± -Inf       | -Inf ± -Inf       | -Inf ± 0                |
| 14  | 0 ± 0           | 1.05 ± -Inf       | -3.19 ± -Inf      | -Inf ± -Inf       | -Inf ± -Inf       | -Inf ± 0                |
| 15  | 0 ± 0           | 0.75 ± -Inf       | -3.54 ± -Inf      | -Inf ± -Inf       | -Inf ± -Inf       | -Inf ± 0                |
| 16  | 0 ± 0           | 0.45 ± -Inf       | -3.88 ± -Inf      | -Inf ± -Inf       | -Inf ± -Inf       | -Inf ± 0                |
| 17  | 0 ± 0           | 0.15 ± -Inf       | -4.22 ± -Inf      | -Inf ± -Inf       | -Inf ± -Inf       | -Inf ± 0                |
| 18  | 0 ± 0           | -0.15 ± -Inf      | -4.56 ± -Inf      | -Inf ± -Inf       | -Inf ± -Inf       | -Inf ± 0                |
| 19  | 0 ± 0           | -0.45 ± -Inf      | -4.9 ± -Inf       | -Inf ± -Inf       | -Inf ± -Inf       | -Inf ± 0                |
| 20  | 0 ± 0           | -0.75 ± -Inf      | -5.23 ± -Inf      | -Inf ± -Inf       | -Inf ± -Inf       | -Inf ± 0                |
| 21  | 0 ± 0           | -1.05 ± -Inf      | -5.57 ± -Inf      | -Inf ± -Inf       | -Inf ± -Inf       | -Inf ± 0                |
| 22  | 0 ± 0           | -1.35 ± -Inf      | -5.9 ± -Inf       | -Inf ± -Inf       | -Inf ± -Inf       | -Inf ± 0                |
| 23  | 0 ± 0           | -1.65 ± -Inf      | -6.24 ± -Inf      | -Inf ± -Inf       | -Inf ± -Inf       | -Inf ± 0                |
| 24  | 0 ± 0           | -1.96 ± -Inf      | -6.57 ± -Inf      | -Inf ± -Inf       | -Inf ± -Inf       | -Inf ± 0                |
| 25  | 0 ± 0           | -2.26 ± -Inf      | -6.9 ± -Inf       | -Inf ± -Inf       | -Inf ± -Inf       | -Inf ± 0                |
| 26  | 0 ± 0           | -2.56 ± -Inf      | -7.24 ± -Inf      | -Inf ± -Inf       | -Inf ± -Inf       | -Inf ± 0                |
| 27  | 0 ± 0           | -2.86 ± -Inf      | -7.57 ± -Inf      | -Inf ± -Inf       | -Inf ± -Inf       | -Inf ± 0                |
| 28  | 0 ± 0           | -3.16 ± -Inf      | -7.9 ± -Inf       | -Inf ± -Inf       | -Inf ± -Inf       | -Inf ± 0                |
| 29  | 0 ± 0           | -3.46 ± -Inf      | -8.23 ± -Inf      | -Inf ± -Inf       | -Inf ± -Inf       | -Inf ± 0                |
| 30  | 0 ± 0           | -3.76 ± -Inf      | -8.56 ± -Inf      | -Inf ± -Inf       | -Inf ± -Inf       | -Inf ± 0                |
| 31  | 0 ± 0           | -4.06 ± -Inf      | -8.88 ± -Inf      | -Inf ± -Inf       | -Inf ± -Inf       | -Inf ± 0                |
| 32  | 0 ± 0           | -4.36 ± -Inf      | -9.21 ± -Inf      | -Inf ± -Inf       | -Inf ± -Inf       | -Inf ± 0                |
| 33  | 0 ± 0           | -4.66 ± -Inf      | -9.54 ± -Inf      | -Inf ± -Inf       | -Inf ± -Inf       | -Inf ± 0                |
| 34  | 0 ± 0           | -4.97 ± -Inf      | -9.87 ± -Inf      | -Inf ± -Inf       | -Inf ± -Inf       | -Inf ± 0                |
| 35  | 0 ± 0           | -5.27 ± -Inf      | -10.19 ± -Inf     | -Inf ± -Inf       | -Inf ± -Inf       | -Inf ± 0                |
| 36  | 0 ± 0           | -5.57 ± -Inf      | -10.52 ± -Inf     | -Inf ± -Inf       | -Inf ± -Inf       | -Inf ± 0                |
| 37  | 0 ± 0           | -5.87 ± -Inf      | -10.84 ± -Inf     | -Inf ± -Inf       | -Inf ± -Inf       | -Inf ± 0                |

The average of the prevalence, the CFU-values per square meter (cfu/sqm) and per gram manure are calculated over all iterations. The CFU values in the intestine as well as the excreted and ingested quantities are obtained by calculating the average over all animals in one iteration at first and then over all iterations. The decadic logarithm of zero or negative values is negative infinite (-Inf).



**Figure S21.** Calculated infection dynamic for the scenario when the pen is contaminated with  $10^6$  CFU at the beginning of the fattening period, measure 9000 g litter/m<sup>2</sup>. Dotplots with results for 90 negative birds, Ross 308, feeding duration 36 days, stocking density 39 kg/m<sup>2</sup>, 9000 g litter/m<sup>2</sup> (no infection of birds, thus no plots).

**Table S21a (CFU). Calculated numeric values for scenario when the pen is contaminated with  $10^6$  CFU at the beginning of the fattening period, measure 9000 g litter/m<sup>2</sup>. Setting: 90 negative birds, Ross 308, feeding duration 36 days, stocking density 39 kg/m<sup>2</sup>, 9000 g litter/m<sup>2</sup>**

| day | prevalence in % | cfu/sqm       | cfu/g manure    | cfu in intestine | cfu/g feces | cfu ingested per animal |
|-----|-----------------|---------------|-----------------|------------------|-------------|-------------------------|
|     | (mean ± sd)     | (mean ± sd)   | (mean ± sd)     | (mean ± sd)      | (mean ± sd) | (mean ± sd)             |
| 1   | 0 ± 0           | 9.3e4 ± 0e4   | 1e1 ± 0e1       | 0e0 ± 0          | 0e0 ± 0     | 0e0 ± 0                 |
| 2   | 0 ± 0           | 4.6e4 ± 0e4   | 5 ± 0           | 0e0 ± 0          | 0e0 ± 0     | 0e0 ± 0                 |
| 3   | 0 ± 0           | 2.3e4 ± 0e4   | 2.4 ± 0         | 0e0 ± 0          | 0e0 ± 0     | 1 ± 0                   |
| 4   | 0 ± 0           | 1.2e4 ± 0e4   | 1.1 ± 0         | 0e0 ± 0          | 0e0 ± 0     | 0e0 ± 0                 |
| 5   | 0 ± 0           | 5.8e3 ± 0e3   | 5.4e-1 ± 0e-1   | 0e0 ± 0          | 0e0 ± 0     | 0e0 ± 0                 |
| 6   | 0 ± 0           | 2.9e3 ± 0e3   | 2.6e-1 ± 0e-1   | 0e0 ± 0          | 0e0 ± 0     | 0e0 ± 0                 |
| 7   | 0 ± 0           | 1.5e3 ± 0e3   | 1.2e-1 ± 0e-1   | 0e0 ± 0          | 0e0 ± 0     | 0e0 ± 0                 |
| 8   | 0 ± 0           | 7.3e2 ± 0e2   | 5.7e-2 ± 0e-2   | 0e0 ± 0          | 0e0 ± 0     | 0e0 ± 0                 |
| 9   | 0 ± 0           | 3.6e2 ± 0e2   | 2.6e-2 ± 0e-2   | 0e0 ± 0          | 0e0 ± 0     | 0e0 ± 0                 |
| 10  | 0 ± 0           | 1.8e2 ± 0e2   | 1.2e-2 ± 0e-2   | 0e0 ± 0          | 0e0 ± 0     | 0e0 ± 0                 |
| 11  | 0 ± 0           | 9.1e1 ± 0e1   | 5.6e-3 ± 0e-3   | 0e0 ± 0          | 0e0 ± 0     | 0e0 ± 0                 |
| 12  | 0 ± 0           | 4.5e1 ± 0e1   | 2.6e-3 ± 0e-3   | 0e0 ± 0          | 0e0 ± 0     | 0e0 ± 0                 |
| 13  | 0 ± 0           | 2.3e1 ± 0e1   | 1.2e-3 ± 0e-3   | 0e0 ± 0          | 0e0 ± 0     | 0e0 ± 0                 |
| 14  | 0 ± 0           | 1.1e1 ± 0e1   | 5.5e-4 ± 0e-4   | 0e0 ± 0          | 0e0 ± 0     | 0e0 ± 0                 |
| 15  | 0 ± 0           | 5.7 ± 0       | 2.5e-4 ± 0e-4   | 0e0 ± 0          | 0e0 ± 0     | 0e0 ± 0                 |
| 16  | 0 ± 0           | 2.8 ± 0       | 1.2e-4 ± 0e-4   | 0e0 ± 0          | 0e0 ± 0     | 0e0 ± 0                 |
| 17  | 0 ± 0           | 1.4 ± 0       | 5.4e-5 ± 0e-5   | 0e0 ± 0          | 0e0 ± 0     | 0e0 ± 0                 |
| 18  | 0 ± 0           | 7.1e-1 ± 0e-1 | 2.5e-5 ± 0e-5   | 0e0 ± 0          | 0e0 ± 0     | 0e0 ± 0                 |
| 19  | 0 ± 0           | 3.5e-1 ± 0e-1 | 1.1e-5 ± 0e-5   | 0e0 ± 0          | 0e0 ± 0     | 0e0 ± 0                 |
| 20  | 0 ± 0           | 1.8e-1 ± 0e-1 | 5.3e-6 ± 0e-6   | 0e0 ± 0          | 0e0 ± 0     | 0e0 ± 0                 |
| 21  | 0 ± 0           | 8.9e-2 ± 0e-2 | 2.5e-6 ± 0e-6   | 0e0 ± 0          | 0e0 ± 0     | 0e0 ± 0                 |
| 22  | 0 ± 0           | 4.4e-2 ± 0e-2 | 1.2e-6 ± 0e-6   | 0e0 ± 0          | 0e0 ± 0     | 0e0 ± 0                 |
| 23  | 0 ± 0           | 2.2e-2 ± 0e-2 | 5.4e-7 ± 0e-7   | 0e0 ± 0          | 0e0 ± 0     | 0e0 ± 0                 |
| 24  | 0 ± 0           | 1.1e-2 ± 0e-2 | 2.5e-7 ± 0e-7   | 0e0 ± 0          | 0e0 ± 0     | 0e0 ± 0                 |
| 25  | 0 ± 0           | 5.5e-3 ± 0e-3 | 1.2e-7 ± 0e-7   | 0e0 ± 0          | 0e0 ± 0     | 0e0 ± 0                 |
| 26  | 0 ± 0           | 2.8e-3 ± 0e-3 | 5.5e-8 ± 0e-8   | 0e0 ± 0          | 0e0 ± 0     | 0e0 ± 0                 |
| 27  | 0 ± 0           | 1.4e-3 ± 0e-3 | 2.6e-8 ± 0e-8   | 0e0 ± 0          | 0e0 ± 0     | 0e0 ± 0                 |
| 28  | 0 ± 0           | 6.9e-4 ± 0e-4 | 1.2e-8 ± 0e-8   | 0e0 ± 0          | 0e0 ± 0     | 0e0 ± 0                 |
| 29  | 0 ± 0           | 3.5e-4 ± 0e-4 | 5.6e-9 ± 0e-9   | 0e0 ± 0          | 0e0 ± 0     | 0e0 ± 0                 |
| 30  | 0 ± 0           | 1.7e-4 ± 0e-4 | 2.7e-9 ± 0e-9   | 0e0 ± 0          | 0e0 ± 0     | 0e0 ± 0                 |
| 31  | 0 ± 0           | 8.7e-5 ± 0e-5 | 1.2e-9 ± 0e-9   | 0e0 ± 0          | 0e0 ± 0     | 0e0 ± 0                 |
| 32  | 0 ± 0           | 4.3e-5 ± 0e-5 | 5.9e-10 ± 0e-10 | 0e0 ± 0          | 0e0 ± 0     | 0e0 ± 0                 |
| 33  | 0 ± 0           | 2.2e-5 ± 0e-5 | 2.8e-10 ± 0e-10 | 0e0 ± 0          | 0e0 ± 0     | 0e0 ± 0                 |
| 34  | 0 ± 0           | 1.1e-5 ± 0e-5 | 1.3e-10 ± 0e-10 | 0e0 ± 0          | 0e0 ± 0     | 0e0 ± 0                 |
| 35  | 0 ± 0           | 5.4e-6 ± 0e-6 | 6.2e-11 ± 0e-11 | 0e0 ± 0          | 0e0 ± 0     | 0e0 ± 0                 |
| 36  | 0 ± 0           | 2.7e-6 ± 0e-6 | 3e-11 ± 0e-11   | 0e0 ± 0          | 0e0 ± 0     | 0e0 ± 0                 |
| 37  | 0 ± 0           | 1.4e-6 ± 0e-6 | 1.4e-11 ± 0e-11 | 0e0 ± 0          | 0e0 ± 0     | 0e0 ± 0                 |

The average of the prevalence, the CFU-values per square meter (cfu/sqm) and per gram manure are calculated over all iterations. The CFU values in the intestine as well as the excreted and ingested quantities are obtained by calculating the average over all animals in one iteration at first and then over all iterations.

**Table S21b (log<sub>10</sub> CFU). Calculated numeric values for scenario when the pen is contaminated with 10<sup>6</sup> CFU at the beginning of the fattening period, measure 9000 g litter/m<sup>2</sup>. Setting: 90 negative birds, Ross 308, feeding duration 36 days, stocking density 39 kg/m<sup>2</sup>, 9000 g litter/m<sup>2</sup>**

| day | prevalence in % | cfu/sqm           | cfu/g manure      | cfu in intestine  | cfu/g feces       | cfu ingested per animal |
|-----|-----------------|-------------------|-------------------|-------------------|-------------------|-------------------------|
|     | (% mean ± sd)   | (log10 mean ± sd) | (log10 mean ± sd) | (log10 mean ± sd) | (log10 mean ± sd) | (log10 mean ± sd)       |
| 1   | 0 ± 0           | 4.97 ± -Inf       | 1.01 ± -Inf       | -Inf ± -Inf       | -Inf ± -Inf       | -Inf ± 0                |
| 2   | 0 ± 0           | 4.67 ± -Inf       | 0.7 ± -Inf        | -Inf ± -Inf       | -Inf ± -Inf       | -Inf ± 0                |
| 3   | 0 ± 0           | 4.37 ± -Inf       | 0.38 ± -Inf       | -Inf ± -Inf       | -Inf ± -Inf       | 0 ± 0                   |
| 4   | 0 ± 0           | 4.06 ± -Inf       | 0.06 ± -Inf       | -Inf ± -Inf       | -Inf ± -Inf       | -Inf ± 0                |
| 5   | 0 ± 0           | 3.76 ± -Inf       | -0.27 ± -Inf      | -Inf ± -Inf       | -Inf ± -Inf       | -Inf ± 0                |
| 6   | 0 ± 0           | 3.46 ± -Inf       | -0.59 ± -Inf      | -Inf ± -Inf       | -Inf ± -Inf       | -Inf ± 0                |
| 7   | 0 ± 0           | 3.16 ± -Inf       | -0.92 ± -Inf      | -Inf ± -Inf       | -Inf ± -Inf       | -Inf ± 0                |
| 8   | 0 ± 0           | 2.86 ± -Inf       | -1.25 ± -Inf      | -Inf ± -Inf       | -Inf ± -Inf       | -Inf ± 0                |
| 9   | 0 ± 0           | 2.56 ± -Inf       | -1.58 ± -Inf      | -Inf ± -Inf       | -Inf ± -Inf       | -Inf ± 0                |
| 10  | 0 ± 0           | 2.26 ± -Inf       | -1.91 ± -Inf      | -Inf ± -Inf       | -Inf ± -Inf       | -Inf ± 0                |
| 11  | 0 ± 0           | 1.96 ± -Inf       | -2.25 ± -Inf      | -Inf ± -Inf       | -Inf ± -Inf       | -Inf ± 0                |
| 12  | 0 ± 0           | 1.66 ± -Inf       | -2.59 ± -Inf      | -Inf ± -Inf       | -Inf ± -Inf       | -Inf ± 0                |
| 13  | 0 ± 0           | 1.36 ± -Inf       | -2.92 ± -Inf      | -Inf ± -Inf       | -Inf ± -Inf       | -Inf ± 0                |
| 14  | 0 ± 0           | 1.05 ± -Inf       | -3.26 ± -Inf      | -Inf ± -Inf       | -Inf ± -Inf       | -Inf ± 0                |
| 15  | 0 ± 0           | 0.75 ± -Inf       | -3.6 ± -Inf       | -Inf ± -Inf       | -Inf ± -Inf       | -Inf ± 0                |
| 16  | 0 ± 0           | 0.45 ± -Inf       | -3.93 ± -Inf      | -Inf ± -Inf       | -Inf ± -Inf       | -Inf ± 0                |
| 17  | 0 ± 0           | 0.15 ± -Inf       | -4.27 ± -Inf      | -Inf ± -Inf       | -Inf ± -Inf       | -Inf ± 0                |
| 18  | 0 ± 0           | -0.15 ± -Inf      | -4.61 ± -Inf      | -Inf ± -Inf       | -Inf ± -Inf       | -Inf ± 0                |
| 19  | 0 ± 0           | -0.45 ± -Inf      | -4.94 ± -Inf      | -Inf ± -Inf       | -Inf ± -Inf       | -Inf ± 0                |
| 20  | 0 ± 0           | -0.75 ± -Inf      | -5.27 ± -Inf      | -Inf ± -Inf       | -Inf ± -Inf       | -Inf ± 0                |
| 21  | 0 ± 0           | -1.05 ± -Inf      | -5.61 ± -Inf      | -Inf ± -Inf       | -Inf ± -Inf       | -Inf ± 0                |
| 22  | 0 ± 0           | -1.35 ± -Inf      | -5.94 ± -Inf      | -Inf ± -Inf       | -Inf ± -Inf       | -Inf ± 0                |
| 23  | 0 ± 0           | -1.65 ± -Inf      | -6.27 ± -Inf      | -Inf ± -Inf       | -Inf ± -Inf       | -Inf ± 0                |
| 24  | 0 ± 0           | -1.96 ± -Inf      | -6.6 ± -Inf       | -Inf ± -Inf       | -Inf ± -Inf       | -Inf ± 0                |
| 25  | 0 ± 0           | -2.26 ± -Inf      | -6.93 ± -Inf      | -Inf ± -Inf       | -Inf ± -Inf       | -Inf ± 0                |
| 26  | 0 ± 0           | -2.56 ± -Inf      | -7.26 ± -Inf      | -Inf ± -Inf       | -Inf ± -Inf       | -Inf ± 0                |
| 27  | 0 ± 0           | -2.86 ± -Inf      | -7.59 ± -Inf      | -Inf ± -Inf       | -Inf ± -Inf       | -Inf ± 0                |
| 28  | 0 ± 0           | -3.16 ± -Inf      | -7.92 ± -Inf      | -Inf ± -Inf       | -Inf ± -Inf       | -Inf ± 0                |
| 29  | 0 ± 0           | -3.46 ± -Inf      | -8.25 ± -Inf      | -Inf ± -Inf       | -Inf ± -Inf       | -Inf ± 0                |
| 30  | 0 ± 0           | -3.76 ± -Inf      | -8.58 ± -Inf      | -Inf ± -Inf       | -Inf ± -Inf       | -Inf ± 0                |
| 31  | 0 ± 0           | -4.06 ± -Inf      | -8.9 ± -Inf       | -Inf ± -Inf       | -Inf ± -Inf       | -Inf ± 0                |
| 32  | 0 ± 0           | -4.36 ± -Inf      | -9.23 ± -Inf      | -Inf ± -Inf       | -Inf ± -Inf       | -Inf ± 0                |
| 33  | 0 ± 0           | -4.66 ± -Inf      | -9.56 ± -Inf      | -Inf ± -Inf       | -Inf ± -Inf       | -Inf ± 0                |
| 34  | 0 ± 0           | -4.97 ± -Inf      | -9.88 ± -Inf      | -Inf ± -Inf       | -Inf ± -Inf       | -Inf ± 0                |
| 35  | 0 ± 0           | -5.27 ± -Inf      | -10.21 ± -Inf     | -Inf ± -Inf       | -Inf ± -Inf       | -Inf ± 0                |
| 36  | 0 ± 0           | -5.57 ± -Inf      | -10.53 ± -Inf     | -Inf ± -Inf       | -Inf ± -Inf       | -Inf ± 0                |
| 37  | 0 ± 0           | -5.87 ± -Inf      | -10.85 ± -Inf     | -Inf ± -Inf       | -Inf ± -Inf       | -Inf ± 0                |

The average of the prevalence, the CFU-values per square meter (cfu/sqm) and per gram manure are calculated over all iterations. The CFU values in the intestine as well as the excreted and ingested quantities are obtained by calculating the average over all animals in one iteration at first and then over all iterations. The decadic logarithm of zero or negative values is negative infinite (-Inf).

Model results averaged over all 100 iterations with breed: rowan ranger , stocking density: 39 kg/sqm and 90 chicken ( 0 seeders and 90 sentinels )

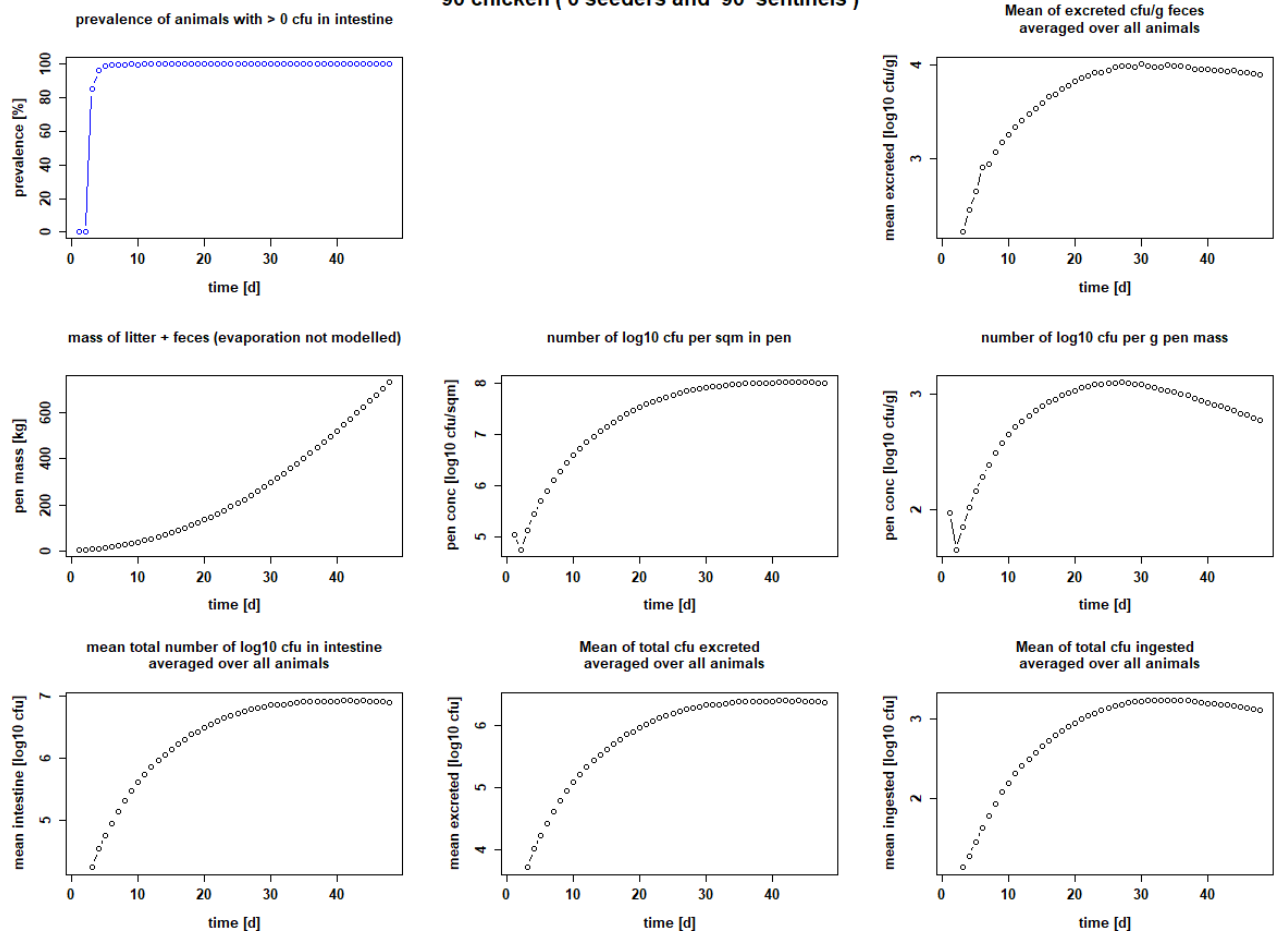

**Figure S22. Calculated infection dynamic for the scenario when the pen is contaminated with  $10^6$  CFU at the beginning of the fattening period, measure slow growing breed.** Dotplots with results for 90 negative birds, Rowan x Ranger, feeding duration 47 days, stocking density 39 kg/m<sup>2</sup>, 1000 g litter/m<sup>2</sup>



**Table S22a (CFU). Calculated numeric values for scenario when the pen is contaminated with 106 CFU at the beginning of the fattening period, measure slow growing breed. Setting: 90 negative birds, Rowan x Ranger, feeding duration 47 days, stocking density 39 kg/m<sup>2</sup>, 1000 g litter/m<sup>2</sup>**

| day | prevalence in % | cfu/sqm       | cfu/g manure  | cfu in intestine | cfu/g feces   | cfu ingested per animal |
|-----|-----------------|---------------|---------------|------------------|---------------|-------------------------|
|     | (mean ± sd)     | (mean ± sd)   | (mean ± sd)   | (mean ± sd)      | (mean ± sd)   | (mean ± sd)             |
| 1   | 0 ± 0           | 1.1e5 ± 0e5   | 9.4e1 ± 0e1   | 0e0 ± 0          | 0e0 ± 0       | 0e0 ± 0                 |
| 2   | 0 ± 0           | 5.7e4 ± 0e4   | 4.5e1 ± 0e1   | 0e0 ± 0          | 0e0 ± 0       | 0e0 ± 0                 |
| 3   | 85.04 ± 4.26    | 1.4e5 ± 0.3e5 | 7.2e1 ± 1.6e1 | 1.7e4 ± 0.5e4    | 1.7e2 ± 0.5e2 | 1.4e1 ± 0e1             |
| 4   | 96.62 ± 2.15    | 2.8e5 ± 0.8e5 | 1.1e2 ± 0.3e2 | 3.5e4 ± 1.1e4    | 2.9e2 ± 0.9e2 | 1.96e1 ± 0.5e1          |
| 5   | 99.19 ± 1       | 5e5 ± 1.6e5   | 1.5e2 ± 0.5e2 | 5.8e4 ± 2.2e4    | 4.5e2 ± 1.7e2 | 2.94e1 ± 0.9e1          |
| 6   | 99.89 ± 0.37    | 8e5 ± 2.8e5   | 1.9e2 ± 0.7e2 | 8.9e4 ± 3.6e4    | 8.2e2 ± 3.3e2 | 4.42e1 ± 1.5e1          |
| 7   | 99.94 ± 0.33    | 1.3e6 ± 0.5e6 | 2.5e2 ± 1e2   | 1.4e5 ± 0.6e5    | 8.9e2 ± 3.8e2 | 6.22e1 ± 2.2e1          |
| 8   | 99.99 ± 0.11    | 1.9e6 ± 0.8e6 | 3.1e2 ± 1.3e2 | 2.1e5 ± 1e5      | 1.2e3 ± 0.5e3 | 8.64e1 ± 3.4e1          |
| 9   | 100 ± 0         | 2.8e6 ± 1.1e6 | 3.8e2 ± 1.5e2 | 3e5 ± 1.3e5      | 1.5e3 ± 0.7e3 | 1.21e2 ± 0.5e2          |
| 10  | 99.99 ± 0.11    | 3.9e6 ± 1.7e6 | 4.5e2 ± 1.9e2 | 4.1e5 ± 2e5      | 1.8e3 ± 0.9e3 | 1.58e2 ± 0.6e2          |
| 11  | 100 ± 0         | 5.4e6 ± 2.4e6 | 5.2e2 ± 2.3e2 | 5.6e5 ± 2.7e5    | 2.2e3 ± 1e3   | 2.06e2 ± 0.9e2          |
| 12  | 100 ± 0         | 7e6 ± 3.1e6   | 5.9e2 ± 2.6e2 | 7.1e5 ± 3.4e5    | 2.6e3 ± 1.2e3 | 2.55e2 ± 1.1e2          |
| 13  | 100 ± 0         | 9.1e6 ± 4.4e6 | 6.6e2 ± 3.2e2 | 9.1e5 ± 4.9e5    | 3e3 ± 1.6e3   | 3.13e2 ± 1.4e2          |
| 14  | 100 ± 0         | 1.1e7 ± 0.5e7 | 7.2e2 ± 3.5e2 | 1.1e6 ± 0.6e6    | 3.4e3 ± 1.7e3 | 3.78e2 ± 1.8e2          |
| 15  | 100 ± 0         | 1.4e7 ± 0.7e7 | 7.9e2 ± 3.9e2 | 1.4e6 ± 0.7e6    | 3.9e3 ± 2.1e3 | 4.45e2 ± 2.1e2          |
| 16  | 100 ± 0         | 1.7e7 ± 0.9e7 | 8.6e2 ± 4.3e2 | 1.7e6 ± 0.9e6    | 4.6e3 ± 2.5e3 | 5.29e2 ± 2.6e2          |
| 17  | 100 ± 0         | 2.1e7 ± 1.1e7 | 9.1e2 ± 4.7e2 | 2e6 ± 1.1e6      | 4.9e3 ± 2.6e3 | 6.14e2 ± 3.1e2          |
| 18  | 100 ± 0         | 2.5e7 ± 1.3e7 | 9.9e2 ± 5e2   | 2.4e6 ± 1.3e6    | 5.6e3 ± 2.9e3 | 6.9e2 ± 3.5e2           |
| 19  | 100 ± 0         | 2.9e7 ± 1.5e7 | 1e3 ± 0.5e3   | 2.7e6 ± 1.4e6    | 6e3 ± 3.2e3   | 8.04e2 ± 4e2            |
| 20  | 100 ± 0         | 3.3e7 ± 1.7e7 | 1.1e3 ± 0.5e3 | 3.1e6 ± 1.6e6    | 6.7e3 ± 3.5e3 | 8.84e2 ± 4.5e2          |
| 21  | 100 ± 0         | 3.8e7 ± 2e7   | 1.1e3 ± 0.6e3 | 3.5e6 ± 2.1e6    | 7.3e3 ± 4.3e3 | 9.72e2 ± 4.9e2          |
| 22  | 100 ± 0         | 4.3e7 ± 2.2e7 | 1.2e3 ± 0.6e3 | 3.9e6 ± 2.1e6    | 7.7e3 ± 4.2e3 | 1.08e3 ± 0.6e3          |
| 23  | 100 ± 0         | 4.9e7 ± 2.7e7 | 1.2e3 ± 0.7e3 | 4.4e6 ± 2.7e6    | 8.4e3 ± 5.1e3 | 1.16e3 ± 0.6e3          |
| 24  | 100 ± 0         | 5.4e7 ± 2.8e7 | 1.2e3 ± 0.6e3 | 4.8e6 ± 2.6e6    | 8.4e3 ± 4.5e3 | 1.28e3 ± 0.7e3          |
| 25  | 100 ± 0         | 5.9e7 ± 3e7   | 1.2e3 ± 0.6e3 | 5.2e6 ± 2.8e6    | 8.9e3 ± 4.9e3 | 1.34e3 ± 0.7e3          |
| 26  | 100 ± 0         | 6.4e7 ± 3.4e7 | 1.3e3 ± 0.7e3 | 5.6e6 ± 3.2e6    | 9.5e3 ± 5.4e3 | 1.43e3 ± 0.7e3          |
| 27  | 100 ± 0         | 7e7 ± 3.8e7   | 1.3e3 ± 0.7e3 | 6.2e6 ± 3.6e6    | 9.9e3 ± 5.8e3 | 1.49e3 ± 0.8e3          |
| 28  | 100 ± 0         | 7.4e7 ± 4e7   | 1.3e3 ± 0.7e3 | 6.4e6 ± 3.6e6    | 9.7e3 ± 5.5e3 | 1.59e3 ± 0.9e3          |
| 29  | 100 ± 0         | 7.7e7 ± 4.1e7 | 1.2e3 ± 0.6e3 | 6.6e6 ± 3.6e6    | 9.5e3 ± 5.2e3 | 1.62e3 ± 0.9e3          |
| 30  | 100 ± 0         | 8.2e7 ± 4e7   | 1.2e3 ± 0.6e3 | 7.1e6 ± 3.5e6    | 1e4 ± 0.5e4   | 1.63e3 ± 0.9e3          |
| 31  | 100 ± 0         | 8.5e7 ± 4.2e7 | 1.2e3 ± 0.6e3 | 7.1e6 ± 3.8e6    | 9.7e3 ± 5.2e3 | 1.7e3 ± 0.8e3           |
| 32  | 100 ± 0         | 8.7e7 ± 4.4e7 | 1.1e3 ± 0.6e3 | 7.3e6 ± 3.9e6    | 9.6e3 ± 5.1e3 | 1.69e3 ± 0.8e3          |
| 33  | 100 ± 0         | 9e7 ± 4.2e7   | 1.1e3 ± 0.5e3 | 7.5e6 ± 3.6e6    | 9.5e3 ± 4.6e3 | 1.68e3 ± 0.8e3          |
| 34  | 100 ± 0         | 9.3e7 ± 4.4e7 | 1.1e3 ± 0.5e3 | 7.9e6 ± 3.8e6    | 9.9e3 ± 4.8e3 | 1.67e3 ± 0.8e3          |
| 35  | 100 ± 0         | 9.6e7 ± 4.3e7 | 1.1e3 ± 0.5e3 | 8e6 ± 3.7e6      | 9.7e3 ± 4.5e3 | 1.68e3 ± 0.8e3          |
| 36  | 100 ± 0         | 9.8e7 ± 4.5e7 | 1e3 ± 0.5e3   | 8.1e6 ± 4.2e6    | 9.7e3 ± 5e3   | 1.68e3 ± 0.8e3          |
| 37  | 100 ± 0         | 9.9e7 ± 4.5e7 | 9.8e2 ± 4.4e2 | 8.3e6 ± 3.9e6    | 9.6e3 ± 4.6e3 | 1.66e3 ± 0.8e3          |
| 38  | 100 ± 0         | 9.9e7 ± 4.5e7 | 9.3e2 ± 4.2e2 | 8.1e6 ± 4e6      | 9.1e3 ± 4.5e3 | 1.64e3 ± 0.7e3          |
| 39  | 100 ± 0         | 9.9e7 ± 4.5e7 | 8.8e2 ± 4e2   | 8.1e6 ± 4e6      | 8.9e3 ± 4.4e3 | 1.59e3 ± 0.7e3          |
| 40  | 100 ± 0         | 1e8 ± 0.5e8   | 8.5e2 ± 3.8e2 | 8.3e6 ± 3.9e6    | 9e3 ± 4.3e3   | 1.55e3 ± 0.7e3          |
| 41  | 100 ± 0         | 1e8 ± 0.5e8   | 8.2e2 ± 3.7e2 | 8.4e6 ± 4.3e6    | 8.8e3 ± 4.5e3 | 1.51e3 ± 0.7e3          |
| 42  | 100 ± 0         | 1e8 ± 0.5e8   | 8e2 ± 3.7e2   | 8.6e6 ± 4.3e6    | 8.9e3 ± 4.4e3 | 1.49e3 ± 0.7e3          |
| 43  | 100 ± 0         | 1e8 ± 0.5e8   | 7.6e2 ± 3.3e2 | 8.3e6 ± 3.9e6    | 8.6e3 ± 4.1e3 | 1.47e3 ± 0.7e3          |
| 44  | 100 ± 0         | 1e8 ± 0.5e8   | 7.2e2 ± 3.3e2 | 8.4e6 ± 4.2e6    | 8.7e3 ± 4.4e3 | 1.42e3 ± 0.6e3          |
| 45  | 100 ± 0         | 1e8 ± 0.5e8   | 6.9e2 ± 3.1e2 | 8.2e6 ± 4e6      | 8.4e3 ± 4.1e3 | 1.38e3 ± 0.6e3          |
| 46  | 100 ± 0         | 1e8 ± 0.5e8   | 6.6e2 ± 3e2   | 8.3e6 ± 4.3e6    | 8.3e3 ± 4.2e3 | 1.33e3 ± 0.6e3          |
| 47  | 100 ± 0         | 1e8 ± 0.4e8   | 6.3e2 ± 2.7e2 | 8.2e6 ± 3.8e6    | 8.2e3 ± 3.8e3 | 1.29e3 ± 0.6e3          |
| 48  | 100 ± 0         | 9.9e7 ± 4.3e7 | 6e2 ± 2.6e2   | 7.9e6 ± 3.7e6    | 7.8e3 ± 3.6e3 | 1.25e3 ± 0.5e3          |

The average of the prevalence, the CFU-values per square meter (cfu/sqm) and per gram manure are calculated over all iterations. The CFU values in the intestine as well as the excreted and ingested quantities are obtained by calculating the average over all animals in one iteration at first and then over all iterations.

**Table S22b (log<sub>10</sub> CFU). Calculated numeric values for scenario when the pen is contaminated with 10<sup>6</sup> CFU at the beginning of the fattening period, measure slow growing breed. Setting: 90 negative birds, Rowan x Ranger, feeding duration 47 days, stocking density 39 kg/m<sup>2</sup>, 1000 g litter/m<sup>2</sup>**

| day | prevalence in % | cfu/sqm           | cfu/g manure      | cfu in intestine  | cfu/g feces       | cfu ingested per animal |
|-----|-----------------|-------------------|-------------------|-------------------|-------------------|-------------------------|
|     | (% mean ± sd)   | (log10 mean ± sd) | (log10 mean ± sd) | (log10 mean ± sd) | (log10 mean ± sd) | (log10 mean ± sd)       |
| 1   | 0 ± 0           | 5.05 ± -Inf       | 1.97 ± -Inf       | -Inf ± -Inf       | -Inf ± -Inf       | -Inf ± 0                |
| 2   | 0 ± 0           | 4.75 ± -Inf       | 1.66 ± -Inf       | -Inf ± -Inf       | -Inf ± -Inf       | -Inf ± 0                |
| 3   | 85.04 ± 4.26    | 5.13 ± 4.49       | 1.86 ± 1.22       | 4.24 ± 3.71       | 2.22 ± 1.69       | 1.15 ± 0                |
| 4   | 96.62 ± 2.15    | 5.45 ± 4.9        | 2.03 ± 1.48       | 4.54 ± 4.05       | 2.46 ± 1.97       | 1.29 ± 0.67             |
| 5   | 99.19 ± 1       | 5.7 ± 5.21        | 2.16 ± 1.68       | 4.77 ± 4.34       | 2.65 ± 2.22       | 1.47 ± 0.93             |
| 6   | 99.89 ± 0.37    | 5.9 ± 5.45        | 2.29 ± 1.84       | 4.95 ± 4.55       | 2.92 ± 2.51       | 1.65 ± 1.17             |
| 7   | 99.94 ± 0.33    | 6.1 ± 5.69        | 2.39 ± 1.98       | 5.15 ± 4.78       | 2.95 ± 2.58       | 1.79 ± 1.35             |
| 8   | 99.99 ± 0.11    | 6.28 ± 5.9        | 2.49 ± 2.12       | 5.32 ± 4.98       | 3.07 ± 2.74       | 1.94 ± 1.53             |
| 9   | 100 ± 0         | 6.44 ± 6.05       | 2.58 ± 2.19       | 5.47 ± 5.11       | 3.18 ± 2.82       | 2.08 ± 1.71             |
| 10  | 99.99 ± 0.11    | 6.59 ± 6.23       | 2.65 ± 2.29       | 5.61 ± 5.29       | 3.27 ± 2.94       | 2.2 ± 1.81              |
| 11  | 100 ± 0         | 6.73 ± 6.38       | 2.72 ± 2.36       | 5.75 ± 5.43       | 3.34 ± 3.02       | 2.31 ± 1.95             |
| 12  | 100 ± 0         | 6.85 ± 6.5        | 2.77 ± 2.42       | 5.85 ± 5.53       | 3.41 ± 3.09       | 2.41 ± 2.05             |
| 13  | 100 ± 0         | 6.96 ± 6.65       | 2.82 ± 2.51       | 5.96 ± 5.69       | 3.48 ± 3.21       | 2.5 ± 2.15              |
| 14  | 100 ± 0         | 7.06 ± 6.74       | 2.86 ± 2.54       | 6.05 ± 5.75       | 3.54 ± 3.24       | 2.58 ± 2.27             |
| 15  | 100 ± 0         | 7.15 ± 6.84       | 2.9 ± 2.59        | 6.14 ± 5.87       | 3.59 ± 3.33       | 2.65 ± 2.33             |
| 16  | 100 ± 0         | 7.24 ± 6.94       | 2.94 ± 2.64       | 6.23 ± 5.96       | 3.66 ± 3.39       | 2.72 ± 2.42             |
| 17  | 100 ± 0         | 7.31 ± 7.02       | 2.96 ± 2.67       | 6.29 ± 6.02       | 3.69 ± 3.42       | 2.79 ± 2.49             |
| 18  | 100 ± 0         | 7.4 ± 7.1         | 3 ± 2.7           | 6.38 ± 6.1        | 3.75 ± 3.47       | 2.84 ± 2.55             |
| 19  | 100 ± 0         | 7.46 ± 7.17       | 3.02 ± 2.72       | 6.43 ± 6.16       | 3.78 ± 3.51       | 2.91 ± 2.61             |
| 20  | 100 ± 0         | 7.52 ± 7.22       | 3.04 ± 2.73       | 6.49 ± 6.21       | 3.83 ± 3.55       | 2.95 ± 2.65             |
| 21  | 100 ± 0         | 7.58 ± 7.31       | 3.06 ± 2.78       | 6.55 ± 6.32       | 3.86 ± 3.63       | 2.99 ± 2.69             |
| 22  | 100 ± 0         | 7.63 ± 7.34       | 3.07 ± 2.77       | 6.59 ± 6.32       | 3.89 ± 3.62       | 3.03 ± 2.76             |
| 23  | 100 ± 0         | 7.69 ± 7.43       | 3.09 ± 2.83       | 6.65 ± 6.43       | 3.93 ± 3.71       | 3.06 ± 2.77             |
| 24  | 100 ± 0         | 7.73 ± 7.45       | 3.09 ± 2.81       | 6.68 ± 6.41       | 3.92 ± 3.66       | 3.11 ± 2.85             |
| 25  | 100 ± 0         | 7.77 ± 7.48       | 3.09 ± 2.81       | 6.71 ± 6.45       | 3.95 ± 3.69       | 3.13 ± 2.85             |
| 26  | 100 ± 0         | 7.8 ± 7.53        | 3.1 ± 2.82        | 6.75 ± 6.51       | 3.98 ± 3.73       | 3.15 ± 2.87             |
| 27  | 100 ± 0         | 7.84 ± 7.58       | 3.11 ± 2.84       | 6.79 ± 6.56       | 3.99 ± 3.76       | 3.17 ± 2.9              |
| 28  | 100 ± 0         | 7.87 ± 7.6        | 3.1 ± 2.83        | 6.8 ± 6.56        | 3.99 ± 3.74       | 3.2 ± 2.94              |
| 29  | 100 ± 0         | 7.89 ± 7.61       | 3.09 ± 2.81       | 6.82 ± 6.56       | 3.98 ± 3.71       | 3.21 ± 2.94             |
| 30  | 100 ± 0         | 7.92 ± 7.61       | 3.09 ± 2.78       | 6.85 ± 6.55       | 4.01 ± 3.7        | 3.21 ± 2.93             |
| 31  | 100 ± 0         | 7.93 ± 7.62       | 3.07 ± 2.77       | 6.85 ± 6.58       | 3.99 ± 3.71       | 3.23 ± 2.92             |
| 32  | 100 ± 0         | 7.94 ± 7.64       | 3.06 ± 2.76       | 6.87 ± 6.59       | 3.98 ± 3.71       | 3.23 ± 2.92             |
| 33  | 100 ± 0         | 7.95 ± 7.63       | 3.04 ± 2.72       | 6.87 ± 6.56       | 3.98 ± 3.66       | 3.23 ± 2.92             |
| 34  | 100 ± 0         | 7.97 ± 7.64       | 3.03 ± 2.7        | 6.9 ± 6.59        | 4 ± 3.68          | 3.22 ± 2.9              |
| 35  | 100 ± 0         | 7.98 ± 7.63       | 3.02 ± 2.67       | 6.91 ± 6.57       | 3.99 ± 3.66       | 3.23 ± 2.9              |
| 36  | 100 ± 0         | 7.99 ± 7.66       | 3.01 ± 2.67       | 6.91 ± 6.62       | 3.98 ± 3.7        | 3.22 ± 2.88             |
| 37  | 100 ± 0         | 8 ± 7.65          | 2.99 ± 2.65       | 6.92 ± 6.59       | 3.98 ± 3.66       | 3.22 ± 2.89             |
| 38  | 100 ± 0         | 8 ± 7.66          | 2.97 ± 2.63       | 6.91 ± 6.6        | 3.96 ± 3.65       | 3.22 ± 2.87             |
| 39  | 100 ± 0         | 8 ± 7.65          | 2.95 ± 2.6        | 6.91 ± 6.6        | 3.95 ± 3.64       | 3.2 ± 2.86              |
| 40  | 100 ± 0         | 8 ± 7.65          | 2.93 ± 2.58       | 6.92 ± 6.6        | 3.95 ± 3.63       | 3.19 ± 2.85             |
| 41  | 100 ± 0         | 8.01 ± 7.66       | 2.91 ± 2.57       | 6.92 ± 6.63       | 3.95 ± 3.65       | 3.18 ± 2.83             |
| 42  | 100 ± 0         | 8.02 ± 7.68       | 2.9 ± 2.56        | 6.94 ± 6.63       | 3.95 ± 3.64       | 3.17 ± 2.83             |
| 43  | 100 ± 0         | 8.01 ± 7.66       | 2.88 ± 2.52       | 6.92 ± 6.6        | 3.93 ± 3.61       | 3.17 ± 2.83             |
| 44  | 100 ± 0         | 8.01 ± 7.66       | 2.86 ± 2.51       | 6.92 ± 6.62       | 3.94 ± 3.64       | 3.15 ± 2.8              |
| 45  | 100 ± 0         | 8.01 ± 7.66       | 2.84 ± 2.49       | 6.91 ± 6.61       | 3.92 ± 3.61       | 3.14 ± 2.79             |
| 46  | 100 ± 0         | 8.01 ± 7.67       | 2.82 ± 2.48       | 6.92 ± 6.63       | 3.92 ± 3.63       | 3.12 ± 2.78             |
| 47  | 100 ± 0         | 8 ± 7.64          | 2.8 ± 2.44        | 6.91 ± 6.58       | 3.91 ± 3.58       | 3.11 ± 2.77             |
| 48  | 100 ± 0         | 8 ± 7.63          | 2.78 ± 2.41       | 6.9 ± 6.56        | 3.89 ± 3.56       | 3.1 ± 2.74              |

The average of the prevalence, the CFU-values per square meter (cfu/sqm) and per gram manure are calculated over all iterations. The CFU values in the intestine as well as the excreted and ingested quantities are obtained by calculating the average over all animals in one iteration at first and then over all iterations. The decadic logarithm of zero or negative values is negative infinite (-Inf).

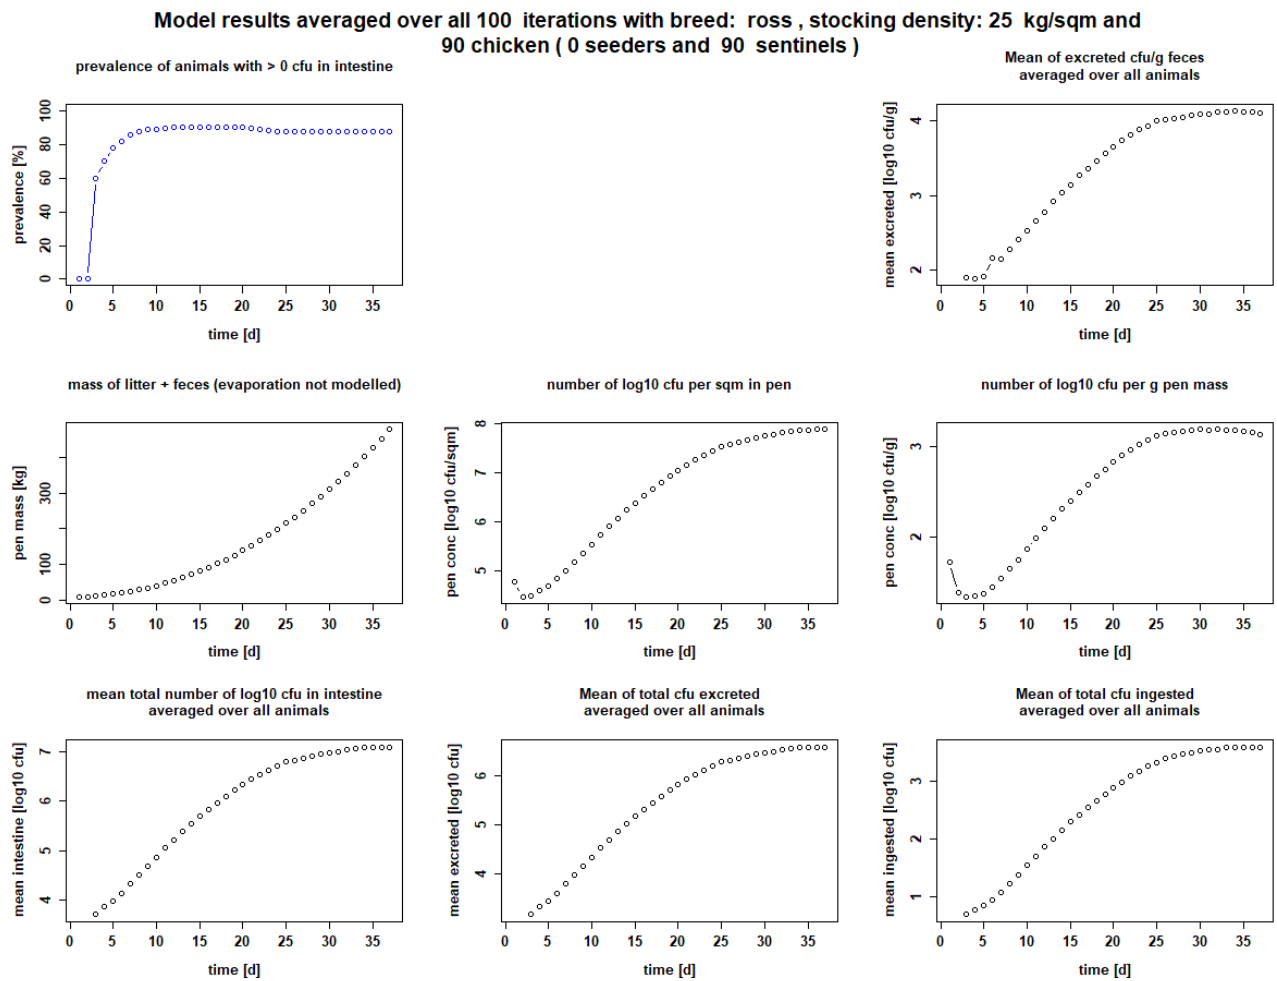

**Figure S23. Calculated infection dynamic for the scenario when the pen is contaminated with  $10^6$  CFU at the beginning of the fattening period, measure stocking density 25 kg/m<sup>2</sup>. Dotplots with results for 90 negative birds, Ross 308, feeding duration 36 days, stocking density 25 kg/m<sup>2</sup>, 1000 g litter/m<sup>2</sup>**

**Table S23a (CFU). Calculated numeric values for scenario when the pen is contaminated with  $10^6$  CFU at the beginning of the fattening period, measure stocking density 25 kg/m<sup>2</sup>. Setting: 90 negative birds, Ross 308, feeding duration 36 days, stocking density 25 kg/m<sup>2</sup>, 1000 g litter/m<sup>2</sup>**

| day | prevalence in %   | cfu/sqm           | cfu/g manure      | cfu in intestine  | cfu/g feces       | cfu ingested per animal |
|-----|-------------------|-------------------|-------------------|-------------------|-------------------|-------------------------|
|     | (mean $\pm$ sd)         |
| 1   | 0 $\pm$ 0         | 6e4 $\pm$ 0e4     | 5.4e1 $\pm$ 0e1   | 0e0 $\pm$ 0       | 0e0 $\pm$ 0       | 0e0 $\pm$ 0             |
| 2   | 0 $\pm$ 0         | 3e4 $\pm$ 0e4     | 2.5e1 $\pm$ 0e1   | 0e0 $\pm$ 0       | 0e0 $\pm$ 0       | 0e0 $\pm$ 0             |
| 3   | 60.03 $\pm$ 5.12  | 3.1e4 $\pm$ 0.5e4 | 2.2e1 $\pm$ 0.4e1 | 5.1e3 $\pm$ 1.6e3 | 7.9e1 $\pm$ 2.5e1 | 5 $\pm$ 0               |
| 4   | 70.44 $\pm$ 7.32  | 4e4 $\pm$ 1.1e4   | 2.3e1 $\pm$ 0.6e1 | 7.5e3 $\pm$ 2.8e3 | 7.5e1 $\pm$ 2.8e1 | 5.99 $\pm$ 1.1          |
| 5   | 78.08 $\pm$ 10.54 | 5e4 $\pm$ 1.7e4   | 2.4e1 $\pm$ 0.8e1 | 9.5e3 $\pm$ 4e3   | 8.1e1 $\pm$ 3.4e1 | 7.2 $\pm$ 2             |
| 6   | 82.36 $\pm$ 14.53 | 6.9e4 $\pm$ 3.4e4 | 2.8e1 $\pm$ 1.4e1 | 1.4e4 $\pm$ 0.8e4 | 1.4e2 $\pm$ 0.9e2 | 8.8 $\pm$ 3.2           |
| 7   | 85.83 $\pm$ 19.88 | 1e5 $\pm$ 0.7e5   | 3.5e1 $\pm$ 2.2e1 | 2.1e4 $\pm$ 1.5e4 | 1.4e2 $\pm$ 1e2   | 1.22e1 $\pm$ 0.6e1      |
| 8   | 87.83 $\pm$ 22.43 | 1.5e5 $\pm$ 1.1e5 | 4.5e1 $\pm$ 3.2e1 | 3.2e4 $\pm$ 2.5e4 | 1.9e2 $\pm$ 1.5e2 | 1.72e1 $\pm$ 1.1e1      |
| 9   | 88.96 $\pm$ 25.38 | 2.3e5 $\pm$ 1.9e5 | 5.7e1 $\pm$ 4.7e1 | 4.8e4 $\pm$ 4.4e4 | 2.5e2 $\pm$ 2.3e2 | 2.46e1 $\pm$ 1.8e1      |
| 10  | 89.09 $\pm$ 28.46 | 3.5e5 $\pm$ 3.1e5 | 7.4e1 $\pm$ 6.5e1 | 7.4e4 $\pm$ 6.8e4 | 3.3e2 $\pm$ 3.1e2 | 3.53e1 $\pm$ 3e1        |
| 11  | 89.86 $\pm$ 28.54 | 5.5e5 $\pm$ 5.1e5 | 9.8e1 $\pm$ 9.2e1 | 1.2e5 $\pm$ 1.1e5 | 4.6e2 $\pm$ 4.4e2 | 5.03e1 $\pm$ 4.5e1      |
| 12  | 90.33 $\pm$ 28.67 | 8.2e5 $\pm$ 7.5e5 | 1.3e2 $\pm$ 1.2e2 | 1.7e5 $\pm$ 1.6e5 | 6e2 $\pm$ 5.7e2   | 7.37e1 $\pm$ 6.9e1      |
| 13  | 90.4 $\pm$ 28.7   | 1.2e6 $\pm$ 1.1e6 | 1.6e2 $\pm$ 1.5e2 | 2.5e5 $\pm$ 2.4e5 | 8.2e2 $\pm$ 8e2   | 1.01e2 $\pm$ 0.9e2      |
| 14  | 90.42 $\pm$ 28.71 | 1.8e6 $\pm$ 1.7e6 | 2.1e2 $\pm$ 2e2   | 3.6e5 $\pm$ 3.5e5 | 1.1e3 $\pm$ 1.1e3 | 1.42e2 $\pm$ 1.3e2      |
| 15  | 90.57 $\pm$ 28.7  | 2.5e6 $\pm$ 2.5e6 | 2.5e2 $\pm$ 2.6e2 | 4.9e5 $\pm$ 5.2e5 | 1.4e3 $\pm$ 1.5e3 | 1.98e2 $\pm$ 1.9e2      |
| 16  | 90.64 $\pm$ 28.71 | 3.5e6 $\pm$ 3.5e6 | 3.2e2 $\pm$ 3.3e2 | 6.9e5 $\pm$ 7.3e5 | 1.9e3 $\pm$ 2e3   | 2.62e2 $\pm$ 2.7e2      |
| 17  | 90.51 $\pm$ 28.74 | 4.7e6 $\pm$ 4.5e6 | 3.9e2 $\pm$ 3.7e2 | 9.2e5 $\pm$ 8.8e5 | 2.3e3 $\pm$ 2.2e3 | 3.52e2 $\pm$ 3.6e2      |
| 18  | 90.5 $\pm$ 28.76  | 6.4e6 $\pm$ 6.5e6 | 4.7e2 $\pm$ 4.8e2 | 1.3e6 $\pm$ 1.3e6 | 2.9e3 $\pm$ 3.1e3 | 4.6e2 $\pm$ 4.4e2       |
| 19  | 90.46 $\pm$ 28.84 | 8.5e6 $\pm$ 8.9e6 | 5.7e2 $\pm$ 5.9e2 | 1.7e6 $\pm$ 1.8e6 | 3.6e3 $\pm$ 3.9e3 | 5.95e2 $\pm$ 6e2        |
| 20  | 90.26 $\pm$ 29    | 1.1e7 $\pm$ 1.2e7 | 6.8e2 $\pm$ 7.1e2 | 2.2e6 $\pm$ 2.3e6 | 4.5e3 $\pm$ 4.8e3 | 7.64e2 $\pm$ 7.9e2      |
| 21  | 89.86 $\pm$ 29.38 | 1.5e7 $\pm$ 1.5e7 | 8.1e2 $\pm$ 8.4e2 | 2.8e6 $\pm$ 3e6   | 5.6e3 $\pm$ 5.9e3 | 9.69e2 $\pm$ 10.1e2     |
| 22  | 89.39 $\pm$ 30.27 | 1.9e7 $\pm$ 1.9e7 | 9.3e2 $\pm$ 9.8e2 | 3.5e6 $\pm$ 3.7e6 | 6.6e3 $\pm$ 7.1e3 | 1.22e3 $\pm$ 1.3e3      |
| 23  | 88.77 $\pm$ 31    | 2.3e7 $\pm$ 2.4e7 | 1.1e3 $\pm$ 1.1e3 | 4.3e6 $\pm$ 4.4e6 | 7.6e3 $\pm$ 7.9e3 | 1.49e3 $\pm$ 1.6e3      |
| 24  | 88 $\pm$ 32.66    | 2.8e7 $\pm$ 2.7e7 | 1.2e3 $\pm$ 1.2e3 | 5.1e6 $\pm$ 5e6   | 8.5e3 $\pm$ 8.2e3 | 1.78e3 $\pm$ 1.8e3      |
| 25  | 88 $\pm$ 32.66    | 3.4e7 $\pm$ 3.2e7 | 1.3e3 $\pm$ 1.3e3 | 6.3e6 $\pm$ 6e6   | 1e4 $\pm$ 1e4     | 2.07e3 $\pm$ 2e3        |
| 26  | 88 $\pm$ 32.66    | 3.8e7 $\pm$ 3.5e7 | 1.4e3 $\pm$ 1.3e3 | 6.7e6 $\pm$ 6e6   | 1e4 $\pm$ 0.9e4   | 2.44e3 $\pm$ 2.3e3      |
| 27  | 88 $\pm$ 32.66    | 4.3e7 $\pm$ 3.7e7 | 1.4e3 $\pm$ 1.2e3 | 7.3e6 $\pm$ 6.2e6 | 1.1e4 $\pm$ 0.9e4 | 2.66e3 $\pm$ 2.4e3      |
| 28  | 88 $\pm$ 32.66    | 4.7e7 $\pm$ 4e7   | 1.5e3 $\pm$ 1.2e3 | 8.1e6 $\pm$ 6.8e6 | 1.1e4 $\pm$ 1e4   | 2.87e3 $\pm$ 2.5e3      |
| 29  | 88 $\pm$ 32.66    | 5.3e7 $\pm$ 4.2e7 | 1.5e3 $\pm$ 1.2e3 | 9.1e6 $\pm$ 7.1e6 | 1.2e4 $\pm$ 0.9e4 | 3.07e3 $\pm$ 2.6e3      |
| 30  | 88 $\pm$ 32.66    | 5.8e7 $\pm$ 4.4e7 | 1.6e3 $\pm$ 1.2e3 | 9.7e6 $\pm$ 7.4e6 | 1.3e4 $\pm$ 1e4   | 3.31e3 $\pm$ 2.6e3      |
| 31  | 88 $\pm$ 32.66    | 6.1e7 $\pm$ 4.3e7 | 1.5e3 $\pm$ 1.1e3 | 10e6 $\pm$ 6.9e6  | 1.2e4 $\pm$ 0.9e4 | 3.48e3 $\pm$ 2.7e3      |
| 32  | 88 $\pm$ 32.66    | 6.7e7 $\pm$ 4.6e7 | 1.6e3 $\pm$ 1.1e3 | 1.1e7 $\pm$ 0.8e7 | 1.3e4 $\pm$ 0.9e4 | 3.55e3 $\pm$ 2.5e3      |
| 33  | 88 $\pm$ 32.66    | 7e7 $\pm$ 4.6e7   | 1.5e3 $\pm$ 1e3   | 1.1e7 $\pm$ 0.8e7 | 1.3e4 $\pm$ 0.9e4 | 3.74e3 $\pm$ 2.6e3      |
| 34  | 88 $\pm$ 32.66    | 7.3e7 $\pm$ 4.7e7 | 1.5e3 $\pm$ 1e3   | 1.2e7 $\pm$ 0.8e7 | 1.4e4 $\pm$ 0.9e4 | 3.8e3 $\pm$ 2.5e3       |
| 35  | 88 $\pm$ 32.66    | 7.6e7 $\pm$ 4.7e7 | 1.5e3 $\pm$ 0.9e3 | 1.2e7 $\pm$ 0.8e7 | 1.3e4 $\pm$ 0.8e4 | 3.86e3 $\pm$ 2.5e3      |
| 36  | 88 $\pm$ 32.66    | 7.8e7 $\pm$ 4.7e7 | 1.4e3 $\pm$ 0.9e3 | 1.2e7 $\pm$ 0.8e7 | 1.3e4 $\pm$ 0.8e4 | 3.85e3 $\pm$ 2.4e3      |
| 37  | 88 $\pm$ 32.66    | 7.9e7 $\pm$ 4.7e7 | 1.4e3 $\pm$ 0.8e3 | 1.3e7 $\pm$ 0.8e7 | 1.3e4 $\pm$ 0.8e4 | 3.81e3 $\pm$ 2.3e3      |

The average of the prevalence, the CFU-values per square meter (cfu/sqm) and per gram manure are calculated over all iterations. The CFU values in the intestine as well as the excreted and ingested quantities are obtained by calculating the average over all animals in one iteration at first and then over all iterations.

**Table S23b (log<sub>10</sub> CFU). Calculated numeric values for scenario when the pen is contaminated with 10<sup>6</sup> CFU at the beginning of the fattening period, measure stocking density 25 kg/m<sup>2</sup>.**

Setting: 90 negative birds, Ross 308, feeding duration 36 days, stocking density 25 kg/m<sup>2</sup>, 1000 g litter/m<sup>2</sup>

| day | prevalence in % | cfu/sqm           | cfu/g manure      | cfu in intestine  | cfu/g feces       | cfu ingested per animal |
|-----|-----------------|-------------------|-------------------|-------------------|-------------------|-------------------------|
|     | (% mean ± sd)   | (log10 mean ± sd) | (log10 mean ± sd) | (log10 mean ± sd) | (log10 mean ± sd) | (log10 mean ± sd)       |
| 1   | 0 ± 0           | 4.77 ± -Inf       | 1.73 ± -Inf       | -Inf ± -Inf       | -Inf ± -Inf       | -Inf ± 0                |
| 2   | 0 ± 0           | 4.47 ± -Inf       | 1.39 ± -Inf       | -Inf ± -Inf       | -Inf ± -Inf       | -Inf ± 0                |
| 3   | 60.03 ± 5.12    | 4.5 ± 3.71        | 1.34 ± 0.56       | 3.71 ± 3.2        | 1.9 ± 1.39        | 0.7 ± 0                 |
| 4   | 70.44 ± 7.32    | 4.6 ± 4.03        | 1.36 ± 0.78       | 3.88 ± 3.45       | 1.87 ± 1.44       | 0.78 ± 0.04             |
| 5   | 78.08 ± 10.54   | 4.7 ± 4.23        | 1.38 ± 0.9        | 3.98 ± 3.6        | 1.91 ± 1.53       | 0.86 ± 0.31             |
| 6   | 82.36 ± 14.53   | 4.84 ± 4.53       | 1.45 ± 1.15       | 4.13 ± 3.91       | 2.15 ± 1.93       | 0.94 ± 0.5              |
| 7   | 85.83 ± 19.88   | 5.01 ± 4.81       | 1.54 ± 1.35       | 4.32 ± 4.19       | 2.14 ± 2.01       | 1.09 ± 0.8              |
| 8   | 87.83 ± 22.43   | 5.19 ± 5.04       | 1.65 ± 1.51       | 4.51 ± 4.4        | 2.28 ± 2.17       | 1.24 ± 1.05             |
| 9   | 88.96 ± 25.38   | 5.36 ± 5.28       | 1.75 ± 1.68       | 4.68 ± 4.64       | 2.4 ± 2.37        | 1.39 ± 1.25             |
| 10  | 89.09 ± 28.46   | 5.55 ± 5.49       | 1.87 ± 1.81       | 4.87 ± 4.83       | 2.52 ± 2.49       | 1.55 ± 1.48             |
| 11  | 89.86 ± 28.54   | 5.74 ± 5.71       | 1.99 ± 1.96       | 5.06 ± 5.05       | 2.66 ± 2.65       | 1.7 ± 1.65              |
| 12  | 90.33 ± 28.67   | 5.91 ± 5.88       | 2.1 ± 2.06        | 5.23 ± 5.2        | 2.78 ± 2.75       | 1.87 ± 1.84             |
| 13  | 90.4 ± 28.7     | 6.08 ± 6.06       | 2.21 ± 2.18       | 5.39 ± 5.38       | 2.92 ± 2.9        | 2.01 ± 1.97             |
| 14  | 90.42 ± 28.71   | 6.24 ± 6.23       | 2.31 ± 2.3        | 5.55 ± 5.55       | 3.04 ± 3.03       | 2.15 ± 2.13             |
| 15  | 90.57 ± 28.7    | 6.39 ± 6.4        | 2.4 ± 2.41        | 5.69 ± 5.72       | 3.14 ± 3.17       | 2.3 ± 2.28              |
| 16  | 90.64 ± 28.71   | 6.54 ± 6.55       | 2.5 ± 2.51        | 5.84 ± 5.86       | 3.27 ± 3.3        | 2.42 ± 2.43             |
| 17  | 90.51 ± 28.74   | 6.67 ± 6.65       | 2.59 ± 2.57       | 5.97 ± 5.94       | 3.36 ± 3.34       | 2.55 ± 2.56             |
| 18  | 90.5 ± 28.76    | 6.81 ± 6.81       | 2.67 ± 2.68       | 6.1 ± 6.13        | 3.46 ± 3.49       | 2.66 ± 2.64             |
| 19  | 90.46 ± 28.84   | 6.93 ± 6.95       | 2.75 ± 2.77       | 6.22 ± 6.25       | 3.56 ± 3.59       | 2.77 ± 2.78             |
| 20  | 90.26 ± 29      | 7.05 ± 7.07       | 2.83 ± 2.85       | 6.34 ± 6.36       | 3.66 ± 3.68       | 2.88 ± 2.9              |
| 21  | 89.86 ± 29.38   | 7.17 ± 7.19       | 2.91 ± 2.93       | 6.45 ± 6.48       | 3.75 ± 3.77       | 2.99 ± 3                |
| 22  | 89.39 ± 30.27   | 7.27 ± 7.29       | 2.97 ± 2.99       | 6.54 ± 6.57       | 3.82 ± 3.85       | 3.09 ± 3.11             |
| 23  | 88.77 ± 31      | 7.36 ± 7.37       | 3.03 ± 3.04       | 6.63 ± 6.64       | 3.88 ± 3.9        | 3.17 ± 3.19             |
| 24  | 88 ± 32.66      | 7.45 ± 7.44       | 3.07 ± 3.06       | 6.71 ± 6.7        | 3.93 ± 3.91       | 3.25 ± 3.26             |
| 25  | 88 ± 32.66      | 7.53 ± 7.51       | 3.12 ± 3.1        | 6.8 ± 6.78        | 4 ± 3.98          | 3.32 ± 3.31             |
| 26  | 88 ± 32.66      | 7.59 ± 7.54       | 3.14 ± 3.1        | 6.82 ± 6.78       | 4.02 ± 3.97       | 3.39 ± 3.37             |
| 27  | 88 ± 32.66      | 7.63 ± 7.56       | 3.16 ± 3.09       | 6.87 ± 6.79       | 4.03 ± 3.96       | 3.43 ± 3.38             |
| 28  | 88 ± 32.66      | 7.68 ± 7.6        | 3.17 ± 3.09       | 6.91 ± 6.83       | 4.05 ± 3.98       | 3.46 ± 3.39             |
| 29  | 88 ± 32.66      | 7.72 ± 7.63       | 3.19 ± 3.09       | 6.96 ± 6.85       | 4.08 ± 3.98       | 3.49 ± 3.41             |
| 30  | 88 ± 32.66      | 7.76 ± 7.65       | 3.19 ± 3.08       | 6.98 ± 6.87       | 4.1 ± 3.98        | 3.52 ± 3.42             |
| 31  | 88 ± 32.66      | 7.78 ± 7.63       | 3.19 ± 3.04       | 7 ± 6.84          | 4.09 ± 3.93       | 3.54 ± 3.43             |
| 32  | 88 ± 32.66      | 7.82 ± 7.66       | 3.2 ± 3.04        | 7.05 ± 6.9        | 4.13 ± 3.97       | 3.55 ± 3.4              |
| 33  | 88 ± 32.66      | 7.84 ± 7.67       | 3.19 ± 3.01       | 7.06 ± 6.88       | 4.12 ± 3.94       | 3.57 ± 3.41             |
| 34  | 88 ± 32.66      | 7.87 ± 7.67       | 3.19 ± 2.99       | 7.08 ± 6.89       | 4.13 ± 3.95       | 3.58 ± 3.4              |
| 35  | 88 ± 32.66      | 7.88 ± 7.67       | 3.17 ± 2.96       | 7.08 ± 6.88       | 4.12 ± 3.92       | 3.59 ± 3.39             |
| 36  | 88 ± 32.66      | 7.89 ± 7.68       | 3.16 ± 2.94       | 7.09 ± 6.89       | 4.12 ± 3.91       | 3.59 ± 3.38             |
| 37  | 88 ± 32.66      | 7.9 ± 7.67        | 3.14 ± 2.92       | 7.1 ± 6.88        | 4.11 ± 3.89       | 3.58 ± 3.37             |

The average of the prevalence, the CFU-values per square meter (cfu/sqm) and per gram manure are calculated over all iterations. The CFU values in the intestine as well as the excreted and ingested quantities are obtained by calculating the average over all animals in one iteration at first and then over all iterations. The decadic logarithm of zero or negative values is negative infinite (-Inf).

Model results averaged over all 100 iterations with breed: ross , stocking density: 20 kg/sqm and 90 chicken ( 0 seeders and 90 sentinels )

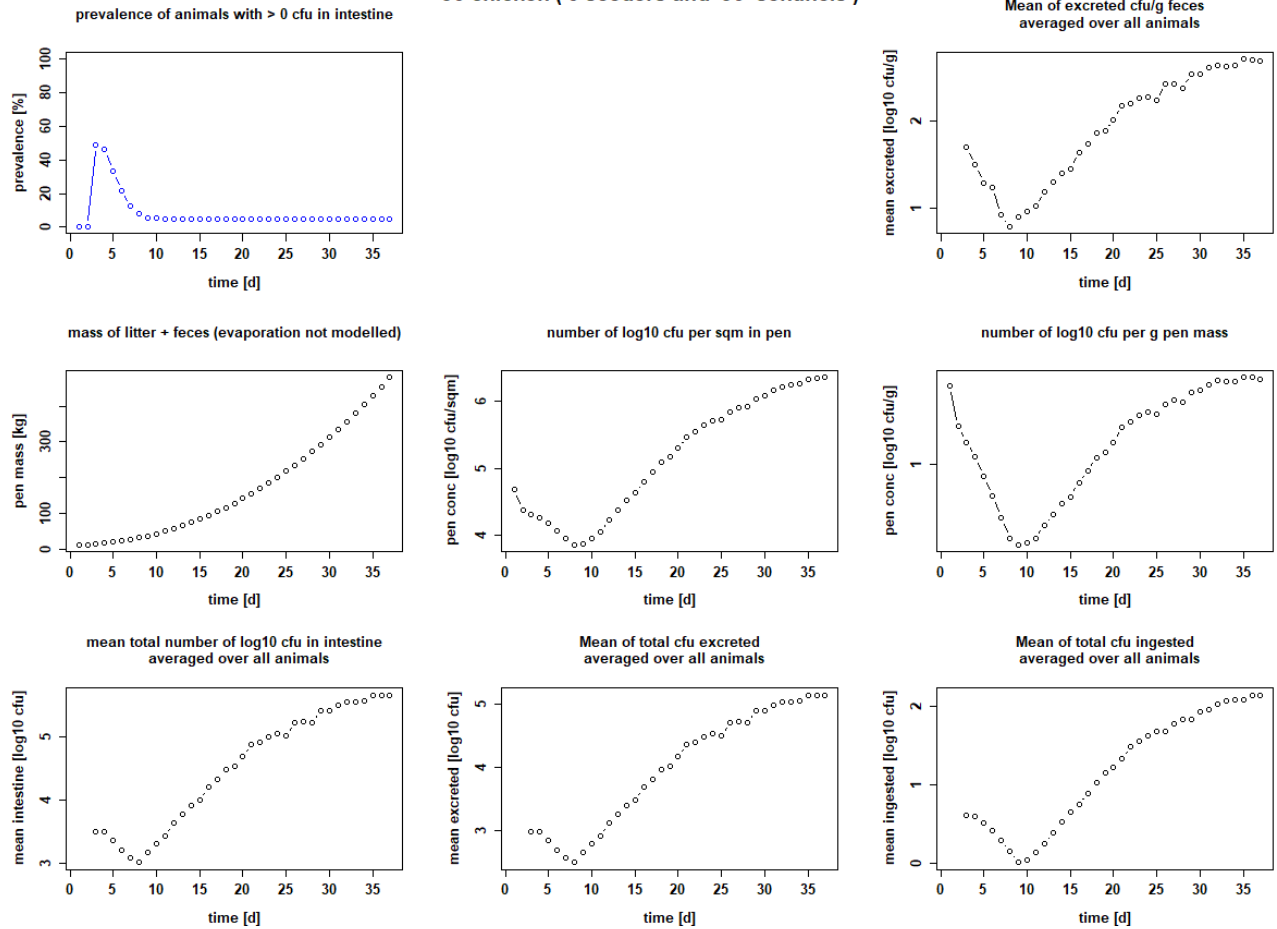

**Figure S24.** Calculated infection dynamic for the scenario when the pen is contaminated with  $10^6$  CFU at the beginning of the fattening period, measure stocking density  $20 \text{ kg/m}^2$ . Dotplots with results for 90 negative birds, Ross 308, feeding duration 36 days, stocking density  $20 \text{ kg/m}^2$ ,  $1000 \text{ g litter/m}^2$

**Table S24a (CFU). Calculated numeric values for scenario when the pen is contaminated with  $10^6$  CFU at the beginning of the fattening period, measure stocking density 20 kg/m<sup>2</sup>. Setting: 90 negative birds, Ross 308, feeding duration 36 days, stocking density 20 kg/m<sup>2</sup>, 1000 g litter/m<sup>2</sup>**

| day | prevalence in % | cfu/sqm        | cfu/g manure   | cfu in intestine | cfu/g feces    | cfu ingested per animal |
|-----|-----------------|----------------|----------------|------------------|----------------|-------------------------|
|     | (mean ± sd)     | (mean ± sd)    | (mean ± sd)    | (mean ± sd)      | (mean ± sd)    | (mean ± sd)             |
| 1   | 0 ± 0           | 4.8e4 ± 0e4    | 4.4e1 ± 0e1    | 0e0 ± 0          | 0e0 ± 0        | 0e0 ± 0                 |
| 2   | 0 ± 0           | 2.4e4 ± 0e4    | 2e1 ± 0e1      | 0e0 ± 0          | 0e0 ± 0        | 0e0 ± 0                 |
| 3   | 49.28 ± 5.21    | 2e4 ± 0.3e4    | 1.5e1 ± 0.2e1  | 3.2e3 ± 1e3      | 4.9e1 ± 1.5e1  | 4 ± 0                   |
| 4   | 46.44 ± 9.85    | 1.8e4 ± 0.5e4  | 1.1e1 ± 0.3e1  | 3.1e3 ± 1.5e3    | 3.1e1 ± 1.5e1  | 3.89 ± 0.6              |
| 5   | 33.54 ± 21.38   | 1.5e4 ± 0.7e4  | 7.9 ± 3.7      | 2.3e3 ± 1.9e3    | 1.9e1 ± 1.6e1  | 3.28 ± 1                |
| 6   | 21.68 ± 23.86   | 1.2e4 ± 1e4    | 5.4 ± 4.6      | 1.6e3 ± 2.7e3    | 1.7e1 ± 2.8e1  | 2.59 ± 1.4              |
| 7   | 12.39 ± 23.23   | 9e3 ± 13.4e3   | 3.6 ± 5.3      | 1.3e3 ± 3.4e3    | 8.3 ± 22.5     | 1.92 ± 2.1              |
| 8   | 8.17 ± 22.24    | 7.2e3 ± 16.7e3 | 2.4 ± 5.6      | 1e3 ± 4e3        | 6.1 ± 23.6     | 1.39 ± 2.6              |
| 9   | 5.54 ± 20.99    | 7.4e3 ± 26.8e3 | 2.2 ± 7.8      | 1.5e3 ± 7.3e3    | 7.9 ± 38.5     | 1.01 ± 3.1              |
| 10  | 5.24 ± 21.61    | 8.9e3 ± 39.7e3 | 2.2 ± 9.9      | 2e3 ± 10.3e3     | 9.1 ± 46.1     | 1.08 ± 4.8              |
| 11  | 4.84 ± 21.23    | 1.1e4 ± 5.4e4  | 2.4 ± 11.6     | 2.7e3 ± 13.4e3   | 1.1e1 ± 5.3e1  | 1.36 ± 6.7              |
| 12  | 4.92 ± 21.57    | 1.7e4 ± 8.4e4  | 3.1 ± 15.6     | 4.3e3 ± 22.3e3   | 1.5e1 ± 8e1    | 1.74 ± 8.7              |
| 13  | 5 ± 21.9        | 2.4e4 ± 12.7e4 | 3.9 ± 20.6     | 6e3 ± 33.1e3     | 2e1 ± 11e1     | 2.45 ± 12.6             |
| 14  | 4.97 ± 21.76    | 3.3e4 ± 17.8e4 | 4.7 ± 25.3     | 8.1e3 ± 44.4e3   | 2.5e1 ± 13.5e1 | 3.35 ± 18               |
| 15  | 5 ± 21.9        | 4.2e4 ± 22.1e4 | 5.4 ± 27.8     | 1e4 ± 5.2e4      | 2.8e1 ± 14.7e1 | 4.48 ± 24.3             |
| 16  | 5 ± 21.9        | 6.2e4 ± 33.9e4 | 7 ± 38.2       | 1.6e4 ± 9e4      | 4.3e1 ± 24.5e1 | 5.52 ± 28.8             |
| 17  | 5 ± 21.9        | 8.7e4 ± 52.7e4 | 8.8 ± 53.1     | 2.2e4 ± 14e4     | 5.4e1 ± 34.6e1 | 7.73 ± 42.2             |
| 18  | 5 ± 21.9        | 1.2e5 ± 7.6e5  | 1.1e1 ± 6.9e1  | 3.1e4 ± 19.3e4   | 7.1e1 ± 44.4e1 | 1.04e1 ± 6.3e1          |
| 19  | 5 ± 21.9        | 1.5e5 ± 9.1e5  | 1.2e1 ± 7.5e1  | 3.5e4 ± 20.8e4   | 7.6e1 ± 45.6e1 | 1.41e1 ± 8.7e1          |
| 20  | 5 ± 21.9        | 2e5 ± 12.5e5   | 1.5e1 ± 9.3e1  | 4.9e4 ± 31.1e4   | 1e2 ± 6.5e2    | 1.66e1 ± 10e1           |
| 21  | 5 ± 21.9        | 3e5 ± 20.5e5   | 2e1 ± 13.9e1   | 7.6e4 ± 55.5e4   | 1.5e2 ± 10.9e2 | 2.14e1 ± 13.3e1         |
| 22  | 5 ± 21.9        | 3.6e5 ± 23.9e5 | 2.2e1 ± 14.8e1 | 8.2e4 ± 53.2e4   | 1.6e2 ± 10.1e2 | 3.04e1 ± 21e1           |
| 23  | 5 ± 21.9        | 4.4e5 ± 29.7e5 | 2.5e1 ± 16.9e1 | 1e5 ± 6.9e5      | 1.8e2 ± 12.3e2 | 3.55e1 ± 23.7e1         |
| 24  | 5 ± 21.9        | 5.1e5 ± 34.4e5 | 2.7e1 ± 18e1   | 1.1e5 ± 7.6e5    | 1.9e2 ± 12.6e2 | 4.22e1 ± 28.4e1         |
| 25  | 5 ± 21.9        | 5.3e5 ± 33.5e5 | 2.5e1 ± 16.2e1 | 1.1e5 ± 6.4e5    | 1.7e2 ± 10.2e2 | 4.69e1 ± 31.6e1         |
| 26  | 5 ± 21.9        | 7e5 ± 42.4e5   | 3.1e1 ± 19e1   | 1.7e5 ± 10e5     | 2.6e2 ± 15.7e2 | 4.67e1 ± 29.7e1         |
| 27  | 5 ± 21.9        | 8.1e5 ± 47.7e5 | 3.4e1 ± 19.8e1 | 1.8e5 ± 10.3e5   | 2.6e2 ± 15.2e2 | 5.98e1 ± 36.4e1         |
| 28  | 5 ± 21.9        | 8.3e5 ± 49e5   | 3.2e1 ± 18.9e1 | 1.7e5 ± 9.8e5    | 2.3e2 ± 13.8e2 | 6.71e1 ± 39.6e1         |
| 29  | 5 ± 21.9        | 1.1e6 ± 6.3e6  | 3.9e1 ± 22.5e1 | 2.6e5 ± 14.9e5   | 3.4e2 ± 19.7e2 | 6.72e1 ± 39.4e1         |
| 30  | 5 ± 21.9        | 1.2e6 ± 6.9e6  | 4.1e1 ± 23.1e1 | 2.6e5 ± 14.7e5   | 3.4e2 ± 19.2e2 | 8.39e1 ± 48.5e1         |
| 31  | 5 ± 21.9        | 1.4e6 ± 8.5e6  | 4.5e1 ± 26.8e1 | 3.3e5 ± 19.8e5   | 4.1e2 ± 24.7e2 | 9.08e1 ± 51.8e1         |
| 32  | 5 ± 21.9        | 1.6e6 ± 9.5e6  | 4.8e1 ± 28e1   | 3.6e5 ± 20.5e5   | 4.3e2 ± 24.4e2 | 1.04e2 ± 6.2e2          |
| 33  | 5 ± 21.9        | 1.7e6 ± 10.2e6 | 4.8e1 ± 28e1   | 3.6e5 ± 21.1e5   | 4.1e2 ± 24.2e2 | 1.15e2 ± 6.7e2          |
| 34  | 5 ± 21.9        | 1.8e6 ± 10e6   | 4.8e1 ± 26e1   | 3.8e5 ± 19.4e5   | 4.3e2 ± 21.9e2 | 1.18e2 ± 6.9e2          |
| 35  | 5 ± 21.9        | 2.1e6 ± 11.4e6 | 5.1e1 ± 27.9e1 | 4.6e5 ± 25.1e5   | 5e2 ± 27.2e2   | 1.2e2 ± 6.5e2           |
| 36  | 5 ± 21.9        | 2.2e6 ± 11.7e6 | 5.2e1 ± 26.9e1 | 4.6e5 ± 23.7e5   | 4.9e2 ± 25.2e2 | 1.33e2 ± 7.2e2          |
| 37  | 5 ± 21.9        | 2.3e6 ± 12.2e6 | 5e1 ± 26.5e1   | 4.6e5 ± 24.6e5   | 4.8e2 ± 25.5e2 | 1.37e2 ± 7.1e2          |

The average of the prevalence, the CFU-values per square meter (cfu/sqm) and per gram manure are calculated over all iterations. The CFU values in the intestine as well as the excreted and ingested quantities are obtained by calculating the average over all animals in one iteration at first and then over all iterations.

**Table S24b (log<sub>10</sub> CFU). Calculated numeric values for scenario when the pen is contaminated with 10<sup>6</sup> CFU at the beginning of the fattening period, measure stocking density 20 kg/m<sup>2</sup>.**

Setting: 90 negative birds, Ross 308, feeding duration 36 days, stocking density 20 kg/m<sup>2</sup>, 1000 g litter/m<sup>2</sup>

| day | prevalence in % | cfu/sqm           | cfu/g manure      | cfu in intestine  | cfu/g feces       | cfu ingested per animal |
|-----|-----------------|-------------------|-------------------|-------------------|-------------------|-------------------------|
|     | (% mean ± sd)   | (log10 mean ± sd) | (log10 mean ± sd) | (log10 mean ± sd) | (log10 mean ± sd) | (log10 mean ± sd)       |
| 1   | 0 ± 0           | 4.68 ± -Inf       | 1.64 ± -Inf       | -Inf ± -Inf       | -Inf ± -Inf       | -Inf ± 0                |
| 2   | 0 ± 0           | 4.38 ± -Inf       | 1.31 ± -Inf       | -Inf ± -Inf       | -Inf ± -Inf       | -Inf ± 0                |
| 3   | 49.28 ± 5.21    | 4.3 ± 3.41        | 1.18 ± 0.28       | 3.5 ± 3           | 1.69 ± 1.19       | 0.6 ± 0                 |
| 4   | 46.44 ± 9.85    | 4.26 ± 3.67       | 1.05 ± 0.47       | 3.5 ± 3.17        | 1.49 ± 1.17       | 0.59 ± -0.22            |
| 5   | 33.54 ± 21.38   | 4.17 ± 3.84       | 0.9 ± 0.56        | 3.36 ± 3.28       | 1.29 ± 1.21       | 0.52 ± 0                |
| 6   | 21.68 ± 23.86   | 4.07 ± 4          | 0.74 ± 0.67       | 3.21 ± 3.43       | 1.23 ± 1.45       | 0.41 ± 0.15             |
| 7   | 12.39 ± 23.23   | 3.96 ± 4.13       | 0.55 ± 0.72       | 3.1 ± 3.53        | 0.92 ± 1.35       | 0.28 ± 0.32             |
| 8   | 8.17 ± 22.24    | 3.86 ± 4.22       | 0.38 ± 0.75       | 3.01 ± 3.6        | 0.78 ± 1.37       | 0.14 ± 0.42             |
| 9   | 5.54 ± 20.99    | 3.87 ± 4.43       | 0.33 ± 0.89       | 3.17 ± 3.86       | 0.9 ± 1.58        | 0 ± 0.5                 |
| 10  | 5.24 ± 21.61    | 3.95 ± 4.6        | 0.35 ± 0.99       | 3.31 ± 4.01       | 0.96 ± 1.66       | 0.03 ± 0.68             |
| 11  | 4.84 ± 21.23    | 4.06 ± 4.73       | 0.39 ± 1.06       | 3.43 ± 4.13       | 1.02 ± 1.72       | 0.13 ± 0.83             |
| 12  | 4.92 ± 21.57    | 4.22 ± 4.93       | 0.49 ± 1.19       | 3.63 ± 4.35       | 1.19 ± 1.9        | 0.24 ± 0.94             |
| 13  | 5 ± 21.9        | 4.38 ± 5.1        | 0.59 ± 1.31       | 3.78 ± 4.52       | 1.3 ± 2.04        | 0.39 ± 1.1              |
| 14  | 4.97 ± 21.76    | 4.52 ± 5.25       | 0.67 ± 1.4        | 3.91 ± 4.65       | 1.39 ± 2.13       | 0.53 ± 1.26             |
| 15  | 5 ± 21.9        | 4.63 ± 5.34       | 0.73 ± 1.44       | 4.01 ± 4.72       | 1.45 ± 2.17       | 0.65 ± 1.39             |
| 16  | 5 ± 21.9        | 4.79 ± 5.53       | 0.85 ± 1.58       | 4.2 ± 4.96        | 1.64 ± 2.39       | 0.74 ± 1.46             |
| 17  | 5 ± 21.9        | 4.94 ± 5.72       | 0.94 ± 1.73       | 4.34 ± 5.15       | 1.73 ± 2.54       | 0.89 ± 1.63             |
| 18  | 5 ± 21.9        | 5.09 ± 5.88       | 1.05 ± 1.84       | 4.49 ± 5.29       | 1.85 ± 2.65       | 1.02 ± 1.8              |
| 19  | 5 ± 21.9        | 5.18 ± 5.96       | 1.09 ± 1.87       | 4.54 ± 5.32       | 1.88 ± 2.66       | 1.15 ± 1.94             |
| 20  | 5 ± 21.9        | 5.31 ± 6.1        | 1.18 ± 1.97       | 4.69 ± 5.49       | 2.01 ± 2.81       | 1.22 ± 2                |
| 21  | 5 ± 21.9        | 5.47 ± 6.31       | 1.3 ± 2.14        | 4.88 ± 5.74       | 2.17 ± 3.04       | 1.33 ± 2.12             |
| 22  | 5 ± 21.9        | 5.56 ± 6.38       | 1.35 ± 2.17       | 4.91 ± 5.73       | 2.19 ± 3          | 1.48 ± 2.32             |
| 23  | 5 ± 21.9        | 5.64 ± 6.47       | 1.4 ± 2.23        | 5.01 ± 5.84       | 2.26 ± 3.09       | 1.55 ± 2.37             |
| 24  | 5 ± 21.9        | 5.71 ± 6.54       | 1.43 ± 2.26       | 5.05 ± 5.88       | 2.27 ± 3.1        | 1.63 ± 2.45             |
| 25  | 5 ± 21.9        | 5.72 ± 6.53       | 1.41 ± 2.21       | 5.02 ± 5.81       | 2.23 ± 3.01       | 1.67 ± 2.5              |
| 26  | 5 ± 21.9        | 5.84 ± 6.63       | 1.49 ± 2.28       | 5.23 ± 6          | 2.42 ± 3.2        | 1.67 ± 2.47             |
| 27  | 5 ± 21.9        | 5.91 ± 6.68       | 1.53 ± 2.3        | 5.25 ± 6.01       | 2.42 ± 3.18       | 1.78 ± 2.56             |
| 28  | 5 ± 21.9        | 5.92 ± 6.69       | 1.51 ± 2.28       | 5.22 ± 5.99       | 2.37 ± 3.14       | 1.83 ± 2.6              |
| 29  | 5 ± 21.9        | 6.04 ± 6.8        | 1.59 ± 2.35       | 5.41 ± 6.17       | 2.54 ± 3.29       | 1.83 ± 2.6              |
| 30  | 5 ± 21.9        | 6.08 ± 6.84       | 1.61 ± 2.36       | 5.41 ± 6.17       | 2.53 ± 3.28       | 1.92 ± 2.69             |
| 31  | 5 ± 21.9        | 6.16 ± 6.93       | 1.66 ± 2.43       | 5.51 ± 6.3        | 2.61 ± 3.39       | 1.96 ± 2.71             |
| 32  | 5 ± 21.9        | 6.22 ± 6.98       | 1.68 ± 2.45       | 5.56 ± 6.31       | 2.63 ± 3.39       | 2.02 ± 2.79             |
| 33  | 5 ± 21.9        | 6.24 ± 7.01       | 1.68 ± 2.45       | 5.55 ± 6.32       | 2.61 ± 3.38       | 2.06 ± 2.82             |
| 34  | 5 ± 21.9        | 6.26 ± 7          | 1.68 ± 2.41       | 5.58 ± 6.29       | 2.63 ± 3.34       | 2.07 ± 2.84             |
| 35  | 5 ± 21.9        | 6.32 ± 7.06       | 1.71 ± 2.45       | 5.66 ± 6.4        | 2.7 ± 3.43        | 2.08 ± 2.82             |
| 36  | 5 ± 21.9        | 6.35 ± 7.07       | 1.71 ± 2.43       | 5.67 ± 6.38       | 2.69 ± 3.4        | 2.12 ± 2.86             |
| 37  | 5 ± 21.9        | 6.36 ± 7.08       | 1.7 ± 2.42        | 5.66 ± 6.39       | 2.68 ± 3.41       | 2.14 ± 2.85             |

The average of the prevalence, the CFU-values per square meter (cfu/sqm) and per gram manure are calculated over all iterations. The CFU values in the intestine as well as the excreted and ingested quantities are obtained by calculating the average over all animals in one iteration at first and then over all iterations. The decadic logarithm of zero or negative values is negative infinite (-Inf).





**Figure S25. Calculated infection dynamic for the scenario when the pen is contaminated with  $10^6$  CFU at the beginning of the fattening period, combined measure stocking density  $25 \text{ kg/m}^2$  and  $3000 \text{ g litter/m}^2$ . Dotplots with results for 90 negative birds, Ross 308, feeding duration 36 days, stocking density  $25 \text{ kg/m}^2$ ,  $3000 \text{ g litter/m}^2$  (no infection of birds, thus no plots).**

**Table S25a (CFU). Calculated numeric values for scenario when the pen is contaminated with  $10^6$  CFU at the beginning of the fattening period, combined measure stocking density 25 kg/m<sup>2</sup> and 3000 g litter/m<sup>2</sup>. Setting: 90 negative birds, Ross 308, feeding duration 36 days, stocking density 25 kg/m<sup>2</sup>, 3000 g litter/m<sup>2</sup>**

| day | prevalence in % | cfu/sqm           | cfu/g manure        | cfu in intestine | cfu/g feces     | cfu ingested per animal |
|-----|-----------------|-------------------|---------------------|------------------|-----------------|-------------------------|
|     | (mean $\pm$ sd) | (mean $\pm$ sd)   | (mean $\pm$ sd)     | (mean $\pm$ sd)  | (mean $\pm$ sd) | (mean $\pm$ sd)         |
| 1   | 0 $\pm$ 0       | 6e4 $\pm$ 0e4     | 1.9e1 $\pm$ 0e1     | 0e0 $\pm$ 0      | 0e0 $\pm$ 0     | 0e0 $\pm$ 0             |
| 2   | 0 $\pm$ 0       | 3e4 $\pm$ 0e4     | 9.3 $\pm$ 0         | 0e0 $\pm$ 0      | 0e0 $\pm$ 0     | 0e0 $\pm$ 0             |
| 3   | 0 $\pm$ 0       | 1.5e4 $\pm$ 0e4   | 4.4 $\pm$ 0         | 0e0 $\pm$ 0      | 0e0 $\pm$ 0     | 2 $\pm$ 0               |
| 4   | 0 $\pm$ 0       | 7.4e3 $\pm$ 0e3   | 2 $\pm$ 0           | 0e0 $\pm$ 0      | 0e0 $\pm$ 0     | 1 $\pm$ 0               |
| 5   | 0 $\pm$ 0       | 3.7e3 $\pm$ 0e3   | 9e-1 $\pm$ 0e-1     | 0e0 $\pm$ 0      | 0e0 $\pm$ 0     | 0e0 $\pm$ 0             |
| 6   | 0 $\pm$ 0       | 1.9e3 $\pm$ 0e3   | 4.2e-1 $\pm$ 0e-1   | 0e0 $\pm$ 0      | 0e0 $\pm$ 0     | 0e0 $\pm$ 0             |
| 7   | 0 $\pm$ 0       | 9.3e2 $\pm$ 0e2   | 1.9e-1 $\pm$ 0e-1   | 0e0 $\pm$ 0      | 0e0 $\pm$ 0     | 0e0 $\pm$ 0             |
| 8   | 0 $\pm$ 0       | 4.7e2 $\pm$ 0e2   | 8.5e-2 $\pm$ 0e-2   | 0e0 $\pm$ 0      | 0e0 $\pm$ 0     | 0e0 $\pm$ 0             |
| 9   | 0 $\pm$ 0       | 2.3e2 $\pm$ 0e2   | 3.8e-2 $\pm$ 0e-2   | 0e0 $\pm$ 0      | 0e0 $\pm$ 0     | 0e0 $\pm$ 0             |
| 10  | 0 $\pm$ 0       | 1.2e2 $\pm$ 0e2   | 1.7e-2 $\pm$ 0e-2   | 0e0 $\pm$ 0      | 0e0 $\pm$ 0     | 0e0 $\pm$ 0             |
| 11  | 0 $\pm$ 0       | 5.8e1 $\pm$ 0e1   | 7.7e-3 $\pm$ 0e-3   | 0e0 $\pm$ 0      | 0e0 $\pm$ 0     | 0e0 $\pm$ 0             |
| 12  | 0 $\pm$ 0       | 2.9e1 $\pm$ 0e1   | 3.4e-3 $\pm$ 0e-3   | 0e0 $\pm$ 0      | 0e0 $\pm$ 0     | 0e0 $\pm$ 0             |
| 13  | 0 $\pm$ 0       | 1.5e1 $\pm$ 0e1   | 1.5e-3 $\pm$ 0e-3   | 0e0 $\pm$ 0      | 0e0 $\pm$ 0     | 0e0 $\pm$ 0             |
| 14  | 0 $\pm$ 0       | 7.3 $\pm$ 0       | 6.9e-4 $\pm$ 0e-4   | 0e0 $\pm$ 0      | 0e0 $\pm$ 0     | 0e0 $\pm$ 0             |
| 15  | 0 $\pm$ 0       | 3.6 $\pm$ 0       | 3.1e-4 $\pm$ 0e-4   | 0e0 $\pm$ 0      | 0e0 $\pm$ 0     | 0e0 $\pm$ 0             |
| 16  | 0 $\pm$ 0       | 1.8 $\pm$ 0       | 1.4e-4 $\pm$ 0e-4   | 0e0 $\pm$ 0      | 0e0 $\pm$ 0     | 0e0 $\pm$ 0             |
| 17  | 0 $\pm$ 0       | 9.1e-1 $\pm$ 0e-1 | 6.4e-5 $\pm$ 0e-5   | 0e0 $\pm$ 0      | 0e0 $\pm$ 0     | 0e0 $\pm$ 0             |
| 18  | 0 $\pm$ 0       | 4.5e-1 $\pm$ 0e-1 | 2.9e-5 $\pm$ 0e-5   | 0e0 $\pm$ 0      | 0e0 $\pm$ 0     | 0e0 $\pm$ 0             |
| 19  | 0 $\pm$ 0       | 2.3e-1 $\pm$ 0e-1 | 1.3e-5 $\pm$ 0e-5   | 0e0 $\pm$ 0      | 0e0 $\pm$ 0     | 0e0 $\pm$ 0             |
| 20  | 0 $\pm$ 0       | 1.1e-1 $\pm$ 0e-1 | 6.1e-6 $\pm$ 0e-6   | 0e0 $\pm$ 0      | 0e0 $\pm$ 0     | 0e0 $\pm$ 0             |
| 21  | 0 $\pm$ 0       | 5.7e-2 $\pm$ 0e-2 | 2.8e-6 $\pm$ 0e-6   | 0e0 $\pm$ 0      | 0e0 $\pm$ 0     | 0e0 $\pm$ 0             |
| 22  | 0 $\pm$ 0       | 2.8e-2 $\pm$ 0e-2 | 1.3e-6 $\pm$ 0e-6   | 0e0 $\pm$ 0      | 0e0 $\pm$ 0     | 0e0 $\pm$ 0             |
| 23  | 0 $\pm$ 0       | 1.4e-2 $\pm$ 0e-2 | 6e-7 $\pm$ 0e-7     | 0e0 $\pm$ 0      | 0e0 $\pm$ 0     | 0e0 $\pm$ 0             |
| 24  | 0 $\pm$ 0       | 7.1e-3 $\pm$ 0e-3 | 2.8e-7 $\pm$ 0e-7   | 0e0 $\pm$ 0      | 0e0 $\pm$ 0     | 0e0 $\pm$ 0             |
| 25  | 0 $\pm$ 0       | 3.5e-3 $\pm$ 0e-3 | 1.3e-7 $\pm$ 0e-7   | 0e0 $\pm$ 0      | 0e0 $\pm$ 0     | 0e0 $\pm$ 0             |
| 26  | 0 $\pm$ 0       | 1.8e-3 $\pm$ 0e-3 | 6e-8 $\pm$ 0e-8     | 0e0 $\pm$ 0      | 0e0 $\pm$ 0     | 0e0 $\pm$ 0             |
| 27  | 0 $\pm$ 0       | 8.9e-4 $\pm$ 0e-4 | 2.8e-8 $\pm$ 0e-8   | 0e0 $\pm$ 0      | 0e0 $\pm$ 0     | 0e0 $\pm$ 0             |
| 28  | 0 $\pm$ 0       | 4.4e-4 $\pm$ 0e-4 | 1.3e-8 $\pm$ 0e-8   | 0e0 $\pm$ 0      | 0e0 $\pm$ 0     | 0e0 $\pm$ 0             |
| 29  | 0 $\pm$ 0       | 2.2e-4 $\pm$ 0e-4 | 6.1e-9 $\pm$ 0e-9   | 0e0 $\pm$ 0      | 0e0 $\pm$ 0     | 0e0 $\pm$ 0             |
| 30  | 0 $\pm$ 0       | 1.1e-4 $\pm$ 0e-4 | 2.8e-9 $\pm$ 0e-9   | 0e0 $\pm$ 0      | 0e0 $\pm$ 0     | 0e0 $\pm$ 0             |
| 31  | 0 $\pm$ 0       | 5.5e-5 $\pm$ 0e-5 | 1.3e-9 $\pm$ 0e-9   | 0e0 $\pm$ 0      | 0e0 $\pm$ 0     | 0e0 $\pm$ 0             |
| 32  | 0 $\pm$ 0       | 2.8e-5 $\pm$ 0e-5 | 6.3e-10 $\pm$ 0e-10 | 0e0 $\pm$ 0      | 0e0 $\pm$ 0     | 0e0 $\pm$ 0             |
| 33  | 0 $\pm$ 0       | 1.4e-5 $\pm$ 0e-5 | 2.9e-10 $\pm$ 0e-10 | 0e0 $\pm$ 0      | 0e0 $\pm$ 0     | 0e0 $\pm$ 0             |
| 34  | 0 $\pm$ 0       | 6.9e-6 $\pm$ 0e-6 | 1.4e-10 $\pm$ 0e-10 | 0e0 $\pm$ 0      | 0e0 $\pm$ 0     | 0e0 $\pm$ 0             |
| 35  | 0 $\pm$ 0       | 3.5e-6 $\pm$ 0e-6 | 6.5e-11 $\pm$ 0e-11 | 0e0 $\pm$ 0      | 0e0 $\pm$ 0     | 0e0 $\pm$ 0             |
| 36  | 0 $\pm$ 0       | 1.7e-6 $\pm$ 0e-6 | 3.1e-11 $\pm$ 0e-11 | 0e0 $\pm$ 0      | 0e0 $\pm$ 0     | 0e0 $\pm$ 0             |
| 37  | 0 $\pm$ 0       | 8.7e-7 $\pm$ 0e-7 | 1.5e-11 $\pm$ 0e-11 | 0e0 $\pm$ 0      | 0e0 $\pm$ 0     | 0e0 $\pm$ 0             |

The average of the prevalence, the CFU-values per square meter (cfu/sqm) and per gram manure are calculated over all iterations. The CFU values in the intestine as well as the excreted and ingested quantities are obtained by calculating the average over all animals in one iteration at first and then over all iterations.

**Table S25b (log<sub>10</sub> CFU). Calculated numeric values for scenario when the pen is contaminated with 10<sup>6</sup> CFU at the beginning of the fattening period, combined measure stocking density 25 kg/m<sup>2</sup> and 3000 g litter/m<sup>2</sup>. Setting: 90 negative birds, Ross 308, feeding duration 36 days, stocking density 25 kg/m<sup>2</sup>, 3000 g litter/m<sup>2</sup>**

| day | prevalence in % | cfu/sqm           | cfu/g manure      | cfu in intestine  | cfu/g feces       | cfu ingested per animal |
|-----|-----------------|-------------------|-------------------|-------------------|-------------------|-------------------------|
|     | (% mean ± sd)   | (log10 mean ± sd) | (log10 mean ± sd) | (log10 mean ± sd) | (log10 mean ± sd) | (log10 mean ± sd)       |
| 1   | 0 ± 0           | 4.77 ± -Inf       | 1.28 ± -Inf       | -Inf ± -Inf       | -Inf ± -Inf       | -Inf ± 0                |
| 2   | 0 ± 0           | 4.47 ± -Inf       | 0.97 ± -Inf       | -Inf ± -Inf       | -Inf ± -Inf       | -Inf ± 0                |
| 3   | 0 ± 0           | 4.17 ± -Inf       | 0.64 ± -Inf       | -Inf ± -Inf       | -Inf ± -Inf       | 0.3 ± 0                 |
| 4   | 0 ± 0           | 3.87 ± -Inf       | 0.3 ± -Inf        | -Inf ± -Inf       | -Inf ± -Inf       | 0 ± 0                   |
| 5   | 0 ± 0           | 3.57 ± -Inf       | -0.04 ± -Inf      | -Inf ± -Inf       | -Inf ± -Inf       | -Inf ± 0                |
| 6   | 0 ± 0           | 3.27 ± -Inf       | -0.38 ± -Inf      | -Inf ± -Inf       | -Inf ± -Inf       | -Inf ± 0                |
| 7   | 0 ± 0           | 2.97 ± -Inf       | -0.72 ± -Inf      | -Inf ± -Inf       | -Inf ± -Inf       | -Inf ± 0                |
| 8   | 0 ± 0           | 2.67 ± -Inf       | -1.07 ± -Inf      | -Inf ± -Inf       | -Inf ± -Inf       | -Inf ± 0                |
| 9   | 0 ± 0           | 2.37 ± -Inf       | -1.42 ± -Inf      | -Inf ± -Inf       | -Inf ± -Inf       | -Inf ± 0                |
| 10  | 0 ± 0           | 2.07 ± -Inf       | -1.77 ± -Inf      | -Inf ± -Inf       | -Inf ± -Inf       | -Inf ± 0                |
| 11  | 0 ± 0           | 1.76 ± -Inf       | -2.12 ± -Inf      | -Inf ± -Inf       | -Inf ± -Inf       | -Inf ± 0                |
| 12  | 0 ± 0           | 1.46 ± -Inf       | -2.47 ± -Inf      | -Inf ± -Inf       | -Inf ± -Inf       | -Inf ± 0                |
| 13  | 0 ± 0           | 1.16 ± -Inf       | -2.81 ± -Inf      | -Inf ± -Inf       | -Inf ± -Inf       | -Inf ± 0                |
| 14  | 0 ± 0           | 0.86 ± -Inf       | -3.16 ± -Inf      | -Inf ± -Inf       | -Inf ± -Inf       | -Inf ± 0                |
| 15  | 0 ± 0           | 0.56 ± -Inf       | -3.51 ± -Inf      | -Inf ± -Inf       | -Inf ± -Inf       | -Inf ± 0                |
| 16  | 0 ± 0           | 0.26 ± -Inf       | -3.85 ± -Inf      | -Inf ± -Inf       | -Inf ± -Inf       | -Inf ± 0                |
| 17  | 0 ± 0           | -0.04 ± -Inf      | -4.19 ± -Inf      | -Inf ± -Inf       | -Inf ± -Inf       | -Inf ± 0                |
| 18  | 0 ± 0           | -0.34 ± -Inf      | -4.53 ± -Inf      | -Inf ± -Inf       | -Inf ± -Inf       | -Inf ± 0                |
| 19  | 0 ± 0           | -0.64 ± -Inf      | -4.87 ± -Inf      | -Inf ± -Inf       | -Inf ± -Inf       | -Inf ± 0                |
| 20  | 0 ± 0           | -0.94 ± -Inf      | -5.21 ± -Inf      | -Inf ± -Inf       | -Inf ± -Inf       | -Inf ± 0                |
| 21  | 0 ± 0           | -1.25 ± -Inf      | -5.55 ± -Inf      | -Inf ± -Inf       | -Inf ± -Inf       | -Inf ± 0                |
| 22  | 0 ± 0           | -1.55 ± -Inf      | -5.89 ± -Inf      | -Inf ± -Inf       | -Inf ± -Inf       | -Inf ± 0                |
| 23  | 0 ± 0           | -1.85 ± -Inf      | -6.22 ± -Inf      | -Inf ± -Inf       | -Inf ± -Inf       | -Inf ± 0                |
| 24  | 0 ± 0           | -2.15 ± -Inf      | -6.56 ± -Inf      | -Inf ± -Inf       | -Inf ± -Inf       | -Inf ± 0                |
| 25  | 0 ± 0           | -2.45 ± -Inf      | -6.89 ± -Inf      | -Inf ± -Inf       | -Inf ± -Inf       | -Inf ± 0                |
| 26  | 0 ± 0           | -2.75 ± -Inf      | -7.22 ± -Inf      | -Inf ± -Inf       | -Inf ± -Inf       | -Inf ± 0                |
| 27  | 0 ± 0           | -3.05 ± -Inf      | -7.56 ± -Inf      | -Inf ± -Inf       | -Inf ± -Inf       | -Inf ± 0                |
| 28  | 0 ± 0           | -3.35 ± -Inf      | -7.89 ± -Inf      | -Inf ± -Inf       | -Inf ± -Inf       | -Inf ± 0                |
| 29  | 0 ± 0           | -3.65 ± -Inf      | -8.22 ± -Inf      | -Inf ± -Inf       | -Inf ± -Inf       | -Inf ± 0                |
| 30  | 0 ± 0           | -3.95 ± -Inf      | -8.55 ± -Inf      | -Inf ± -Inf       | -Inf ± -Inf       | -Inf ± 0                |
| 31  | 0 ± 0           | -4.26 ± -Inf      | -8.88 ± -Inf      | -Inf ± -Inf       | -Inf ± -Inf       | -Inf ± 0                |
| 32  | 0 ± 0           | -4.56 ± -Inf      | -9.2 ± -Inf       | -Inf ± -Inf       | -Inf ± -Inf       | -Inf ± 0                |
| 33  | 0 ± 0           | -4.86 ± -Inf      | -9.53 ± -Inf      | -Inf ± -Inf       | -Inf ± -Inf       | -Inf ± 0                |
| 34  | 0 ± 0           | -5.16 ± -Inf      | -9.86 ± -Inf      | -Inf ± -Inf       | -Inf ± -Inf       | -Inf ± 0                |
| 35  | 0 ± 0           | -5.46 ± -Inf      | -10.18 ± -Inf     | -Inf ± -Inf       | -Inf ± -Inf       | -Inf ± 0                |
| 36  | 0 ± 0           | -5.76 ± -Inf      | -10.51 ± -Inf     | -Inf ± -Inf       | -Inf ± -Inf       | -Inf ± 0                |
| 37  | 0 ± 0           | -6.06 ± -Inf      | -10.83 ± -Inf     | -Inf ± -Inf       | -Inf ± -Inf       | -Inf ± 0                |

The average of the prevalence, the CFU-values per square meter (cfu/sqm) and per gram manure are calculated over all iterations. The CFU values in the intestine as well as the excreted and ingested quantities are obtained by calculating the average over all animals in one iteration at first and then over all iterations. The decadic logarithm of zero or negative values is negative infinite (-Inf).



**Figure S26.** Calculated infection dynamic for the scenario when the pen is contaminated with  $10^6$  CFU at the beginning of the fattening period, combined measure stocking density  $20 \text{ kg/m}^2$  and  $3000 \text{ g litter/m}^2$ . Dotplots with results for 90 negative birds, Ross 308, feeding duration 36 days, stocking density  $20 \text{ kg/m}^2$ ,  $3000 \text{ g litter/m}^2$  (no infection of birds, thus no plots).

**Table S26a (CFU). Calculated numeric values for scenario when the pen is contaminated with  $10^6$  CFU at the beginning of the fattening period, combined measure stocking density  $20 \text{ kg/m}^2$  and  $3000 \text{ g litter/m}^2$ . Setting: 90 negative birds, Ross 308, feeding duration 36 days, stocking density  $20 \text{ kg/m}^2$ ,  $3000 \text{ g litter/m}^2$**

| day | prevalence in % | cfu/sqm           | cfu/g manure        | cfu in intestine | cfu/g feces     | cfu ingested per animal |
|-----|-----------------|-------------------|---------------------|------------------|-----------------|-------------------------|
|     | (mean $\pm$ sd) | (mean $\pm$ sd)   | (mean $\pm$ sd)     | (mean $\pm$ sd)  | (mean $\pm$ sd) | (mean $\pm$ sd)         |
| 1   | 0 $\pm$ 0       | 4.8e4 $\pm$ 0e4   | 1.5e1 $\pm$ 0e1     | 0e0 $\pm$ 0      | 0e0 $\pm$ 0     | 0e0 $\pm$ 0             |
| 2   | 0 $\pm$ 0       | 2.4e4 $\pm$ 0e4   | 7.5 $\pm$ 0         | 0e0 $\pm$ 0      | 0e0 $\pm$ 0     | 0e0 $\pm$ 0             |
| 3   | 0 $\pm$ 0       | 1.2e4 $\pm$ 0e4   | 3.6 $\pm$ 0         | 0e0 $\pm$ 0      | 0e0 $\pm$ 0     | 1 $\pm$ 0               |
| 4   | 0 $\pm$ 0       | 6e3 $\pm$ 0e3     | 1.7 $\pm$ 0         | 0e0 $\pm$ 0      | 0e0 $\pm$ 0     | 1 $\pm$ 0               |
| 5   | 0 $\pm$ 0       | 3e3 $\pm$ 0e3     | 7.6e-1 $\pm$ 0e-1   | 0e0 $\pm$ 0      | 0e0 $\pm$ 0     | 0e0 $\pm$ 0             |
| 6   | 0 $\pm$ 0       | 1.5e3 $\pm$ 0e3   | 3.6e-1 $\pm$ 0e-1   | 0e0 $\pm$ 0      | 0e0 $\pm$ 0     | 0e0 $\pm$ 0             |
| 7   | 0 $\pm$ 0       | 7.4e2 $\pm$ 0e2   | 1.6e-1 $\pm$ 0e-1   | 0e0 $\pm$ 0      | 0e0 $\pm$ 0     | 0e0 $\pm$ 0             |
| 8   | 0 $\pm$ 0       | 3.7e2 $\pm$ 0e2   | 7.5e-2 $\pm$ 0e-2   | 0e0 $\pm$ 0      | 0e0 $\pm$ 0     | 0e0 $\pm$ 0             |
| 9   | 0 $\pm$ 0       | 1.9e2 $\pm$ 0e2   | 3.4e-2 $\pm$ 0e-2   | 0e0 $\pm$ 0      | 0e0 $\pm$ 0     | 0e0 $\pm$ 0             |
| 10  | 0 $\pm$ 0       | 9.3e1 $\pm$ 0e1   | 1.5e-2 $\pm$ 0e-2   | 0e0 $\pm$ 0      | 0e0 $\pm$ 0     | 0e0 $\pm$ 0             |
| 11  | 0 $\pm$ 0       | 4.7e1 $\pm$ 0e1   | 7e-3 $\pm$ 0e-3     | 0e0 $\pm$ 0      | 0e0 $\pm$ 0     | 0e0 $\pm$ 0             |
| 12  | 0 $\pm$ 0       | 2.3e1 $\pm$ 0e1   | 3.1e-3 $\pm$ 0e-3   | 0e0 $\pm$ 0      | 0e0 $\pm$ 0     | 0e0 $\pm$ 0             |
| 13  | 0 $\pm$ 0       | 1.2e1 $\pm$ 0e1   | 1.4e-3 $\pm$ 0e-3   | 0e0 $\pm$ 0      | 0e0 $\pm$ 0     | 0e0 $\pm$ 0             |
| 14  | 0 $\pm$ 0       | 5.8 $\pm$ 0       | 6.5e-4 $\pm$ 0e-4   | 0e0 $\pm$ 0      | 0e0 $\pm$ 0     | 0e0 $\pm$ 0             |
| 15  | 0 $\pm$ 0       | 2.9 $\pm$ 0       | 2.9e-4 $\pm$ 0e-4   | 0e0 $\pm$ 0      | 0e0 $\pm$ 0     | 0e0 $\pm$ 0             |
| 16  | 0 $\pm$ 0       | 1.5 $\pm$ 0       | 1.3e-4 $\pm$ 0e-4   | 0e0 $\pm$ 0      | 0e0 $\pm$ 0     | 0e0 $\pm$ 0             |
| 17  | 0 $\pm$ 0       | 7.3e-1 $\pm$ 0e-1 | 6.1e-5 $\pm$ 0e-5   | 0e0 $\pm$ 0      | 0e0 $\pm$ 0     | 0e0 $\pm$ 0             |
| 18  | 0 $\pm$ 0       | 3.6e-1 $\pm$ 0e-1 | 2.8e-5 $\pm$ 0e-5   | 0e0 $\pm$ 0      | 0e0 $\pm$ 0     | 0e0 $\pm$ 0             |
| 19  | 0 $\pm$ 0       | 1.8e-1 $\pm$ 0e-1 | 1.3e-5 $\pm$ 0e-5   | 0e0 $\pm$ 0      | 0e0 $\pm$ 0     | 0e0 $\pm$ 0             |
| 20  | 0 $\pm$ 0       | 9.1e-2 $\pm$ 0e-2 | 5.9e-6 $\pm$ 0e-6   | 0e0 $\pm$ 0      | 0e0 $\pm$ 0     | 0e0 $\pm$ 0             |
| 21  | 0 $\pm$ 0       | 4.5e-2 $\pm$ 0e-2 | 2.7e-6 $\pm$ 0e-6   | 0e0 $\pm$ 0      | 0e0 $\pm$ 0     | 0e0 $\pm$ 0             |
| 22  | 0 $\pm$ 0       | 2.3e-2 $\pm$ 0e-2 | 1.3e-6 $\pm$ 0e-6   | 0e0 $\pm$ 0      | 0e0 $\pm$ 0     | 0e0 $\pm$ 0             |
| 23  | 0 $\pm$ 0       | 1.1e-2 $\pm$ 0e-2 | 5.8e-7 $\pm$ 0e-7   | 0e0 $\pm$ 0      | 0e0 $\pm$ 0     | 0e0 $\pm$ 0             |
| 24  | 0 $\pm$ 0       | 5.7e-3 $\pm$ 0e-3 | 2.7e-7 $\pm$ 0e-7   | 0e0 $\pm$ 0      | 0e0 $\pm$ 0     | 0e0 $\pm$ 0             |
| 25  | 0 $\pm$ 0       | 2.8e-3 $\pm$ 0e-3 | 1.3e-7 $\pm$ 0e-7   | 0e0 $\pm$ 0      | 0e0 $\pm$ 0     | 0e0 $\pm$ 0             |
| 26  | 0 $\pm$ 0       | 1.4e-3 $\pm$ 0e-3 | 5.8e-8 $\pm$ 0e-8   | 0e0 $\pm$ 0      | 0e0 $\pm$ 0     | 0e0 $\pm$ 0             |
| 27  | 0 $\pm$ 0       | 7.1e-4 $\pm$ 0e-4 | 2.7e-8 $\pm$ 0e-8   | 0e0 $\pm$ 0      | 0e0 $\pm$ 0     | 0e0 $\pm$ 0             |
| 28  | 0 $\pm$ 0       | 3.5e-4 $\pm$ 0e-4 | 1.3e-8 $\pm$ 0e-8   | 0e0 $\pm$ 0      | 0e0 $\pm$ 0     | 0e0 $\pm$ 0             |
| 29  | 0 $\pm$ 0       | 1.8e-4 $\pm$ 0e-4 | 5.9e-9 $\pm$ 0e-9   | 0e0 $\pm$ 0      | 0e0 $\pm$ 0     | 0e0 $\pm$ 0             |
| 30  | 0 $\pm$ 0       | 8.9e-5 $\pm$ 0e-5 | 2.8e-9 $\pm$ 0e-9   | 0e0 $\pm$ 0      | 0e0 $\pm$ 0     | 0e0 $\pm$ 0             |
| 31  | 0 $\pm$ 0       | 4.4e-5 $\pm$ 0e-5 | 1.3e-9 $\pm$ 0e-9   | 0e0 $\pm$ 0      | 0e0 $\pm$ 0     | 0e0 $\pm$ 0             |
| 32  | 0 $\pm$ 0       | 2.2e-5 $\pm$ 0e-5 | 6.2e-10 $\pm$ 0e-10 | 0e0 $\pm$ 0      | 0e0 $\pm$ 0     | 0e0 $\pm$ 0             |
| 33  | 0 $\pm$ 0       | 1.1e-5 $\pm$ 0e-5 | 2.9e-10 $\pm$ 0e-10 | 0e0 $\pm$ 0      | 0e0 $\pm$ 0     | 0e0 $\pm$ 0             |
| 34  | 0 $\pm$ 0       | 5.5e-6 $\pm$ 0e-6 | 1.4e-10 $\pm$ 0e-10 | 0e0 $\pm$ 0      | 0e0 $\pm$ 0     | 0e0 $\pm$ 0             |
| 35  | 0 $\pm$ 0       | 2.8e-6 $\pm$ 0e-6 | 6.5e-11 $\pm$ 0e-11 | 0e0 $\pm$ 0      | 0e0 $\pm$ 0     | 0e0 $\pm$ 0             |
| 36  | 0 $\pm$ 0       | 1.4e-6 $\pm$ 0e-6 | 3.1e-11 $\pm$ 0e-11 | 0e0 $\pm$ 0      | 0e0 $\pm$ 0     | 0e0 $\pm$ 0             |
| 37  | 0 $\pm$ 0       | 6.9e-7 $\pm$ 0e-7 | 1.4e-11 $\pm$ 0e-11 | 0e0 $\pm$ 0      | 0e0 $\pm$ 0     | 0e0 $\pm$ 0             |

The average of the prevalence, the CFU-values per square meter (cfu/sqm) and per gram manure are calculated over all iterations. The CFU values in the intestine as well as the excreted and ingested quantities are obtained by calculating the average over all animals in one iteration at first and then over all iterations.

**Table S26b (log<sub>10</sub> CFU). Calculated numeric values for scenario when the pen is contaminated with 10<sup>6</sup> CFU at the beginning of the fattening period, combined measure stocking density 20 kg/m<sup>2</sup> and 3000 g litter/m<sup>2</sup>. Setting: 90 negative birds, Ross 308, feeding duration 36 days, stocking density 20 kg/m<sup>2</sup>, 3000 g litter/m<sup>2</sup>**

| day | prevalence in % | cfu/sqm           | cfu/g manure      | cfu in intestine  | cfu/g feces       | cfu ingested per animal |
|-----|-----------------|-------------------|-------------------|-------------------|-------------------|-------------------------|
|     | (% mean ± sd)   | (log10 mean ± sd) | (log10 mean ± sd) | (log10 mean ± sd) | (log10 mean ± sd) | (log10 mean ± sd)       |
| 1   | 0 ± 0           | 4.68 ± -Inf       | 1.19 ± -Inf       | -Inf ± -Inf       | -Inf ± -Inf       | -Inf ± 0                |
| 2   | 0 ± 0           | 4.38 ± -Inf       | 0.88 ± -Inf       | -Inf ± -Inf       | -Inf ± -Inf       | -Inf ± 0                |
| 3   | 0 ± 0           | 4.08 ± -Inf       | 0.55 ± -Inf       | -Inf ± -Inf       | -Inf ± -Inf       | 0 ± 0                   |
| 4   | 0 ± 0           | 3.77 ± -Inf       | 0.22 ± -Inf       | -Inf ± -Inf       | -Inf ± -Inf       | 0 ± 0                   |
| 5   | 0 ± 0           | 3.47 ± -Inf       | -0.12 ± -Inf      | -Inf ± -Inf       | -Inf ± -Inf       | -Inf ± 0                |
| 6   | 0 ± 0           | 3.17 ± -Inf       | -0.44 ± -Inf      | -Inf ± -Inf       | -Inf ± -Inf       | -Inf ± 0                |
| 7   | 0 ± 0           | 2.87 ± -Inf       | -0.78 ± -Inf      | -Inf ± -Inf       | -Inf ± -Inf       | -Inf ± 0                |
| 8   | 0 ± 0           | 2.57 ± -Inf       | -1.13 ± -Inf      | -Inf ± -Inf       | -Inf ± -Inf       | -Inf ± 0                |
| 9   | 0 ± 0           | 2.27 ± -Inf       | -1.47 ± -Inf      | -Inf ± -Inf       | -Inf ± -Inf       | -Inf ± 0                |
| 10  | 0 ± 0           | 1.97 ± -Inf       | -1.81 ± -Inf      | -Inf ± -Inf       | -Inf ± -Inf       | -Inf ± 0                |
| 11  | 0 ± 0           | 1.67 ± -Inf       | -2.16 ± -Inf      | -Inf ± -Inf       | -Inf ± -Inf       | -Inf ± 0                |
| 12  | 0 ± 0           | 1.37 ± -Inf       | -2.5 ± -Inf       | -Inf ± -Inf       | -Inf ± -Inf       | -Inf ± 0                |
| 13  | 0 ± 0           | 1.07 ± -Inf       | -2.85 ± -Inf      | -Inf ± -Inf       | -Inf ± -Inf       | -Inf ± 0                |
| 14  | 0 ± 0           | 0.76 ± -Inf       | -3.19 ± -Inf      | -Inf ± -Inf       | -Inf ± -Inf       | -Inf ± 0                |
| 15  | 0 ± 0           | 0.46 ± -Inf       | -3.53 ± -Inf      | -Inf ± -Inf       | -Inf ± -Inf       | -Inf ± 0                |
| 16  | 0 ± 0           | 0.16 ± -Inf       | -3.87 ± -Inf      | -Inf ± -Inf       | -Inf ± -Inf       | -Inf ± 0                |
| 17  | 0 ± 0           | -0.14 ± -Inf      | -4.21 ± -Inf      | -Inf ± -Inf       | -Inf ± -Inf       | -Inf ± 0                |
| 18  | 0 ± 0           | -0.44 ± -Inf      | -4.55 ± -Inf      | -Inf ± -Inf       | -Inf ± -Inf       | -Inf ± 0                |
| 19  | 0 ± 0           | -0.74 ± -Inf      | -4.89 ± -Inf      | -Inf ± -Inf       | -Inf ± -Inf       | -Inf ± 0                |
| 20  | 0 ± 0           | -1.04 ± -Inf      | -5.23 ± -Inf      | -Inf ± -Inf       | -Inf ± -Inf       | -Inf ± 0                |
| 21  | 0 ± 0           | -1.34 ± -Inf      | -5.57 ± -Inf      | -Inf ± -Inf       | -Inf ± -Inf       | -Inf ± 0                |
| 22  | 0 ± 0           | -1.64 ± -Inf      | -5.9 ± -Inf       | -Inf ± -Inf       | -Inf ± -Inf       | -Inf ± 0                |
| 23  | 0 ± 0           | -1.94 ± -Inf      | -6.24 ± -Inf      | -Inf ± -Inf       | -Inf ± -Inf       | -Inf ± 0                |
| 24  | 0 ± 0           | -2.25 ± -Inf      | -6.57 ± -Inf      | -Inf ± -Inf       | -Inf ± -Inf       | -Inf ± 0                |
| 25  | 0 ± 0           | -2.55 ± -Inf      | -6.9 ± -Inf       | -Inf ± -Inf       | -Inf ± -Inf       | -Inf ± 0                |
| 26  | 0 ± 0           | -2.85 ± -Inf      | -7.23 ± -Inf      | -Inf ± -Inf       | -Inf ± -Inf       | -Inf ± 0                |
| 27  | 0 ± 0           | -3.15 ± -Inf      | -7.57 ± -Inf      | -Inf ± -Inf       | -Inf ± -Inf       | -Inf ± 0                |
| 28  | 0 ± 0           | -3.45 ± -Inf      | -7.9 ± -Inf       | -Inf ± -Inf       | -Inf ± -Inf       | -Inf ± 0                |
| 29  | 0 ± 0           | -3.75 ± -Inf      | -8.23 ± -Inf      | -Inf ± -Inf       | -Inf ± -Inf       | -Inf ± 0                |
| 30  | 0 ± 0           | -4.05 ± -Inf      | -8.55 ± -Inf      | -Inf ± -Inf       | -Inf ± -Inf       | -Inf ± 0                |
| 31  | 0 ± 0           | -4.35 ± -Inf      | -8.88 ± -Inf      | -Inf ± -Inf       | -Inf ± -Inf       | -Inf ± 0                |
| 32  | 0 ± 0           | -4.65 ± -Inf      | -9.21 ± -Inf      | -Inf ± -Inf       | -Inf ± -Inf       | -Inf ± 0                |
| 33  | 0 ± 0           | -4.95 ± -Inf      | -9.54 ± -Inf      | -Inf ± -Inf       | -Inf ± -Inf       | -Inf ± 0                |
| 34  | 0 ± 0           | -5.26 ± -Inf      | -9.86 ± -Inf      | -Inf ± -Inf       | -Inf ± -Inf       | -Inf ± 0                |
| 35  | 0 ± 0           | -5.56 ± -Inf      | -10.19 ± -Inf     | -Inf ± -Inf       | -Inf ± -Inf       | -Inf ± 0                |
| 36  | 0 ± 0           | -5.86 ± -Inf      | -10.51 ± -Inf     | -Inf ± -Inf       | -Inf ± -Inf       | -Inf ± 0                |
| 37  | 0 ± 0           | -6.16 ± -Inf      | -10.84 ± -Inf     | -Inf ± -Inf       | -Inf ± -Inf       | -Inf ± 0                |

The average of the prevalence, the CFU-values per square meter (cfu/sqm) and per gram manure are calculated over all iterations. The CFU values in the intestine as well as the excreted and ingested quantities are obtained by calculating the average over all animals in one iteration at first and then over all iterations. The decadic logarithm of zero or negative values is negative infinite (-Inf).

Model results averaged over all 100 iterations with breed: rowan ranger , stocking density: 25 kg/sqm and 90 chicken ( 0 seeders and 90 sentinels )

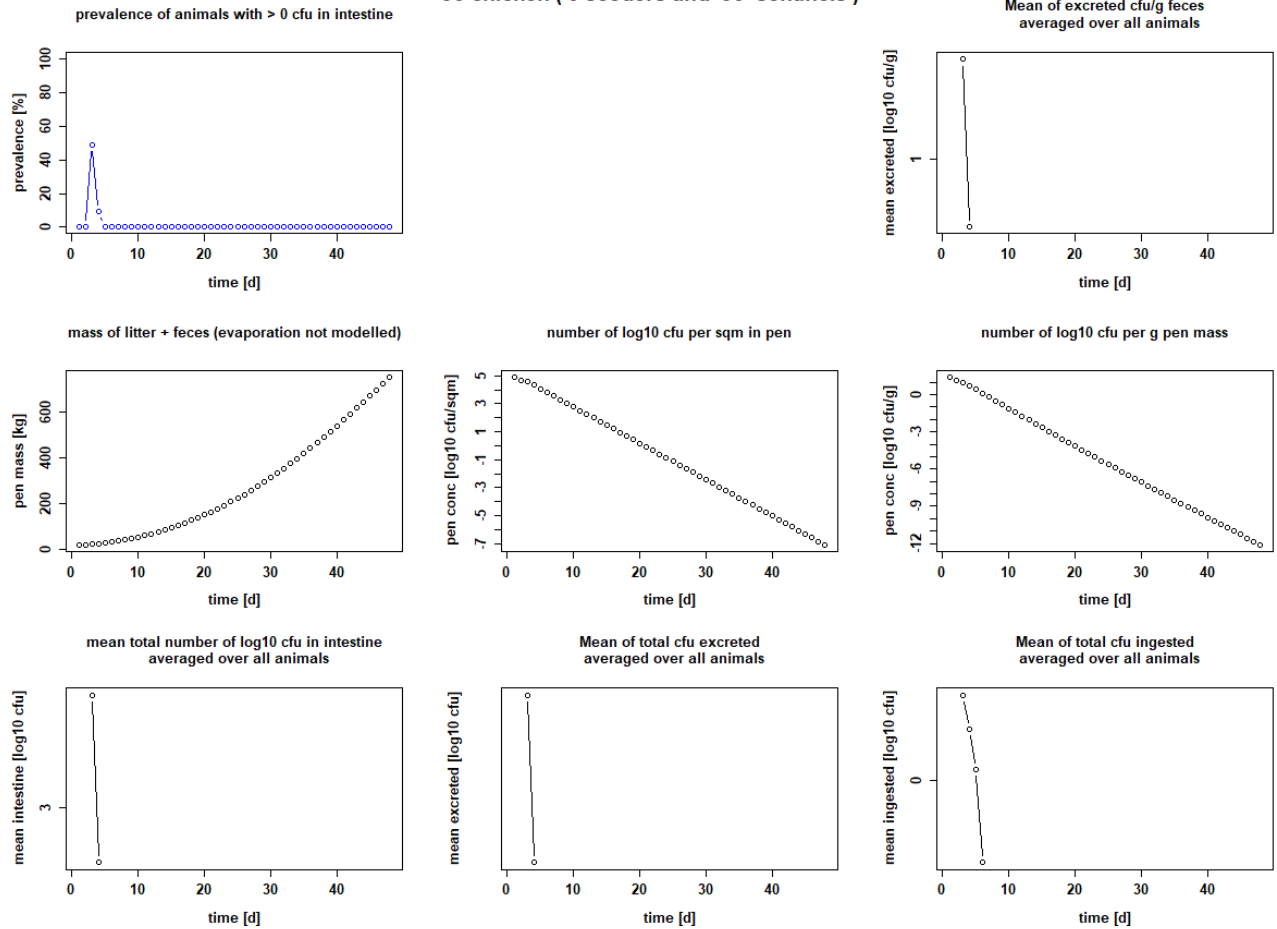

**Figure S27.** Calculated infection dynamic for the scenario when the pen is contaminated with  $10^6$  CFU at the beginning of the fattening period, combined measure slow growing breed, stocking density 25 kg/m<sup>2</sup> and 3000 g litter/m<sup>2</sup>. Dotplots with results for 90 negative birds, Rowan x Ranger, feeding duration 47 days, stocking density 25 kg/m<sup>2</sup>, 3000 g litter/m<sup>2</sup>

**Table S27a (CFU). Calculated numeric values for scenario when the pen is contaminated with  $10^6$  CFU at the beginning of the fattening period, combined measure slow growing breed, stocking density 25 kg/m<sup>2</sup> and 3000 g litter/m<sup>2</sup>. Setting: 90 negative birds, Rowan x Ranger, feeding duration 47 days, stocking density 25 kg/m<sup>2</sup>, 3000 g litter/m<sup>2</sup>**

| day | prevalence in % | cfu/sqm         | cfu/g manure      | cfu in intestine | cfu/g feces   | cfu ingested per animal |
|-----|-----------------|-----------------|-------------------|------------------|---------------|-------------------------|
|     | (mean ± sd)     | (mean ± sd)     | (mean ± sd)       | (mean ± sd)      | (mean ± sd)   | (mean ± sd)             |
| 1   | 0 ± 0           | 7.3e4 ± 0e4     | 2.3e1 ± 0e1       | 0e0 ± 0          | 0e0 ± 0       | 0e0 ± 0                 |
| 2   | 0 ± 0           | 3.6e4 ± 0e4     | 1.2e1 ± 0e1       | 0e0 ± 0          | 0e0 ± 0       | 0e0 ± 0                 |
| 3   | 32.12 ± 5.09    | 2.6e4 ± 0.4e4   | 7.3 ± 1           | 2e3 ± 0.9e3      | 1.9e1 ± 0.9e1 | 3 ± 0                   |
| 4   | 0 ± 0           | 1.3e4 ± 0.2e4   | 3.2 ± 0.5         | 0e0 ± 0          | 0e0 ± 0       | 1.5 ± 0.5               |
| 5   | 0 ± 0           | 6.5e3 ± 0.9e3   | 1.4 ± 0.2         | 0e0 ± 0          | 0e0 ± 0       | 2.6e-1 ± 4.4e-1         |
| 6   | 0 ± 0           | 3.3e3 ± 0.5e3   | 6.6e-1 ± 0.9e-1   | 0e0 ± 0          | 0e0 ± 0       | 0e0 ± 0                 |
| 7   | 0 ± 0           | 1.6e3 ± 0.2e3   | 2.9e-1 ± 0.4e-1   | 0e0 ± 0          | 0e0 ± 0       | 0e0 ± 0                 |
| 8   | 0 ± 0           | 8.2e2 ± 1.1e2   | 1.3e-1 ± 0.2e-1   | 0e0 ± 0          | 0e0 ± 0       | 0e0 ± 0                 |
| 9   | 0 ± 0           | 4.1e2 ± 0.6e2   | 5.8e-2 ± 0.8e-2   | 0e0 ± 0          | 0e0 ± 0       | 0e0 ± 0                 |
| 10  | 0 ± 0           | 2e2 ± 0.3e2     | 2.6e-2 ± 0.4e-2   | 0e0 ± 0          | 0e0 ± 0       | 0e0 ± 0                 |
| 11  | 0 ± 0           | 1e2 ± 0.1e2     | 1.1e-2 ± 0.2e-2   | 0e0 ± 0          | 0e0 ± 0       | 0e0 ± 0                 |
| 12  | 0 ± 0           | 5.1e1 ± 0.7e1   | 5.1e-3 ± 0.7e-3   | 0e0 ± 0          | 0e0 ± 0       | 0e0 ± 0                 |
| 13  | 0 ± 0           | 2.6e1 ± 0.4e1   | 2.3e-3 ± 0.3e-3   | 0e0 ± 0          | 0e0 ± 0       | 0e0 ± 0                 |
| 14  | 0 ± 0           | 1.3e1 ± 0.2e1   | 1e-3 ± 0.1e-3     | 0e0 ± 0          | 0e0 ± 0       | 0e0 ± 0                 |
| 15  | 0 ± 0           | 6.4 ± 0.9       | 4.6e-4 ± 0.6e-4   | 0e0 ± 0          | 0e0 ± 0       | 0e0 ± 0                 |
| 16  | 0 ± 0           | 3.2 ± 0.4       | 2.1e-4 ± 0.3e-4   | 0e0 ± 0          | 0e0 ± 0       | 0e0 ± 0                 |
| 17  | 0 ± 0           | 1.6 ± 0.2       | 9.5e-5 ± 1.3e-5   | 0e0 ± 0          | 0e0 ± 0       | 0e0 ± 0                 |
| 18  | 0 ± 0           | 8e-1 ± 1.1e-1   | 4.3e-5 ± 0.6e-5   | 0e0 ± 0          | 0e0 ± 0       | 0e0 ± 0                 |
| 19  | 0 ± 0           | 4e-1 ± 0.6e-1   | 2e-5 ± 0.3e-5     | 0e0 ± 0          | 0e0 ± 0       | 0e0 ± 0                 |
| 20  | 0 ± 0           | 2e-1 ± 0.3e-1   | 9e-6 ± 1.3e-6     | 0e0 ± 0          | 0e0 ± 0       | 0e0 ± 0                 |
| 21  | 0 ± 0           | 10e-2 ± 1.4e-2  | 4.2e-6 ± 0.6e-6   | 0e0 ± 0          | 0e0 ± 0       | 0e0 ± 0                 |
| 22  | 0 ± 0           | 5e-2 ± 0.7e-2   | 1.9e-6 ± 0.3e-6   | 0e0 ± 0          | 0e0 ± 0       | 0e0 ± 0                 |
| 23  | 0 ± 0           | 2.5e-2 ± 0.3e-2 | 8.9e-7 ± 1.2e-7   | 0e0 ± 0          | 0e0 ± 0       | 0e0 ± 0                 |
| 24  | 0 ± 0           | 1.2e-2 ± 0.2e-2 | 4.1e-7 ± 0.6e-7   | 0e0 ± 0          | 0e0 ± 0       | 0e0 ± 0                 |
| 25  | 0 ± 0           | 6.2e-3 ± 0.9e-3 | 1.9e-7 ± 0.3e-7   | 0e0 ± 0          | 0e0 ± 0       | 0e0 ± 0                 |
| 26  | 0 ± 0           | 3.1e-3 ± 0.4e-3 | 8.9e-8 ± 1.2e-8   | 0e0 ± 0          | 0e0 ± 0       | 0e0 ± 0                 |
| 27  | 0 ± 0           | 1.6e-3 ± 0.2e-3 | 4.2e-8 ± 0.6e-8   | 0e0 ± 0          | 0e0 ± 0       | 0e0 ± 0                 |
| 28  | 0 ± 0           | 7.8e-4 ± 1.1e-4 | 2e-8 ± 0.3e-8     | 0e0 ± 0          | 0e0 ± 0       | 0e0 ± 0                 |
| 29  | 0 ± 0           | 3.9e-4 ± 0.5e-4 | 9.1e-9 ± 1.3e-9   | 0e0 ± 0          | 0e0 ± 0       | 0e0 ± 0                 |
| 30  | 0 ± 0           | 1.9e-4 ± 0.3e-4 | 4.3e-9 ± 0.6e-9   | 0e0 ± 0          | 0e0 ± 0       | 0e0 ± 0                 |
| 31  | 0 ± 0           | 9.7e-5 ± 1.4e-5 | 2e-9 ± 0.3e-9     | 0e0 ± 0          | 0e0 ± 0       | 0e0 ± 0                 |
| 32  | 0 ± 0           | 4.9e-5 ± 0.7e-5 | 9.5e-10 ± 1.3e-10 | 0e0 ± 0          | 0e0 ± 0       | 0e0 ± 0                 |
| 33  | 0 ± 0           | 2.4e-5 ± 0.3e-5 | 4.5e-10 ± 0.6e-10 | 0e0 ± 0          | 0e0 ± 0       | 0e0 ± 0                 |
| 34  | 0 ± 0           | 1.2e-5 ± 0.2e-5 | 2.1e-10 ± 0.3e-10 | 0e0 ± 0          | 0e0 ± 0       | 0e0 ± 0                 |
| 35  | 0 ± 0           | 6.1e-6 ± 0.8e-6 | 1e-10 ± 0.1e-10   | 0e0 ± 0          | 0e0 ± 0       | 0e0 ± 0                 |
| 36  | 0 ± 0           | 3e-6 ± 0.4e-6   | 4.8e-11 ± 0.7e-11 | 0e0 ± 0          | 0e0 ± 0       | 0e0 ± 0                 |
| 37  | 0 ± 0           | 1.5e-6 ± 0.2e-6 | 2.3e-11 ± 0.3e-11 | 0e0 ± 0          | 0e0 ± 0       | 0e0 ± 0                 |
| 38  | 0 ± 0           | 7.6e-7 ± 1.1e-7 | 1.1e-11 ± 0.1e-11 | 0e0 ± 0          | 0e0 ± 0       | 0e0 ± 0                 |
| 39  | 0 ± 0           | 3.8e-7 ± 0.5e-7 | 5.1e-12 ± 0.7e-12 | 0e0 ± 0          | 0e0 ± 0       | 0e0 ± 0                 |
| 40  | 0 ± 0           | 1.9e-7 ± 0.3e-7 | 2.4e-12 ± 0.3e-12 | 0e0 ± 0          | 0e0 ± 0       | 0e0 ± 0                 |
| 41  | 0 ± 0           | 9.5e-8 ± 1.3e-8 | 1.2e-12 ± 0.2e-12 | 0e0 ± 0          | 0e0 ± 0       | 0e0 ± 0                 |
| 42  | 0 ± 0           | 4.8e-8 ± 0.7e-8 | 5.6e-13 ± 0.8e-13 | 0e0 ± 0          | 0e0 ± 0       | 0e0 ± 0                 |
| 43  | 0 ± 0           | 2.4e-8 ± 0.3e-8 | 2.7e-13 ± 0.4e-13 | 0e0 ± 0          | 0e0 ± 0       | 0e0 ± 0                 |
| 44  | 0 ± 0           | 1.2e-8 ± 0.2e-8 | 1.3e-13 ± 0.2e-13 | 0e0 ± 0          | 0e0 ± 0       | 0e0 ± 0                 |
| 45  | 0 ± 0           | 5.9e-9 ± 0.8e-9 | 6.1e-14 ± 0.9e-14 | 0e0 ± 0          | 0e0 ± 0       | 0e0 ± 0                 |
| 46  | 0 ± 0           | 3e-9 ± 0.4e-9   | 2.9e-14 ± 0.4e-14 | 0e0 ± 0          | 0e0 ± 0       | 0e0 ± 0                 |
| 47  | 0 ± 0           | 1.5e-9 ± 0.2e-9 | 1.4e-14 ± 0.2e-14 | 0e0 ± 0          | 0e0 ± 0       | 0e0 ± 0                 |
| 48  | 0 ± 0           | 7.4e-10 ± 1e-10 | 6.8e-15 ± 0.9e-15 | 0e0 ± 0          | 0e0 ± 0       | 0e0 ± 0                 |

The average of the prevalence, the CFU-values per square meter (cfu/sqm) and per gram manure are calculated over all iterations. The CFU values in the intestine as well as the excreted and ingested quantities are obtained by calculating the average over all animals in one iteration at first and then over all iterations.



**Table S27b (log<sub>10</sub> CFU). Calculated numeric values for scenario when the pen is contaminated with 10<sup>6</sup> CFU at the beginning of the fattening period, combined measure slow growing breed, stocking density 25 kg/m<sup>2</sup> and 3000 g litter/m<sup>2</sup>. Setting: 90 negative birds, Rowan x Ranger, feeding duration 47 days, stocking density 25 kg/m<sup>2</sup>, 3000 g litter/m<sup>2</sup>**

***Model results averaged of all birds and iterations with breed: rowan ranger , stocking density: 25 kg/sqm and 90 chicken ( 0 seeders and 90 sentinels )***

| day | prevalence in % | cfu/sqm           | cfu/g manure      | cfu in intestine  | cfu/g feces       | cfu ingested per animal |
|-----|-----------------|-------------------|-------------------|-------------------|-------------------|-------------------------|
|     | (% mean ± sd)   | (log10 mean ± sd) | (log10 mean ± sd) | (log10 mean ± sd) | (log10 mean ± sd) | (log10 mean ± sd)       |
| 1   | 0 ± 0           | 4.86 ± -Inf       | 1.37 ± -Inf       | -Inf ± -Inf       | -Inf ± -Inf       | -Inf ± 0                |
| 2   | 0 ± 0           | 4.56 ± -Inf       | 1.06 ± -Inf       | -Inf ± -Inf       | -Inf ± -Inf       | -Inf ± 0                |
| 3   | 32.12 ± 5.09    | 4.42 ± 3.56       | 0.86 ± 0.01       | 3.31 ± 2.97       | 1.29 ± 0.95       | 0.48 ± 0                |
| 4   | 0 ± 0           | 4.12 ± 3.26       | 0.51 ± -0.35      | -Inf ± -Inf       | -Inf ± -Inf       | 0.18 ± -0.3             |
| 5   | 0 ± 0           | 3.82 ± 2.96       | 0.16 ± -0.7       | -Inf ± -Inf       | -Inf ± -Inf       | -0.59 ± -0.36           |
| 6   | 0 ± 0           | 3.51 ± 2.66       | -0.18 ± -1.04     | -Inf ± -Inf       | -Inf ± -Inf       | -Inf ± 0                |
| 7   | 0 ± 0           | 3.21 ± 2.36       | -0.53 ± -1.39     | -Inf ± -Inf       | -Inf ± -Inf       | -Inf ± 0                |
| 8   | 0 ± 0           | 2.91 ± 2.06       | -0.89 ± -1.74     | -Inf ± -Inf       | -Inf ± -Inf       | -Inf ± 0                |
| 9   | 0 ± 0           | 2.61 ± 1.75       | -1.24 ± -2.09     | -Inf ± -Inf       | -Inf ± -Inf       | -Inf ± 0                |
| 10  | 0 ± 0           | 2.31 ± 1.45       | -1.59 ± -2.45     | -Inf ± -Inf       | -Inf ± -Inf       | -Inf ± 0                |
| 11  | 0 ± 0           | 2.01 ± 1.15       | -1.94 ± -2.8      | -Inf ± -Inf       | -Inf ± -Inf       | -Inf ± 0                |
| 12  | 0 ± 0           | 1.71 ± 0.85       | -2.29 ± -3.15     | -Inf ± -Inf       | -Inf ± -Inf       | -Inf ± 0                |
| 13  | 0 ± 0           | 1.41 ± 0.55       | -2.64 ± -3.5      | -Inf ± -Inf       | -Inf ± -Inf       | -Inf ± 0                |
| 14  | 0 ± 0           | 1.11 ± 0.25       | -2.99 ± -3.85     | -Inf ± -Inf       | -Inf ± -Inf       | -Inf ± 0                |
| 15  | 0 ± 0           | 0.8 ± -0.05       | -3.34 ± -4.19     | -Inf ± -Inf       | -Inf ± -Inf       | -Inf ± 0                |
| 16  | 0 ± 0           | 0.5 ± -0.35       | -3.68 ± -4.54     | -Inf ± -Inf       | -Inf ± -Inf       | -Inf ± 0                |
| 17  | 0 ± 0           | 0.2 ± -0.65       | -4.02 ± -4.88     | -Inf ± -Inf       | -Inf ± -Inf       | -Inf ± 0                |
| 18  | 0 ± 0           | -0.1 ± -0.95      | -4.37 ± -5.22     | -Inf ± -Inf       | -Inf ± -Inf       | -Inf ± 0                |
| 19  | 0 ± 0           | -0.4 ± -1.26      | -4.71 ± -5.56     | -Inf ± -Inf       | -Inf ± -Inf       | -Inf ± 0                |
| 20  | 0 ± 0           | -0.7 ± -1.56      | -5.04 ± -5.9      | -Inf ± -Inf       | -Inf ± -Inf       | -Inf ± 0                |
| 21  | 0 ± 0           | -1 ± -1.86        | -5.38 ± -6.24     | -Inf ± -Inf       | -Inf ± -Inf       | -Inf ± 0                |
| 22  | 0 ± 0           | -1.3 ± -2.16      | -5.72 ± -6.57     | -Inf ± -Inf       | -Inf ± -Inf       | -Inf ± 0                |
| 23  | 0 ± 0           | -1.6 ± -2.46      | -6.05 ± -6.91     | -Inf ± -Inf       | -Inf ± -Inf       | -Inf ± 0                |
| 24  | 0 ± 0           | -1.9 ± -2.76      | -6.39 ± -7.24     | -Inf ± -Inf       | -Inf ± -Inf       | -Inf ± 0                |
| 25  | 0 ± 0           | -2.21 ± -3.06     | -6.72 ± -7.57     | -Inf ± -Inf       | -Inf ± -Inf       | -Inf ± 0                |
| 26  | 0 ± 0           | -2.51 ± -3.36     | -7.05 ± -7.91     | -Inf ± -Inf       | -Inf ± -Inf       | -Inf ± 0                |
| 27  | 0 ± 0           | -2.81 ± -3.66     | -7.38 ± -8.24     | -Inf ± -Inf       | -Inf ± -Inf       | -Inf ± 0                |
| 28  | 0 ± 0           | -3.11 ± -3.96     | -7.71 ± -8.57     | -Inf ± -Inf       | -Inf ± -Inf       | -Inf ± 0                |
| 29  | 0 ± 0           | -3.41 ± -4.27     | -8.04 ± -8.9      | -Inf ± -Inf       | -Inf ± -Inf       | -Inf ± 0                |
| 30  | 0 ± 0           | -3.71 ± -4.57     | -8.37 ± -9.22     | -Inf ± -Inf       | -Inf ± -Inf       | -Inf ± 0                |
| 31  | 0 ± 0           | -4.01 ± -4.87     | -8.7 ± -9.55      | -Inf ± -Inf       | -Inf ± -Inf       | -Inf ± 0                |
| 32  | 0 ± 0           | -4.31 ± -5.17     | -9.02 ± -9.88     | -Inf ± -Inf       | -Inf ± -Inf       | -Inf ± 0                |
| 33  | 0 ± 0           | -4.61 ± -5.47     | -9.35 ± -10.21    | -Inf ± -Inf       | -Inf ± -Inf       | -Inf ± 0                |
| 34  | 0 ± 0           | -4.91 ± -5.77     | -9.67 ± -10.53    | -Inf ± -Inf       | -Inf ± -Inf       | -Inf ± 0                |
| 35  | 0 ± 0           | -5.22 ± -6.07     | -10 ± -10.86      | -Inf ± -Inf       | -Inf ± -Inf       | -Inf ± 0                |
| 36  | 0 ± 0           | -5.52 ± -6.37     | -10.32 ± -11.18   | -Inf ± -Inf       | -Inf ± -Inf       | -Inf ± 0                |
| 37  | 0 ± 0           | -5.82 ± -6.67     | -10.65 ± -11.5    | -Inf ± -Inf       | -Inf ± -Inf       | -Inf ± 0                |
| 38  | 0 ± 0           | -6.12 ± -6.98     | -10.97 ± -11.83   | -Inf ± -Inf       | -Inf ± -Inf       | -Inf ± 0                |
| 39  | 0 ± 0           | -6.42 ± -7.28     | -11.29 ± -12.15   | -Inf ± -Inf       | -Inf ± -Inf       | -Inf ± 0                |
| 40  | 0 ± 0           | -6.72 ± -7.58     | -11.61 ± -12.47   | -Inf ± -Inf       | -Inf ± -Inf       | -Inf ± 0                |
| 41  | 0 ± 0           | -7.02 ± -7.88     | -11.93 ± -12.79   | -Inf ± -Inf       | -Inf ± -Inf       | -Inf ± 0                |
| 42  | 0 ± 0           | -7.32 ± -8.18     | -12.26 ± -13.11   | -Inf ± -Inf       | -Inf ± -Inf       | -Inf ± 0                |
| 43  | 0 ± 0           | -7.62 ± -8.48     | -12.58 ± -13.43   | -Inf ± -Inf       | -Inf ± -Inf       | -Inf ± 0                |
| 44  | 0 ± 0           | -7.92 ± -8.78     | -12.89 ± -13.75   | -Inf ± -Inf       | -Inf ± -Inf       | -Inf ± 0                |
| 45  | 0 ± 0           | -8.23 ± -9.08     | -13.21 ± -14.07   | -Inf ± -Inf       | -Inf ± -Inf       | -Inf ± 0                |
| 46  | 0 ± 0           | -8.53 ± -9.38     | -13.53 ± -14.39   | -Inf ± -Inf       | -Inf ± -Inf       | -Inf ± 0                |
| 47  | 0 ± 0           | -8.83 ± -9.68     | -13.85 ± -14.71   | -Inf ± -Inf       | -Inf ± -Inf       | -Inf ± 0                |
| 48  | 0 ± 0           | -9.13 ± -9.99     | -14.17 ± -15.02   | -Inf ± -Inf       | -Inf ± -Inf       | -Inf ± 0                |

The average of the prevalence, the CFU-values per square meter (cfu/sqm) and per gram manure are calculated over all iterations. The CFU values in the intestine as well as the excreted and ingested quantities are obtained by calculating the average over all animals in one iteration at first and then over all iterations. The decadic logarithm of zero or negative values is negative infinite (-Inf).

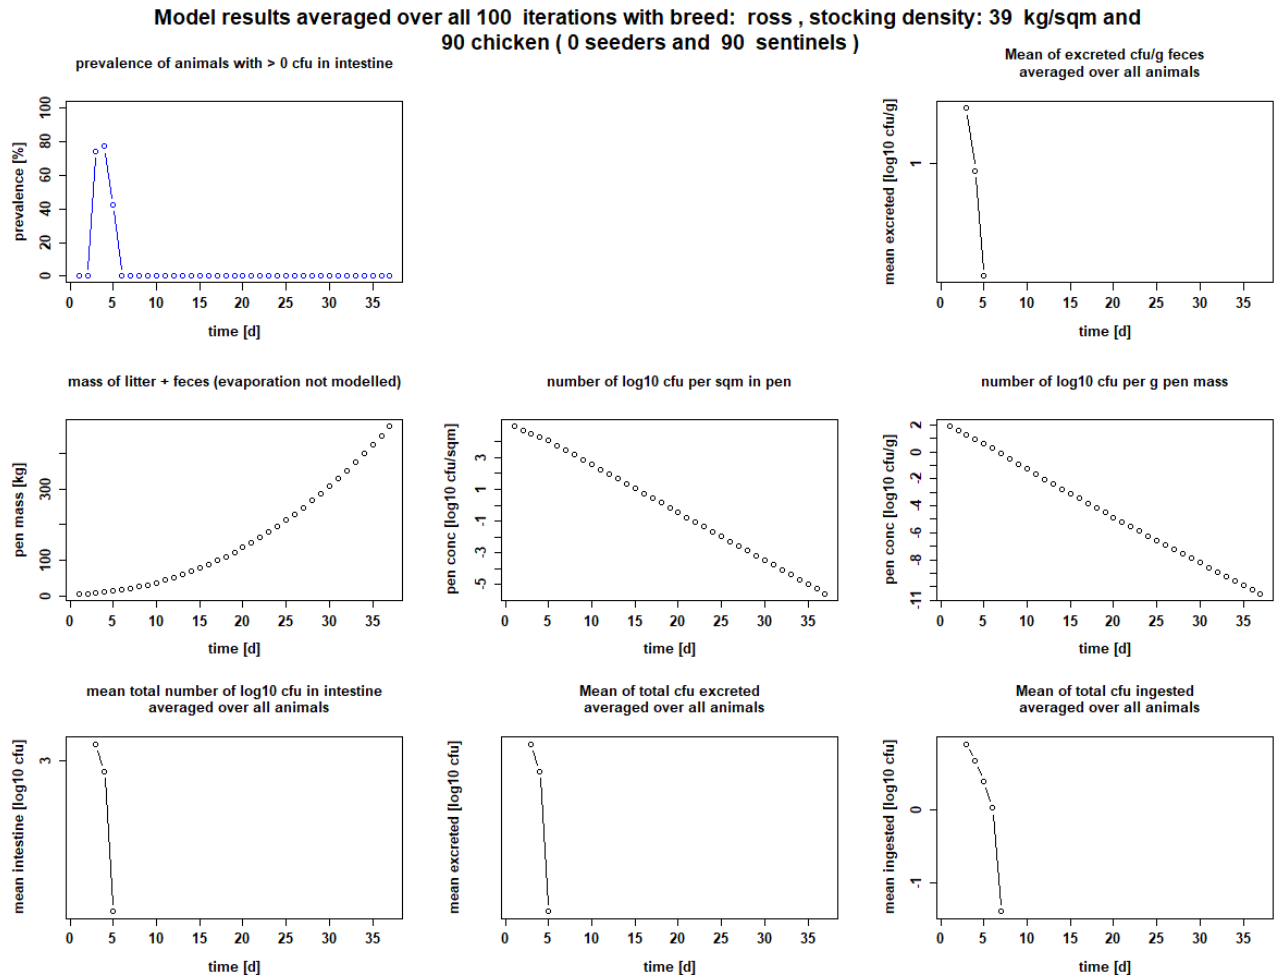

**Figure S28. Calculated infection dynamic for the scenario when the pen is contaminated with  $10^6$  CFU at the beginning of the fattening period, measure reduced growth rate of ESBLs in the intestines.** Dotplots with results for 90 negative birds, Ross 308, feeding duration 36 days, stocking density 39 kg/m<sup>2</sup>, 1000 g litter/m<sup>2</sup>, growth rate  $10^4$

**Table S28a (CFU). Calculated numeric values for scenario when the pen is contaminated with  $10^6$  CFU at the beginning of the fattening period, measure reduced growth rate of ESBLs in the intestines.** Setting: 90 negative birds, Ross 308, feeding duration 36 days, stocking density 39 kg/m<sup>2</sup>, 1000 g litter/m<sup>2</sup>, growth rate  $10^4$

| day | prevalence in %   | cfu/sqm             | cfu/g manure          | cfu in intestine  | cfu/g feces       | cfu ingested per animal |
|-----|-------------------|---------------------|-----------------------|-------------------|-------------------|-------------------------|
|     | (mean $\pm$ sd)   | (mean $\pm$ sd)     | (mean $\pm$ sd)       | (mean $\pm$ sd)   | (mean $\pm$ sd)   | (mean $\pm$ sd)         |
| 1   | 0 $\pm$ 0         | 9.3e4 $\pm$ 0e4     | 8e1 $\pm$ 0e1         | 0e0 $\pm$ 0       | 0e0 $\pm$ 0       | 0e0 $\pm$ 0             |
| 2   | 0 $\pm$ 0         | 4.6e4 $\pm$ 0e4     | 3.5e1 $\pm$ 0e1       | 0e0 $\pm$ 0       | 0e0 $\pm$ 0       | 0e0 $\pm$ 0             |
| 3   | 73.54 $\pm$ 4.64  | 2.9e4 $\pm$ 0.1e4   | 1.7e1 $\pm$ 0.1e1     | 1.2e3 $\pm$ 0.3e3 | 1.8e1 $\pm$ 0.4e1 | 8 $\pm$ 0               |
| 4   | 77.04 $\pm$ 4.79  | 1.9e4 $\pm$ 0.2e4   | 8.9 $\pm$ 0.8         | 9.3e2 $\pm$ 2.8e2 | 9.3 $\pm$ 2.8     | 4.72 $\pm$ 0.5          |
| 5   | 43.66 $\pm$ 15.02 | 1.2e4 $\pm$ 0.2e4   | 4.2 $\pm$ 0.7         | 4.1e2 $\pm$ 2.3e2 | 3.5 $\pm$ 2       | 2.44 $\pm$ 0.5          |
| 6   | 0 $\pm$ 0         | 5.8e3 $\pm$ 0.9e3   | 1.8 $\pm$ 0.3         | 0e0 $\pm$ 0       | 0e0 $\pm$ 0       | 1.08 $\pm$ 0.3          |
| 7   | 0 $\pm$ 0         | 2.9e3 $\pm$ 0.5e3   | 7.3e-1 $\pm$ 1.1e-1   | 0e0 $\pm$ 0       | 0e0 $\pm$ 0       | 3e-2 $\pm$ 17.1e-2      |
| 8   | 0 $\pm$ 0         | 1.5e3 $\pm$ 0.2e3   | 3e-1 $\pm$ 0.5e-1     | 0e0 $\pm$ 0       | 0e0 $\pm$ 0       | 0e0 $\pm$ 0             |
| 9   | 0 $\pm$ 0         | 7.3e2 $\pm$ 1.1e2   | 1.3e-1 $\pm$ 0.2e-1   | 0e0 $\pm$ 0       | 0e0 $\pm$ 0       | 0e0 $\pm$ 0             |
| 10  | 0 $\pm$ 0         | 3.6e2 $\pm$ 0.6e2   | 5.3e-2 $\pm$ 0.8e-2   | 0e0 $\pm$ 0       | 0e0 $\pm$ 0       | 0e0 $\pm$ 0             |
| 11  | 0 $\pm$ 0         | 1.8e2 $\pm$ 0.3e2   | 2.2e-2 $\pm$ 0.3e-2   | 0e0 $\pm$ 0       | 0e0 $\pm$ 0       | 0e0 $\pm$ 0             |
| 12  | 0 $\pm$ 0         | 9.1e1 $\pm$ 1.4e1   | 9.5e-3 $\pm$ 1.5e-3   | 0e0 $\pm$ 0       | 0e0 $\pm$ 0       | 0e0 $\pm$ 0             |
| 13  | 0 $\pm$ 0         | 4.6e1 $\pm$ 0.7e1   | 4.1e-3 $\pm$ 0.6e-3   | 0e0 $\pm$ 0       | 0e0 $\pm$ 0       | 0e0 $\pm$ 0             |
| 14  | 0 $\pm$ 0         | 2.3e1 $\pm$ 0.4e1   | 1.8e-3 $\pm$ 0.3e-3   | 0e0 $\pm$ 0       | 0e0 $\pm$ 0       | 0e0 $\pm$ 0             |
| 15  | 0 $\pm$ 0         | 1.1e1 $\pm$ 0.2e1   | 7.8e-4 $\pm$ 1.2e-4   | 0e0 $\pm$ 0       | 0e0 $\pm$ 0       | 0e0 $\pm$ 0             |
| 16  | 0 $\pm$ 0         | 5.7 $\pm$ 0.9       | 3.5e-4 $\pm$ 0.5e-4   | 0e0 $\pm$ 0       | 0e0 $\pm$ 0       | 0e0 $\pm$ 0             |
| 17  | 0 $\pm$ 0         | 2.8 $\pm$ 0.4       | 1.5e-4 $\pm$ 0.2e-4   | 0e0 $\pm$ 0       | 0e0 $\pm$ 0       | 0e0 $\pm$ 0             |
| 18  | 0 $\pm$ 0         | 1.4 $\pm$ 0.2       | 6.9e-5 $\pm$ 1.1e-5   | 0e0 $\pm$ 0       | 0e0 $\pm$ 0       | 0e0 $\pm$ 0             |
| 19  | 0 $\pm$ 0         | 7.1e-1 $\pm$ 1.1e-1 | 3.1e-5 $\pm$ 0.5e-5   | 0e0 $\pm$ 0       | 0e0 $\pm$ 0       | 0e0 $\pm$ 0             |
| 20  | 0 $\pm$ 0         | 3.6e-1 $\pm$ 0.6e-1 | 1.4e-5 $\pm$ 0.2e-5   | 0e0 $\pm$ 0       | 0e0 $\pm$ 0       | 0e0 $\pm$ 0             |
| 21  | 0 $\pm$ 0         | 1.8e-1 $\pm$ 0.3e-1 | 6.4e-6 $\pm$ 1e-6     | 0e0 $\pm$ 0       | 0e0 $\pm$ 0       | 0e0 $\pm$ 0             |
| 22  | 0 $\pm$ 0         | 8.9e-2 $\pm$ 1.4e-2 | 2.9e-6 $\pm$ 0.5e-6   | 0e0 $\pm$ 0       | 0e0 $\pm$ 0       | 0e0 $\pm$ 0             |
| 23  | 0 $\pm$ 0         | 4.4e-2 $\pm$ 0.7e-2 | 1.3e-6 $\pm$ 0.2e-6   | 0e0 $\pm$ 0       | 0e0 $\pm$ 0       | 0e0 $\pm$ 0             |
| 24  | 0 $\pm$ 0         | 2.2e-2 $\pm$ 0.3e-2 | 6.1e-7 $\pm$ 0.9e-7   | 0e0 $\pm$ 0       | 0e0 $\pm$ 0       | 0e0 $\pm$ 0             |
| 25  | 0 $\pm$ 0         | 1.1e-2 $\pm$ 0.2e-2 | 2.8e-7 $\pm$ 0.4e-7   | 0e0 $\pm$ 0       | 0e0 $\pm$ 0       | 0e0 $\pm$ 0             |
| 26  | 0 $\pm$ 0         | 5.6e-3 $\pm$ 0.9e-3 | 1.3e-7 $\pm$ 0.2e-7   | 0e0 $\pm$ 0       | 0e0 $\pm$ 0       | 0e0 $\pm$ 0             |
| 27  | 0 $\pm$ 0         | 2.8e-3 $\pm$ 0.4e-3 | 6e-8 $\pm$ 0.9e-8     | 0e0 $\pm$ 0       | 0e0 $\pm$ 0       | 0e0 $\pm$ 0             |
| 28  | 0 $\pm$ 0         | 1.4e-3 $\pm$ 0.2e-3 | 2.8e-8 $\pm$ 0.4e-8   | 0e0 $\pm$ 0       | 0e0 $\pm$ 0       | 0e0 $\pm$ 0             |
| 29  | 0 $\pm$ 0         | 7e-4 $\pm$ 1.1e-4   | 1.3e-8 $\pm$ 0.2e-8   | 0e0 $\pm$ 0       | 0e0 $\pm$ 0       | 0e0 $\pm$ 0             |
| 30  | 0 $\pm$ 0         | 3.5e-4 $\pm$ 0.5e-4 | 6.1e-9 $\pm$ 0.9e-9   | 0e0 $\pm$ 0       | 0e0 $\pm$ 0       | 0e0 $\pm$ 0             |
| 31  | 0 $\pm$ 0         | 1.7e-4 $\pm$ 0.3e-4 | 2.8e-9 $\pm$ 0.4e-9   | 0e0 $\pm$ 0       | 0e0 $\pm$ 0       | 0e0 $\pm$ 0             |
| 32  | 0 $\pm$ 0         | 8.7e-5 $\pm$ 1.3e-5 | 1.3e-9 $\pm$ 0.2e-9   | 0e0 $\pm$ 0       | 0e0 $\pm$ 0       | 0e0 $\pm$ 0             |
| 33  | 0 $\pm$ 0         | 4.3e-5 $\pm$ 0.7e-5 | 6.2e-10 $\pm$ 1e-10   | 0e0 $\pm$ 0       | 0e0 $\pm$ 0       | 0e0 $\pm$ 0             |
| 34  | 0 $\pm$ 0         | 2.2e-5 $\pm$ 0.3e-5 | 2.9e-10 $\pm$ 0.5e-10 | 0e0 $\pm$ 0       | 0e0 $\pm$ 0       | 0e0 $\pm$ 0             |
| 35  | 0 $\pm$ 0         | 1.1e-5 $\pm$ 0.2e-5 | 1.4e-10 $\pm$ 0.2e-10 | 0e0 $\pm$ 0       | 0e0 $\pm$ 0       | 0e0 $\pm$ 0             |
| 36  | 0 $\pm$ 0         | 5.4e-6 $\pm$ 0.8e-6 | 6.5e-11 $\pm$ 1e-11   | 0e0 $\pm$ 0       | 0e0 $\pm$ 0       | 0e0 $\pm$ 0             |
| 37  | 0 $\pm$ 0         | 2.7e-6 $\pm$ 0.4e-6 | 3.1e-11 $\pm$ 0.5e-11 | 0e0 $\pm$ 0       | 0e0 $\pm$ 0       | 0e0 $\pm$ 0             |

The average of the prevalence, the CFU-values per square meter (cfu/sqm) and per gram manure are calculated over all iterations. The CFU values in the intestine as well as the excreted and ingested quantities are obtained by calculating the average over all animals in one iteration at first and then over all iterations.

**Table S28b (log<sub>10</sub> CFU). Calculated numeric values for scenario when the pen is contaminated with 10<sup>6</sup> CFU at the beginning of the fattening period, measure reduced growth rate of ESBLs in the intestines. Setting: 90 negative birds, Ross 308, feeding duration 36 days, stocking density 39 kg/m<sup>2</sup>, 1000 g litter/m<sup>2</sup>, growth rate 10<sup>4</sup>**

| day | prevalence in % | cfu/sqm           | cfu/g manure      | cfu in intestine  | cfu/g feces       | cfu ingested per animal |
|-----|-----------------|-------------------|-------------------|-------------------|-------------------|-------------------------|
|     | (% mean ± sd)   | (log10 mean ± sd) | (log10 mean ± sd) | (log10 mean ± sd) | (log10 mean ± sd) | (log10 mean ± sd)       |
| 1   | 0 ± 0           | 4.97 ± -Inf       | 1.9 ± -Inf        | -Inf ± -Inf       | -Inf ± -Inf       | -Inf ± 0                |
| 2   | 0 ± 0           | 4.67 ± -Inf       | 1.54 ± -Inf       | -Inf ± -Inf       | -Inf ± -Inf       | -Inf ± 0                |
| 3   | 73.54 ± 4.64    | 4.46 ± 3.14       | 1.24 ± -0.08      | 3.06 ± 2.44       | 1.25 ± 0.63       | 0.9 ± 0                 |
| 4   | 77.04 ± 4.79    | 4.28 ± 3.23       | 0.95 ± -0.11      | 2.97 ± 2.44       | 0.97 ± 0.44       | 0.67 ± -0.35            |
| 5   | 43.66 ± 15.02   | 4.07 ± 3.26       | 0.63 ± -0.18      | 2.62 ± 2.37       | 0.55 ± 0.3        | 0.39 ± -0.3             |
| 6   | 0 ± 0           | 3.77 ± 2.96       | 0.26 ± -0.55      | -Inf ± -Inf       | -Inf ± -Inf       | 0.03 ± -0.56            |
| 7   | 0 ± 0           | 3.46 ± 2.65       | -0.14 ± -0.95     | -Inf ± -Inf       | -Inf ± -Inf       | -1.52 ± -0.77           |
| 8   | 0 ± 0           | 3.16 ± 2.35       | -0.52 ± -1.33     | -Inf ± -Inf       | -Inf ± -Inf       | -Inf ± 0                |
| 9   | 0 ± 0           | 2.86 ± 2.05       | -0.9 ± -1.71      | -Inf ± -Inf       | -Inf ± -Inf       | -Inf ± 0                |
| 10  | 0 ± 0           | 2.56 ± 1.75       | -1.28 ± -2.09     | -Inf ± -Inf       | -Inf ± -Inf       | -Inf ± 0                |
| 11  | 0 ± 0           | 2.26 ± 1.45       | -1.65 ± -2.46     | -Inf ± -Inf       | -Inf ± -Inf       | -Inf ± 0                |
| 12  | 0 ± 0           | 1.96 ± 1.15       | -2.02 ± -2.83     | -Inf ± -Inf       | -Inf ± -Inf       | -Inf ± 0                |
| 13  | 0 ± 0           | 1.66 ± 0.85       | -2.39 ± -3.2      | -Inf ± -Inf       | -Inf ± -Inf       | -Inf ± 0                |
| 14  | 0 ± 0           | 1.36 ± 0.55       | -2.75 ± -3.56     | -Inf ± -Inf       | -Inf ± -Inf       | -Inf ± 0                |
| 15  | 0 ± 0           | 1.06 ± 0.25       | -3.11 ± -3.92     | -Inf ± -Inf       | -Inf ± -Inf       | -Inf ± 0                |
| 16  | 0 ± 0           | 0.76 ± -0.05      | -3.46 ± -4.27     | -Inf ± -Inf       | -Inf ± -Inf       | -Inf ± 0                |
| 17  | 0 ± 0           | 0.45 ± -0.36      | -3.81 ± -4.62     | -Inf ± -Inf       | -Inf ± -Inf       | -Inf ± 0                |
| 18  | 0 ± 0           | 0.15 ± -0.66      | -4.16 ± -4.97     | -Inf ± -Inf       | -Inf ± -Inf       | -Inf ± 0                |
| 19  | 0 ± 0           | -0.15 ± -0.96     | -4.51 ± -5.32     | -Inf ± -Inf       | -Inf ± -Inf       | -Inf ± 0                |
| 20  | 0 ± 0           | -0.45 ± -1.26     | -4.85 ± -5.66     | -Inf ± -Inf       | -Inf ± -Inf       | -Inf ± 0                |
| 21  | 0 ± 0           | -0.75 ± -1.56     | -5.19 ± -6        | -Inf ± -Inf       | -Inf ± -Inf       | -Inf ± 0                |
| 22  | 0 ± 0           | -1.05 ± -1.86     | -5.53 ± -6.34     | -Inf ± -Inf       | -Inf ± -Inf       | -Inf ± 0                |
| 23  | 0 ± 0           | -1.35 ± -2.16     | -5.87 ± -6.68     | -Inf ± -Inf       | -Inf ± -Inf       | -Inf ± 0                |
| 24  | 0 ± 0           | -1.65 ± -2.46     | -6.21 ± -7.02     | -Inf ± -Inf       | -Inf ± -Inf       | -Inf ± 0                |
| 25  | 0 ± 0           | -1.95 ± -2.76     | -6.55 ± -7.36     | -Inf ± -Inf       | -Inf ± -Inf       | -Inf ± 0                |
| 26  | 0 ± 0           | -2.25 ± -3.07     | -6.88 ± -7.69     | -Inf ± -Inf       | -Inf ± -Inf       | -Inf ± 0                |
| 27  | 0 ± 0           | -2.56 ± -3.37     | -7.22 ± -8.03     | -Inf ± -Inf       | -Inf ± -Inf       | -Inf ± 0                |
| 28  | 0 ± 0           | -2.86 ± -3.67     | -7.55 ± -8.36     | -Inf ± -Inf       | -Inf ± -Inf       | -Inf ± 0                |
| 29  | 0 ± 0           | -3.16 ± -3.97     | -7.89 ± -8.7      | -Inf ± -Inf       | -Inf ± -Inf       | -Inf ± 0                |
| 30  | 0 ± 0           | -3.46 ± -4.27     | -8.22 ± -9.03     | -Inf ± -Inf       | -Inf ± -Inf       | -Inf ± 0                |
| 31  | 0 ± 0           | -3.76 ± -4.57     | -8.55 ± -9.36     | -Inf ± -Inf       | -Inf ± -Inf       | -Inf ± 0                |
| 32  | 0 ± 0           | -4.06 ± -4.87     | -8.88 ± -9.69     | -Inf ± -Inf       | -Inf ± -Inf       | -Inf ± 0                |
| 33  | 0 ± 0           | -4.36 ± -5.17     | -9.21 ± -10.02    | -Inf ± -Inf       | -Inf ± -Inf       | -Inf ± 0                |
| 34  | 0 ± 0           | -4.66 ± -5.47     | -9.53 ± -10.34    | -Inf ± -Inf       | -Inf ± -Inf       | -Inf ± 0                |
| 35  | 0 ± 0           | -4.96 ± -5.77     | -9.86 ± -10.67    | -Inf ± -Inf       | -Inf ± -Inf       | -Inf ± 0                |
| 36  | 0 ± 0           | -5.27 ± -6.08     | -10.19 ± -11      | -Inf ± -Inf       | -Inf ± -Inf       | -Inf ± 0                |
| 37  | 0 ± 0           | -5.57 ± -6.38     | -10.51 ± -11.32   | -Inf ± -Inf       | -Inf ± -Inf       | -Inf ± 0                |

The average of the prevalence, the CFU-values per square meter (cfu/sqm) and per gram manure are calculated over all iterations. The CFU values in the intestine as well as the excreted and ingested quantities are obtained by calculating the average over all animals in one iteration at first and then over all iterations. The decadic logarithm of zero or negative values is negative infinite (-Inf).
